# Supplementary material for: The Human Phenotype Ontology: Semantic Unification of Common and Rare Disease
Source: PubMed Central journal article supplement (PMC4572507; doi:10.1016/j.ajhg.2015.05.020), 2015-07-02
Supplement: mmc1.pdf [file mmc1.pdf]

The American Journal of Human Genetics

Supplemental Data

## **The Human Phenotype Ontology:**

### **Semantic Unification of Common and Rare Disease**

Tudor Groza, Sebastian Köhler, Dawid Moldenhauer, Nicole Vasilevsky, Gareth Baynam, Tomasz Zemojtel, Lynn Marie Schriml, Warren Alden Kibbe, Paul N. Schofield, Tim Beck, Drashti Vasant, Anthony J. Brookes, Andreas Zankl, Nicole L. Washington, Christopher J. Mungall, Suzanna E. Lewis, Melissa A. Haendel, Helen Parkinson, and Peter N. Robinson

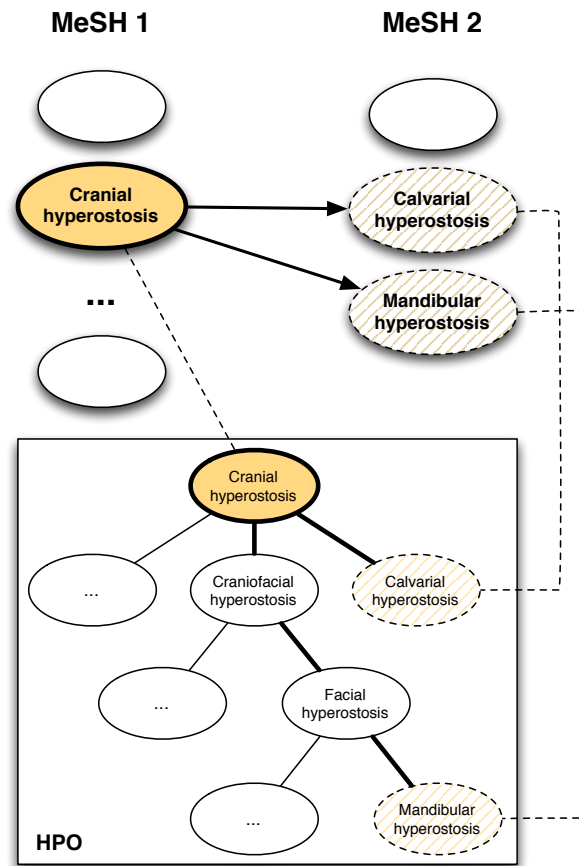

**Figure S1. Adapted Jaccard measure.** Example of using the HPO structure to compute the Jaccard index between the annotations of two different MeSH disorders. The standard Jaccard index is computed based on the assumption that the underlying data is represented as sets of symbolic elements. As a result, the index computes the ratio between the strict intersection and union of these elements. As opposed to symbolic elements, ontological concepts have the advantage of being structured in a logical hierarchy. This enables us to use the existing subsumption relation to quantify the degree of similarity between concepts, for example, by looking the path they share. This intrinsic similarity can also be exploited when computing the Jaccard index. Instead of performing the strict intersection and union of two sets of concepts, we considered a match also when two concepts share lineage – i.e., when one concept is an ancestor of the second. Such an example is presented in this figure, where *Cranial hyperostosis* is a parent of *Calvarial hyperostosis* and an ancestor of *Mandibular hyperostosis*, which leads to *Cranial hyperostosis* being the common ground for intersection between the two phenotype lists associated with MeSH 1 and MeSH 2.

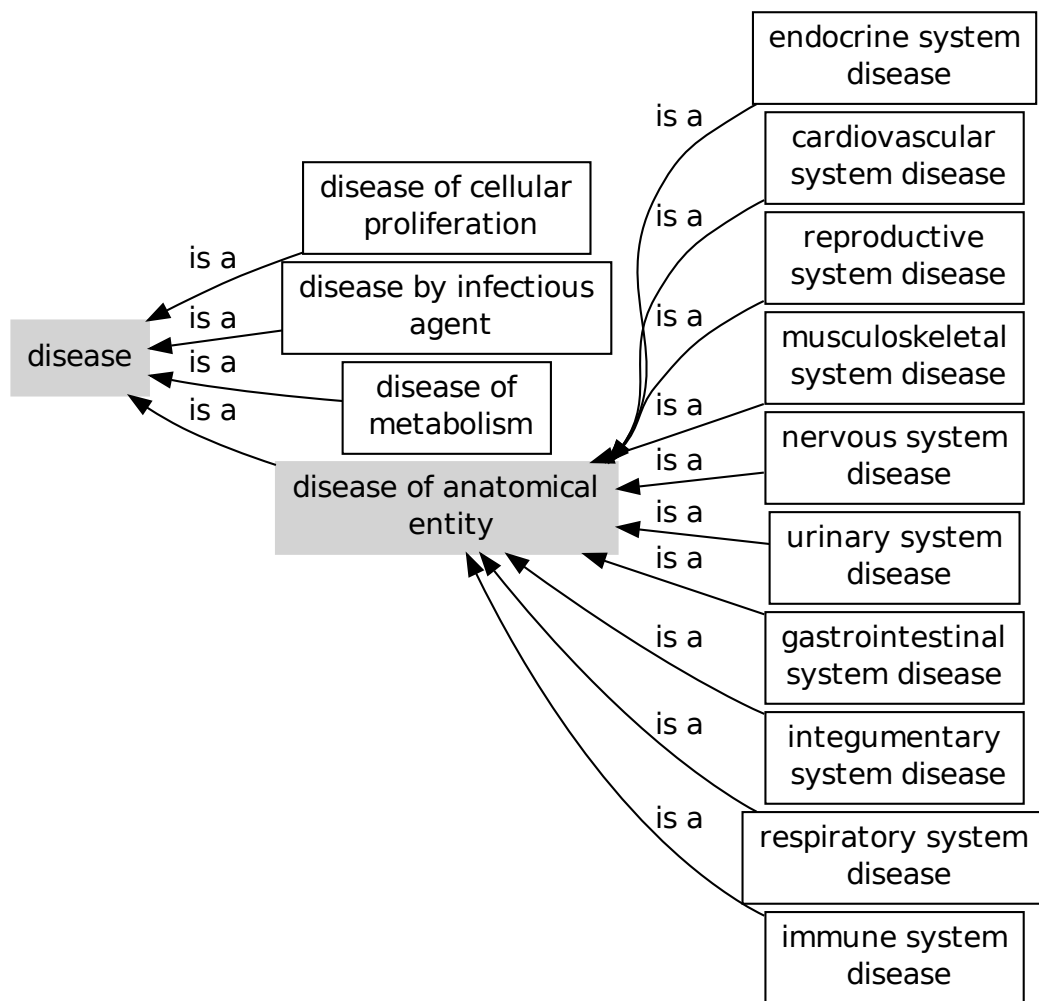

**Figure S2. Disease Ontology Classes used for Clustering Common Disease.** We chose 13 classes from the Disease Ontology [1] that represented standard categories used in internal medicine. Some class were excluded because they contained too few diseases (e.g., *thoracic disease*, n=13 diseases), or because they contained rare diseases (genetic disease or syndrome). The general classes “disease” and “disease of anatomical entity” (shown in light gray) were not included in the analysis.

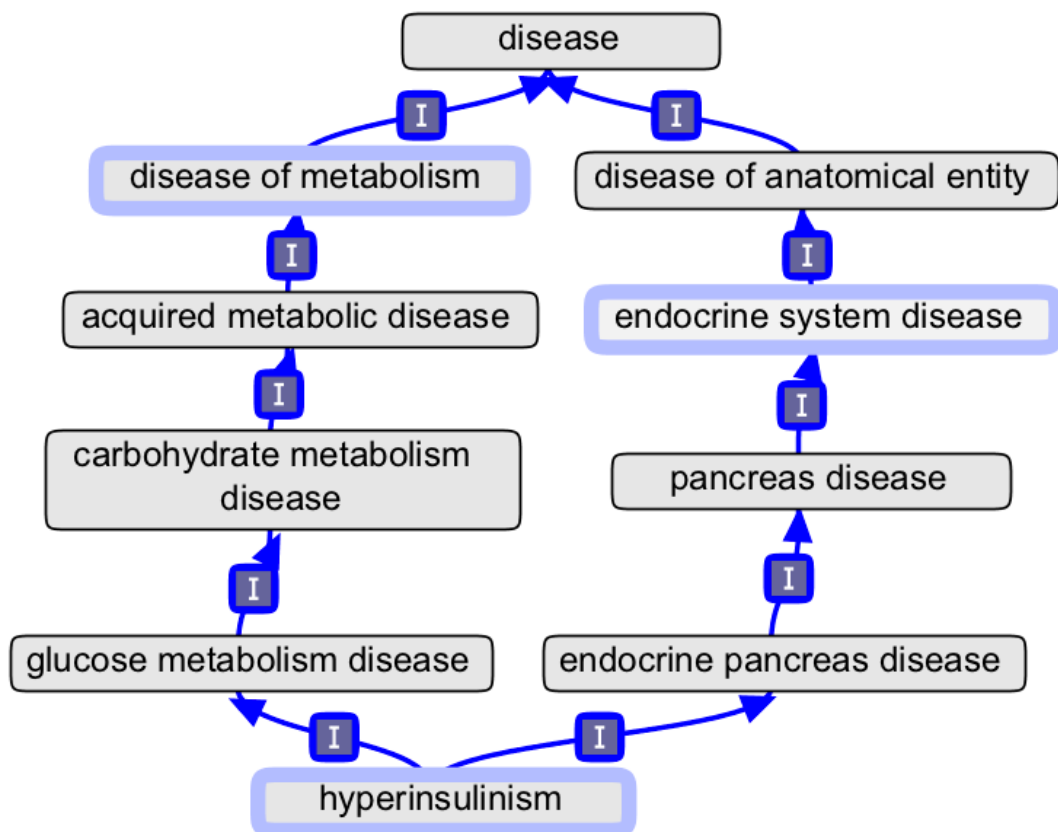

**Figure S3. Diseases belonging to multiple Disease Ontology Classes.** In some cases, individual diseases belong to more than one category. For instance, and as shown here, Hyperinsulinism is categorized as “disease of metabolism” and “endocrine system disease”.

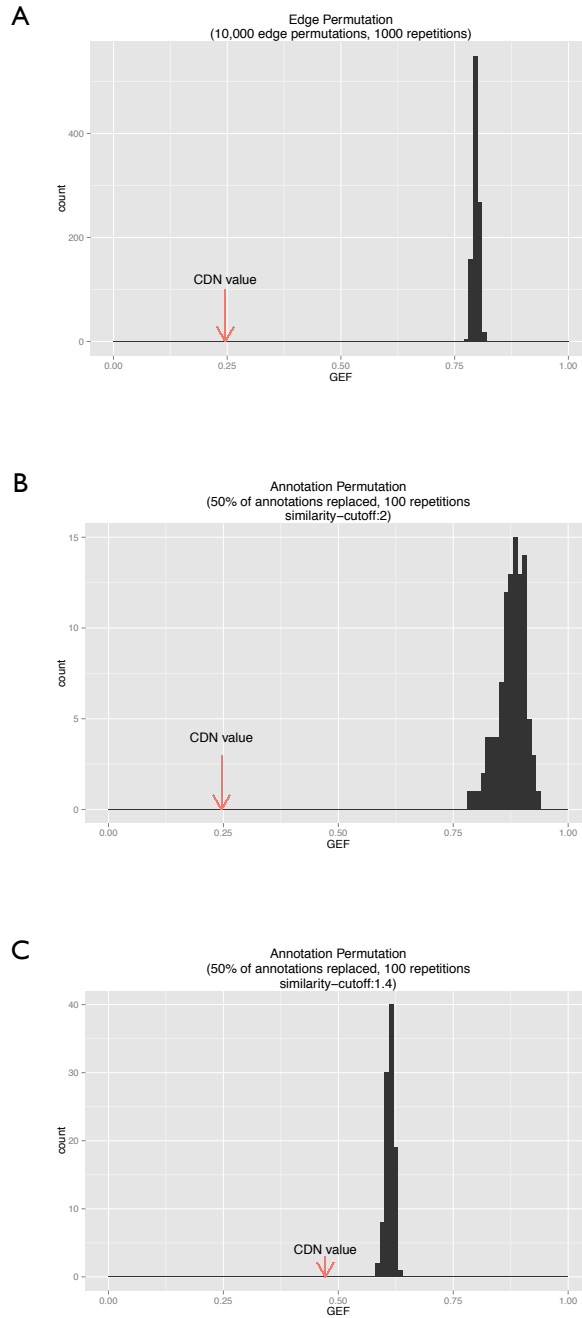

**Figure S4. Grey edge fraction analysis of the CDN.** Histograms of the *grey edge fraction* (GEF) values obtained by randomizations of the CDN. The red arrows show the GEF value of the original CDN. **(A)** Edge-randomized version of the original CDN (CDN-*o*) in which edges between diseases were randomly shuffled 10,000 times (CDN-*er*). Not one of the randomized networks achieved as good a result as the value for CDN-*o* (empirical  $p$  value  $< 10^{-4}$ ). **(B)** Annotation-randomized version of CDN-*o* in which 50% of the annotations were replaced by random annotations (threshold similarity value  $simcut = 2.0$ ). **(C)** Similar to (B) but with threshold similarity value  $simcut = 1.4$ . In both simulations, not a single randomized network performed as well as the observed network, corresponding to an empirical  $p$  value of  $p < 0.01$ .

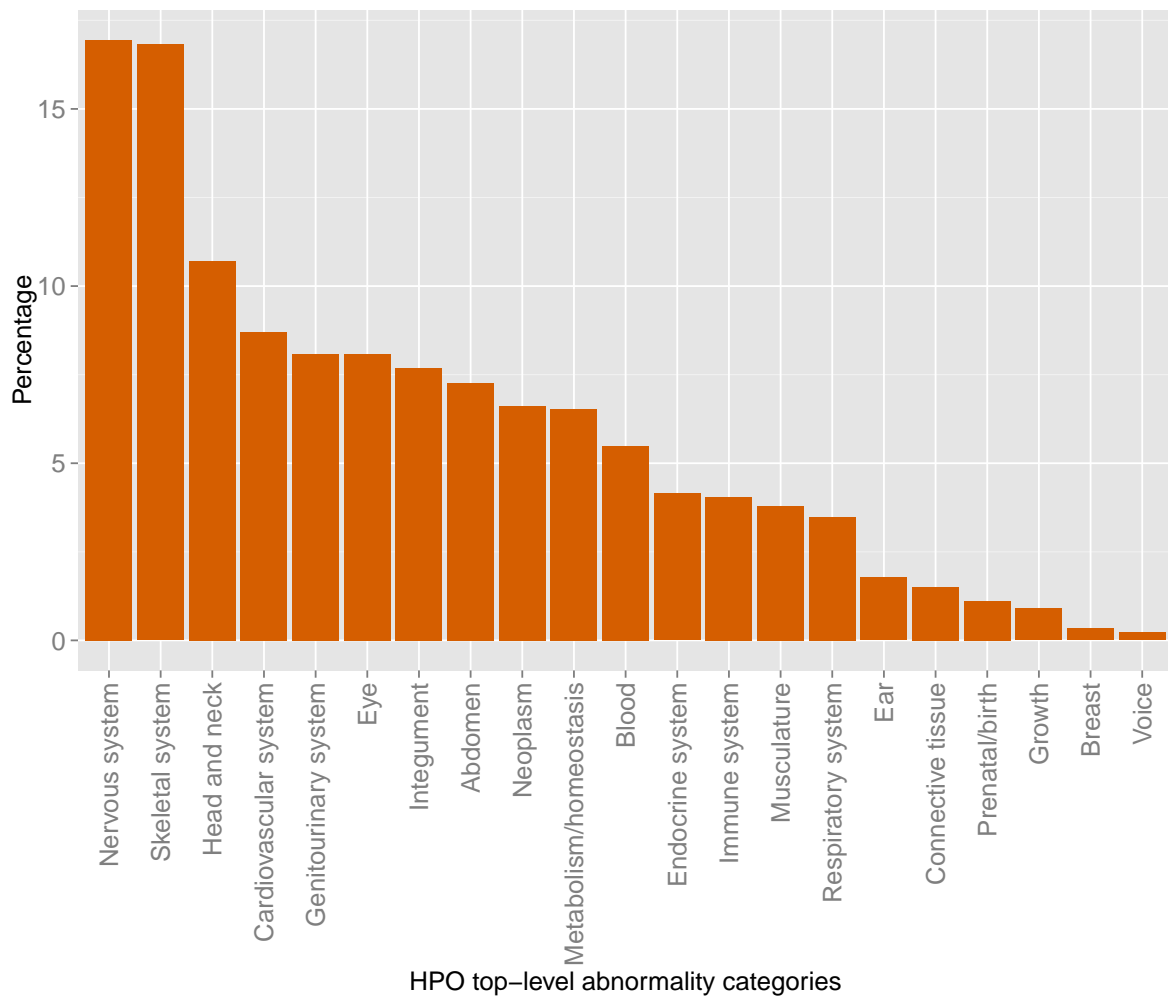

**Figure S5. Distribution of top-level HPO Annotations among common diseases.** The distribution of extracted HPO annotations according to the top level HPO concepts in the list of common MeSH disorders.

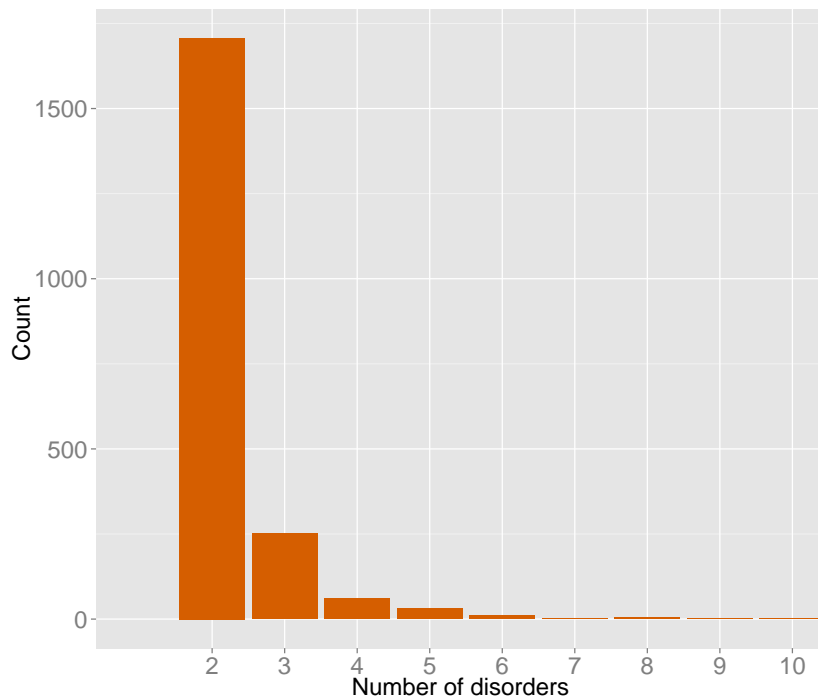

**Figure S6. SNP Sharing.** The figure shows the overall number of SNPs that are associated with multiple common diseases (among all 3145 common diseases examined in this project). Thus, the great majority of SNPs that are associated with multiple diseases are shared by a pair of diseases, but several hundred different SNPs are shared by three diseases, and so on. This analysis was based on a total of 16,152 SNPs listed in the GWAS Central database. Of these, 15,289 were associated with only a single disease. SNPs that were associated with two or more diseases are included in the bar chart shown in this Figure.

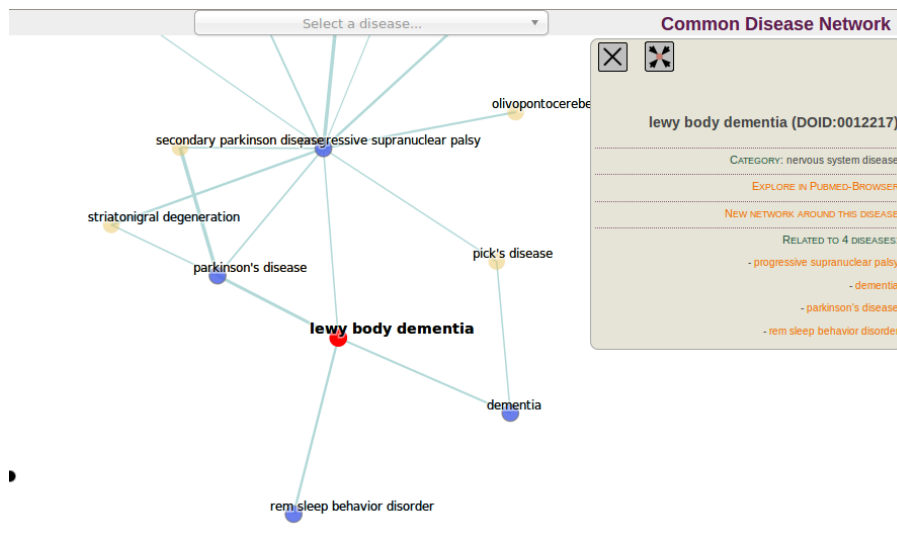

**Figure S7. Common Disease Network (CDN) browser.** Users can navigate throughout the network of common diseases that are interconnected by phenotypic similarity. To get to this page, enter the name of a disease (e.g., “Lewy body disease” into the search field at <http://pubmed-browser.human-phenotype-ontology.org/>, and choose the corresponding MeSH disease entry. The server will return a page entitled “Search Results” with a number of items. The disease page for “Lewy body disease” can now be reached via the link near the top of the Search Results page (the link next to the stethoscope symbol). This page, located at <http://pubmed-browser.human-phenotype-ontology.org/#/mesh/D020961>, contains a link “View Disease Network”, that will open up the view shown in this Figure. Clicking on any of the nodes in the network will open up a window with additional information.



**Table S1.** Overview of HPO annotations for **Giant Cell Arteritis** that were derived by concept recognition in PubMed using BioLark. There were 68 true positives, 38 false positives, and 79 false negatives.

| ID         | Name                                    | pmid                 | status | ID         | Name                             | pmid                | status |
|------------|-----------------------------------------|----------------------|--------|------------|----------------------------------|---------------------|--------|
| HP:0002633 | Vasculitis                              | 3160017              | TP     | HP:0002331 | Headache (with pheochromocytoma) |                     | FP     |
| HP:0000572 | Visual loss                             | 10387327             | TP     | HP:0001138 | Optic neuropathy                 | 10387327            | TP     |
| HP:0003565 | Elevated erythrocyte sedimentation rate | 23795218             | TP     | HP:0001945 | Fever                            | 7242167             | TP     |
| HP:0005310 | Large vessel vasculitis                 | 7081559<br>15604899  | TP     | HP:0001824 | Weight loss                      | 21953306            | TP     |
| HP:0001297 | Stroke                                  | 18640460             | TP     | HP:0002955 | Granulomatosis                   |                     | FP     |
| HP:0001370 | Rheumatoid arthritis                    |                      | FP     | HP:0000651 | Diplopia                         | 22119350            | TP     |
| HP:0001903 | Anemia                                  |                      | FP     | HP:0003326 | Myalgia                          | 6199905             | TP     |
| HP:0100576 | Amaurosis fugax                         | 9433866              | TP     | HP:0002617 | Aneurysm                         | 18634260            | TP     |
| HP:0004942 | Aortic aneurysm                         | 18021519             | TP     | HP:0002315 | Headache                         | 15384038            | TP     |
| HP:0003453 | Antineutrophil antibody positivity      |                      | FP     | HP:0100545 | Arterial stenosis                | 22119350            | TP     |
| HP:0000969 | Edema                                   |                      | FP     | HP:0000822 | Hypertension                     |                     | FP     |
| HP:0002621 | Atherosclerosis                         |                      | FP     | HP:0001369 | Arthritis                        | 2652937<br>2068658  | TP     |
| HP:0002622 | Dissecting aortic aneurysm              | 16766372             | TP     | HP:0009742 | Stiff shoulders                  | 23795218            | TP     |
| HP:0002725 | Systemic lupus erythematosus            |                      | FP     | HP:0002039 | Anorexia                         | 7242167<br>21953306 | TP     |
| HP:0001659 | Aortic regurgitation                    | 16829112             | TP     | HP:0100769 | Synovitis                        | 18640460<br>9448986 | TP     |
| HP:0001324 | Muscle weakness                         | 12861494             | TP     | HP:0000939 | Osteoporosis                     |                     | FP     |
| HP:0002076 | Migraine                                | 955413<br>9747046    | TP     | HP:0011944 | Small vessel vasculitis          | 21953306            | TP     |
| HP:0001894 | Thrombocytosis                          | 16543040<br>9222239  | TP     | HP:0011034 | Amyloidosis                      | 1128873             | TP     |
| HP:0009830 | Peripheral neuropathy                   |                      | FP     | HP:0001658 | Myocardial infarction            | 17546258            | TP     |
| HP:0100758 | Gangrene                                | 16344614             | TP     | HP:0004417 | Intermittent claudication        | 11409140            | TP     |
| HP:0002634 | Arteriosclerosis                        | 1078327              | TP     | HP:0003365 | Arthralgia of the hip            | 9458228             | TP     |
| HP:0001880 | Eosinophilia                            |                      | FP     | HP:0000505 | Visual impairment                | 9747046             | TP     |
| HP:0002647 | Aortic dissection                       | 16845847             | TP     | HP:0001289 | Confusion                        |                     | FP     |
| HP:0100546 | Carotid artery stenosis                 | 10458090             | TP     | HP:0001123 | Visual field defect              | 1243233             | TP     |
| HP:0009831 | Mononeuropathy                          | 2996347              | TP     | HP:0100661 | Trigeminal neuralgia             |                     | FP     |
| HP:0003155 | Elevated alkaline phosphatase           | 1790639              | TP     | HP:0000718 | Aggressive behavior              |                     | FP     |
| HP:0002090 | Pneumonia                               |                      | FP     | HP:0002326 | Transient ischemic attack        | 3347337             | TP     |
| HP:0000622 | Blurred vision                          | 18052956             | TP     | HP:0004420 | Arterial thrombosis              | 17546258            | TP     |
| HP:0000602 | Ophthalmoplegia                         | 1807820              | TP     | HP:0000819 | Diabetes mellitus                |                     | FP     |
| HP:0001287 | Meningitis                              |                      | FP     | HP:0000648 | Optic atrophy                    | 7222706             | TP     |
| HP:0002631 | Ascending aortic aneurysm               | 17310805             | TP     | HP:0003470 | Paralysis                        |                     | FP     |
| HP:0000726 | Dementia                                | 1766283              | TP     | HP:0000501 | Glaucoma                         |                     | FP     |
| HP:0003552 | Muscle stiffness                        | 1807819              | TP     | HP:0100653 | Optic neuritis                   | 8523347             | TP     |
| HP:0007686 | Abnormal pupillary function             | 19733885<br>15590540 | TP     | HP:0000979 | Purpura                          |                     | FP     |
| HP:0011134 | Low-grade fever                         | 17180298             | TP     | HP:0000518 | Cataract                         |                     | FP     |

*continued on the next page*

Table S1. Giant Cell Arteritis – continued

| ID         | Name                              | pmid                 | status | ID         | Name                                 | pmid                 | status |
|------------|-----------------------------------|----------------------|--------|------------|--------------------------------------|----------------------|--------|
| HP:0100324 | Scleroderma                       |                      | FP     | HP:0007354 | Amyotrophic lateral sclerosis        |                      | FP     |
| HP:0005294 | Arterial dissection               |                      | FP     | HP:0000529 | Progressive visual loss              | 17504884             | TP     |
| HP:0003881 | Humeral sclerosis                 |                      | FP     | HP:0000100 | Nephrotic syndrome                   | 9058675              | TP     |
| HP:0011227 | Elevated C-reactive protein level | 23795218             | TP     | HP:0003207 | Arterial calcification               | 9196863              | TP     |
| HP:0004950 | Peripheral arterial disease       | 12835863<br>15710711 | TP     | HP:0000246 | Sinusitis                            |                      | FP     |
| HP:0006824 | Cranial nerve paralysis           | 22802376<br>6297074  | TP     | HP:0100749 | Chest pain                           | 16829112             | TP     |
| HP:0001269 | Hemiparesis                       | 12143952             | TP     | HP:0001271 | Polyneuropathy                       | 1402990              | TP     |
| HP:0100646 | Thyroiditis                       |                      | FP     | HP:0000365 | Hearing impairment                   | 20233486             | TP     |
| HP:0002910 | Elevated hepatic transaminases    | 7263904              | TP     | HP:0008653 | Crescentic glomerulonephritis        | 12200821             | TP     |
| HP:0000820 | Abnormality of the thyroid gland  |                      | FP     | HP:0002829 | Arthralgia                           | 21627866             | TP     |
| HP:0001609 | Hoarse voice                      | 7863116              | TP     | HP:0002140 | Ischemic stroke                      | 20609853             | TP     |
| HP:0002758 | Osteoarthritis                    |                      | FP     | HP:0001997 | Gout                                 |                      | FP     |
| HP:0000821 | Hypothyroidism                    | 1913003<br>8094625   | TP     | HP:0011510 | Drusen                               | 10150824             | TP     |
| HP:0000639 | Nystagmus                         | 2765284              | TP     | HP:0001145 | Chorioretinopathy                    |                      | FP     |
| HP:0000836 | Hyperthyroidism                   |                      | FP     | HP:0005113 | Dilatation of the aortic arch        |                      | FP     |
| HP:0100026 | Arteriovenous malformation        |                      | FP     | HP:0003095 | Septic arthritis                     |                      | FP     |
| HP:0005111 | Dilatation of the ascending aorta | -                    | TP     | HP:0004933 | Ascending aortic dissection          | 19049773<br>21521678 | TP     |
| HP:0005059 | arthralgia/arthritis              |                      | FP     | HP:0000495 | Recurrent corneal erosions           |                      | FP     |
| HP:0005318 | Cerebral vasculitis               | 8033943              | FN     | HP:0002616 | Aortic root dilatation               | 2209142<br>4030882   | FN     |
| HP:0001955 | Unexplained fevers                | 218291               | FN     | HP:0005200 | Retroperitoneal fibrosis             | 24885445             | FN     |
| HP:0002367 | Visual hallucinations             | 11550973             | FN     | HP:0001085 | Papilledema                          | 131544               | FN     |
| HP:0002301 | Hemiplegia                        | 501373               | FN     | HP:0001260 | Dysarthria                           | 9745245              | FN     |
| HP:0002113 | Pulmonary infiltrates             | 8777858<br>2052510   | FN     | HP:0009763 | Limb pain                            | 2655505              | FN     |
| HP:0000520 | Proptosis                         | 18052956             | FN     | HP:0003613 | Antiphospholipid antibody positivity | 11503135             | FN     |
| HP:0001701 | Pericarditis                      | 17335942             | FN     | HP:0001698 | Pericardial effusion                 | 17031245             | FN     |
| HP:0003401 | Paresthesia                       | 20609853             | FN     | HP:0000508 | Ptosis                               | 12143952             | FN     |
| HP:0004953 | Abdominal aortic aneurysm         | 13679546             | FN     | HP:0000554 | Uveitis                              | 17020003             | FN     |
| HP:0004944 | Cerebral aneurysm                 | 17961913             | FN     | HP:0001681 | Angina pectoris                      | 2759121              | FN     |
| HP:0003198 | Myopathy                          | 9739500              | FN     | HP:0001279 | Syncope                              | 6380900              | FN     |
| HP:0002138 | Subarachnoid hemorrhage           | 1990421              | FN     | HP:0002321 | Vertigo                              | 3230240              | FN     |
| HP:0100584 | Endocarditis                      | 16859594             | FN     | HP:0002202 | Pleural effusion                     | 20400261             | FN     |
| HP:0001724 | Aortic dilatation                 | 7361287              | FN     | HP:0001974 | Leukocytosis                         | 16148728             | FN     |
| HP:0001907 | Thromboembolism                   | 19811309             | FN     | HP:0003774 | Stage 5 chronic kidney disease       | 15384038<br>10620555 | FN     |
| HP:0002637 | Cerebral ischemia                 | 20626748             | FN     | HP:0002527 | Falls                                | 16859597             | FN     |
| HP:0001635 | Congestive heart failure          | 955413<br>17269602   | FN     | HP:0000083 | Renal insufficiency                  | 1489011              | FN     |
| HP:0002960 | Autoimmunity                      | 7581345              | FN     | HP:0000618 | Blindness                            | 21953306             | FN     |
| HP:0000716 | Depression                        | 1807819              | FN     | HP:0000543 | Optic disc pallor                    | 17020004             | FN     |

*continued on the next page*

Table S1. Giant Cell Arteritis – continued

| ID         | Name                            | pmid                 | status | ID         | Name                                 | pmid                 | status |
|------------|---------------------------------|----------------------|--------|------------|--------------------------------------|----------------------|--------|
| HP:0200029 | Vasculitis in the skin          | 14528512             | FN     | HP:0100534 | Episcleritis                         | 1012996              | FN     |
| HP:0000597 | Ophthalmoparesis                | 3057903              | FN     | HP:0001342 | Cerebral hemorrhage                  | 9385928              | FN     |
| HP:0006530 | Interstitial pulmonary disease  | 8745756              | FN     | HP:0010783 | Erythema                             | 3675013              | FN     |
| HP:0000093 | Proteinuria                     | 2729757              | FN     | HP:0002027 | Abdominal pain                       | 18204370             | FN     |
| HP:0100543 | Cognitive impairment            | 2330100              | FN     | HP:0100963 | Hyperesthesia                        | 19497602             | FN     |
| HP:0100704 | Cortical visual impairment      | 3057903              | FN     | HP:0100532 | Scleritis                            | 17020003             | FN     |
| HP:0001965 | Abnormality of the scalp        | 21953306<br>17476617 | FN     | HP:0000282 | Facial edema                         | 8689287              | FN     |
| HP:0002907 | Microscopic hematuria           | 11103864             | FN     | HP:0002344 | Progressive neurologic deterioration | 10578411<br>19592058 | FN     |
| HP:0010628 | Facial palsy                    | 10962818<br>9621267  | FN     | HP:0000541 | Retinal detachment                   | 21563451             | FN     |
| HP:0002015 | Dysphagia                       | 17509668             | FN     | HP:0001291 | Abnormality of the cranial nerves    | 9310116              | FN     |
| HP:0005291 | Inflammatory arteriopathy       | 20609853             | FN     | HP:0011353 | Arterial intimal fibrosis            | 1807817<br>11466252  | FN     |
| HP:0000206 | Glossitis                       | 3320647              | FN     | HP:0000603 | Central scotoma                      | 7800356              | FN     |
| HP:0001917 | Renal amyloidosis               | 9058675<br>11758014  | FN     | HP:0010532 | Paroxysmal vertigo                   | 15280720             | FN     |
| HP:0000211 | Trismus                         | 16859591             | FN     | HP:0003281 | Increased serum ferritin             | 16543040             | FN     |
| HP:0007863 | Retinal lesions                 | -                    | FN     | HP:0003324 | Generalized muscle weakness          | 17340046             | FN     |
| HP:0001605 | Vocal cord paralysis            | 16854506             | FN     | HP:0000573 | Retinal hemorrhage                   | 12692357<br>11130757 | FN     |
| HP:0002318 | Cervical myelopathy             | 9367971              | FN     | HP:0002102 | Pleuritis                            | 20400261             | FN     |
| HP:0000615 | Abnormality of the pupil        | 14552190             | FN     | HP:0000790 | Hematuria                            | 2729757              | FN     |
| HP:0002625 | Deep venous thrombosis          | 11503135             | FN     | HP:0001679 | Abnormality of the aorta             | -                    | FN     |
| HP:0005794 | Arterial disease of legs        | -                    | FN     | HP:0011477 | Upbeat nystagmus                     | 6703989              | FN     |
| HP:0003547 | Shoulder girdle muscle weakness | -                    | FN     |            |                                      |                      |        |

**Table S2.** Overview of HPO annotations for **Cholesterol Embolism** that were derived by concept recognition in PubMed using BioLark. There were 18 true positives, 27 false positives, and 34 false negatives.

| ID         | Name                              | pmid                 | status | ID         | Name                                | pmid                            | status |
|------------|-----------------------------------|----------------------|--------|------------|-------------------------------------|---------------------------------|--------|
| HP:0000965 | Cutis marmorata                   | 15240205<br>22588660 | TP     | HP:0001919 | Acute kidney injury                 | 21841332                        | TP     |
| HP:0002621 | Atherosclerosis                   |                      | FP     | HP:0000083 | Renal insufficiency                 | 11358047                        | TP     |
| HP:0001880 | Eosinophilia                      | 17726656             | TP     | HP:0000822 | Hypertension                        | 8541013                         | TP     |
| HP:0001658 | Myocardial infarction             |                      | FP     | HP:0003774 | Stage 5 chronic kidney disease      | 15705188                        | TP     |
| HP:0001297 | Stroke                            |                      | FP     | HP:0002633 | Vasculitis                          | 9217601                         | TP     |
| HP:0003259 | Elevated serum creatinine         | 17634712             | TP     | HP:0001920 | Renal artery stenosis               |                                 | FP     |
| HP:0000961 | Cyanosis                          |                      | FP     | HP:0004953 | Abdominal aortic aneurysm           |                                 | FP     |
| HP:0000093 | Proteinuria                       | 9404775              | TP     | HP:0004950 | Peripheral arterial disease         |                                 | FP     |
| HP:0003326 | Myalgia                           | 16940713             | TP     | HP:0002617 | Aneurysm                            |                                 | FP     |
| HP:0002140 | Ischemic stroke                   |                      | FP     | HP:0100546 | Carotid artery stenosis             |                                 | FP     |
| HP:0000112 | Nephropathy                       |                      | FP     | HP:0000819 | Diabetes mellitus                   |                                 | FP     |
| HP:0002027 | Abdominal pain                    | 12873565             | TP     | HP:0002239 | Gastrointestinal hemorrhage         | 9404775                         | TP     |
| HP:0001677 | Coronary artery disease           |                      | FP     | HP:0004942 | Aortic aneurysm                     |                                 | FP     |
| HP:0001907 | Thromboembolism                   |                      | FP     | HP:0000979 | Purpura                             | 17695780                        | TP     |
| HP:0002586 | Peritonitis                       |                      | FP     | HP:0001635 | Congestive heart failure            |                                 | FP     |
| HP:0003077 | Hyperlipidemia                    |                      | FP     | HP:0009763 | Limb pain                           | 17695780                        | TP     |
| HP:0005110 | Atrial fibrillation               |                      | FP     | HP:0002326 | Transient ischemic attack           | 11419038                        | TP     |
| HP:0009741 | Nephrosclerosis                   |                      | FP     | HP:0004417 | Intermittent claudication           |                                 | FP     |
| HP:0001945 | Fever                             | 15705188             | TP     | HP:0100598 | Pulmonary edema                     | 12238276                        | TP     |
| HP:0003124 | Hypercholesterolemia              |                      | FP     | HP:0002635 | Atheromatosis                       |                                 | FP     |
| HP:0002583 | Colitis                           | 8669792              | TP     | HP:0002634 | Arteriosclerosis                    |                                 | FP     |
| HP:0001888 | Lymphopenia                       |                      | FP     | HP:0004406 | Spontaneous recurrent epistaxis     |                                 | FP     |
| HP:0001899 | Increased hematocrit              |                      | FP     | HP:0100758 | Gangrene                            | 21841332                        | FN     |
| HP:0001082 | Cholecystitis                     | 10429867             | FN     | HP:0002014 | Diarrhea                            | 12873565                        | FN     |
| HP:0001733 | Pancreatitis                      | 9445132              | FN     | HP:0000790 | Hematuria                           | 16430035<br>11171470            | FN     |
| HP:0001735 | Acute pancreatitis                | 11100174             | FN     | HP:0001289 | Confusion                           | 18072326                        | FN     |
| HP:0001824 | Weight loss                       | 21993354             | FN     | HP:0100576 | Amaurosis fugax                     | 21993354                        | FN     |
| HP:0002573 | Hematochezia                      | 17277861<br>15494680 | FN     | HP:0000100 | Nephrotic syndrome                  | 9041208                         | FN     |
| HP:0002157 | Azotemia                          | 20453403             | FN     | HP:0000099 | Glomerulonephritis                  | 18651554<br>12324923<br>9041208 | FN     |
| HP:0001063 | Acrocyanosis                      | 7727880<br>9235104   | FN     | HP:0006846 | Acute encephalopathy                | 17229746                        | FN     |
| HP:0011227 | Elevated C-reactive protein level | 12875753             | FN     | HP:0008682 | Acute tubular necrosis              | 12649545                        | FN     |
| HP:0200042 | Skin ulcer                        | 21946763             | FN     | HP:0100614 | Myositis                            | 11394629                        | FN     |
| HP:0000096 | Glomerulosclerosis                | 16773802             | FN     | HP:0001269 | Hemiparesis                         | 12040986                        | FN     |
| HP:0010550 | Paraplegia                        | 15515703             | FN     | HP:0001324 | Muscle weakness                     | 8121874                         | FN     |
| HP:0004325 | Decreased body weight             | 21993354             | FN     | HP:0003138 | Increased blood urea nitrogen (BUN) | 18840042                        | FN     |
| HP:0004713 | Reversible renal failure          | 12187114             | FN     | HP:0007123 | Subcortical dementia                | 15465102                        | FN     |
| HP:0002913 | Myoglobinuria                     | 18480661             | FN     | HP:0003323 | Progressive muscle weakness         | 19774498                        | FN     |
| HP:0100732 | Pancreatic fibrosis               | 9445132              | FN     | HP:0002907 | Microscopic hematuria               | 22991843                        | FN     |

*continued on the next page*

**Table S2. Cholesterol Embolism – continued**

| <b>ID</b>  | <b>Name</b>                             | <b>pmid</b> | <b>status</b> | <b>ID</b>  | <b>Name</b>   | <b>pmid</b> | <b>status</b> |
|------------|-----------------------------------------|-------------|---------------|------------|---------------|-------------|---------------|
| HP:0003565 | Elevated erythrocyte sedimentation rate | 21993354    | FN            | HP:0100282 | Acute colitis | 7806835     | FN            |
| HP:0001974 | Leukocytosis                            | 21993354    | FN            |            |               |             |               |

**Table S3.** Overview of HPO annotations for **Postphlebitic Syndrome** that were derived by concept recognition in PubMed using BioLark. There were 14 true positives, 3 false positives, and 11 false negatives.

| ID         | Name                             | pmid     | status | ID         | Name                     | pmid               | status |
|------------|----------------------------------|----------|--------|------------|--------------------------|--------------------|--------|
| HP:0002625 | Deep venous thrombosis           | 25246013 | TP     | HP:0005293 | Venous insufficiency     | 25246013           | TP     |
| HP:0002204 | Pulmonary embolism               | 19741190 | TP     | HP:0004936 | Venous thrombosis        | 19741190           | TP     |
| HP:0000969 | Edema                            | 19741190 | TP     | HP:0002619 | Varicose veins           | 10886478           | TP     |
| HP:0004831 | Recurrent thromboembolism        | 16634738 | TP     | HP:0001907 | Thromboembolism          | 19741190           | TP     |
| HP:0200042 | Skin ulcer                       | 3209615  | TP     | HP:0001004 | Lymphedema               |                    | FP     |
| HP:0004325 | Decreased body weight            |          | FP     | HP:0004418 | Thrombophlebitis         | 9377251            | TP     |
| HP:0004419 | Recurrent thrombophlebitis       | 20870815 | TP     | HP:0002624 | Venous abnormality       | 3073400            | TP     |
| HP:0010834 | Trophic changes related to pain  | 10378331 | TP     | HP:0010741 | Edema of the lower limbs | 3275807            | TP     |
| HP:0100695 | Lipedema                         |          | FP     | HP:0003394 | Muscle cramps            | 8059211            | FN     |
| HP:0001000 | Abnormality of skin pigmentation | 19741190 | FN     | HP:0004947 | Arteriovenous fistula    | 1799229<br>1285578 | FN     |
| HP:0004417 | Intermittent claudication        | 1496032  | FN     | HP:0009763 | Limb pain                | 14693168           | FN     |
| HP:0000989 | Pruritus                         | 10886478 | FN     | HP:0001785 | Ankle swelling           | 2662673            | FN     |
| HP:0004850 | Recurrent deep vein thrombosis   | 10886478 | FN     | HP:0003401 | Paresthesia              | 2130425            | FN     |
| HP:0010783 | Erythema                         | 2695441  | FN     | HP:0001977 | Abnormal thrombosis      | -                  | FN     |

**Table S4.** Overview of HPO annotations for **Pernicious Anemia** that were derived by concept recognition in PubMed using BioLark. There were 17 true positives, 40 false positives, and 7 false negatives.

| ID         | Name                             | pmid                            | status | ID         | Name                                | pmid                | status |
|------------|----------------------------------|---------------------------------|--------|------------|-------------------------------------|---------------------|--------|
| HP:0001903 | Anemia                           |                                 | FP     | HP:0005263 | Gastritis                           |                     | FP     |
| HP:0002960 | Autoimmunity                     | 4890425                         | TP     | HP:0002024 | Malabsorption                       |                     | FP     |
| HP:0001889 | Megaloblastic anemia             | 11005035                        | TP     | HP:0100570 | Carcinoid                           |                     | FP     |
| HP:0002582 | Chronic atrophic gastritis       |                                 | FP     | HP:0001980 | Megaloblastic bone marrow           | 3332113             | TP     |
| HP:0001045 | Vitiligo                         |                                 | FP     | HP:0002592 | Gastric ulcer                       |                     | FP     |
| HP:0000820 | Abnormality of the thyroid gland |                                 | FP     | HP:0002588 | Duodenal ulcer                      |                     | FP     |
| HP:0001972 | Macrocytic anemia                | 11005035                        | TP     | HP:0008207 | Primary adrenal insufficiency       |                     | FP     |
| HP:0100646 | Thyroiditis                      |                                 | FP     | HP:0001891 | Iron deficiency anemia              |                     | FP     |
| HP:0009830 | Peripheral neuropathy            | 19689867                        | TP     | HP:0002044 | Zollinger-Ellison syndrome          |                     | FP     |
| HP:0005231 | Chronic gastritis                |                                 | FP     | HP:0005219 | Absence of intrinsic factor         | 3332113             | TP     |
| HP:0000819 | Diabetes mellitus                |                                 | FP     | HP:0000872 | Hashimoto thyroiditis               |                     | FP     |
| HP:0000821 | Hypothyroidism                   |                                 | FP     | HP:0001876 | Pancytopenia                        | 18622120            | TP     |
| HP:0004313 | Hypogammaglobulinemia            | 3544232                         | TP     | HP:0004395 | Malnutrition                        |                     | FP     |
| HP:0001890 | Autoimmune hemolytic anemia      |                                 | FP     | HP:0100651 | Type I diabetes mellitus            |                     | FP     |
| HP:0005202 | Helicobacter pylori infection    |                                 | FP     | HP:0100647 | Graves disease                      |                     | FP     |
| HP:0002725 | Systemic lupus erythematosus     |                                 | FP     | HP:0002196 | Myelopathy                          | 6166087<br>435137   | TP     |
| HP:0002527 | Falls                            |                                 | FP     | HP:0001878 | Hemolytic anemia                    |                     | FP     |
| HP:0002608 | Celiac disease                   |                                 | FP     | HP:0001370 | Rheumatoid arthritis                |                     | FP     |
| HP:0002835 | Aspiration                       |                                 | FP     | HP:0001324 | Muscle weakness                     |                     | FP     |
| HP:0000726 | Dementia                         | 10367704                        | TP     | HP:0000206 | Glossitis                           | 18125798            | TP     |
| HP:0005518 | Erythrocyte macrocytosis         | 3332113                         | TP     | HP:0001973 | Autoimmune thrombocytopenia         |                     | FP     |
| HP:0010972 | Anemia of inadequate production  | 857850                          | TP     | HP:0003881 | Humeral sclerosis                   |                     | FP     |
| HP:0003473 | Fatigable weakness               |                                 | FP     | HP:0006753 | Neoplasm of the stomach             | 23216458            | TP     |
| HP:0001251 | Ataxia                           | 1648656                         | TP     | HP:0000836 | Hyperthyroidism                     |                     | FP     |
| HP:0002721 | Immunodeficiency                 |                                 | FP     | HP:0002863 | Myelodysplasia                      |                     | FP     |
| HP:0001508 | Failure to thrive                | 20404749<br>1432418<br>18454811 | TP     | HP:0001733 | Pancreatitis                        |                     | FP     |
| HP:0001873 | Thrombocytopenia                 |                                 | FP     | HP:0003401 | Paresthesia                         | 18153465            | TP     |
| HP:0011273 | Anisocytosis                     |                                 | FP     | HP:0100751 | Esophageal neoplasm                 |                     | FP     |
| HP:0002571 | Achalasia                        |                                 | FP     | HP:0001138 | Optic neuropathy                    | 15587778            | FN     |
| HP:0001271 | Polyneuropathy                   | 12975298                        | FN     | HP:0000709 | Psychosis                           | 6849439<br>20807971 | FN     |
| HP:0002403 | Positive Romberg sign            | 9658486                         | FN     | HP:0010871 | Sensory ataxia                      | 11275463            | FN     |
| HP:0003487 | Babinski sign                    | 11503492                        | FN     | HP:0004340 | Abnormality of vitamin B metabolism | 265681              | FN     |

**Table S5.** Overview of HPO annotations for **Diabetic Ketoacidosis** that were derived by concept recognition in PubMed using BioLark. There were 29 true positives, 40 false positives, and 62 false negatives.

| ID         | Name                                 | pmid     | status | ID         | Name                                 | pmid     | status |
|------------|--------------------------------------|----------|--------|------------|--------------------------------------|----------|--------|
| HP:0001953 | Diabetic ketoacidosis                | 6281619  | TP     | HP:0001993 | Ketoacidosis                         | -        | TP     |
| HP:0003074 | Hyperglycemia                        | 15460517 | TP     | HP:0001946 | Ketosis                              | -        | TP     |
| HP:0001943 | Hypoglycemia                         |          | FP     | HP:0001941 | Acidosis                             | -        | TP     |
| HP:0005974 | Episodic ketoacidosis                |          | FP     | HP:0100651 | Type I diabetes mellitus             |          | FP     |
| HP:0001942 | Metabolic acidosis                   | -        | TP     | HP:0001259 | Coma                                 | 1788182  | TP     |
| HP:0002181 | Cerebral edema                       | 20420811 | TP     | HP:0002919 | Ketonuria                            | 23357396 | TP     |
| HP:0001944 | Dehydration                          | 17632987 | TP     | HP:0005979 | Metabolic ketoacidosis               | 15095958 | TP     |
| HP:0000819 | Diabetes mellitus                    |          | FP     | HP:0003128 | Lactic acidosis                      |          | FP     |
| HP:0001733 | Pancreatitis                         |          | FP     | HP:0000855 | Insulin resistance                   |          | FP     |
| HP:0002900 | Hypokalemia                          | 16191494 | TP     | HP:0002527 | Falls                                |          | FP     |
| HP:0001513 | Obesity                              |          | FP     | HP:0001959 | Polydipsia                           | 23075084 | TP     |
| HP:0003076 | Glycosuria                           | 6331271  | TP     | HP:0001824 | Weight loss                          |          | FP     |
| HP:0002013 | Vomiting                             | 22267622 | TP     | HP:0002027 | Abdominal pain                       | 22267622 | TP     |
| HP:0002148 | Hypophosphatemia                     |          | FP     | HP:0001735 | Acute pancreatitis                   |          | FP     |
| HP:0000488 | Retinopathy                          |          | FP     | HP:0000718 | Aggressive behavior                  |          | FP     |
| HP:0002960 | Autoimmunity                         |          | FP     | HP:0009830 | Peripheral neuropathy                |          | FP     |
| HP:0005978 | Type II diabetes mellitus            |          | FP     | HP:0000112 | Nephropathy                          |          | FP     |
| HP:0001988 | Recurrent hypoglycemia               |          | FP     | HP:0009800 | Maternal diabetes                    |          | FP     |
| HP:0100806 | Sepsis                               | 9822196  | TP     | HP:0100753 | Schizophrenia                        |          | FP     |
| HP:0002017 | Nausea and vomiting                  | -        | TP     | HP:0002153 | Hyperkalemia                         | 20420664 | TP     |
| HP:0001658 | Myocardial infarction                | 822609   | TP     | HP:0001254 | Lethargy                             | 22267622 | TP     |
| HP:0100598 | Pulmonary edema                      | 6767583  | TP     | HP:0001325 | Hypoglycemic coma                    |          | FP     |
| HP:0001950 | Respiratory alkalosis                |          | FP     | HP:0000083 | Renal insufficiency                  |          | FP     |
| HP:0003201 | Rhabdomyolysis                       | 20397738 | TP     | HP:0002098 | Respiratory distress                 |          | FP     |
| HP:0001250 | Seizures                             | 15960181 | TP     | HP:0001673 | Tachycardia (with pheochromocytoma)  |          | FP     |
| HP:0011106 | Hypovolemia                          | 23283273 | TP     | HP:0002615 | Hypotension                          | 23283273 | TP     |
| HP:0001397 | Hepatic steatosis                    |          | FP     | HP:0002093 | Respiratory insufficiency            |          | FP     |
| HP:0000822 | Hypertension                         | 23283273 | TP     | HP:0001297 | Stroke                               |          | FP     |
| HP:0002344 | Progressive neurologic deterioration |          | FP     | HP:0001289 | Confusion                            | 22267622 | TP     |
| HP:0001324 | Muscle weakness                      |          | FP     | HP:0000246 | Sinusitis                            |          | FP     |
| HP:0004395 | Malnutrition                         |          | FP     | HP:0000831 | Insulin-resistant diabetes mellitus  |          | FP     |
| HP:0002039 | Anorexia                             |          | FP     | HP:0011947 | Respiratory tract infection          |          | FP     |
| HP:0002719 | Recurrent infections                 |          | FP     | HP:0004904 | Maturity-onset diabetes of the young |          | FP     |
| HP:0002018 | Nausea                               | 18520103 | TP     | HP:0006543 | Cardiorespiratory arrest             |          | FP     |
| HP:0002574 | Episodic abdominal pain              |          | FP     | HP:0004918 | hyperchloremic metabolic acidosis    | 10030094 | FN     |
| HP:0001986 | Hypertonic dehydration               | 822694   | FN     | HP:0004900 | Severe lactic acidosis               | 16791396 | FN     |
| HP:0001995 | Hyperchloremic acidosis              | 1826776  | FN     | HP:0002151 | Increased serum lactate              | 7885271  | FN     |
| HP:0008942 | Acute rhabdomyolysis                 | 14655521 | FN     | HP:0006279 | Beta-cell dysfunction                | 17599861 | FN     |
| HP:0003228 | Hypertatremia                        | 8696061  | FN     | HP:0002917 | Hypomagnesemia                       | 10224681 | FN     |
| HP:0002789 | Tachypnea                            | 19106720 | FN     | HP:0005305 | Cerebral venous thrombosis           | 21244475 | FN     |
| HP:0000103 | Polyuria                             | 22104427 | FN     | HP:0002516 | Increased intracranial pressure      | 3150280  | FN     |
| HP:0002329 | Drowsiness                           | 16489969 | FN     | HP:0002072 | Chorea                               | 21632136 | FN     |
| HP:0007185 | Loss of consciousness                | 17185803 | FN     | HP:0100537 | Fasciitis                            | 6418495  | FN     |

*continued on the next page*



**Table S5. Diabetic Ketoacidosis – continued**

| <b>ID</b>  | <b>Name</b>                              | <b>pmid</b> | <b>status</b> | <b>ID</b>  | <b>Name</b>                                 | <b>pmid</b> | <b>status</b> |
|------------|------------------------------------------|-------------|---------------|------------|---------------------------------------------|-------------|---------------|
| HP:0001278 | Orthostatic hypotension                  | 6798666     | FN            | HP:0002902 | Hyponatremia                                | 814023      | FN            |
| HP:0002883 | Hyperventilation                         | 15982426    | FN            | HP:0005521 | Disseminated intravas-<br>cular coagulation | 825399      | FN            |
| HP:0003259 | Elevated serum creati-<br>nine           | 6441297     | FN            | HP:0100724 | Hypercoagulability                          | 17380929    | FN            |
| HP:0002155 | Hypertriglyceridemia                     | 19667310    | FN            | HP:0000975 | Hyperhidrosis                               | 22356444    | FN            |
| HP:0002625 | Deep venous thrombosis                   | 22356837    | FN            | HP:0001919 | Acute kidney injury                         | 12708572    | FN            |
| HP:0001974 | Leukocytosis                             | 821284      | FN            | HP:0003077 | Hyperlipidemia                              | 22233951    | FN            |
| HP:0000093 | Proteinuria                              | 6420364     | FN            | HP:0001695 | Cardiac arrest                              | 12748130    | FN            |
| HP:0001298 | Encephalopathy                           | 20420811    | FN            | HP:0001907 | Thromboembolism                             | 19542020    | FN            |
| HP:0002014 | Diarrhea                                 | 21551959    | FN            | HP:0002637 | Cerebral ischemia                           | 23515102    | FN            |
| HP:0011675 | Arrhythmia                               | 21316179    | FN            | HP:0001939 | Abnormality of<br>metabolism/homeostasis    | -           | FN            |
| HP:0000017 | Nocturia                                 | 21381577    | FN            | HP:0001342 | Cerebral hemorrhage                         | 18039811    | FN            |
| HP:0002157 | Azotemia                                 | 22391852    | FN            | HP:0003256 | Abnormality of the coag-<br>ulation cascade | -           | FN            |
| HP:0002239 | Gastrointestinal hemor-<br>rhage         | 8565740     | FN            | HP:0004936 | Venous thrombosis                           | -           | FN            |
| HP:0003111 | Abnormality of ion<br>homeostasis        | -           | FN            | HP:0011458 | Abdominal symptom                           | -           | FN            |
| HP:0004420 | Arterial thrombosis                      | 16570569    | FN            | HP:0000737 | Irritability                                | 8685764     | FN            |
| HP:0002170 | Intracranial hemorrhage                  | 1698585     | FN            | HP:0004372 | Reduced conscious-<br>ness/confusion        | -           | FN            |
| HP:0006846 | Acute encephalopathy                     | 403389      | FN            | HP:0000217 | Xerostomia                                  | 14575617    | FN            |
| HP:0002315 | Headache                                 | 23772471    | FN            | HP:0008279 | Transient hyperlipi-<br>demia               | 11051350    | FN            |
| HP:0003113 | Hypochloremia                            | 19606251    | FN            | HP:0002641 | Peripheral thrombosis                       | 17315523    | FN            |
| HP:0100812 | Halitosis                                | -           | FN            | HP:0002905 | Hyperphosphatemia                           | 3933341     | FN            |
| HP:0000805 | Enuresis                                 | 22145453    | FN            | HP:0001262 | Somnolence                                  | 8844491     | FN            |
| HP:0000713 | Agitation                                | 16489969    | FN            | HP:0002149 | Hyperuricemia                               | 14483098    | FN            |
| HP:0004360 | Abnormality of acid-<br>base homeostasis | -           | FN            |            |                                             |             |               |

**Table S6.** Overview of HPO annotations for **Hemochromatosis** that were derived by concept recognition in PubMed using BioLark. There were 31 true positives, 68 false positives, and 14 false negatives.

| ID         | Name                                   | pmid                | status | ID         | Name                            | pmid                | status |
|------------|----------------------------------------|---------------------|--------|------------|---------------------------------|---------------------|--------|
| HP:0001394 | Cirrhosis                              | 9867745             | TP     | HP:0003281 | Increased serum ferritin        | 9422115<br>11531973 | TP     |
| HP:0001903 | Anemia                                 |                     | FP     | HP:0003040 | Arthropathy                     | 1788814             | TP     |
| HP:0001402 | Hepatocellular carcinoma               | 6282722<br>12828961 | TP     | HP:0005560 | Imbalanced hemoglobin synthesis |                     | FP     |
| HP:0001395 | Hepatic fibrosis                       | 11832443            | TP     | HP:0000135 | Hypogonadism                    |                     | FP     |
| HP:0000819 | Diabetes mellitus                      |                     | FP     | HP:0001399 | Hepatic failure                 |                     | FP     |
| HP:0001638 | Cardiomyopathy                         | 9867745             | TP     | HP:0001397 | Hepatic steatosis               |                     | FP     |
| HP:0003452 | Increased serum iron                   | 19477142            | TP     | HP:0001635 | Congestive heart failure        |                     | FP     |
| HP:0001000 | Abnormality of skin pigmentation       |                     | FP     | HP:0001369 | Arthritis                       |                     | FP     |
| HP:0002910 | Elevated hepatic transaminases         | 8094554             | TP     | HP:0001891 | Iron deficiency anemia          |                     | FP     |
| HP:0000934 | Chondrocalcinosis                      | 12117686            | TP     | HP:0006562 | Viral hepatitis                 |                     | FP     |
| HP:0009824 | Upper limb undergrowth                 |                     | FP     | HP:0000802 | Impotence                       | 19477142            | TP     |
| HP:0002896 | Neoplasm of the liver                  |                     | FP     | HP:0003365 | Arthralgia of the hip           |                     | FP     |
| HP:0002240 | Hepatomegaly                           | 24343468            | TP     | HP:0000855 | Insulin resistance              |                     | FP     |
| HP:0001410 | Decreased liver function               | 17606206            | TP     | HP:0010972 | Anemia of inadequate production |                     | FP     |
| HP:0001733 | Pancreatitis                           |                     | FP     | HP:0001924 | Sideroblastic anemia            | 4017031             | TP     |
| HP:0007354 | Amyotrophic lateral sclerosis          |                     | FP     | HP:0002613 | Biliary cirrhosis               |                     | FP     |
| HP:0100646 | Thyroiditis                            |                     | FP     | HP:0000044 | Hypogonadotropic hypogonadism   | 9867745             | TP     |
| HP:0001644 | Dilated cardiomyopathy                 | 6418103             | TP     | HP:0002829 | Arthralgia                      | 17471841            | TP     |
| HP:0011675 | Arrhythmia                             |                     | FP     | HP:0002758 | Osteoarthritis                  |                     | FP     |
| HP:0000939 | Osteoporosis                           |                     | FP     | HP:0001878 | Hemolytic anemia                |                     | FP     |
| HP:0006554 | Acute hepatic failure                  |                     | FP     | HP:0000833 | Glucose intolerance             |                     | FP     |
| HP:0002960 | Autoimmunity                           |                     | FP     | HP:0002608 | Celiac disease                  |                     | FP     |
| HP:0001409 | Portal hypertension                    | 7557861             | TP     | HP:0004810 | Congenital hypoplastic anemia   |                     | FP     |
| HP:0001541 | Ascites                                | 8867884             | TP     | HP:0001324 | Muscle weakness                 |                     | FP     |
| HP:0005505 | Refractory anemia                      |                     | FP     | HP:0001513 | Obesity                         |                     | FP     |
| HP:0001915 | Aplastic anemia                        |                     | FP     | HP:0004444 | Spherocytosis                   |                     | FP     |
| HP:0006580 | Portal fibrosis                        | 18160317            | TP     | HP:0000718 | Aggressive behavior             |                     | FP     |
| HP:0002863 | Myelodysplasia                         |                     | FP     | HP:0000952 | Jaundice                        | 19477142            | TP     |
| HP:0000821 | Hypothyroidism                         |                     | FP     | HP:0100806 | Sepsis                          |                     | FP     |
| HP:0002027 | Abdominal pain                         | 6418636             | TP     | HP:0002621 | Atherosclerosis                 |                     | FP     |
| HP:0003256 | Abnormality of the coagulation cascade |                     | FP     | HP:0001370 | Rheumatoid arthritis            |                     | FP     |
| HP:0000953 | Hyperpigmentation of the skin          | 2986052             | TP     | HP:0100544 | Neoplasm of the heart           |                     | FP     |
| HP:0001900 | Increased hemoglobin                   |                     | FP     | HP:0004870 | Chronic hemolytic anemia        |                     | FP     |
| HP:0000083 | Renal insufficiency                    |                     | FP     | HP:0001824 | Weight loss                     |                     | FP     |
| HP:0002527 | Falls                                  |                     | FP     | HP:0003231 | Hypertyrosinemia                |                     | FP     |
| HP:0011031 | Abnormality of iron homeostasis        |                     | FP     | HP:0003881 | Humeral sclerosis               |                     | FP     |
| HP:0011034 | Amyloidosis                            |                     | FP     | HP:0000938 | Osteopenia                      |                     | FP     |
| HP:0002719 | Recurrent infections                   |                     | FP     | HP:0004325 | Decreased body weight           |                     | FP     |
| HP:0000992 | Cutaneous photosensitivity             |                     | FP     | HP:0002480 | Hepatic encephalopathy          | 1936813             | TP     |
| HP:0001723 | Restrictive cardiomyopathy             | 6418103             | TP     | HP:0004377 | Hematological neoplasm          |                     | FP     |
| HP:0001943 | Hypoglycemia                           |                     | FP     | HP:0002619 | Varicose veins                  |                     | FP     |
| HP:0002511 | Alzheimer disease                      |                     | FP     | HP:0001413 | Micronodular cirrhosis          | 3909817             | TP     |
| HP:0001744 | Splenomegaly                           | 24343468            | TP     | HP:0001658 | Myocardial infarction           |                     | FP     |
| HP:0001405 | Periportal fibrosis                    | 474711              | TP     | HP:0001945 | Fever                           |                     | FP     |

*continued on the next page*

**Table S6. Hemochromatosis – continued**

| <b>ID</b>  | <b>Name</b>                   | <b>pmid</b>        | <b>status</b> | <b>ID</b>  | <b>Name</b>                     | <b>pmid</b>         | <b>status</b> |
|------------|-------------------------------|--------------------|---------------|------------|---------------------------------|---------------------|---------------|
| HP:0100523 | Liver abscess                 |                    | FP            | HP:0000740 | Anxiety (with pheochromocytoma) |                     | FP            |
| HP:0000518 | Cataract                      |                    | FP            | HP:0001254 | Lethargy                        | 16315132            | TP            |
| HP:0003073 | Hypoalbuminemia               | 9543801<br>1312985 | TP            | HP:0000829 | Hypoparathyroidism              | 7572161             | TP            |
| HP:0002611 | Cholestatic liver disease     | 9285385            | TP            | HP:0000822 | Hypertension                    |                     | FP            |
| HP:0000842 | Hyperinsulinemia              |                    | FP            | HP:0004787 | Fulminant hepatitis             |                     | FP            |
| HP:0012024 | Hypergalactosemia             |                    | FP            | HP:0000029 | Testicular atrophy              | 21549511            | FN            |
| HP:0001404 | Hepatocellular necrosis       | 20665379           | FN            | HP:0000823 | Delayed puberty                 | 8432779             | FN            |
| HP:0002749 | Osteomalacia                  | 2783312            | FN            | HP:0001433 | Hepatosplenomegaly              | 24343468            | FN            |
| HP:0000141 | Amenorrhea                    | 8867884            | FN            | HP:0000789 | Infertility                     | 7263194<br>14991275 | FN            |
| HP:0009830 | Peripheral neuropathy         | 20358215           | FN            | HP:0000771 | Gynecomastia                    | 1392425             | FN            |
| HP:0000869 | Secondary amenorrhea          | 8867884            | FN            | HP:0001387 | Joint stiffness                 | 6652983<br>19018338 | FN            |
| HP:0003155 | Elevated alkaline phosphatase | 1914539            | FN            | HP:0100769 | Synovitis                       | 19933745            | FN            |
| HP:0010788 | Testicular neoplasm           | 21549511           | FN            |            |                                 |                     |               |

**Table S7.** Overview of HPO annotations for **Anti-Glomerular Basement Membrane Disease** that were derived by concept recognition in PubMed using BioLark. There were 28 true positives, 17 false positives, and 22 false negatives.

| ID         | Name                                   | pmid     | status | ID         | Name                                     | pmid     | status |
|------------|----------------------------------------|----------|--------|------------|------------------------------------------|----------|--------|
| HP:0000099 | Glomerulonephritis                     | 7246141  | TP     | HP:0000093 | Proteinuria                              | 9453010  | TP     |
| HP:0003453 | Antineutrophil antibody positivity     | 19695059 | TP     | HP:0002960 | Autoimmunity                             | 10896942 | TP     |
| HP:0000123 | Nephritis                              | 948570   | TP     | HP:0002633 | Vasculitis                               | 9469509  | TP     |
| HP:0002105 | Hemoptysis                             | 11523135 | TP     | HP:0000083 | Renal insufficiency                      | 7246141  | TP     |
| HP:0002955 | Granulomatosis                         |          | FP     | HP:0008653 | Crescentic glomerulonephritis            | 6211894  | TP     |
| HP:0000790 | Hematuria                              | 8336406  | TP     | HP:0001919 | Acute renal failure                      | 12727586 | TP     |
| HP:0003774 | End stage renal disease                | 4011844  | TP     | HP:0002725 | Systemic lupus erythematosus             |          | FP     |
| HP:0000794 | IgA nephropathy                        |          | FP     | HP:0000112 | Nephropathy                              | 6211894  | TP     |
| HP:0002093 | Respiratory insufficiency              | 22251235 | TP     | HP:0001903 | Anemia                                   | 8431025  | TP     |
| HP:0002113 | Pulmonary infiltrates                  | 4023439  | TP     | HP:0003259 | Increased creatinine                     | 8084449  | TP     |
| HP:0000979 | Purpura                                |          | FP     | HP:0000793 | Membranoproliferative glomerulonephritis |          | FP     |
| HP:0000718 | Aggressive behavior                    |          | FP     | HP:0100520 | Oliguria                                 | 19151145 | TP     |
| HP:0003881 | Humeral sclerosis                      |          | FP     | HP:0100519 | Anuria                                   | 19151145 | TP     |
| HP:0000097 | Focal segmental glomerulosclerosis     |          | FP     | HP:0000100 | Nephrotic syndrome                       | 794860   | TP     |
| HP:0000096 | Glomerulosclerosis                     | 15496153 | TP     | HP:0001970 | Tubulointerstitial nephritis             |          | FP     |
| HP:0002907 | Microhematuria                         | 7246141  | TP     | HP:0100820 | Glomerulopathy                           | 8971896  | TP     |
| HP:0001945 | Fever                                  | 8203372  | TP     | HP:0000822 | Hypertension                             |          | FP     |
| HP:0006530 | Interstitial pulmonary disease         | 8431025  | TP     | HP:0011944 | Small vessel vasculitis                  |          | FP     |
| HP:0002157 | Azotemia                               | 16408434 | TP     | HP:0000969 | Edema                                    |          | FP     |
| HP:0001370 | Rheumatoid arthritis                   |          | FP     | HP:0003493 | Antinuclear antibody positivity          | 16767317 | TP     |
| HP:0002206 | Pulmonary fibrosis                     |          | FP     | HP:0003613 | Antiphospholipid antibody positivity     |          | FP     |
| HP:0100598 | Pulmonary edema                        |          | FP     | HP:0006535 | Recurrent intrapulmonary hemorrhage      | 3917391  | TP     |
| HP:0001973 | Autoimmune thrombocytopenia            |          | FP     | HP:0002098 | Respiratory distress                     | 9361103  | FN     |
| HP:0002094 | Dyspnea                                | 2214405  | FN     | HP:0001891 | Iron deficiency anemia                   | 8532389  | FN     |
| HP:0001250 | Seizures                               | 22251235 | FN     | HP:0005576 | Tubulointerstitial fibrosis              | 17516154 | FN     |
| HP:0002875 | Exertional dyspnea                     | 10496107 | FN     | HP:0001880 | Eosinophilia                             | 12955709 | FN     |
| HP:0001897 | Normocytic anemia                      | 16894954 | FN     | HP:0000622 | Blurred vision                           | 8409194  | FN     |
| HP:0005521 | Disseminated intravascular coagulation | 10087878 | FN     | HP:0003326 | Myalgia                                  | 8203372  | FN     |
| HP:0001342 | Cerebral hemorrhage                    | 9355084  | FN     | HP:0000541 | Retinal detachment                       | 8409194  | FN     |
| HP:0002039 | Anorexia                               | 8820507  | FN     | HP:0000821 | Hypothyroidism                           | 10720217 | FN     |
| HP:0007898 | Exudative retinopathy                  | 8409194  | FN     | HP:0200029 | Vasculitis in the skin                   | 3184080  | FN     |
| HP:0001935 | Microcytic anemia                      | 10502944 | FN     | HP:0003075 | Hypoproteinemia                          | 10502944 | FN     |
| HP:0000121 | Nephrocalcinosis                       | 930188   | FN     | HP:0003324 | Generalized muscle weakness              | 10750432 | FN     |
| HP:0001954 | Episodic fever                         | 23515881 | FN     |            |                                          |          |        |

**Table S8.** Overview of HPO annotations for **Common Variable Immunodeficiency** that were derived by concept recognition in PubMed using BioLark. There were 42 true positives, 27 false positives, and 32 false negatives.

| ID         | Name                                              | pmid     | status | ID         | Name                                         | pmid     | status |
|------------|---------------------------------------------------|----------|--------|------------|----------------------------------------------|----------|--------|
| HP:0002721 | Immunodeficiency                                  | -        | TP     | HP:0004313 | Hypogammaglobulinemia                        | 19671377 | TP     |
| HP:0002960 | Autoimmunity                                      |          | FP     | HP:0002719 | Recurrent infections                         | -        | TP     |
| HP:0004432 | Agammaglobulinemia                                |          | FP     | HP:0002718 | Recurrent bacterial infections               | 11861266 | TP     |
| HP:0002720 | IgA deficiency                                    | 22983507 | TP     | HP:0002110 | Bronchiectasis                               | 20635788 | TP     |
| HP:0004315 | IgG deficiency                                    | 20434118 | TP     | HP:0001744 | Splenomegaly                                 | 9822285  | TP     |
| HP:0002205 | Recurrent respiratory infections                  | 16794375 | TP     | HP:0011947 | Respiratory tract infection                  |          | FP     |
| HP:0002843 | Abnormality of T cells                            | 10993290 | TP     | HP:0002665 | Lymphoma                                     | 20332369 | TP     |
| HP:0002958 | Immune dysregulation                              | 19671377 | TP     | HP:0005425 | Recurrent sinopulmonary infections           | 20402074 | TP     |
| HP:0002090 | Pneumonia                                         | -        | TP     | HP:0002850 | IgM deficiency                               | 23379434 | TP     |
| HP:0001973 | Autoimmune thrombocytopenia                       | 19716342 | TP     | HP:0002028 | Chronic diarrhea                             | 17629033 | TP     |
| HP:0002024 | Malabsorption                                     | 15248108 | TP     | HP:0001890 | Autoimmune hemolytic anemia                  | 19671377 | TP     |
| HP:0006532 | Recurrent pneumonia                               | 12709641 | TP     | HP:0005479 | IgE deficiency                               |          | FP     |
| HP:0005523 | Lymphoproliferative disorder                      | 17601274 | TP     | HP:0001888 | Lymphopenia                                  | 12165093 | TP     |
| HP:0002242 | Abnormality of the intestine                      |          | FP     | HP:0005435 | Impaired T cell function                     | 8050170  | TP     |
| HP:0001903 | Anemia                                            | 16789508 | TP     | HP:0002014 | Diarrhea                                     |          | FP     |
| HP:0004430 | Severe combined immunodeficiency                  |          | FP     | HP:0006530 | Interstitial pulmonary disease               | 22930256 | TP     |
| HP:0002037 | Inflammation of the large intestine               |          | FP     | HP:0002608 | Celiac disease                               |          | FP     |
| HP:0000246 | Sinusitis                                         | 18419489 | TP     | HP:0001873 | Thrombocytopenia                             |          | FP     |
| HP:0010702 | Hypergammaglobulinemia                            |          | FP     | HP:0011473 | Villous atrophy                              | 14550517 | TP     |
| HP:0003095 | Septic arthritis                                  | 8945717  | TP     | HP:0005365 | Severe B lymphocytopenia                     | 8027379  | TP     |
| HP:0002846 | Abnormality of B cells                            | 17521034 | TP     | HP:0002099 | Asthma                                       |          | FP     |
| HP:0004798 | Recurrent infection of the gastrointestinal tract | 18953945 | TP     | HP:0001875 | Neutropenia                                  | 17165275 | TP     |
| HP:0006528 | Chronic lung disease                              | 22180439 | TP     | HP:0001945 | Fever                                        | 17165275 | TP     |
| HP:0001370 | Rheumatoid arthritis                              | 19671377 | TP     | HP:0005357 | Defective B cell differentiation             | 23714403 | TP     |
| HP:0003237 | Increased IgG level                               |          | FP     | HP:0002783 | Recurrent lower respiratory tract infections | 12164371 | TP     |
| HP:0000979 | Purpura                                           | 19671377 | TP     | HP:0011108 | Recurrent sinusitis                          | 15005811 | TP     |
| HP:0001009 | Telangiectasia                                    |          | FP     | HP:0000388 | Otitis media                                 | 19230900 | TP     |
| HP:0001399 | Hepatic failure                                   |          | FP     | HP:0006515 | Interstitial pneumonitis                     |          | FP     |
| HP:0001251 | Ataxia                                            |          | FP     | HP:0100280 | Crohn's disease                              |          | FP     |
| HP:0006527 | Lymphoid interstitial pneumonia                   | 12709641 | TP     | HP:0002583 | Colitis                                      |          | FP     |
| HP:0003139 | Panhypogammaglobulinemia                          |          | FP     | HP:0100827 | Lymphocytosis                                | 17194667 | TP     |
| HP:0005432 | Transient hypogammaglobulinemia of infancy        |          | FP     | HP:0002961 | Dysgammaglobulinemia                         |          | FP     |
| HP:0003496 | Increased IgM level                               |          | FP     | HP:0011950 | Bronchiolitis                                |          | FP     |
| HP:0010701 | Abnormal immunoglobulin level                     |          | FP     | HP:0010977 | Abnormality of phagocytes                    |          | FP     |
| HP:0002209 | Sparse scalp hair                                 |          | FP     | HP:0002729 | Follicular hyperplasia                       | 18054123 | FN     |
| HP:0011109 | Chronic sinusitis                                 | 16252205 | FN     | HP:0001433 | Hepatosplenomegaly                           | 17601274 | FN     |
| HP:0200043 | Verrucae                                          | 17902733 | FN     | HP:0005681 | Juvenile rheumatoid arthritis                | 17671947 | FN     |
| HP:0002955 | Granulomatosis                                    | 16413828 | FN     | HP:0005387 | Combined immunodeficiency                    | 11514920 | FN     |
| HP:0001876 | Pancytopenia                                      | 22413915 | FN     | HP:0001878 | Hemolytic anemia                             | 19716342 | FN     |

*continued on the next page*

**Table S8. Common Variable Immunodeficiency – continued**

| <b>ID</b>  | <b>Name</b>                          | <b>pmid</b>                                              | <b>status</b> | <b>ID</b>  | <b>Name</b>                                  | <b>pmid</b>                      | <b>status</b> |
|------------|--------------------------------------|----------------------------------------------------------|---------------|------------|----------------------------------------------|----------------------------------|---------------|
| HP:0000554 | Uveitis                              | 22506485                                                 | FN            | HP:0002788 | Recurrent upper respiratory tract infections | 18419489                         | FN            |
| HP:0001409 | Portal hypertension                  | 23420139                                                 | FN            | HP:0001581 | Recurrent skin infections                    | 19419461                         | FN            |
| HP:0005263 | Gastritis                            | 8228799                                                  | FN            | HP:0002716 | Lymphadenopathy                              | 17556024                         | FN            |
| HP:0100279 | Ulcerative colitis                   | 16329682                                                 | FN            | HP:0002633 | Vasculitis                                   | 10682991                         | FN            |
| HP:0002725 | Systemic lupus erythematosus         | 19671377                                                 | FN            | HP:0001287 | Meningitis                                   | 15513403                         | FN            |
| HP:0001369 | Arthritis                            | 19326121<br>16909702<br>15875533<br>21776287<br>17671947 | FN            | HP:0005419 | Decreased T cell activation                  | 19671377                         | FN            |
| HP:0005390 | Recurrent opportunistic infections   | -                                                        | FN            | HP:0001904 | Autoimmune neutropenia                       | 16127007                         | FN            |
| HP:0100721 | Mediastinal lymphadenopathy          | 20635788                                                 | FN            | HP:0001045 | Vitiligo                                     | 21139556                         | FN            |
| HP:0000010 | Recurrent urinary tract infections   | -                                                        | FN            | HP:0100646 | Thyroiditis                                  | 19671377                         | FN            |
| HP:0010976 | B lymphocytopenia                    | 8027379                                                  | FN            | HP:0100537 | Fasciitis                                    | 11809601<br>23129076<br>22575775 | FN            |
| HP:0006946 | Recurrent meningitis                 | 15591667                                                 | FN            | HP:0003613 | Antiphospholipid antibody positivity         | 20635793<br>21776287             | FN            |
| HP:0011117 | Abnormality of interleukin secretion | 7586680                                                  | FN            |            |                                              |                                  |               |

**Table S9.** Overview of HPO annotations for **Biliary Liver Cirrhosis** that were derived by concept recognition in PubMed using BioLark. There were 32 true positives, 40 false positives, and 34 false negatives.

| ID         | Name                                      | pmid     | status | ID         | Name                             | pmid     | status |
|------------|-------------------------------------------|----------|--------|------------|----------------------------------|----------|--------|
| HP:0002613 | Biliary cirrhosis                         | 6896227  | TP     | HP:0001394 | Cirrhosis                        | -        | TP     |
| HP:0001396 | Cholestasis                               | 7082202  | TP     | HP:0002611 | Cholestatic liver disease        | 15560038 | TP     |
| HP:0000989 | Pruritus                                  | 22259000 | TP     | HP:0000952 | Jaundice                         | 4743495  | TP     |
| HP:0001409 | Portal hypertension                       | 7091126  | TP     | HP:0001399 | Hepatic failure                  | 15560038 | TP     |
| HP:0003493 | Antinuclear antibody positivity           | 3894432  | TP     | HP:0006562 | Viral hepatitis                  |          | FP     |
| HP:0001541 | Ascites                                   | 20606498 | TP     | HP:0003155 | Elevated alkaline phosphatase    | 17918011 | TP     |
| HP:0002619 | Varicose veins                            |          | FP     | HP:0001402 | Hepatocellular carcinoma         | 15560042 | TP     |
| HP:0001395 | Hepatic fibrosis                          | 22042492 | TP     | HP:0001406 | Intrahepatic cholestasis         |          | FP     |
| HP:0005912 | Biliary atresia                           |          | FP     | HP:0002725 | Systemic lupus erythematosus     |          | FP     |
| HP:0001397 | Hepatic steatosis                         |          | FP     | HP:0002040 | Esophageal varices               | 1085267  | TP     |
| HP:0000939 | Osteoporosis                              | 14594136 | TP     | HP:0001370 | Rheumatoid arthritis             |          | FP     |
| HP:0002910 | Elevated hepatic transaminases            | 15560032 | TP     | HP:0100324 | Scleroderma                      | 17294883 | TP     |
| HP:0003881 | Humeral sclerosis                         |          | FP     | HP:0001410 | Decreased liver function         | -        | TP     |
| HP:0006580 | Portal fibrosis                           |          | FP     | HP:0001081 | Cholelithiasis                   |          | FP     |
| HP:0100279 | Ulcerative colitis                        |          | FP     | HP:0000938 | Osteopenia                       | 7659915  | TP     |
| HP:0001408 | Bile duct proliferation                   | 8778189  | TP     | HP:0002480 | Hepatic encephalopathy           | 21641685 | TP     |
| HP:0002240 | Hepatomegaly                              | 21989789 | TP     | HP:0010702 | Hypergammaglobulinemia           |          | FP     |
| HP:0002749 | Osteomalacia                              |          | FP     | HP:0001324 | Muscle weakness                  |          | FP     |
| HP:0002608 | Celiac disease                            |          | FP     | HP:0001369 | Arthritis                        |          | FP     |
| HP:0100646 | Thyroiditis                               |          | FP     | HP:0002527 | Falls                            |          | FP     |
| HP:0000820 | Abnormality of the thyroid gland          |          | FP     | HP:0000872 | Hashimoto thyroiditis            |          | FP     |
| HP:0002239 | Gastrointestinal hemorrhage               |          | FP     | HP:0011838 | Sclerodactyly                    |          | FP     |
| HP:0000718 | Aggressive behavior                       |          | FP     | HP:0000969 | Edema                            |          | FP     |
| HP:0003124 | Hypercholesterolemia                      | 4030709  | TP     | HP:0003573 | Increased total bilirubin        |          | FP     |
| HP:0000010 | Recurrent urinary tract infections        |          | FP     | HP:0100512 | Vitamin D deficiency             | 73950    | TP     |
| HP:0003453 | Antineutrophil antibody positivity        |          | FP     | HP:0001000 | Abnormality of skin pigmentation |          | FP     |
| HP:0000991 | Xanthomatosis                             | 4346939  | TP     | HP:0001945 | Fever                            |          | FP     |
| HP:0000083 | Renal insufficiency                       |          | FP     | HP:0003365 | Arthralgia of the hip            |          | FP     |
| HP:0001009 | Telangiectasia                            | 12356109 | TP     | HP:0001947 | Renal tubular acidosis           | 5548562  | TP     |
| HP:0100513 | Vitamin E deficiency                      | 2910763  | TP     | HP:0003765 | Psoriasis                        |          | FP     |
| HP:0003077 | Hyperlipidemia                            |          | FP     | HP:0001045 | Vitiligo                         | 16481294 | TP     |
| HP:0004448 | Fulminant hepatic failure                 |          | FP     | HP:0000093 | Proteinuria                      |          | FP     |
| HP:0011892 | Vitamin K deficiency                      | 11569705 | TP     | HP:0000819 | Diabetes mellitus                |          | FP     |
| HP:0000855 | Insulin resistance                        |          | FP     | HP:0003259 | Increased creatinine             |          | FP     |
| HP:0001954 | Episodic fever                            |          | FP     | HP:0003073 | Hypoalbuminemia                  | 16181370 | TP     |
| HP:0000988 | Skin rash                                 | 17060877 | TP     | HP:0003149 | Hyperuricosuria                  |          | FP     |
| HP:0011954 | Nodular regenerative hyperplasia of liver | 2583572  | FN     | HP:0001114 | Xanthelasma                      | 1420396  | FN     |
| HP:0003496 | Increased IgM level                       | 14987744 | FN     | HP:0008341 | Distal renal tubular acidosis    | 15610460 | FN     |
| HP:0001404 | Hepatocellular necrosis                   | 1882800  | FN     | HP:0002570 | Steatorrhea                      | 2411648  | FN     |
| HP:0008151 | Prolonged prothrombin time                | 20856137 | FN     | HP:0004315 | IgG deficiency                   | 21645440 | FN     |
| HP:0011473 | Villous atrophy                           | 9412913  | FN     | HP:0001097 | Keratoconjunctivitis sicca       | 15539725 | FN     |

*continued on the next page*

**Table S9. Biliary Liver Cirrhosis – continued**

| <b>ID</b>  | <b>Name</b>                  | <b>pmid</b>                  | <b>status</b> | <b>ID</b>  | <b>Name</b>                       | <b>pmid</b>          | <b>status</b> |
|------------|------------------------------|------------------------------|---------------|------------|-----------------------------------|----------------------|---------------|
| HP:0003761 | Calcinosis                   | 12356109                     | FN            | HP:0002958 | Immune dysregulation              | 22135136             | FN            |
| HP:0001970 | Tubulointerstitial nephritis | 17294883<br>20466658         | FN            | HP:0001262 | Somnolence                        | 18237872             | FN            |
| HP:0002653 | Bone pain                    | 8878772                      | FN            | HP:0001254 | Lethargy                          | 15456326             | FN            |
| HP:0001433 | Hepatosplenomegaly           | 6324495                      | FN            | HP:0002756 | Pathologic fracture               | 20926953             | FN            |
| HP:0002459 | Dysautonomia                 | 19602135                     | FN            | HP:0100614 | Myositis                          | 15287510<br>23553600 | FN            |
| HP:0001973 | Autoimmune thrombocytopenia  | 4054707<br>8680553           | FN            | HP:0002904 | Hyperbilirubinemia                | 11206871             | FN            |
| HP:0002757 | Recurrent fractures          | 17087953                     | FN            | HP:0006554 | Acute hepatic failure             | 17657817             | FN            |
| HP:0002024 | Malabsorption                | 7429337                      | FN            | HP:0001880 | Eosinophilia                      | 8633501              | FN            |
| HP:0002039 | Anorexia                     | 4030709                      | FN            | HP:0002027 | Abdominal pain                    | 7942679              | FN            |
| HP:0001824 | Weight loss                  | 9820402                      | FN            | HP:0003262 | Smooth muscle antibody positivity | 7549131              | FN            |
| HP:0002630 | Fat malabsorption            | 3335317                      | FN            | HP:0006577 | Macronodular cirrhosis            | 6217390              | FN            |
| HP:0200032 | Kayser-Fleischer ring        | 842986<br>8458236<br>1150026 | FN            | HP:0100759 | Clubbing of fingers               | 7227854              | FN            |



**Table S10.** Overview of HPO annotations for **Dermatomyositis** that were derived by concept recognition in PubMed using BioLark. There were 39 true positives, 80 false positives, and 19 false negatives.

| ID         | Name                                          | pmid     | status | ID         | Name                                  | pmid     | status |
|------------|-----------------------------------------------|----------|--------|------------|---------------------------------------|----------|--------|
| HP:0100614 | Myositis                                      | 4753878  | TP     | HP:0009071 | Inflammatory myopathy                 | 9438396  | TP     |
| HP:0006530 | Interstitial pulmonary disease                | 23117947 | TP     | HP:0002725 | Systemic lupus erythematosus          |          | FP     |
| HP:0001324 | Muscle weakness                               |          | FP     | HP:0003761 | Calcinosis                            | 7017918  | TP     |
| HP:0100324 | Scleroderma                                   |          | FP     | HP:0003701 | Proximal muscle weakness              | 9438396  | TP     |
| HP:0003198 | Myopathy                                      |          | FP     | HP:0003881 | Humeral sclerosis                     |          | FP     |
| HP:0010783 | Erythema                                      | 23117947 | TP     | HP:0002633 | Vasculitis                            | 1845413  | TP     |
| HP:0003493 | Antinuclear antibody positivity               | 6787993  | TP     | HP:0001370 | Rheumatoid arthritis                  |          | FP     |
| HP:0000988 | Skin rash                                     | 1767082  | TP     | HP:0001369 | Arthritis                             | 23117947 | TP     |
| HP:0003326 | Myalgia                                       | 11003943 | TP     | HP:0002015 | Dysphagia                             |          | FP     |
| HP:0002206 | Pulmonary fibrosis                            |          | FP     | HP:0005681 | Juvenile rheumatoid arthritis         |          | FP     |
| HP:0001945 | Fever                                         |          | FP     | HP:0000718 | Aggressive behavior                   |          | FP     |
| HP:0006515 | Interstitial pneumonitis                      | 16328018 | TP     | HP:0002093 | Respiratory insufficiency             |          | FP     |
| HP:0003560 | Muscular dystrophy                            |          | FP     | HP:0003236 | Elevated serum creatine phosphokinase |          | FP     |
| HP:0000969 | Edema                                         |          | FP     | HP:0000964 | Eczema                                |          | FP     |
| HP:0003202 | Amyotrophy                                    |          | FP     | HP:0200042 | Skin ulcer                            | 17572631 | TP     |
| HP:0003473 | Fatigable weakness                            |          | FP     | HP:0001009 | Telangiectasia                        | 1845413  | TP     |
| HP:0003323 | Progressive muscle weakness                   | 11359403 | TP     | HP:0001371 | Flexion contracture                   | 23117947 | TP     |
| HP:0008978 | Necrotizing myopathy                          |          | FP     | HP:0002090 | Pneumonia                             |          | FP     |
| HP:0002665 | Lymphoma                                      |          | FP     | HP:0100539 | Periorbital edema                     | 9557787  | TP     |
| HP:0011945 | Bronchiolitis obliterans organizing pneumonia | 1246203  | TP     | HP:0002094 | Dyspnea                               |          | FP     |
| HP:0003365 | Arthralgia of the hip                         |          | FP     | HP:0002861 | Malignant melanoma                    |          | FP     |
| HP:0000989 | Pruritus                                      | 23112358 | TP     | HP:0100615 | Ovarian neoplasm                      |          | FP     |
| HP:0003765 | Psoriasis                                     |          | FP     | HP:0100633 | Esophagitis                           |          | FP     |
| HP:0000956 | Acanthosis nigricans                          |          | FP     | HP:0003805 | Rimmed vacuoles                       |          | FP     |
| HP:0005059 | arthralgia/arthritis                          | 3977973  | TP     | HP:0000992 | Cutaneous photosensitivity            | 15379871 | TP     |
| HP:0007430 | Generalized edema                             | 18984850 | TP     | HP:0001029 | Poikiloderma                          | 23112358 | TP     |
| HP:0002097 | Emphysema                                     |          | FP     | HP:0002829 | Arthralgia                            | 23117947 | TP     |
| HP:0001888 | Lymphopenia                                   |          | FP     | HP:0000979 | Purpura                               |          | FP     |
| HP:0003002 | Breast carcinoma                              |          | FP     | HP:0011951 | Aspiration pneumonia                  |          | FP     |
| HP:0001041 | Facial erythema                               | 17215624 | TP     | HP:0001973 | Autoimmune thrombocytopenia           |          | FP     |
| HP:0100537 | Fasciitis                                     | 15197005 | TP     | HP:0003457 | EMG abnormality                       | 15693592 | TP     |
| HP:0011123 | Inflammatory abnormality of the skin          |          | FP     | HP:0002955 | Granulomatosis                        |          | FP     |
| HP:0007417 | Discoid lupus erythematosus                   |          | FP     | HP:0007354 | Amyotrophic lateral sclerosis         |          | FP     |
| HP:0002721 | Immunodeficiency                              |          | FP     | HP:0009073 | Progressive proximal muscle weakness  | 16132164 | TP     |
| HP:0009125 | Lipodystrophy                                 | 22044089 | TP     | HP:0001482 | Subcutaneous nodules                  |          | FP     |
| HP:0003324 | Generalized muscle weakness                   | 16866067 | TP     | HP:0003713 | Muscle fiber necrosis                 | 1423335  | TP     |
| HP:0000951 | Abnormality of the skin                       |          | FP     | HP:0200029 | Vasculitis in the skin                | 18981641 | TP     |
| HP:0002092 | Pulmonary hypertension                        |          | FP     | HP:0007618 | Subcutaneous calcification            | 8687325  | TP     |
| HP:0100646 | Thyroiditis                                   |          | FP     | HP:0001596 | Alopecia                              | 23112358 | TP     |
| HP:0002875 | Exertional dyspnea                            |          | FP     | HP:0002835 | Aspiration                            |          | FP     |
| HP:0001289 | Confusion                                     |          | FP     | HP:0003750 | Increased muscle fatiguability        | 17907213 | TP     |
| HP:0003259 | Increased creatinine                          |          | FP     | HP:0002027 | Abdominal pain                        |          | FP     |
| HP:0000998 | Hypertrichosis                                |          | FP     | HP:0011675 | Arrhythmia                            |          | FP     |
| HP:0002613 | Biliary cirrhosis                             |          | FP     | HP:0001271 | Polyneuropathy                        |          | FP     |

*continued on the next page*

**Table S10. Dermatomyositis – continued**

| ID         | Name                                    | pmid                 | status | ID         | Name                                             | pmid     | status |
|------------|-----------------------------------------|----------------------|--------|------------|--------------------------------------------------|----------|--------|
| HP:0003565 | Elevated erythrocyte sedimentation rate | 2334184              | TP     | HP:0002107 | Pneumothorax                                     |          | FP     |
| HP:0000083 | Renal insufficiency                     |                      | FP     | HP:0002747 | Respiratory insufficiency due to muscle weakness | 16386077 | TP     |
| HP:0000093 | Proteinuria                             |                      | FP     | HP:0001824 | Weight loss                                      |          | FP     |
| HP:0001618 | Dysphonia                               | 23042610<br>16467366 | TP     | HP:0001047 | Atopic dermatitis                                |          | FP     |
| HP:0000939 | Osteoporosis                            |                      | FP     | HP:0001903 | Anemia                                           |          | FP     |
| HP:0001880 | Eosinophilia                            |                      | FP     | HP:0005523 | Lymphoproliferative disorder                     |          | FP     |
| HP:0003756 | Skeletal myopathy                       | 15196172             | TP     | HP:0001878 | Hemolytic anemia                                 |          | FP     |
| HP:0010702 | Hypergammaglobulinemia                  |                      | FP     | HP:0007269 | Spinal muscular atrophy                          |          | FP     |
| HP:0006532 | Recurrent pneumonia                     |                      | FP     | HP:0002098 | Respiratory distress                             |          | FP     |
| HP:0003700 | Generalized amyotrophy                  |                      | FP     | HP:0002863 | Myelodysplasia                                   |          | FP     |
| HP:0006775 | Multiple myeloma                        |                      | FP     | HP:0004432 | Agammaglobulinemia                               |          | FP     |
| HP:0004313 | Hypogammaglobulinemia                   |                      | FP     | HP:0003458 | EMG: myopathic abnormalities                     |          | FP     |
| HP:0003715 | Myofibrillar myopathy                   |                      | FP     | HP:0001597 | Abnormality of the nail                          |          | FP     |
| HP:0008942 | Acute rhabdomyolysis                    |                      | FP     | HP:0000158 | Macroglossia                                     |          | FP     |
| HP:0002249 | Melena                                  |                      | FP     | HP:0005781 | Contractures of the large joints                 |          | FP     |
| HP:0007126 | Proximal amyotrophy                     |                      | FP     | HP:0100540 | Palpebral edema                                  | 12325332 | FN     |
| HP:0100295 | Muscle fiber atrophy                    | 23112358             | FN     | HP:0002460 | Distal muscle weakness                           | 18203322 | FN     |
| HP:0002792 | Reduced vital capacity                  | 15692974             | FN     | HP:0100578 | Lipoatrophy                                      | 8436656  | FN     |
| HP:0003546 | Exercise intolerance                    | 21106107             | FN     | HP:0002923 | Rheumatoid factor positive                       | 6965409  | FN     |
| HP:0001685 | Myocardial fibrosis                     | 4081664              | FN     | HP:0002102 | Pleuritis                                        | 3813671  | FN     |
| HP:0000962 | Hyperkeratosis                          | 17215624             | FN     | HP:0003453 | Antineutrophil antibody positivity               | 21812362 | FN     |
| HP:0008064 | Ichthyosiform abnormality of the skin   | 22515579             | FN     | HP:0001701 | Pericarditis                                     | 8444002  | FN     |
| HP:0010766 | Ectopic calcification                   | 18448482             | FN     | HP:0002960 | Autoimmunity                                     | 23117947 | FN     |
| HP:0100249 | Calcification of muscles                | 8814715              | FN     | HP:0200044 | Porokeratosis                                    | 17173828 | FN     |
| HP:0000965 | Cutis marmorata                         | 9731966<br>1845403   | FN     | HP:0001019 | Erythroderma                                     | 8814715  | FN     |

**Table S11.** Overview of HPO annotations for **Osteoporosis** that were derived by concept recognition in PubMed using BioLark. There were 18 true positives, 109 false positives, and 14 false negatives.

| ID         | Name                                  | pmid                                                     | status | ID         | Name                                  | pmid     | status |
|------------|---------------------------------------|----------------------------------------------------------|--------|------------|---------------------------------------|----------|--------|
| HP:0000939 | Osteoporosis                          | 6918601                                                  | TP     | HP:0000938 | Osteopenia                            | 10531790 | TP     |
| HP:0002757 | Recurrent fractures                   | 10100933<br>15560040<br>21394493<br>12810179<br>12815335 | TP     | HP:0005897 | Severe osteoporosis                   | -        | TP     |
| HP:0002953 | Vertebral compression fractures       | 7083689                                                  | TP     | HP:0011001 | Increased bone mineral density        |          | FP     |
| HP:0002527 | Falls                                 |                                                          | FP     | HP:0002797 | Osteolysis                            |          | FP     |
| HP:0002659 | Increased susceptibility to fractures | 11866149                                                 | TP     | HP:0001370 | Rheumatoid arthritis                  |          | FP     |
| HP:0100512 | Vitamin D deficiency                  |                                                          | FP     | HP:0002749 | Osteomalacia                          | -        | TP     |
| HP:0000135 | Hypogonadism                          |                                                          | FP     | HP:0010885 | Aseptic necrosis                      |          | FP     |
| HP:0003418 | Back pain                             | 10197021                                                 | TP     | HP:0002756 | Pathologic fracture                   |          | FP     |
| HP:0002758 | Osteoarthritis                        |                                                          | FP     | HP:0000867 | Secondary hyperparathyroidism         |          | FP     |
| HP:0003002 | Breast carcinoma                      |                                                          | FP     | HP:0003072 | Hypercalcemia                         |          | FP     |
| HP:0001324 | Muscle weakness                       |                                                          | FP     | HP:0002808 | Kyphosis                              | 19640824 | TP     |
| HP:0100787 | Prostate neoplasm                     |                                                          | FP     | HP:0001513 | Obesity                               |          | FP     |
| HP:0002150 | Hypercalciuria                        |                                                          | FP     | HP:0004325 | Decreased body weight                 |          | FP     |
| HP:0008200 | Primary hyperparathyroidism           |                                                          | FP     | HP:0002037 | Inflammation of the large intestine   |          | FP     |
| HP:0000819 | Diabetes mellitus                     |                                                          | FP     | HP:0003978 | Fractured radius                      | 7083689  | TP     |
| HP:0000141 | Amenorrhea                            |                                                          | FP     | HP:0000843 | Hyperparathyroidism                   |          | FP     |
| HP:0002653 | Bone pain                             |                                                          | FP     | HP:0002024 | Malabsorption                         |          | FP     |
| HP:0002039 | Anorexia                              |                                                          | FP     | HP:0004395 | Malnutrition                          |          | FP     |
| HP:0001824 | Weight loss                           |                                                          | FP     | HP:0000822 | Hypertension                          |          | FP     |
| HP:0100646 | Thyroiditis                           |                                                          | FP     | HP:0100280 | Crohn's disease                       |          | FP     |
| HP:0006775 | Multiple myeloma                      |                                                          | FP     | HP:0000836 | Hyperthyroidism                       |          | FP     |
| HP:0007354 | Amyotrophic lateral sclerosis         |                                                          | FP     | HP:0000704 | Periodontitis                         |          | FP     |
| HP:0001297 | Stroke                                |                                                          | FP     | HP:0003419 | Low back pain                         | 22338309 | TP     |
| HP:0001578 | Hypercortisolism                      |                                                          | FP     | HP:0006510 | Chronic obstructive pulmonary disease |          | FP     |
| HP:0002901 | Hypocalcemia                          |                                                          | FP     | HP:0002621 | Atherosclerosis                       |          | FP     |
| HP:0008443 | Spinal deformities                    |                                                          | FP     | HP:0002608 | Celiac disease                        |          | FP     |
| HP:0005625 | Osteoporosis of vertebrae             | -                                                        | TP     | HP:0002099 | Asthma                                |          | FP     |
| HP:0000969 | Edema                                 |                                                          | FP     | HP:0003155 | Elevated alkaline phosphatase         | 7083689  | TP     |
| HP:0002960 | Autoimmunity                          |                                                          | FP     | HP:0002063 | Rigidity                              |          | FP     |
| HP:0000083 | Renal insufficiency                   |                                                          | FP     | HP:0002725 | Systemic lupus erythematosus          |          | FP     |
| HP:0000787 | Nephrolithiasis                       |                                                          | FP     | HP:0003774 | End stage renal disease               |          | FP     |
| HP:0003869 | Cortical thinning (humeral)           | 1281535                                                  | TP     | HP:0100279 | Ulcerative colitis                    |          | FP     |
| HP:0001903 | Anemia                                |                                                          | FP     | HP:0001510 | Growth delay                          |          | FP     |
| HP:0008422 | Vertebral wedging                     | 18395504                                                 | TP     | HP:0004324 | Increased body weight                 |          | FP     |
| HP:0002613 | Biliary cirrhosis                     |                                                          | FP     | HP:0004934 | Vascular calcification                |          | FP     |
| HP:0003077 | Hyperlipidemia                        |                                                          | FP     | HP:0004349 | Reduced bone mineral density          | 16265206 | TP     |
| HP:0001289 | Confusion                             |                                                          | FP     | HP:0001394 | Cirrhosis                             |          | FP     |
| HP:0004789 | Lactose intolerance                   |                                                          | FP     | HP:0000726 | Dementia                              |          | FP     |
| HP:0100495 | Mastocytosis                          |                                                          | FP     | HP:0001250 | Seizures                              |          | FP     |
| HP:0000870 | Prolactin excess                      |                                                          | FP     | HP:0000855 | Insulin resistance                    |          | FP     |
| HP:0000024 | Prostatitis                           |                                                          | FP     | HP:0002511 | Alzheimer disease                     |          | FP     |
| HP:0000718 | Aggressive behavior                   |                                                          | FP     | HP:0001907 | Thromboembolism                       |          | FP     |
| HP:0000829 | Hypoparathyroidism                    |                                                          | FP     | HP:0004322 | Short stature                         |          | FP     |
| HP:0000708 | Behavioural/Psychiatric Abnormality   |                                                          | FP     | HP:0003202 | Amyotrophy                            |          | FP     |
| HP:0000821 | Hypothyroidism                        |                                                          | FP     | HP:0001635 | Congestive heart failure              |          | FP     |
| HP:0000740 | Anxiety (with pheochromocytoma)       |                                                          | FP     | HP:0003470 | Paralysis                             |          | FP     |
| HP:0001300 | Parkinsonism                          |                                                          | FP     | HP:0003259 | Increased creatinine                  |          | FP     |
| HP:0002611 | Cholestatic liver disease             |                                                          | FP     | HP:0100544 | Neoplasm of the heart                 |          | FP     |
| HP:0000737 | Irritability                          |                                                          | FP     | HP:0000823 | Delayed puberty                       |          | FP     |
| HP:0100543 | Cognitive impairment                  |                                                          | FP     | HP:0000026 | Male hypogonadism                     |          | FP     |
| HP:0100753 | Schizophrenia                         |                                                          | FP     | HP:0000824 | Growth hormone deficiency             |          | FP     |

*continued on the next page*

Table S11. Osteoporosis – continued

| ID         | Name                             | pmid               | status | ID         | Name                        | pmid     | status |
|------------|----------------------------------|--------------------|--------|------------|-----------------------------|----------|--------|
| HP:0002204 | Pulmonary embolism               |                    | FP     | HP:0001249 | Intellectual disability     |          | FP     |
| HP:0010550 | Paraplegia                       |                    | FP     | HP:0003003 | Colon cancer                |          | FP     |
| HP:0000820 | Abnormality of the thyroid gland |                    | FP     | HP:0000789 | Infertility                 |          | FP     |
| HP:0001658 | Myocardial infarction            |                    | FP     | HP:0003765 | Psoriasis                   |          | FP     |
| HP:0000786 | Primary amenorrhea               |                    | FP     | HP:0000845 | Growth hormone excess       |          | FP     |
| HP:0100021 | Cerebral palsy                   |                    | FP     | HP:0009830 | Peripheral neuropathy       |          | FP     |
| HP:0006528 | Chronic lung disease             |                    | FP     | HP:0011986 | Ectopic ossification        |          | FP     |
| HP:0002665 | Lymphoma                         |                    | FP     | HP:0001909 | Leukemia                    |          | FP     |
| HP:0002097 | Emphysema                        |                    | FP     | HP:0006536 | Obstructive lung disease    |          | FP     |
| HP:0002206 | Pulmonary fibrosis               |                    | FP     | HP:0002092 | Pulmonary hypertension      |          | FP     |
| HP:0006530 | Interstitial pulmonary disease   |                    | FP     | HP:0004936 | Venous thrombosis           |          | FP     |
| HP:0100036 | Pseudo-fractures                 | 4036121            | TP     | HP:0002863 | Myelodysplasia              |          | FP     |
| HP:0002752 | Sparse bone trabeculae           | 18299223           | TP     | HP:0004586 | Biconcave vertebral bodies  | 3659378  | FN     |
| HP:0003876 | Osteoporotic humerus             | 7083689            | FN     | HP:0003080 | Hydroxyprolinuria           | 1887826  | FN     |
| HP:0008428 | Vertebral clefting               | 16091506           | FN     | HP:0004568 | Beaking of vertebral bodies | 25069705 | FN     |
| HP:0003282 | Low alkaline phosphatase         | 9116389<br>8695849 | FN     | HP:0004591 | Disc-like vertebral bodies  | 9548357  | FN     |
| HP:0003987 | Fractured ulna                   | 7083689            | FN     | HP:0002355 | Difficulty walking          | 9458225  | FN     |
| HP:0003084 | Fractures of the long bones      | 7083689            | FN     | HP:0003302 | Spondylolisthesis           | 11458155 | FN     |
| HP:0006640 | Multiple rib fractures           | 16582522           | FN     | HP:0004699 | Osteoporotic metatarsal     | 20681355 | FN     |
| HP:0003964 | Osteoporotic forearm bones       | 1527750            | FN     |            |                             |          |        |

**Table S12.** Overview of HPO annotations for **Rickets** that were derived by concept recognition in PubMed using BioLark. There were 20 true positives, 46 false positives, and 13 false negatives.

| ID         | Name                                  | pmid     | status | ID         | Name                                           | pmid     | status |
|------------|---------------------------------------|----------|--------|------------|------------------------------------------------|----------|--------|
| HP:0002748 | Rickets                               | 23374621 | TP     | HP:0100512 | Vitamin D deficiency                           |          | FP     |
| HP:0002749 | Osteomalacia                          | 23374621 | TP     | HP:0004912 | Hypophosphatemic rickets                       |          | FP     |
| HP:0002901 | Hypocalcemia                          | 23374621 | TP     | HP:0002148 | Hypophosphatemia                               | 23374621 | TP     |
| HP:0003155 | Elevated alkaline phosphatase         | 23374621 | TP     | HP:0000938 | Osteopenia                                     |          | FP     |
| HP:0001510 | Growth delay                          | 23374621 | TP     | HP:0004395 | Malnutrition                                   |          | FP     |
| HP:0000939 | Osteoporosis                          |          | FP     | HP:0002150 | Hypercalciuria                                 | 23374621 | TP     |
| HP:0001250 | Seizures                              |          | FP     | HP:0000121 | Nephrocalcinosis                               |          | FP     |
| HP:0003072 | Hypercalcemia                         |          | FP     | HP:0001518 | Small for gestational age                      |          | FP     |
| HP:0002979 | Bowing of the legs                    | 23374621 | TP     | HP:0002970 | Genu varum                                     | 23374621 | TP     |
| HP:0002024 | Malabsorption                         |          | FP     | HP:0001596 | Alopecia                                       |          | FP     |
| HP:0004322 | Short stature                         | 20926527 | TP     | HP:0000843 | Hyperparathyroidism                            |          | FP     |
| HP:0002857 | Genu valgum                           | 23374621 | TP     | HP:0002199 | Hypocalcemic seizures                          | 12812706 | TP     |
| HP:0000829 | Hypoparathyroidism                    |          | FP     | HP:0002905 | Hyperphosphatemia                              |          | FP     |
| HP:0001324 | Muscle weakness                       |          | FP     | HP:0000117 | Decreased renal tubular phosphate reabsorption | 1755097  | TP     |
| HP:0011002 | Osteopetrosis                         |          | FP     | HP:0002653 | Bone pain                                      | 23374621 | TP     |
| HP:0001281 | Tetany                                | 23374621 | TP     | HP:0000852 | Pseudohypoparathyroidism                       |          | FP     |
| HP:0001508 | Failure to thrive                     |          | FP     | HP:0003109 | Hyperphosphaturia                              |          | FP     |
| HP:0002756 | Pathologic fracture                   |          | FP     | HP:0000897 | Rachitic rosary                                | 23151726 | TP     |
| HP:0001903 | Anemia                                |          | FP     | HP:0001000 | Abnormality of skin pigmentation               |          | FP     |
| HP:0003021 | Metaphyseal cupping                   | 23151726 | TP     | HP:0001947 | Renal tubular acidosis                         |          | FP     |
| HP:0003472 | Hypocalcemic tetany                   | 12812706 | TP     | HP:0100593 | Calcification of cartilage                     |          | FP     |
| HP:0003020 | Enlargement of the wrists             | 21767417 | TP     | HP:0002757 | Recurrent fractures                            | 23374621 | TP     |
| HP:0002814 | Abnormality of the lower limb         |          | FP     | HP:0011001 | Increased bone mineral density                 |          | FP     |
| HP:0001622 | Premature birth                       |          | FP     | HP:0005912 | Biliary atresia                                |          | FP     |
| HP:0100511 | Abnormality of vitamin D metabolism   |          | FP     | HP:0000787 | Nephrolithiasis                                |          | FP     |
| HP:0003355 | Aminoaciduria                         |          | FP     | HP:0003076 | Glycosuria                                     |          | FP     |
| HP:0003126 | Low-molecular-weight proteinuria      |          | FP     | HP:0003282 | Low alkaline phosphatase                       |          | FP     |
| HP:0006463 | Rickets of the lower limbs            |          | FP     | HP:0001942 | Metabolic acidosis                             |          | FP     |
| HP:0001840 | Metatarsus adductus                   |          | FP     | HP:0001225 | Wrist swelling                                 |          | FP     |
| HP:0001949 | Hypokalemic alkalosis                 |          | FP     | HP:0003987 | Fractured ulna                                 |          | FP     |
| HP:0003236 | Elevated serum creatine phosphokinase |          | FP     | HP:0006409 | Progressive leg bowing                         |          | FP     |
| HP:0000945 | Flared irregular metaphyses           |          | FP     | HP:0003029 | Enlargement of the ankles                      |          | FP     |
| HP:0003215 | Dicarboxylic aciduria                 |          | FP     | HP:0002986 | Radial bowing                                  |          | FP     |
| HP:0002007 | Frontal bossing                       | 19576150 | FN     | HP:0008208 | Parathyroid hyperplasia                        | 23374621 | FN     |
| HP:0003084 | Fractures of the long bones           | 23374621 | FN     | HP:0009763 | Limb pain                                      | 23374621 | FN     |
| HP:0002829 | Arthralgia                            | 20418553 | FN     | HP:0001288 | Gait disturbance                               | 8699350  | FN     |
| HP:0006487 | Bowing of the long bones              | 7419691  | FN     | HP:0000920 | Enlargement of the costochondral junction      | 23220549 | FN     |
| HP:0008732 | Renal hypophosphatemia                | 2983252  | FN     | HP:0003016 | Metaphyseal widening                           | 21795457 | FN     |
| HP:0002355 | Difficulty walking                    | 19576150 | FN     | HP:0005897 | Severe osteoporosis                            | 8250499  | FN     |
| HP:0002659 | Increased susceptibility to fractures | 23374621 | FN     |            |                                                |          |        |

**Table S13.** Overview of HPO annotations for **Lepromatous Leprosy** that were derived by concept recognition in PubMed using BioLark. There were 46 true positives, 33 false positives, and 46 false negatives.

| ID         | Name                                 | pmid                                     | status | ID         | Name                                | pmid                 | status |
|------------|--------------------------------------|------------------------------------------|--------|------------|-------------------------------------|----------------------|--------|
| HP:0010783 | Erythema                             | 18627717                                 | TP     | HP:0009830 | Peripheral neuropathy               | 1802936              | TP     |
| HP:0002633 | Vasculitis                           | 10347568                                 | TP     | HP:0001945 | Fever                               | 9522583              | TP     |
| HP:0200036 | Skin nodule                          | 18313706                                 | TP     | HP:0200042 | Skin ulcer                          | 16638386             | TP     |
| HP:0000656 | Ectropion                            | 12831146                                 | TP     | HP:0002835 | Aspiration                          |                      | FP     |
| HP:0002527 | Falls                                |                                          | FP     | HP:0001324 | Muscle weakness                     |                      | FP     |
| HP:0000969 | Edema                                | 24770495                                 | TP     | HP:0001482 | Subcutaneous nodules                | 2119410              | TP     |
| HP:0002721 | Immunodeficiency                     |                                          | FP     | HP:0001128 | Trichiasis                          | 12831146             | TP     |
| HP:0100699 | Scarring                             | 24770495                                 | TP     | HP:0000246 | Sinusitis                           | 5169808              | TP     |
| HP:0000518 | Cataract                             | 2657299<br>12446359                      | TP     | HP:0002960 | Autoimmunity                        |                      | FP     |
| HP:0002716 | Lymphadenopathy                      | 15881039                                 | TP     | HP:0008066 | Abnormal blistering of the skin     | 9747246              | TP     |
| HP:0003474 | Sensory impairment                   | 10700912                                 | TP     | HP:0002719 | Recurrent infections                |                      | FP     |
| HP:0100608 | Metrorrhagia                         |                                          | FP     | HP:0006775 | Multiple myeloma                    |                      | FP     |
| HP:0003470 | Paralysis                            |                                          | FP     | HP:0001094 | Iridocyclitis                       | 1995040              | TP     |
| HP:0007354 | Amyotrophic lateral sclerosis        |                                          | FP     | HP:0011096 | Peripheral demyelination            | 2852213              | TP     |
| HP:0003613 | Antiphospholipid antibody positivity | 1669564                                  | TP     | HP:0011107 | Recurrent aphthous stomatitis       |                      | FP     |
| HP:0000975 | Hyperhidrosis                        |                                          | FP     | HP:0000988 | Skin rash                           | 17551381             | TP     |
| HP:0001903 | Anemia                               | 1402625                                  | TP     | HP:0007759 | Opacification of the corneal stroma | 2657299              | TP     |
| HP:0002840 | Lymphadenitis                        | 15881039                                 | TP     | HP:0001045 | Vitiligo                            | 11123444             | TP     |
| HP:0001019 | Erythroderma                         |                                          | FP     | HP:0001000 | Abnormality of skin pigmentation    | 16044817             | TP     |
| HP:0001089 | Iris atrophy                         | 12831146                                 | TP     | HP:0000554 | Uveitis                             | 9524032              | TP     |
| HP:0000999 | Pyoderma                             |                                          | FP     | HP:0011859 | Punctate keratitis                  | 12831146             | TP     |
| HP:0001075 | Atrophic scars                       | 15282970                                 | TP     | HP:0000964 | Eczema                              |                      | FP     |
| HP:0000491 | Keratitis                            | 9524032                                  | TP     | HP:0002019 | Constipation                        |                      | FP     |
| HP:0000718 | Aggressive behavior                  |                                          | FP     | HP:0001271 | Polyneuropathy                      | 22270208<br>10432812 | TP     |
| HP:0001101 | Iritis                               | 8862265                                  | TP     | HP:0001369 | Arthritis                           | 17976874             | TP     |
| HP:0100532 | Scleritis                            | 11967738                                 | TP     | HP:0002665 | Lymphoma                            |                      | FP     |
| HP:0002725 | Systemic lupus erythematosus         |                                          | FP     | HP:0001067 | Neurofibromas                       |                      | FP     |
| HP:0003447 | Axonal loss                          | 14506718                                 | TP     | HP:0100726 | Kaposi's sarcoma                    |                      | FP     |
| HP:0002860 | Squamous cell carcinoma              | 1787225<br>8089361<br>3198958<br>3198959 | TP     | HP:0000951 | Abnormality of the skin             |                      | FP     |
| HP:0000099 | Glomerulonephritis                   | 2496359                                  | TP     | HP:0011873 | Abnormal platelet count             | 22607288<br>9782435  | TP     |
| HP:0002459 | Dysautonomia                         | 2358707                                  | TP     | HP:0001171 | Ectrodactyly (hands)                |                      | FP     |
| HP:0011120 | Saddle nose                          | 22170033                                 | TP     | HP:0004326 | Cachexia                            |                      | FP     |
| HP:0002102 | Pleuritis                            | 18567421<br>9147904                      | TP     | HP:0003401 | Paresthesia                         | 19603298             | TP     |
| HP:0003365 | Arthralgia of the hip                |                                          | FP     | HP:0000621 | Entropion                           |                      | FP     |
| HP:0002829 | Arthralgia                           | 16638426                                 | TP     | HP:0001581 | Recurrent skin infections           |                      | FP     |
| HP:0000798 | Oligospermia                         |                                          | FP     | HP:0000027 | Azoospermia                         | 7921941              | TP     |

*continued on the next page*

**Table S13. Lepromatous Leprosy – continued**

| ID         | Name                                    | pmid                             | status | ID         | Name                                 | pmid                 | status |
|------------|-----------------------------------------|----------------------------------|--------|------------|--------------------------------------|----------------------|--------|
| HP:0001917 | Renal amyloidosis                       | 2496359                          | TP     | HP:0001289 | Confusion                            |                      | FP     |
| HP:0001262 | Somnolence                              |                                  | FP     | HP:0000421 | Epistaxis                            | 9133791<br>21938685  | TP     |
| HP:0009829 | Phocomelia                              |                                  | FP     | HP:0001059 | Pterygia                             |                      | FP     |
| HP:0001055 | Erysipelas                              |                                  | FP     | HP:0000509 | Conjunctivitis                       | 3508760              | FN     |
| HP:0002625 | Deep venous thrombosis                  | 22607288                         | FN     | HP:0001824 | Weight loss                          | 2707215              | FN     |
| HP:0100646 | Thyroiditis                             | 17120512                         | FN     | HP:0000135 | Hypogonadism                         | 23235783             | FN     |
| HP:0010628 | Facial palsy                            | 9251588                          | FN     | HP:0001882 | Leukopenia                           | 1947478              | FN     |
| HP:0001596 | Alopecia                                | 15677976<br>15022902<br>23174494 | FN     | HP:0011034 | Amyloidosis                          | 3223746              | FN     |
| HP:0000789 | Infertility                             | 12914132<br>7921941              | FN     | HP:0000221 | Furrowed tongue                      | 1431321<br>8425797   | FN     |
| HP:0009831 | Mononeuropathy                          | 14750581<br>2624076              | FN     | HP:0100495 | Mastocytosis                         | 3880309<br>15022902  | FN     |
| HP:0000771 | Gynecomastia                            | 2262715<br>7921941               | FN     | HP:0000495 | Recurrent corneal erosions           | 2657299<br>10396193  | FN     |
| HP:0000389 | Chronic otitis media                    | 2086677                          | FN     | HP:0003651 | Foam cells                           | 15056385             | FN     |
| HP:0001010 | Hypopigmentation of the skin            | 8532702                          | FN     | HP:0003453 | Antineutrophil antibody positivity   | 10347568             | FN     |
| HP:0003493 | Antinuclear antibody positivity         | 10347568                         | FN     | HP:0001025 | Urticaria                            | 15835607<br>17511942 | FN     |
| HP:0001876 | Pancytopenia                            | 24171241                         | FN     | HP:0000979 | Purpura                              | 3275072              | FN     |
| HP:0000802 | Impotence                               | 2358707<br>18075988              | FN     | HP:0003202 | Amyotrophy                           | 15581032             | FN     |
| HP:0001919 | Acute renal failure                     | 3268517                          | FN     | HP:0001291 | Abnormality of the cranial nerves    | 9251586              | FN     |
| HP:0000501 | Glaucoma                                | 22607288<br>9782435              | FN     | HP:0001873 | Thrombocytopenia                     | 24171241             | FN     |
| HP:0000365 | Hearing impairment                      | 7714350                          | FN     | HP:0011123 | Inflammatory abnormality of the skin | 23133681             | FN     |
| HP:0000199 | Tongue nodules                          | 8425797                          | FN     | HP:0011469 | Nasal regurgitation                  | 8942155              | FN     |
| HP:0001982 | Sea-blue histiocytosis                  | 16961654                         | FN     | HP:0001063 | Acrocyanosis                         | 8745686              | FN     |
| HP:0200034 | Skin papules                            | 16650172                         | FN     | HP:0200035 | skin plaques                         | 16008652             | FN     |
| HP:0000649 | Abnormality of vision evoked potentials | 9251586                          | FN     | HP:0002293 | Alopecia of scalp                    | 9503871              | FN     |
| HP:0007178 | Motor polyneuropathy                    | 18075988                         | FN     | HP:0000029 | Testicular atrophy                   | 7921941              | FN     |
| HP:0100686 | Enthesitis                              | 8782134                          | FN     | HP:0006480 | Premature loss of teeth              | 17072249             | FN     |
| HP:0100778 | Cryoglobulinemia                        | 11309832                         | FN     | HP:0000093 | Proteinuria                          | 2496359              | FN     |
| HP:0011355 | Localized skin lesion                   | 1807258                          | FN     |            |                                      |                      |        |

**Table S14.** Overview of HPO annotations for **Dirofilariasis** that were derived by concept recognition in PubMed using BioLark. There were 11 true positives, 47 false positives, and 17 false negatives.

| ID         | Name                                     | pmid               | status | ID         | Name                                           | pmid               | status |
|------------|------------------------------------------|--------------------|--------|------------|------------------------------------------------|--------------------|--------|
| HP:0001482 | Subcutaneous nodules                     | 23776842           | TP     | HP:0001807 | Ridged nail                                    |                    | FP     |
| HP:0001880 | Eosinophilia                             | 9754010            | TP     | HP:0002092 | Pulmonary hypertension                         |                    | FP     |
| HP:0002580 | Volvulus                                 |                    | FP     | HP:0006532 | Recurrent pneumonia                            |                    | FP     |
| HP:0002204 | Pulmonary embolism                       | 9531965            | TP     | HP:0001324 | Muscle weakness                                |                    | FP     |
| HP:0001907 | Thromboembolism                          |                    | FP     | HP:0002719 | Recurrent infections                           |                    | FP     |
| HP:0002094 | Dyspnea                                  |                    | FP     | HP:0000989 | Pruritus                                       | 477322<br>18322771 | TP     |
| HP:0000969 | Edema                                    | 17176413           | TP     | HP:0001635 | Congestive heart failure                       |                    | FP     |
| HP:0100608 | Metrorrhagia                             |                    | FP     | HP:0000964 | Eczema                                         |                    | FP     |
| HP:0001541 | Ascites                                  |                    | FP     | HP:0002090 | Pneumonia                                      |                    | FP     |
| HP:0000099 | Glomerulonephritis                       |                    | FP     | HP:0004325 | Decreased body weight                          |                    | FP     |
| HP:0002202 | Pleural effusion                         | 1926037            | TP     | HP:0004722 | Thickening of the glomerular basement membrane |                    | FP     |
| HP:0003641 | Hemoglobinuria                           |                    | FP     | HP:0001903 | Anemia                                         |                    | FP     |
| HP:0100526 | Neoplasm of the lungs                    |                    | FP     | HP:0010783 | Erythema                                       |                    | FP     |
| HP:0002586 | Peritonitis                              | 8244870<br>1327358 | TP     | HP:0002527 | Falls                                          |                    | FP     |
| HP:0001596 | Alopecia                                 |                    | FP     | HP:0003712 | Muscle hypertrophy                             |                    | FP     |
| HP:0100760 | Clubbing of toes                         |                    | FP     | HP:0001289 | Confusion                                      |                    | FP     |
| HP:0010310 | Chylothorax                              |                    | FP     | HP:0002108 | Spontaneous pneumothorax                       |                    | FP     |
| HP:0000789 | Infertility                              |                    | FP     | HP:0100845 | Anaphylactic shock                             |                    | FP     |
| HP:0002013 | Vomiting                                 |                    | FP     | HP:0100749 | Chest pain                                     | 12822426           | TP     |
| HP:0000505 | Visual impairment                        |                    | FP     | HP:0008222 | Female infertility                             |                    | FP     |
| HP:0200036 | Skin nodule                              | 19127968           | TP     | HP:0006530 | Interstitial pulmonary disease                 |                    | FP     |
| HP:0100770 | Hyperperistalsis                         |                    | FP     | HP:0002039 | Anorexia                                       |                    | FP     |
| HP:0010444 | Pulmonary insufficiency                  |                    | FP     | HP:0001279 | Syncope                                        |                    | FP     |
| HP:0001945 | Fever                                    | 9022330            | TP     | HP:0001909 | Leukemia                                       |                    | FP     |
| HP:0000793 | Membranoproliferative glomerulonephritis |                    | FP     | HP:0001254 | Lethargy                                       |                    | FP     |
| HP:0100725 | Lichenification                          |                    | FP     | HP:0002113 | Pulmonary infiltrates                          | 12693088           | TP     |
| HP:0001257 | Spasticity                               |                    | FP     | HP:0000093 | Proteinuria                                    |                    | FP     |
| HP:0003256 | Abnormality of the coagulation cascade   |                    | FP     | HP:0004420 | Arterial thrombosis                            |                    | FP     |
| HP:0003573 | Increased total bilirubin                |                    | FP     | HP:0005521 | Disseminated intravascular coagulation         |                    | FP     |
| HP:0002105 | Hemoptysis                               | 2643558            | FN     | HP:0000520 | Proptosis                                      | 10094355           | FN     |
| HP:0002955 | Granulomatosis                           | 3616266            | FN     | HP:0002716 | Lymphadenopathy                                | 22915604           | FN     |
| HP:0100534 | Episcleritis                             | 7739879            | FN     | HP:0002840 | Lymphadenitis                                  | 3626438            | FN     |
| HP:0003095 | Septic arthritis                         | 3435572<br>3626438 | FN     | HP:0100750 | Atelectasis                                    | 12822426           | FN     |
| HP:0000651 | Diplopia                                 | 998706             | FN     | HP:0007734 | Enlarged lacrimal glands                       | 17440285           | FN     |
| HP:0100540 | Palpebral edema                          | 20653124           | FN     | HP:0010605 | Chalazion                                      | 11521439           | FN     |
| HP:0011921 | Exudative pleural effusion               | 12822426           | FN     | HP:0007879 | Allergic conjunctivitis                        | 11055226           | FN     |
| HP:0003212 | Increased IgE level                      | 9022330            | FN     | HP:0002875 | Exertional dyspnea                             | 9022330            | FN     |
| HP:0000508 | Ptosis                                   | 12213168           | FN     |            |                                                |                    |        |



**Table S15.** Overview of HPO annotations for **Opisthorchiasis** that were derived by concept recognition in PubMed using BioLark. There were 19 true positives, 21 false positives, and 14 false negatives.

| ID         | Name                          | pmid                 | status | ID         | Name                              | pmid                | status |
|------------|-------------------------------|----------------------|--------|------------|-----------------------------------|---------------------|--------|
| HP:0002240 | Hepatomegaly                  | 4095605              | TP     | HP:0001082 | Cholecystitis                     | 4095605             | TP     |
| HP:0003765 | Psoriasis                     | 15452616<br>12660845 | TP     | HP:0001081 | Cholelithiasis                    | 16768350            | TP     |
| HP:0001880 | Eosinophilia                  | 21938537             | TP     | HP:0001396 | Cholestasis                       | 21938537            | TP     |
| HP:0000952 | Jaundice                      | 4012543              | TP     | HP:0002719 | Recurrent infections              |                     | FP     |
| HP:0001394 | Cirrhosis                     |                      | FP     | HP:0002896 | Neoplasm of the liver             |                     | FP     |
| HP:0002321 | Vertigo                       |                      | FP     | HP:0003326 | Myalgia                           |                     | FP     |
| HP:0006560 | Biliary hyperplasia           | 2772709              | TP     | HP:0002027 | Abdominal pain                    | 21938537            | TP     |
| HP:0002018 | Nausea                        |                      | FP     | HP:0001733 | Pancreatitis                      | 19329217            | TP     |
| HP:0001945 | Fever                         | 4012543              | TP     | HP:0006562 | Viral hepatitis                   |                     | FP     |
| HP:0001402 | Hepatocellular carcinoma      | 21603286             | TP     | HP:0001324 | Muscle weakness                   |                     | FP     |
| HP:0002039 | Anorexia                      | 6542384              | TP     | HP:0003365 | Arthralgia of the hip             |                     | FP     |
| HP:0100523 | Liver abscess                 | 2558417              | TP     | HP:0002017 | Nausea and vomiting               |                     | FP     |
| HP:0002588 | Duodenal ulcer                | -                    | TP     | HP:0001408 | Bile duct proliferation           | 2772709             | TP     |
| HP:0003573 | Increased total bilirubin     |                      | FP     | HP:0002329 | Drowsiness                        |                     | FP     |
| HP:0002527 | Falls                         |                      | FP     | HP:0000099 | Glomerulonephritis                |                     | FP     |
| HP:0002592 | Gastric ulcer                 |                      | FP     | HP:0005609 | Gallbladder dysfunction           | 6542384             | TP     |
| HP:0000737 | Irritability                  |                      | FP     | HP:0005231 | Chronic gastritis                 | 15484977            | TP     |
| HP:0002024 | Malabsorption                 | 2727922              | TP     | HP:0003075 | Hypoproteinemia                   |                     | FP     |
| HP:0002375 | Hypokinesia                   |                      | FP     | HP:0011227 | Elevated C-reactive protein level |                     | FP     |
| HP:0001406 | Intrahepatic cholestasis      |                      | FP     | HP:0003394 | Muscle cramps                     |                     | FP     |
| HP:0002613 | Biliary cirrhosis             | 19329217             | FN     | HP:0001824 | Weight loss                       | 1544352<br>6542384  | FN     |
| HP:0005230 | Biliary tract obstruction     | 6542384              | FN     | HP:0001407 | Hepatic cysts                     | 1803102<br>18725803 | FN     |
| HP:0003155 | Elevated alkaline phosphatase | 14574844<br>4095605  | FN     | HP:0002605 | Hepatic necrosis                  | 14574844            | FN     |
| HP:0100724 | Hypercoagulability            | 19202620<br>21932543 | FN     | HP:0006559 | Hepatic calcification             | 18725803            | FN     |
| HP:0011900 | Hypofibrinogenemia            | 21932543             | FN     | HP:0006580 | Portal fibrosis                   | 6542384             | FN     |
| HP:0002630 | Fat malabsorption             | 20873180             | FN     | HP:0003073 | Hypoalbuminemia                   | 4095605             | FN     |
| HP:0002904 | Hyperbilirubinemia            | 4095605              | FN     | HP:0002910 | Elevated hepatic transaminases    | 4095605             | FN     |

**Table S16.** Overview of HPO annotations for **Croup** that were derived by concept recognition in PubMed using BioLark. There were 13 true positives, 13 false positives, and 24 false negatives.

| ID         | Name                                         | pmid     | status | ID         | Name                                               | pmid     | status |
|------------|----------------------------------------------|----------|--------|------------|----------------------------------------------------|----------|--------|
| HP:0010307 | Stridor                                      | 9451322  | TP     | HP:0002781 | Upper airway obstruction                           | 9445317  | TP     |
| HP:0011950 | Bronchiolitis                                |          | FP     | HP:0002099 | Asthma                                             |          | FP     |
| HP:0005348 | Inspiratory stridor                          | 18646444 | TP     | HP:0002098 | Respiratory distress                               | 6386967  | TP     |
| HP:0002090 | Pneumonia                                    |          | FP     | HP:0011947 | Respiratory tract infection                        | 21249651 | TP     |
| HP:0002783 | Recurrent lower respiratory tract infections |          | FP     | HP:0002835 | Aspiration                                         |          | FP     |
| HP:0001609 | Hoarse voice                                 | 18646444 | TP     | HP:0001607 | Subglottic stenosis                                | 21493242 | TP     |
| HP:0005945 | Laryngeal obstruction                        | 15523420 | TP     | HP:0001945 | Fever                                              | 10910624 | TP     |
| HP:0000961 | Cyanosis                                     | 6386967  | TP     | HP:0000969 | Edema                                              |          | FP     |
| HP:0001601 | Laryngomalacia                               |          | FP     | HP:0002527 | Falls                                              |          | FP     |
| HP:0002788 | Recurrent upper respiratory tract infections |          | FP     | HP:0011110 | Tonsillitis                                        |          | FP     |
| HP:0002020 | Gastroesophageal reflux                      |          | FP     | HP:0002093 | Respiratory insufficiency                          | 15523420 | TP     |
| HP:0001602 | Laryngeal stenosis                           | 22995201 | TP     | HP:0002094 | Dyspnea                                            | 8628614  | TP     |
| HP:0001613 | Hoarse voice (caused by tumor impingement)   |          | FP     | HP:0001606 | Vocal cord paralysis (caused by tumor impingement) |          | FP     |
| HP:0004894 | Laryngotracheal stenosis                     | 3924864  | FN     | HP:0001618 | Dysphonia                                          | 22433683 | FN     |
| HP:0100750 | Atelectasis                                  | 19859734 | FN     | HP:0011948 | Acute respiratory tract infection                  | 18995152 | FN     |
| HP:0100598 | Pulmonary edema                              | 857236   | FN     | HP:0012027 | Laryngeal edema                                    | 7800389  | FN     |
| HP:0002880 | Respiratory difficulties                     | 529358   | FN     | HP:0011134 | Low-grade fever                                    | 8336098  | FN     |
| HP:0003212 | Increased IgE level                          | 6778038  | FN     | HP:0002777 | Tracheal stenosis                                  | 22995201 | FN     |
| HP:0001944 | Dehydration                                  | 8417425  | FN     | HP:0002013 | Vomiting                                           | 9990833  | FN     |
| HP:0000737 | Irritability                                 | 8114457  | FN     | HP:0100806 | Sepsis                                             | 11510049 | FN     |
| HP:0005951 | Progressive inspiratory stridor              | 6386967  | FN     | HP:0008755 | Laryngotracheomalacia                              | 16363272 | FN     |
| HP:0003237 | Increased IgG level                          | 6778038  | FN     | HP:0002791 | Hypoventilation                                    | 16647977 | FN     |
| HP:0000713 | Agitation                                    | -        | FN     | HP:0004429 | Recurrent viral infections                         | 2117137  | FN     |
| HP:0002870 | Obstructive sleep apnea                      | 6379587  | FN     | HP:0010783 | Erythema                                           | 14723257 | FN     |
| HP:0004890 | Elevated pulmonary artery pressure           | 16647977 | FN     | HP:0002017 | Nausea and vomiting                                | 10065566 | FN     |

**Table S17.** Overview of HPO annotations for **Ethmoid Sinusitis** that were derived by concept recognition in PubMed using BioLark. There were 5 true positives, 13 false positives, and 30 false negatives.

| ID         | Name                                         | pmid     | status | ID         | Name                       | pmid     | status |
|------------|----------------------------------------------|----------|--------|------------|----------------------------|----------|--------|
| HP:0000246 | Sinusitis                                    | 7588871  | TP     | HP:0011109 | Chronic sinusitis          |          | FP     |
| HP:0000255 | Acute sinusitis                              |          | FP     | HP:0100582 | Nasal polyposis            | 16216171 | TP     |
| HP:0100658 | Cellulitis                                   |          | FP     | HP:0011108 | Recurrent sinusitis        |          | FP     |
| HP:0001742 | Nasal obstruction                            | 16496109 | TP     | HP:0000520 | Proptosis                  |          | FP     |
| HP:0002331 | Headache (with pheochromocytoma)             |          | FP     | HP:0000572 | Visual loss                |          | FP     |
| HP:0002099 | Asthma                                       |          | FP     | HP:0001287 | Meningitis                 | 9072242  | TP     |
| HP:0000718 | Aggressive behavior                          |          | FP     | HP:0100699 | Scarring                   |          | FP     |
| HP:0002090 | Pneumonia                                    |          | FP     | HP:0100653 | Optic neuritis             |          | FP     |
| HP:0000245 | Abnormality of the sinuses                   |          | FP     | HP:0000486 | Strabismus                 | 12792325 | TP     |
| HP:0002754 | Osteomyelitis                                | 20069309 | FN     | HP:0001945 | Fever                      | 18431903 | FN     |
| HP:0002719 | Recurrent infections                         | 9230316  | FN     | HP:0000651 | Diplopia                   | 16238043 | FN     |
| HP:0001880 | Eosinophilia                                 | 8335853  | FN     | HP:0000622 | Blurred vision             | 9037991  | FN     |
| HP:0000602 | Ophthalmoplegia                              | 1845269  | FN     | HP:0000421 | Epistaxis                  | 1391808  | FN     |
| HP:0002788 | Recurrent upper respiratory tract infections | 11385344 | FN     | HP:0005305 | Cerebral venous thrombosis | 8750066  | FN     |
| HP:0100806 | Sepsis                                       | 10699248 | FN     | HP:0002315 | Headache                   | 19076651 | FN     |
| HP:0002257 | Chronic rhinitis                             | 19452706 | FN     | HP:0100539 | Periorbital edema          | 8830571  | FN     |
| HP:0004409 | Hyposmia                                     | 17685054 | FN     | HP:0000603 | Central scotoma            | 20727299 | FN     |
| HP:0000579 | Nasolacrimal duct obstruction                | 20639782 | FN     | HP:0000458 | Anosmia                    | 8758625  | FN     |
| HP:0011134 | Low-grade fever                              | 12652233 | FN     | HP:0009926 | Increased lacrimation      | 20639782 | FN     |
| HP:0000575 | Scotoma                                      | 9695165  | FN     | HP:0001085 | Papilledema                | 11713715 | FN     |
| HP:0007686 | Abnormal pupillary function                  | 9037991  | FN     | HP:0001123 | Visual field defect        | 9695165  | FN     |
| HP:0000508 | Ptosis                                       | 19930782 | FN     | HP:0100660 | Dyskinesia                 | 19953662 | FN     |
| HP:0010783 | Erythema                                     | 8944354  | FN     | HP:0002013 | Vomiting                   | 7772962  | FN     |
| HP:0000737 | Irritability                                 | 11902076 | FN     | HP:0002360 | Sleep disturbance          | 8515694  | FN     |

**Table S18.** Overview of HPO annotations for **Laryngeal Tuberculosis** that were derived by concept recognition in PubMed using BioLark. There were 10 true positives, 2 false positives, and 9 false negatives.

| ID         | Name                  | pmid                            | status | ID         | Name                                       | pmid                | status |
|------------|-----------------------|---------------------------------|--------|------------|--------------------------------------------|---------------------|--------|
| HP:0001609 | Hoarse voice          | 19720251                        | TP     | HP:0001618 | Dysphonia                                  | 11715262            | TP     |
| HP:0002015 | Dysphagia             | 9580143                         | TP     | HP:0001613 | Hoarse voice (caused by tumor impingement) |                     | FP     |
| HP:0011110 | Tonsillitis           | 18634293                        | TP     | HP:0010307 | Stridor                                    | 8445701             | TP     |
| HP:0002716 | Lymphadenopathy       | 16360822                        | TP     | HP:0001945 | Fever                                      | 15455624            | TP     |
| HP:0001824 | Weight loss           | 22755382                        | TP     | HP:0002840 | Lymphadenitis                              | 7681653<br>14567053 | TP     |
| HP:0002721 | Immunodeficiency      |                                 | FP     | HP:0002955 | Granulomatosis                             | 18538743            | TP     |
| HP:0011850 | Parotitis             | 19656502<br>16358915<br>9627234 | FN     | HP:0000975 | Hyperhidrosis                              | 22755382            | FN     |
| HP:0002094 | Dyspnea               | 17633676                        | FN     | HP:0011134 | Low-grade fever                            | 19621599            | FN     |
| HP:0002113 | Pulmonary infiltrates | 11347458                        | FN     | HP:0006511 | Laryngeal stridor                          | 7803014             | FN     |
| HP:0012027 | Laryngeal edema       | 19621599                        | FN     | HP:0002781 | Upper airway obstruction                   | 8445701             | FN     |
| HP:0002039 | Anorexia              | 15455624                        | FN     |            |                                            |                     |        |

**Table S19.** Overview of HPO annotations for **Acromegaly** that were derived by concept recognition in PubMed using BioLark. There were 21 true positives, 71 false positives, and 23 false negatives.

| ID         | Name                                  | pmid     | status | ID         | Name                                 | pmid     | status |
|------------|---------------------------------------|----------|--------|------------|--------------------------------------|----------|--------|
| HP:0000845 | Growth hormone excess                 |          | FP     | HP:0002893 | Pituitary adenoma                    |          | FP     |
| HP:0011750 | Neoplasm of the anterior pituitary    |          | FP     | HP:0006767 | Pituitary prolactin cell adenoma     |          | FP     |
| HP:0000870 | Prolactin excess                      |          | FP     | HP:0000822 | Hypertension                         |          | FP     |
| HP:0000819 | Diabetes mellitus                     |          | FP     | HP:0000855 | Insulin resistance                   | 18393170 | TP     |
| HP:0100646 | Thyroiditis                           |          | FP     | HP:0000833 | Glucose intolerance                  | 18578866 | TP     |
| HP:0002331 | Headache (with pheochromocytoma)      |          | FP     | HP:0000824 | Growth hormone deficiency            |          | FP     |
| HP:0002527 | Falls                                 |          | FP     | HP:0001638 | Cardiomyopathy                       |          | FP     |
| HP:0001578 | Hypercortisolism                      |          | FP     | HP:0001733 | Pancreatitis                         |          | FP     |
| HP:0010735 | Polyostotic fibrous dysplasia         |          | FP     | HP:0100570 | Carcinoid                            |          | FP     |
| HP:0001943 | Hypoglycemia                          |          | FP     | HP:0000135 | Hypogonadism                         |          | FP     |
| HP:0010535 | Sleep apnea                           | 18578866 | TP     | HP:0001712 | Left ventricular hypertrophy         |          | FP     |
| HP:0001640 | Cardiomegaly                          | 18578866 | TP     | HP:0100568 | Neoplasm of the endocrine system     |          | FP     |
| HP:0000836 | Hyperthyroidism                       |          | FP     | HP:0000975 | Hyperhidrosis                        |          | FP     |
| HP:0001635 | Congestive heart failure              |          | FP     | HP:0000873 | Diabetes insipidus                   |          | FP     |
| HP:0001123 | Visual field defect                   | 23337021 | TP     | HP:0000821 | Hypothyroidism                       |          | FP     |
| HP:0000141 | Amenorrhea                            | 18578866 | TP     | HP:0001297 | Stroke                               |          | FP     |
| HP:0000303 | Mandibular prognathia                 | 10196815 | TP     | HP:0003040 | Arthropathy                          |          | FP     |
| HP:0001513 | Obesity                               |          | FP     | HP:0000718 | Aggressive behavior                  |          | FP     |
| HP:0007354 | Amyotrophic lateral sclerosis         |          | FP     | HP:0000871 | Panhypopituitarism                   |          | FP     |
| HP:0000853 | Goiter                                | 18578866 | TP     | HP:0000839 | Pituitary dwarfism                   |          | FP     |
| HP:0003074 | Hyperglycemia                         |          | FP     | HP:0002870 | Obstructive sleep apnea              | 18578866 | TP     |
| HP:0011761 | Pituitary null cell adenoma           |          | FP     | HP:0000939 | Osteoporosis                         |          | FP     |
| HP:0003365 | Arthralgia of the hip                 | 18578866 | TP     | HP:0003003 | Colon cancer                         |          | FP     |
| HP:0000842 | Hyperinsulinemia                      | 1806481  | TP     | HP:0002829 | Arthralgia                           |          | FP     |
| HP:0001324 | Muscle weakness                       |          | FP     | HP:0004322 | Short stature                        |          | FP     |
| HP:0000158 | Macroglossia                          | 18578866 | TP     | HP:0100829 | Galactorrhoea                        | 11352287 | TP     |
| HP:0001000 | Abnormality of skin pigmentation      |          | FP     | HP:0002014 | Diarrhea                             |          | FP     |
| HP:0001952 | Abnormal glucose tolerance            |          | FP     | HP:0003510 | Severe short stature                 |          | FP     |
| HP:0000831 | Insulin-resistant diabetes mellitus   | 18578866 | TP     | HP:0001677 | Coronary artery disease              |          | FP     |
| HP:0100774 | Hyperostosis                          | 18578866 | TP     | HP:0003005 | Ganglioneuroma                       |          | FP     |
| HP:0000098 | Tall stature                          | 21158216 | TP     | HP:0011675 | Arrhythmia                           |          | FP     |
| HP:0002666 | Pheochromocytoma                      |          | FP     | HP:0002039 | Anorexia                             |          | FP     |
| HP:0002910 | Elevated hepatic transaminases        |          | FP     | HP:0002858 | Meningioma                           |          | FP     |
| HP:0001644 | Dilated cardiomyopathy                |          | FP     | HP:0001627 | Abnormality of the heart             |          | FP     |
| HP:0002690 | Large sella turcica                   | 9474613  | TP     | HP:0000505 | Visual impairment                    |          | FP     |
| HP:0010541 | Cutis gyrata of scalp                 | 18211488 | TP     | HP:0000956 | Acanthosis nigricans                 | 7951506  | TP     |
| HP:0002781 | Upper airway obstruction              | 18578866 | TP     | HP:0001654 | Abnormality of the heart valves      |          | FP     |
| HP:0002758 | Osteoarthritis                        |          | FP     | HP:0003774 | End stage renal disease              |          | FP     |
| HP:0002119 | Ventriculomegaly                      |          | FP     | HP:0008291 | Pituitary corticotropic cell adenoma |          | FP     |
| HP:0011760 | Pituitary growth hormone cell adenoma |          | FP     | HP:0000147 | Polycystic ovaries                   | 17651451 | TP     |
| HP:0000103 | Polyuria                              |          | FP     | HP:0100651 | Type I diabetes mellitus             |          | FP     |
| HP:0005978 | Type II diabetes mellitus             |          | FP     | HP:0002684 | Thickened calvaria                   |          | FP     |
| HP:0009800 | Maternal diabetes                     |          | FP     | HP:0000140 | Abnormality of the menstrual cycle   |          | FP     |
| HP:0000823 | Delayed puberty                       |          | FP     | HP:0003162 | Fasting hypoglycemia                 |          | FP     |
| HP:0003351 | Decreased circulating renin level     |          | FP     | HP:0011762 | Pituitary thyrotropic cell adenoma   |          | FP     |
| HP:0002737 | Thick skull base                      |          | FP     | HP:0002681 | Deformed sella turcica               |          | FP     |

*continued on the next page*

**Table S19. Acromegaly – continued**

| <b>ID</b>  | <b>Name</b>                    | <b>pmid</b>         | <b>status</b> | <b>ID</b>  | <b>Name</b>                   | <b>pmid</b>        | <b>status</b> |
|------------|--------------------------------|---------------------|---------------|------------|-------------------------------|--------------------|---------------|
| HP:0002007 | Frontal bossing                | 18578866            | FN            | HP:0000280 | Coarse facial features        | 23329711           | FN            |
| HP:0010609 | Skin tags                      | 18578866            | FN            | HP:0001670 | Asymmetric septal hypertrophy | 154293             | FN            |
| HP:0001176 | Large hands                    | 18578866            | FN            | HP:0000858 | Menstrual irregularities      | 17651451           | FN            |
| HP:0004416 | Precocious atherosclerosis     | 9389993             | FN            | HP:0005987 | Multinodular goiter           | 18578866           | FN            |
| HP:0005994 | Nodular goiter                 | 18578866            | FN            | HP:0002150 | Hypercalciuria                | 1668402            | FN            |
| HP:0001685 | Myocardial fibrosis            | 1395769             | FN            | HP:0008843 | Hip osteoarthritis            | 21131647           | FN            |
| HP:0001007 | Hirsutism                      | 10443669            | FN            | HP:0003416 | Spinal canal stenosis         | 6664455<br>7919651 | FN            |
| HP:0000689 | Dental malocclusion            | 10196815            | FN            | HP:0001548 | Overgrowth                    | 6805079            | FN            |
| HP:0001639 | Hypertrophic cardiomyopathy    | 20834198<br>9711886 | FN            | HP:0001653 | Mitral regurgitation          | 16580860           | FN            |
| HP:0001081 | Cholelithiasis                 | 8432484             | FN            | HP:0001714 | Ventricular hypertrophy       | 18578866           | FN            |
| HP:0001072 | Thickened skin                 | 18578866            | FN            | HP:0004308 | Ventricular arrhythmia        | 18578866           | FN            |
| HP:0004438 | Hyperostosis frontalis interna | 3731577             | FN            |            |                               |                    |               |

**Table S20.** Overview of HPO annotations for **Primary Hyperparathyroidism** that were derived by concept recognition in PubMed using BioLark. There were 14 true positives, 22 false positives, and 19 false negatives.

| ID         | Name                                 | pmid     | status | ID         | Name                                                 | pmid                 | status |
|------------|--------------------------------------|----------|--------|------------|------------------------------------------------------|----------------------|--------|
| HP:0008200 | Primary hyperparathyroidism          | 22173046 | TP     | HP:0002897 | Parathyroid adenoma                                  |                      | FP     |
| HP:0003072 | Hypercalcemia                        | 22271812 | TP     | HP:0006780 | Parathyroid carcinoma                                |                      | FP     |
| HP:0000787 | Nephrolithiasis                      | 22173046 | TP     | HP:0100646 | Thyroiditis                                          |                      | FP     |
| HP:0100568 | Neoplasm of the endocrine system     |          | FP     | HP:0000867 | Secondary hyperparathyroidism                        |                      | FP     |
| HP:0002901 | Hypocalcemia                         |          | FP     | HP:0008208 | Parathyroid hyperplasia                              | 19679950             | TP     |
| HP:0000828 | Abnormality of the parathyroid gland |          | FP     | HP:0000843 | Hyperparathyroidism                                  |                      | FP     |
| HP:0011769 | Ectopic parathyroid                  |          | FP     | HP:0000939 | Osteoporosis                                         | 18057667             | TP     |
| HP:0002757 | Recurrent fractures                  | 23098341 | TP     | HP:0011770 | Tertiary hyperparathyroidism                         |                      | FP     |
| HP:0000820 | Abnormality of the thyroid gland     |          | FP     | HP:0000938 | Osteopenia                                           | 19685826<br>18057655 | TP     |
| HP:0000829 | Hypoparathyroidism                   |          | FP     | HP:0003165 | Elevated circulating parathyroid hormone (PTH) level | 23374741             | TP     |
| HP:0002150 | Hypercalciuria                       | 22584631 | TP     | HP:0000121 | Nephrocalcinosis                                     | 23715355             | TP     |
| HP:0002653 | Bone pain                            | 17263969 | TP     | HP:0000822 | Hypertension                                         |                      | FP     |
| HP:0001324 | Muscle weakness                      | 22271812 | TP     | HP:0000853 | Goiter                                               |                      | FP     |
| HP:0002835 | Aspiration                           |          | FP     | HP:0002895 | Papillary thyroid carcinoma                          |                      | FP     |
| HP:0005987 | Multinodular goiter                  |          | FP     | HP:0000103 | Polyuria                                             | 20200146             | TP     |
| HP:0005897 | Severe osteoporosis                  | 23553864 | TP     | HP:0000836 | Hyperthyroidism                                      |                      | FP     |
| HP:0002527 | Falls                                |          | FP     | HP:0003774 | End stage renal disease                              |                      | FP     |
| HP:0001733 | Pancreatitis                         |          | FP     | HP:0003127 | Hypocalciuria                                        |                      | FP     |
| HP:0002148 | Hypophosphatemia                     | 17201799 | FN     | HP:0003155 | Elevated alkaline phosphatase                        | 17370440             | FN     |
| HP:0002756 | Pathologic fracture                  | 19685826 | FN     | HP:0004934 | Vascular calcification                               | 23046088             | FN     |
| HP:0003326 | Myalgia                              | 21153954 | FN     | HP:0002019 | Constipation                                         | 21723154             | FN     |
| HP:0002354 | Memory impairment                    | 17263969 | FN     | HP:0001735 | Acute pancreatitis                                   | 18194938             | FN     |
| HP:0002039 | Anorexia                             | 19999395 | FN     | HP:0002018 | Nausea                                               | 17263969             | FN     |
| HP:0000737 | Irritability                         | 19999395 | FN     | HP:0002027 | Abdominal pain                                       | 17602056             | FN     |
| HP:0004349 | Reduced bone mineral density         | 17602056 | FN     | HP:0001824 | Weight loss                                          | 17263969             | FN     |
| HP:0000716 | Depression                           | 23374740 | FN     | HP:0001254 | Lethargy                                             | 17602056             | FN     |
| HP:0000720 | Mood swings                          | 17263969 | FN     | HP:0002748 | Rickets                                              | 19189688             | FN     |
| HP:0004724 | Calcium nephrolithiasis              | 21183554 | FN     |            |                                                      |                      |        |

**Table S21.** Overview of HPO annotations for **Alcoholic Pancreatitis** that were derived by concept recognition in PubMed using BioLark. There were 18 true positives, 8 false positives, and 17 false negatives.

| ID         | Name                              | pmid                 | status | ID         | Name                            | pmid                | status |
|------------|-----------------------------------|----------------------|--------|------------|---------------------------------|---------------------|--------|
| HP:0006280 | Chronic pancreatitis              |                      | FP     | HP:0001735 | Acute pancreatitis              | 12828958            | TP     |
| HP:0005206 | Pancreatic pseudocyst             | 17967181             | TP     | HP:0001733 | Pancreatitis                    |                     | FP     |
| HP:0100732 | Pancreatic fibrosis               | 12828957             | TP     | HP:0100027 | Recurrent pancreatitis          | 18415757            | TP     |
| HP:0005213 | Pancreatic calcification          | 13509579             | TP     | HP:0002027 | Abdominal pain                  | 12170706            | TP     |
| HP:0001081 | Cholelithiasis                    |                      | FP     | HP:0002894 | Neoplasm of the pancreas        |                     | FP     |
| HP:0001738 | Exocrine pancreatic insufficiency | 12828957             | TP     | HP:0001394 | Cirrhosis                       |                     | FP     |
| HP:0100844 | Pancreatic fistula                | 22560825             | TP     | HP:0002239 | Gastrointestinal hemorrhage     | 9445739             | TP     |
| HP:0000819 | Diabetes mellitus                 | 10430382             | TP     | HP:0002960 | Autoimmunity                    |                     | FP     |
| HP:0002570 | Steatorrhea                       | 18985807             | TP     | HP:0006725 | Pancreatic adenocarcinoma       | 20455050            | TP     |
| HP:0002202 | Pleural effusion                  | 17516324             | TP     | HP:0005236 | Chronic calcifying pancreatitis | 13509579            | TP     |
| HP:0001541 | Ascites                           | 17516324             | TP     | HP:0001396 | Cholestasis                     | 11393404            | TP     |
| HP:0000952 | Jaundice                          | 17198198             | TP     | HP:0004395 | Malnutrition                    |                     | FP     |
| HP:0000488 | Retinopathy                       | 15803177             | TP     | HP:0002617 | Aneurysm                        |                     | FP     |
| HP:0001737 | Pancreatic cysts                  | 20232071             | FN     | HP:0002248 | Hematemesis                     | 12353152            | FN     |
| HP:0002024 | Malabsorption                     | 9139143              | FN     | HP:0001409 | Portal hypertension             | 16001677            | FN     |
| HP:0003077 | Hyperlipidemia                    | 22487474             | FN     | HP:0003418 | Back pain                       | 12170706            | FN     |
| HP:0002014 | Diarrhea                          | 9168660              | FN     | HP:0001824 | Weight loss                     | 15986640            | FN     |
| HP:0002586 | Peritonitis                       | 15500780             | FN     | HP:0001945 | Fever                           | 15273919            | FN     |
| HP:0100867 | Duodenal stenosis                 | 17198198<br>12383218 | FN     | HP:0002574 | Episodic abdominal pain         | 19697839            | FN     |
| HP:0002013 | Vomiting                          | 15841034             | FN     | HP:0002573 | Hematochezia                    | 17148930            | FN     |
| HP:0003270 | Abdominal distention              | 18516005             | FN     | HP:0001698 | Pericardial effusion            | 9231991<br>12439127 | FN     |
| HP:0002249 | Melena                            | 17925742             | FN     |            |                                 |                     |        |



**Table S22.** Overview of HPO annotations for **Angioedema** that were derived by concept recognition in PubMed using BioLark. There were 27 true positives, 24 false positives, and 47 false negatives.

| ID         | Name                             | pmid     | status | ID         | Name                                    | pmid     | status |
|------------|----------------------------------|----------|--------|------------|-----------------------------------------|----------|--------|
| HP:0100665 | Angioedema                       | 7083632  | TP     | HP:0001025 | Urticaria                               | 7083632  | TP     |
| HP:0012027 | Laryngeal edema                  | 18030852 | TP     | HP:0002027 | Abdominal pain                          | 11823949 | TP     |
| HP:0002099 | Asthma                           |          | FP     | HP:0100845 | Anaphylactic shock                      | 17244953 | TP     |
| HP:0004431 | Complement deficiency            |          | FP     | HP:0010783 | Erythema                                | -        | TP     |
| HP:0002781 | Upper airway obstruction         | 8599504  | TP     | HP:0001880 | Eosinophilia                            |          | FP     |
| HP:0000822 | Hypertension                     |          | FP     | HP:0002574 | Episodic abdominal pain                 | 5511819  | TP     |
| HP:0000282 | Facial edema                     | 12139356 | TP     | HP:0002725 | Systemic lupus erythematosus            |          | FP     |
| HP:0000964 | Eczema                           |          | FP     | HP:0002615 | Hypotension                             | 11842287 | TP     |
| HP:0005523 | Lymphoproliferative disorder     |          | FP     | HP:0002013 | Vomiting                                | 17343080 | TP     |
| HP:0001541 | Ascites                          | 17285209 | TP     | HP:0001047 | Atopic dermatitis                       |          | FP     |
| HP:0001635 | Congestive heart failure         |          | FP     | HP:0002014 | Diarrhea                                | 16464219 | TP     |
| HP:0002098 | Respiratory distress             | 12829880 | TP     | HP:0002665 | Lymphoma                                |          | FP     |
| HP:0005945 | Laryngeal obstruction            | 17487816 | TP     | HP:0002094 | Dyspnea                                 | 17694700 | TP     |
| HP:0011458 | Abdominal symptom                | 8438855  | TP     | HP:0100646 | Thyroiditis                             |          | FP     |
| HP:0100495 | Mastocytosis                     |          | FP     | HP:0002017 | Nausea and vomiting                     |          | FP     |
| HP:0011855 | Pharyngeal edema                 | 6649745  | TP     | HP:0005225 | Intestinal edema                        | 1215911  | TP     |
| HP:0003365 | Arthralgia of the hip            |          | FP     | HP:0002015 | Dysphagia                               | 17296538 | TP     |
| HP:0002018 | Nausea                           |          | FP     | HP:0003193 | Allergic rhinitis                       |          | FP     |
| HP:0000099 | Glomerulonephritis               |          | FP     | HP:0010307 | Stridor                                 | 17487816 | TP     |
| HP:0003493 | Antinuclear antibody positivity  |          | FP     | HP:0100539 | Periorbital edema                       | 21570492 | TP     |
| HP:0002527 | Falls                            |          | FP     | HP:0001369 | Arthritis                               |          | FP     |
| HP:0007430 | Generalized edema                | 1611187  | TP     | HP:0005550 | Chronic lymphatic leukemia              |          | FP     |
| HP:0002576 | Intussusception                  | 16464219 | TP     | HP:0001386 | Joint swelling                          | 1249347  | TP     |
| HP:0001279 | Syncope                          |          | FP     | HP:0002037 | Inflammation of the large intestine     | 22408362 | TP     |
| HP:0004791 | Esophageal ulceration            |          | FP     | HP:0006775 | Multiple myeloma                        |          | FP     |
| HP:0010742 | Edema of the upper limbs         | 1650077  | TP     | HP:0010749 | Blepharochalasis                        | 18319025 | FN     |
| HP:0006511 | Laryngeal stridor                | 2700663  | FN     | HP:0000158 | Macroglossia                            | 21495883 | FN     |
| HP:0002307 | Drooling                         | 18036423 | FN     | HP:0001609 | Hoarse voice                            | 3071076  | FN     |
| HP:0000988 | Skin rash                        | 1514010  | FN     | HP:0009763 | Limb pain                               | 9542615  | FN     |
| HP:0003270 | Abdominal distention             | 11823949 | FN     | HP:0002321 | Vertigo                                 | 22791189 | FN     |
| HP:0002202 | Pleural effusion                 | 11524698 | FN     | HP:0100749 | Chest pain                              | 14696809 | FN     |
| HP:0001945 | Fever                            | 20873964 | FN     | HP:0002960 | Autoimmunity                            | 17547847 | FN     |
| HP:0011848 | Abdominal colic                  | 10525217 | FN     | HP:0010808 | Protruding tongue                       | 8599504  | FN     |
| HP:0005339 | Abnormality of complement system | 589782   | FN     | HP:0003565 | Elevated erythrocyte sedimentation rate | 3823366  | FN     |
| HP:0001742 | Nasal obstruction                | 2814292  | FN     | HP:0005521 | Disseminated intravascular coagulation  | 341410   | FN     |
| HP:0004796 | Gastrointestinal obstruction     | 23137231 | FN     | HP:0003496 | Increased IgM level                     | 9873168  | FN     |
| HP:0005348 | Inspiratory stridor              | -        | FN     | HP:0002880 | Respiratory difficulties                | 10887769 | FN     |
| HP:0002789 | Tachypnea                        | 16230465 | FN     | HP:0011106 | Hypovolemia                             | 16271103 | FN     |
| HP:0000508 | Ptosis                           | 19298902 | FN     | HP:0100724 | Hypercoagulability                      | 9652897  | FN     |
| HP:0100598 | Pulmonary edema                  | 269002   | FN     | HP:0000967 | Petechiae                               | 6627625  | FN     |
| HP:0001618 | Dysphonia                        | 16267649 | FN     | HP:0001260 | Dysarthria                              | 8358121  | FN     |

*continued on the next page*

**Table S22. Angioedema – continued**

| <b>ID</b>  | <b>Name</b>                 | <b>pmid</b> | <b>status</b> | <b>ID</b>  | <b>Name</b>                  | <b>pmid</b> | <b>status</b> |
|------------|-----------------------------|-------------|---------------|------------|------------------------------|-------------|---------------|
| HP:0002113 | Pulmonary infiltrates       | 3264480     | FN            | HP:0000520 | Proptosis                    | 1911519     | FN            |
| HP:0002093 | Respiratory insufficiency   | 1963718     | FN            | HP:0100326 | Immunologic hypersensitivity | 8959545     | FN            |
| HP:0000232 | Everted lower lip vermilion | 267704      | FN            | HP:0001225 | Wrist swelling               | 11315937    | FN            |
| HP:0001041 | Facial erythema             | 17505688    | FN            | HP:0100540 | Palpebral edema              | 17694700    | FN            |
| HP:0001741 | Phimosis                    | 22560272    | FN            | HP:0010741 | Edema of the lower limbs     | 15924048    | FN            |
| HP:0000157 | Abnormality of the tongue   | 10619346    | FN            | HP:0004313 | Hypogammaglobulinemia        | 3405564     | FN            |
| HP:0005214 | Intestinal obstruction      | 17395288    | FN            | HP:0005268 | Spontaneous abortion         | -           | FN            |
| HP:0002890 | Thyroid carcinoma           | 7170879     | FN            | HP:0001928 | Abnormality of coagulation   | -           | FN            |

**Table S23.** Overview of HPO annotations for **Phototoxic Dermatitis** that were derived by concept recognition in PubMed using BioLark. There were 7 true positives, 10 false positives, and 1 false negatives.

| ID         | Name                          | pmid     | status | ID         | Name                             | pmid     | status |
|------------|-------------------------------|----------|--------|------------|----------------------------------|----------|--------|
| HP:0000992 | Cutaneous photosensitivity    |          | FP     | HP:0010783 | Erythema                         |          | FP     |
| HP:0000737 | Irritability                  |          | FP     | HP:0000964 | Eczema                           | 10438232 | TP     |
| HP:0007354 | Amyotrophic lateral sclerosis |          | FP     | HP:0001000 | Abnormality of skin pigmentation | -        | TP     |
| HP:0000969 | Edema                         | 17223870 | TP     | HP:0001324 | Muscle weakness                  |          | FP     |
| HP:0007537 | Severe photosensitivity       | 11868977 | TP     | HP:0008066 | Abnormal blistering of the skin  | 17459294 | TP     |
| HP:0003765 | Psoriasis                     |          | FP     | HP:0000613 | Photophobia                      |          | FP     |
| HP:0001025 | Urticaria                     |          | FP     | HP:0002860 | Squamous cell carcinoma          |          | FP     |
| HP:0002861 | Malignant melanoma            |          | FP     | HP:0000989 | Pruritus                         | 19138025 | TP     |
| HP:0000953 | Hyperpigmentation of the skin | 19687425 | TP     | HP:0001806 | Onycholysis                      | 17688387 | FN     |

**Table S24.** Overview of HPO annotations for **Dyshidrotic Eczema** that were derived by concept recognition in PubMed using BioLark. There were 5 true positives, 2 false positives, and 5 false negatives.

| ID         | Name                       | pmid     | status | ID         | Name                   | pmid     | status |
|------------|----------------------------|----------|--------|------------|------------------------|----------|--------|
| HP:0000964 | Eczema                     | 11011918 | TP     | HP:0000975 | Hyperhidrosis          | 1293189  | TP     |
| HP:0001047 | Atopic dermatitis          |          | FP     | HP:0000989 | Pruritus               | 22545332 | TP     |
| HP:0007410 | Palmoplantar hyperhidrosis | 8982415  | TP     | HP:0010783 | Erythema               | 22691103 | TP     |
| HP:0003765 | Psoriasis                  |          | FP     | HP:0008391 | Dystrophic fingernails | 19076887 | FN     |
| HP:0007446 | Palmoplantar blistering    | 8113043  | FN     | HP:0001065 | Striae distensae       | 11395652 | FN     |
| HP:0003212 | Increased IgE level        | 14616819 | FN     | HP:0000988 | Skin rash              | 22738245 | FN     |

**Table S25.** Overview of HPO annotations for **Viral Encephalitis** that were derived by concept recognition in PubMed using BioLark. There were 17 true positives, 32 false positives, and 32 false negatives.

| ID         | Name                             | pmid                             | status | ID         | Name                                                         | pmid                             | status |
|------------|----------------------------------|----------------------------------|--------|------------|--------------------------------------------------------------|----------------------------------|--------|
| HP:0002383 | Encephalitis                     | -                                | TP     | HP:0001298 | Encephalopathy                                               |                                  | FP     |
| HP:0001287 | Meningitis                       |                                  | FP     | HP:0001250 | Seizures                                                     |                                  | FP     |
| HP:0001945 | Fever                            | 10349352<br>11858542<br>17326940 | TP     | HP:0002721 | Immunodeficiency                                             |                                  | FP     |
| HP:0006846 | Acute encephalopathy             | 11857527                         | TP     | HP:0011096 | Peripheral demyelination                                     |                                  | FP     |
| HP:0001259 | Coma                             | 11022140                         | TP     | HP:0002373 | Febrile seizures                                             |                                  | FP     |
| HP:0002181 | Cerebral edema                   | 15461026                         | TP     | HP:0001974 | Leukocytosis                                                 |                                  | FP     |
| HP:0002331 | Headache (with pheochromocytoma) |                                  | FP     | HP:0003470 | Paralysis                                                    |                                  | FP     |
| HP:0011450 | CNS infection                    |                                  | FP     | HP:0001289 | Confusion                                                    | 23307455                         | TP     |
| HP:0000726 | Dementia                         |                                  | FP     | HP:0001251 | Ataxia                                                       | 9471108                          | TP     |
| HP:0003881 | Humeral sclerosis                |                                  | FP     | HP:0001025 | Urticaria                                                    |                                  | FP     |
| HP:0002133 | Status epilepticus               | 11022140                         | TP     | HP:0002354 | Memory impairment                                            |                                  | FP     |
| HP:0002171 | Gliosis                          | 7472530<br>12126146              | TP     | HP:0002960 | Autoimmunity                                                 |                                  | FP     |
| HP:0001336 | Myoclonus                        |                                  | FP     | HP:0002719 | Recurrent infections                                         |                                  | FP     |
| HP:0006980 | Leukoencephalopathy, progressive | 19001657                         | TP     | HP:0010280 | Stomatitis                                                   |                                  | FP     |
| HP:0002665 | Lymphoma                         |                                  | FP     | HP:0002329 | Drowsiness                                                   | 11858542                         | TP     |
| HP:0100598 | Pulmonary edema                  |                                  | FP     | HP:0006965 | Acute necrotizing encephalopathy                             | 12116748<br>21801621             | TP     |
| HP:0001324 | Muscle weakness                  |                                  | FP     | HP:0002013 | Vomiting                                                     | 9471108                          | TP     |
| HP:0002633 | Vasculitis                       |                                  | FP     | HP:0011947 | Respiratory tract infection                                  |                                  | FP     |
| HP:0002093 | Respiratory insufficiency        |                                  | FP     | HP:0001269 | Hemiparesis                                                  | 18045307<br>12353193             | TP     |
| HP:0003006 | Neuroblastoma                    |                                  | FP     | HP:0000639 | Nystagmus                                                    | 11857527<br>20544248             | TP     |
| HP:0001297 | Stroke                           |                                  | FP     | HP:0002045 | Hypothermia                                                  |                                  | FP     |
| HP:0002084 | Encephalocele                    |                                  | FP     | HP:0010543 | Opsoclonus                                                   | 9103875                          | TP     |
| HP:0002301 | Hemiplegia                       | 16638508                         | TP     | HP:0006530 | Interstitial pulmonary disease                               |                                  | FP     |
| HP:0002179 | Opisthotonus                     |                                  | FP     | HP:0001285 | Spastic tetraparesis                                         |                                  | FP     |
| HP:0006957 | Loss of ability to walk          |                                  | FP     | HP:0007307 | Rapid neurologic deterioration                               | 23107158                         | FN     |
| HP:0002922 | Increased CSF protein            | 11809148                         | FN     | HP:0005318 | Cerebral vasculitis                                          | 11118800                         | FN     |
| HP:0002448 | Progressive encephalopathy       | 8666375<br>14749962              | FN     | HP:0002446 | Astrocytosis                                                 | 22797933                         | FN     |
| HP:0002300 | Mutism                           | 16847369<br>16776434             | FN     | HP:0002367 | Visual hallucinations                                        | 12134688<br>12690279             | FN     |
| HP:0000741 | Apathy                           | 22790284                         | FN     | HP:0002384 | Focal seizures with impairment of consciousness or awareness | 11022140                         | FN     |
| HP:0000751 | Personality changes              | 23307455                         | FN     | HP:0001262 | Somnolence                                                   | 18021926                         | FN     |
| HP:0002516 | Increased intracranial pressure  | 17074607                         | FN     | HP:0002072 | Chorea                                                       | 23307455                         | FN     |
| HP:0007185 | Loss of consciousness            | 10191896                         | FN     | HP:0001254 | Lethargy                                                     | 23607233                         | FN     |
| HP:0002059 | Cerebral atrophy                 | 15626538                         | FN     | HP:0002902 | Hyponatremia                                                 | 23173742                         | FN     |
| HP:0002353 | EEG abnormality                  | 16047296                         | FN     | HP:0000713 | Agitation                                                    | 15730900<br>16283448<br>20549967 | FN     |
| HP:0002381 | Aphasia                          | 16909792                         | FN     | HP:0010628 | Facial palsy                                                 | 11890853                         | FN     |

*continued on the next page*

**Table S25. Viral Encephalitis – continued**

| <b>ID</b>  | <b>Name</b>                       | <b>pmid</b>                                 | <b>status</b> | <b>ID</b>  | <b>Name</b>                            | <b>pmid</b> | <b>status</b> |
|------------|-----------------------------------|---------------------------------------------|---------------|------------|----------------------------------------|-------------|---------------|
| HP:0100785 | Insomnia                          | 22971937<br>11706967<br>7555630<br>14679780 | FN            | HP:0006824 | Cranial nerve paralysis                | 17116698    | FN            |
| HP:0002197 | Generalized seizures              | 11022140                                    | FN            | HP:0001337 | Tremor                                 | 15077022    | FN            |
| HP:0004305 | Involuntary movements             | 7702698                                     | FN            | HP:0002921 | Abnormality of the cerebrospinal fluid | -           | FN            |
| HP:0000737 | Irritability                      | 22357720                                    | FN            | HP:0001266 | Choreoathetosis                        | 10513697    | FN            |
| HP:0002069 | Generalized tonic-clonic seizures | -                                           | FN            | HP:0002315 | Headache                               | 12757229    | FN            |
| HP:0008765 | Auditory hallucinations           | 16047296                                    | FN            |            |                                        |             |               |

**Table S26.** Overview of HPO annotations for **Isaacs Syndrome** that were derived by concept recognition in PubMed using BioLark. There were 17 true positives, 9 false positives, and 15 false negatives.

| ID         | Name                          | pmid     | status | ID         | Name                           | pmid     | status |
|------------|-------------------------------|----------|--------|------------|--------------------------------|----------|--------|
| HP:0002411 | Myokymia                      | 15257376 | TP     | HP:0003473 | Fatigable weakness             |          | FP     |
| HP:0003394 | Muscle cramps                 | 15257376 | TP     | HP:0003552 | Muscle stiffness               | 16770779 | TP     |
| HP:0100522 | Thymoma                       | 20420181 | TP     | HP:0002960 | Autoimmunity                   | 18801496 | TP     |
| HP:0002380 | Fasciculations                | 16770779 | TP     | HP:0000651 | Diplopia                       | 17633107 | TP     |
| HP:0000975 | Hyperhidrosis                 | 15257376 | TP     | HP:0002131 | Episodic ataxia                |          | FP     |
| HP:0002383 | Encephalitis                  |          | FP     | HP:0001250 | Seizures                       |          | FP     |
| HP:0009830 | Peripheral neuropathy         | 17114847 | TP     | HP:0002486 | Myotonia                       | 12691809 | TP     |
| HP:0003401 | Paresthesia                   | 18801496 | TP     | HP:0001251 | Ataxia                         |          | FP     |
| HP:0100785 | Insomnia                      | 17114847 | TP     | HP:0002459 | Dysautonomia                   |          | FP     |
| HP:0000577 | Exotropia                     | 18607604 | TP     | HP:0003712 | Muscle hypertrophy             | 20382536 | TP     |
| HP:0000486 | Strabismus                    | 18377936 | TP     | HP:0001260 | Dysarthria                     | 11360270 | TP     |
| HP:0003470 | Paralysis                     |          | FP     | HP:0001289 | Confusion                      |          | FP     |
| HP:0008978 | Necrotizing myopathy          |          | FP     | HP:0001371 | Flexion contracture            | 17048446 | TP     |
| HP:0002063 | Rigidity                      | 21576838 | FN     | HP:0001324 | Muscle weakness                | 10768605 | FN     |
| HP:0002355 | Difficulty walking            | 17048446 | FN     | HP:0000508 | Ptosis                         | 23337349 | FN     |
| HP:0002019 | Constipation                  | 15753614 | FN     | HP:0000317 | Facial myokymia                | 12766989 | FN     |
| HP:0008981 | Calf muscle hypertrophy       | 16607862 | FN     | HP:0010546 | Muscle fibrillation            | 19679588 | FN     |
| HP:0009473 | Joint contracture of the hand | 17048446 | FN     | HP:0000565 | Esotropia                      | 17204915 | FN     |
| HP:0009763 | Limb pain                     | 16934467 | FN     | HP:0001311 | Neurophysiological abnormality | 16570308 | FN     |
| HP:0010628 | Facial palsy                  | 17114847 | FN     | HP:0002015 | Dysphagia                      | 17486731 | FN     |
| HP:0000737 | Irritability                  | 17114847 | FN     |            |                                |          |        |

**Table S27.** Overview of HPO annotations for **Tibial Neuropathy** that were derived by concept recognition in PubMed using BioLark. There were 5 true positives, 3 false positives, and 5 false negatives.

| ID         | Name                                | pmid     | status | ID         | Name               | pmid     | status |
|------------|-------------------------------------|----------|--------|------------|--------------------|----------|--------|
| HP:0003450 | Axonal regeneration                 | 18078754 | TP     | HP:0000763 | Sensory neuropathy | -        | TP     |
| HP:0003202 | Amyotrophy                          | 20483119 | TP     | HP:0001324 | Muscle weakness    | -        | TP     |
| HP:0011096 | Peripheral demyelination            |          | FP     | HP:0009831 | Mononeuropathy     | -        | TP     |
| HP:0002617 | Aneurysm                            |          | FP     | HP:0100537 | Fasciitis          |          | FP     |
| HP:0003470 | Paralysis                           | 21284369 | FN     | HP:0100963 | Hyperesthesia      | 7794070  | FN     |
| HP:0000762 | Decreased nerve conduction velocity | 21284369 | FN     | HP:0003401 | Paresthesia        | 21600444 | FN     |
| HP:0001288 | Gait disturbance                    | 3970662  | FN     |            |                    |          |        |



**Table S28.** Overview of HPO annotations for **Adult T-Cell Leukemia Lymphoma** that were derived by concept recognition in PubMed using BioLark. There were 13 true positives, 46 false positives, and 23 false negatives.

| ID         | Name                                          | pmid                            | status | ID         | Name                                          | pmid                 | status |
|------------|-----------------------------------------------|---------------------------------|--------|------------|-----------------------------------------------|----------------------|--------|
| HP:0005517 | T-cell lymphoma/leukemia                      | 10397475                        | TP     | HP:0001909 | Leukemia                                      |                      | FP     |
| HP:0006721 | Acute lymphatic leukemia                      |                                 | FP     | HP:0002665 | Lymphoma                                      |                      | FP     |
| HP:0002196 | Myelopathy                                    |                                 | FP     | HP:0002488 | Acute leukemia                                |                      | FP     |
| HP:0000718 | Aggressive behavior                           |                                 | FP     | HP:0003072 | Hypercalcemia                                 | 18042693             | TP     |
| HP:0005526 | Lymphoid leukemia                             |                                 | FP     | HP:0004808 | Acute myeloid leukemia                        |                      | FP     |
| HP:0002716 | Lymphadenopathy                               | 11798657                        | TP     | HP:0004332 | Abnormality of lymphocytes                    |                      | FP     |
| HP:0002721 | Immunodeficiency                              |                                 | FP     | HP:0005523 | Lymphoproliferative disorder                  |                      | FP     |
| HP:0004430 | Severe combined immunodeficiency              |                                 | FP     | HP:0001433 | Hepatosplenomegaly                            | 19684985             | TP     |
| HP:0005550 | Chronic lymphatic leukemia                    |                                 | FP     | HP:0004377 | Hematological neoplasm                        |                      | FP     |
| HP:0002843 | Abnormality of T cells                        |                                 | FP     | HP:0001945 | Fever                                         | 11798657             | TP     |
| HP:0001744 | Splenomegaly                                  | 10996836                        | TP     | HP:0001974 | Leukocytosis                                  | 1920841              | TP     |
| HP:0000554 | Uveitis                                       |                                 | FP     | HP:0001875 | Neutropenia                                   |                      | FP     |
| HP:0001324 | Muscle weakness                               |                                 | FP     | HP:0007354 | Amyotrophic lateral sclerosis                 |                      | FP     |
| HP:0005558 | Chronic leukemia                              |                                 | FP     | HP:0001873 | Thrombocytopenia                              |                      | FP     |
| HP:0100827 | Lymphocytosis                                 | 15353320                        | TP     | HP:0002090 | Pneumonia                                     |                      | FP     |
| HP:0008940 | Generalized lymphadenopathy                   | 15353320                        | TP     | HP:0002240 | Hepatomegaly                                  | 10495418             | TP     |
| HP:0001903 | Anemia                                        |                                 | FP     | HP:0002960 | Autoimmunity                                  |                      | FP     |
| HP:0002202 | Pleural effusion                              |                                 | FP     | HP:0009919 | Retinoblastoma                                |                      | FP     |
| HP:0004836 | Acute promyelocytic leukemia                  |                                 | FP     | HP:0009824 | Hypoplasia involving bones of the upper limbs |                      | FP     |
| HP:0002863 | Myelodysplasia                                |                                 | FP     | HP:0001251 | Ataxia                                        |                      | FP     |
| HP:0001009 | Telangiectasia                                |                                 | FP     | HP:0002719 | Recurrent infections                          |                      | FP     |
| HP:0000964 | Eczema                                        |                                 | FP     | HP:0002835 | Aspiration                                    |                      | FP     |
| HP:0006775 | Multiple myeloma                              |                                 | FP     | HP:0008069 | Neoplasm of the skin                          |                      | FP     |
| HP:0005531 | Biphenotypic acute leukaemia                  |                                 | FP     | HP:0004845 | Acute monocytic leukemia                      |                      | FP     |
| HP:0002094 | Dyspnea                                       |                                 | FP     | HP:0005506 | Chronic myelogenous leukemia                  |                      | FP     |
| HP:0010783 | Erythema                                      | 1942589                         | TP     | HP:0004820 | Acute myelomonocytic leukemia                 |                      | FP     |
| HP:0000952 | Jaundice                                      | 11798657                        | TP     | HP:0001000 | Abnormality of skin pigmentation              |                      | FP     |
| HP:0005547 | Myeloproliferative disorder                   |                                 | FP     | HP:0001882 | Leukopenia                                    | 2975453              | TP     |
| HP:0011945 | Bronchiolitis obliterans organizing pneumonia |                                 | FP     | HP:0011946 | Bronchiolitis obliterans                      |                      | FP     |
| HP:0001888 | Lymphopenia                                   |                                 | FP     | HP:0001019 | Erythroderma                                  | 17938020             | FN     |
| HP:0001482 | Subcutaneous nodules                          | 9010100                         | FN     | HP:0000988 | Skin rash                                     | 18516870             | FN     |
| HP:0002113 | Pulmonary infiltrates                         | 1321303                         | FN     | HP:0001698 | Pericardial effusion                          | 1658079              | FN     |
| HP:0003401 | Paresthesia                                   | 18035189<br>1662570<br>12350404 | FN     | HP:0002797 | Osteolysis                                    | 16093798             | FN     |
| HP:0001876 | Pancytopenia                                  | 11798657                        | FN     | HP:0001880 | Eosinophilia                                  | 11798657             | FN     |
| HP:0006530 | Interstitial pulmonary disease                | 8331846<br>22578413             | FN     | HP:0002039 | Anorexia                                      | 3204683              | FN     |
| HP:0002014 | Diarrhea                                      | 3204683                         | FN     | HP:0100806 | Sepsis                                        | 16093798             | FN     |
| HP:0001824 | Weight loss                                   | 15148763<br>11257818            | FN     | HP:0010702 | Hypergammaglobulinemia                        | 3067902              | FN     |
| HP:0010628 | Facial palsy                                  | 19684985                        | FN     | HP:0002653 | Bone pain                                     | 9643532              | FN     |
| HP:0002756 | Pathologic fracture                           | 12432996                        | FN     | HP:0200023 | Priapism                                      | 15537405<br>10220081 | FN     |
| HP:0002249 | Melena                                        | 3204683                         | FN     | HP:0011974 | Myelofibrosis                                 | 14715100             | FN     |

*continued on the next page*

**Table S28. Adult T-Cell Leukemia Lymphoma – continued**

| <b>ID</b>  | <b>Name</b> | <b>pmid</b>          | <b>status</b> | <b>ID</b>  | <b>Name</b>               | <b>pmid</b> | <b>status</b> |
|------------|-------------|----------------------|---------------|------------|---------------------------|-------------|---------------|
| HP:0000979 | Purpura     | 17973821<br>23224072 | FN            | HP:0100828 | Increase in T cell number | -           | FN            |

**Table S29.** Overview of HPO annotations for **Plasma Cell Leukemia** that were derived by concept recognition in PubMed using BioLark. There were 14 true positives, 15 false positives, and 10 false negatives.

| ID         | Name                          | pmid                                      | status | ID         | Name                                          | pmid                 | status |
|------------|-------------------------------|-------------------------------------------|--------|------------|-----------------------------------------------|----------------------|--------|
| HP:0006775 | Multiple myeloma              |                                           | FP     | HP:0001909 | Leukemia                                      |                      | FP     |
| HP:0011857 | Plasmacytoma                  | 21229400<br>9750458                       | TP     | HP:0000718 | Aggressive behavior                           |                      | FP     |
| HP:0002665 | Lymphoma                      |                                           | FP     | HP:0001903 | Anemia                                        | 7571482              | TP     |
| HP:0001873 | Thrombocytopenia              | 20391976                                  | TP     | HP:0000083 | Renal insufficiency                           | 11166824             | TP     |
| HP:0002488 | Acute leukemia                |                                           | FP     | HP:0003072 | Hypercalcemia                                 | 11166824             | TP     |
| HP:0002835 | Aspiration                    |                                           | FP     | HP:0005550 | Chronic lymphatic leukemia                    |                      | FP     |
| HP:0002653 | Bone pain                     | 20391976                                  | TP     | HP:0000093 | Proteinuria                                   | 1770327              | TP     |
| HP:0001433 | Hepatosplenomegaly            | 3116673                                   | TP     | HP:0005526 | Lymphoid leukemia                             |                      | FP     |
| HP:0001635 | Congestive heart failure      |                                           | FP     | HP:0006721 | Acute lymphatic leukemia                      |                      | FP     |
| HP:0005508 | Waldenstrom macroglobulinemia |                                           | FP     | HP:0005523 | Lymphoproliferative disorder                  |                      | FP     |
| HP:0010702 | Hypergammaglobulinemia        | 8086511<br>1578643<br>16454587<br>9796403 | TP     | HP:0001974 | Leukocytosis                                  | 1942529              | TP     |
| HP:0011034 | Amyloidosis                   |                                           | FP     | HP:0001324 | Muscle weakness                               |                      | FP     |
| HP:0002202 | Pleural effusion              | 15078773<br>823757                        | TP     | HP:0009824 | Hypoplasia involving bones of the upper limbs |                      | FP     |
| HP:0001744 | Splenomegaly                  | 11166824                                  | TP     | HP:0002716 | Lymphadenopathy                               | 3116673              | TP     |
| HP:0002240 | Hepatomegaly                  | 3116673                                   | TP     | HP:0100806 | Sepsis                                        | 3920242              | FN     |
| HP:0001824 | Weight loss                   | 12185504<br>18854288                      | FN     | HP:0002090 | Pneumonia                                     | 2652343              | FN     |
| HP:0001945 | Fever                         | 16304856                                  | FN     | HP:0100827 | Lymphocytosis                                 | 15938728<br>10774246 | FN     |
| HP:0011974 | Myelofibrosis                 | 403845                                    | FN     | HP:0001919 | Acute renal failure                           | 16844565             | FN     |
| HP:0002797 | Osteolysis                    | 17453381                                  | FN     | HP:0001875 | Neutropenia                                   | 17675269             | FN     |
| HP:0001876 | Pancytopenia                  | 687831                                    | FN     |            |                                               |                      |        |

**Table S30.** Overview of HPO annotations for **Meningioma** that were derived by concept recognition in PubMed using BioLark. There were 17 true positives, 73 false positives, and 47 false negatives.

| ID         | Name                                          | pmid                 | status | ID         | Name                               | pmid               | status |
|------------|-----------------------------------------------|----------------------|--------|------------|------------------------------------|--------------------|--------|
| HP:0002858 | Meningioma                                    | 7079409              | TP     | HP:0100009 | Intracranial meningioma            | 6805281            | TP     |
| HP:0009733 | Glioma                                        |                      | FP     | HP:0100008 | Schwannoma                         |                    | FP     |
| HP:0001287 | Meningitis                                    |                      | FP     | HP:0009588 | Vestibular Schwannoma              |                    | FP     |
| HP:0001067 | Neurofibromas                                 |                      | FP     | HP:0100843 | Glioblastoma                       |                    | FP     |
| HP:0100010 | Spinal meningioma                             | 18485685             | TP     | HP:0000718 | Aggressive behavior                |                    | FP     |
| HP:0002331 | Headache (with pheochromocytoma)              |                      | FP     | HP:0009592 | Astrocytoma                        |                    | FP     |
| HP:0000969 | Edema                                         |                      | FP     | HP:0002893 | Pituitary adenoma                  |                    | FP     |
| HP:0002181 | Cerebral edema                                | 7242894              | TP     | HP:0001250 | Seizures                           |                    | FP     |
| HP:0002888 | Ependymoma                                    |                      | FP     | HP:0010302 | Spinal cord tumor                  |                    | FP     |
| HP:0002885 | Medulloblastoma                               |                      | FP     | HP:0000520 | Proptosis                          |                    | FP     |
| HP:0000246 | Sinusitis                                     |                      | FP     | HP:0001269 | Hemiparesis                        | 12826353           | TP     |
| HP:0100006 | Neoplasm of the central nervous system        |                      | FP     | HP:0010762 | Chordoma                           |                    | FP     |
| HP:0010797 | Hemangioblastoma                              |                      | FP     | HP:0100774 | Hyperostosis                       |                    | FP     |
| HP:0000572 | Visual loss                                   |                      | FP     | HP:0000365 | Hearing impairment                 |                    | FP     |
| HP:0001324 | Muscle weakness                               |                      | FP     | HP:0003002 | Breast carcinoma                   |                    | FP     |
| HP:0000651 | Diplopia                                      | 12826353             | TP     | HP:0010628 | Facial palsy                       | 22236763           | TP     |
| HP:0000505 | Visual impairment                             |                      | FP     | HP:0000529 | Progressive visual loss            | 12812948           | TP     |
| HP:0100661 | Trigeminal neuralgia                          |                      | FP     | HP:0001123 | Visual field defect                |                    | FP     |
| HP:0009734 | Optic glioma                                  |                      | FP     | HP:0100026 | Arteriovenous malformation         |                    | FP     |
| HP:0000648 | Optic atrophy                                 |                      | FP     | HP:0004944 | Cerebral aneurysm                  |                    | FP     |
| HP:0002617 | Aneurysm                                      |                      | FP     | HP:0002321 | Vertigo                            | 12826353           | TP     |
| HP:0002835 | Aspiration                                    |                      | FP     | HP:0010799 | Pinealoma                          |                    | FP     |
| HP:0001085 | Papilledema                                   | 11018836             | TP     | HP:0002668 | Paraganglioma                      |                    | FP     |
| HP:0007807 | Optic nerve compression                       | 17019421             | TP     | HP:0011750 | Neoplasm of the anterior pituitary |                    | FP     |
| HP:0001138 | Optic neuropathy                              |                      | FP     | HP:0001048 | Cavernous hemangioma               |                    | FP     |
| HP:0000360 | Tinnitus                                      | 12836076             | TP     | HP:0001362 | Skull defect                       |                    | FP     |
| HP:0009792 | Teratoma                                      |                      | FP     | HP:0002138 | Subarachnoid hemorrhage            | 1664596<br>1085038 | TP     |
| HP:0001028 | Hemangioma                                    |                      | FP     | HP:0009589 | Bilateral vestibular Schwannoma    |                    | FP     |
| HP:0000822 | Hypertension                                  |                      | FP     | HP:0200022 | Choroid plexus papilloma           |                    | FP     |
| HP:0006765 | Chondrosarcoma                                |                      | FP     | HP:0009830 | Peripheral neuropathy              |                    | FP     |
| HP:0005584 | Renal cell carcinoma                          |                      | FP     | HP:0001297 | Stroke                             |                    | FP     |
| HP:0003881 | Humeral sclerosis                             |                      | FP     | HP:0000458 | Anosmia                            | 21840726           | TP     |
| HP:0002170 | Intracranial hemorrhage                       |                      | FP     | HP:0004947 | Arteriovenous fistula              |                    | FP     |
| HP:0001342 | Cerebral hemorrhage                           |                      | FP     | HP:0000508 | Ptosis                             | 20148271           | TP     |
| HP:0010828 | Hemifacial spasm                              | 11346028             | TP     | HP:0100646 | Thyroiditis                        |                    | FP     |
| HP:0002013 | Vomiting                                      |                      | FP     | HP:0100608 | Metrorrhagia                       |                    | FP     |
| HP:0009797 | Cholesteatoma                                 |                      | FP     | HP:0100309 | Subdural hemorrhage                | 1327621            | TP     |
| HP:0009824 | Hypoplasia involving bones of the upper limbs |                      | FP     | HP:0000265 | Mastoiditis                        |                    | FP     |
| HP:0100699 | Scarring                                      |                      | FP     | HP:0000602 | Ophthalmoplegia                    |                    | FP     |
| HP:0100246 | Osteoma                                       |                      | FP     | HP:0000024 | Prostatitis                        |                    | FP     |
| HP:0003001 | Glomus jugular tumor                          |                      | FP     | HP:0000873 | Diabetes insipidus                 |                    | FP     |
| HP:0100310 | Epidural hemorrhage                           |                      | FP     | HP:0006880 | Cerebellar hemangioblastoma        |                    | FP     |
| HP:0001291 | Abnormality of the cranial nerves             |                      | FP     | HP:0011695 | Cerebellar hemorrhage              |                    | FP     |
| HP:0009718 | Subependymal giant-cell astrocytoma           |                      | FP     | HP:0100634 | Neuroendocrine neoplasm            |                    | FP     |
| HP:0100570 | Carcinoid                                     |                      | FP     | HP:0009590 | Unilateral vestibular Schwannoma   |                    | FP     |
| HP:0005758 | Foramen magnum lesion                         | 2711319              | FN     | HP:0002423 | Long-tract signs                   | 22430127           | FN     |
| HP:0000543 | Optic disc pallor                             | 17548990<br>18421411 | FN     | HP:0002512 | Brain stem compression             | 20148271           | FN     |

*continued on the next page*

**Table S30. Meningioma – continued**

| <b>ID</b>  | <b>Name</b>                   | <b>pmid</b>          | <b>status</b> | <b>ID</b>  | <b>Name</b>                    | <b>pmid</b>                  | <b>status</b> |
|------------|-------------------------------|----------------------|---------------|------------|--------------------------------|------------------------------|---------------|
| HP:0004840 | Hypochromic microcytic anemia | 9452243<br>18987835  | FN            | HP:0001285 | Spastic tetraparesis           | 3885068                      | FN            |
| HP:0002078 | Truncal ataxia                | 11561352             | FN            | HP:0009916 | Anisocoria                     | 16331147                     | FN            |
| HP:0001133 | Constricted visual fields     | 7474790              | FN            | HP:0010534 | Transient global amnesia       | 3990976<br>21629022          | FN            |
| HP:0011349 | Abducens palsy                | 8677007<br>835387    | FN            | HP:0004409 | Hyposmia                       | 6449061                      | FN            |
| HP:0010523 | Alexia                        | 12826353             | FN            | HP:0000603 | Central scotoma                | 16793428<br>7132192          | FN            |
| HP:0001293 | Cranial nerve compression     | 16331147<br>16455530 | FN            | HP:0003487 | Babinski sign                  | 8677007                      | FN            |
| HP:0002312 | Clumsiness                    | 3885068<br>12233093  | FN            | HP:0000871 | Panhypopituitarism             | 8986165                      | FN            |
| HP:0002317 | Unsteady gait                 | 7520545              | FN            | HP:0007340 | Lower limb muscle weakness     | 16850962                     | FN            |
| HP:0002357 | Dysphasia                     | 7335302              | FN            | HP:0001334 | Communicating hydrocephalus    | 16776435<br>8205731          | FN            |
| HP:0010532 | Paroxysmal vertigo            | 9560091              | FN            | HP:0002355 | Difficulty walking             | 18548187                     | FN            |
| HP:0002073 | Progressive cerebellar ataxia | 3704430              | FN            | HP:0001730 | Progressive hearing impairment | 16792549                     | FN            |
| HP:0010524 | Agnosia                       | 7566392              | FN            | HP:0002066 | Gait ataxia                    | 12826353                     | FN            |
| HP:0002273 | Tetraparesis                  | 16917615             | FN            | HP:0002367 | Visual hallucinations          | 8729606                      | FN            |
| HP:0002427 | Motor aphasia                 | 2325489              | FN            | HP:0002277 | Horner syndrome                | 23230622                     | FN            |
| HP:0002313 | Spastic paraparesis           | 3249615              | FN            | HP:0002318 | Cervical myelopathy            | 2253423                      | FN            |
| HP:0001347 | Hyperreflexia                 | 18080720             | FN            | HP:0000751 | Personality changes            | 11386827                     | FN            |
| HP:0002301 | Hemiplegia                    | 17021731             | FN            | HP:0001260 | Dysarthria                     | 9736091                      | FN            |
| HP:0002176 | Spinal cord compression       | 12820045             | FN            | HP:0002353 | EEG abnormality                | 3990976<br>426936<br>1189455 | FN            |
| HP:0002797 | Osteolysis                    | 22836795             | FN            | HP:0002381 | Aphasia                        | 12826353                     | FN            |
| HP:0000639 | Nystagmus                     | 3871599              | FN            | HP:0007359 | Focal seizures                 | -                            | FN            |
| HP:0000975 | Hyperhidrosis                 | 6453259<br>12691806  | FN            | HP:0002197 | Generalized seizures           | 16910461                     | FN            |
| HP:0002354 | Memory impairment             | 23359077             | FN            |            |                                |                              |               |

**Table S31.** Overview of HPO annotations for **Budd-Chiari Syndrome** that were derived by concept recognition in PubMed using BioLark. There were 21 true positives, 32 false positives, and 7 false negatives.

| ID         | Name                                   | pmid                | status | ID         | Name                                  | pmid                             | status |
|------------|----------------------------------------|---------------------|--------|------------|---------------------------------------|----------------------------------|--------|
| HP:0002639 | Budd-Chiari syndrome                   | -                   | TP     | HP:0001541 | Ascites                               | 4058415                          | TP     |
| HP:0001409 | Portal hypertension                    | 18618075            | TP     | HP:0001394 | Cirrhosis                             |                                  | FP     |
| HP:0002240 | Hepatomegaly                           | 9462648             | TP     | HP:0100724 | Hypercoagulability                    |                                  | FP     |
| HP:0004936 | Venous thrombosis                      |                     | FP     | HP:0005547 | Myeloproliferative disorder           |                                  | FP     |
| HP:0001399 | Hepatic failure                        |                     | FP     | HP:0002619 | Varicose veins                        |                                  | FP     |
| HP:0001901 | Polycythemia                           |                     | FP     | HP:0002027 | Abdominal pain                        | 15695963                         | TP     |
| HP:0001402 | Hepatocellular carcinoma               | 9828703             | TP     | HP:0004818 | Paroxysmal nocturnal hemoglobinuria   |                                  | FP     |
| HP:0002040 | Esophageal varices                     | 12107787            | TP     | HP:0006554 | Acute hepatic failure                 | 2069474                          | TP     |
| HP:0002204 | Pulmonary embolism                     |                     | FP     | HP:0001894 | Thrombocytosis                        |                                  | FP     |
| HP:0000969 | Edema                                  | 4012606             | TP     | HP:0001744 | Splenomegaly                          | 12848215                         | TP     |
| HP:0001410 | Decreased liver function               | -                   | TP     | HP:0005543 | Reduced protein C activity            |                                  | FP     |
| HP:0003270 | Abdominal distention                   | 16295731            | TP     | HP:0002308 | Arnold-Chiari malformation            |                                  | FP     |
| HP:0002239 | Gastrointestinal hemorrhage            |                     | FP     | HP:0001433 | Hepatosplenomegaly                    | 1797212                          | TP     |
| HP:0000952 | Jaundice                               | 20387679            | TP     | HP:0001298 | Encephalopathy                        |                                  | FP     |
| HP:0003396 | Syringomyelia                          |                     | FP     | HP:0002910 | Elevated hepatic transaminases        | 19560555                         | TP     |
| HP:0003613 | Antiphospholipid antibody positivity   |                     | FP     | HP:0004420 | Arterial thrombosis                   |                                  | FP     |
| HP:0002605 | Hepatic necrosis                       |                     | FP     | HP:0100243 | Leiomyosarcoma                        |                                  | FP     |
| HP:0004855 | Reduced protein S activity             |                     | FP     | HP:0004419 | Recurrent thrombophlebitis            | 23373054                         | TP     |
| HP:0001976 | Reduced antithrombin III activity      |                     | FP     | HP:0002625 | Deep venous thrombosis                |                                  | FP     |
| HP:0001907 | Thromboembolism                        |                     | FP     | HP:0010741 | Edema of the lower limbs              | 4058415                          | TP     |
| HP:0006580 | Portal fibrosis                        | 16534866            | TP     | HP:0100523 | Liver abscess                         |                                  | FP     |
| HP:0003256 | Abnormality of the coagulation cascade |                     | FP     | HP:0100806 | Sepsis                                |                                  | FP     |
| HP:0001395 | Hepatic fibrosis                       | 8900915             | TP     | HP:0004448 | Fulminant hepatic failure             | 9399778                          | TP     |
| HP:0011874 | Heparin-induced thrombocytopenia       |                     | FP     | HP:0002633 | Vasculitis                            |                                  | FP     |
| HP:0001873 | Thrombocytopenia                       |                     | FP     | HP:0002202 | Pleural effusion                      |                                  | FP     |
| HP:0002248 | Hematemesis                            | 15185028            | TP     | HP:0000718 | Aggressive behavior                   |                                  | FP     |
| HP:0005521 | Disseminated intravascular coagulation |                     | FP     | HP:0003645 | Prolonged partial thromboplastin time | 12696825                         | FN     |
| HP:0001971 | Hypersplenism                          | 16534866            | FN     | HP:0002480 | Hepatic encephalopathy                | 15095845                         | FN     |
| HP:0003073 | Hypoalbuminemia                        | 9519690<br>3197587  | FN     | HP:0006846 | Acute encephalopathy                  | 16318042<br>1008048<br>2162656   | FN     |
| HP:0003155 | Elevated alkaline phosphatase          | 23143028<br>7724132 | FN     | HP:0002904 | Hyperbilirubinemia                    | 20112074<br>21074693<br>17763380 | FN     |

**Table S32.** Overview of HPO annotations for **Celiac Disease** that were derived by concept recognition in PubMed using BioLark. There were 30 true positives, 63 false positives, and 51 false negatives.

| ID         | Name                                | pmid     | status | ID         | Name                              | pmid               | status |
|------------|-------------------------------------|----------|--------|------------|-----------------------------------|--------------------|--------|
| HP:0002608 | Celiac disease                      | -        | TP     | HP:0011473 | Villous atrophy                   | 21901262           | TP     |
| HP:0002024 | Malabsorption                       | -        | TP     | HP:0002960 | Autoimmunity                      | -                  | TP     |
| HP:0002242 | Abnormality of the intestine        | -        | TP     | HP:0002570 | Steatorrhea                       | 6523389            | TP     |
| HP:0000964 | Eczema                              |          | FP     | HP:0002014 | Diarrhea                          | -                  | TP     |
| HP:0002720 | IgA deficiency                      |          | FP     | HP:0001903 | Anemia                            |                    | FP     |
| HP:0002665 | Lymphoma                            |          | FP     | HP:0100280 | Crohn's disease                   |                    | FP     |
| HP:0001824 | Weight loss                         |          | FP     | HP:0001738 | Exocrine pancreatic insufficiency |                    | FP     |
| HP:0002037 | Inflammation of the large intestine |          | FP     | HP:0002028 | Chronic diarrhea                  | -                  | TP     |
| HP:0002027 | Abdominal pain                      | -        | TP     | HP:0004395 | Malnutrition                      |                    | FP     |
| HP:0001733 | Pancreatitis                        |          | FP     | HP:0100279 | Ulcerative colitis                |                    | FP     |
| HP:0000939 | Osteoporosis                        | -        | TP     | HP:0000820 | Abnormality of the thyroid gland  |                    | FP     |
| HP:0100651 | Type I diabetes mellitus            |          | FP     | HP:0004322 | Short stature                     |                    | FP     |
| HP:0001891 | Iron deficiency anemia              | 17325959 | TP     | HP:0000819 | Diabetes mellitus                 |                    | FP     |
| HP:0000737 | Irritability                        |          | FP     | HP:0006280 | Chronic pancreatitis              |                    | FP     |
| HP:0100646 | Thyroiditis                         |          | FP     | HP:0000938 | Osteopenia                        | 11560797           | TP     |
| HP:0001508 | Failure to thrive                   | -        | TP     | HP:0001984 | Intolerance to protein            |                    | FP     |
| HP:0002583 | Colitis                             |          | FP     | HP:0001510 | Growth delay                      |                    | FP     |
| HP:0001251 | Ataxia                              |          | FP     | HP:0001250 | Seizures                          |                    | FP     |
| HP:0003270 | Abdominal distention                | 18060282 | TP     | HP:0003261 | Increased IgA level               |                    | FP     |
| HP:0002613 | Biliary cirrhosis                   |          | FP     | HP:0001548 | Overgrowth                        |                    | FP     |
| HP:0100827 | Lymphocytosis                       |          | FP     | HP:0002019 | Constipation                      |                    | FP     |
| HP:0002749 | Osteomalacia                        | 22593794 | TP     | HP:0001324 | Muscle weakness                   |                    | FP     |
| HP:0009830 | Peripheral neuropathy               | -        | TP     | HP:0004789 | Lactose intolerance               | 25072743           | TP     |
| HP:0000821 | Hypothyroidism                      |          | FP     | HP:0002514 | Cerebral calcification            | 7558773<br>9822844 | TP     |
| HP:0001370 | Rheumatoid arthritis                |          | FP     | HP:0000789 | Infertility                       | -                  | TP     |
| HP:0004315 | IgG deficiency                      |          | FP     | HP:0002630 | Fat malabsorption                 | 21447770           | TP     |
| HP:0008207 | Primary adrenal insufficiency       |          | FP     | HP:0011107 | Recurrent aphthous stomatitis     | 17919276           | TP     |
| HP:0002725 | Systemic lupus erythematosus        |          | FP     | HP:0002721 | Immunodeficiency                  |                    | FP     |
| HP:0000740 | Anxiety (with pheochromocytoma)     |          | FP     | HP:0005268 | Spontaneous abortion              |                    | FP     |
| HP:0001513 | Obesity                             |          | FP     | HP:0100512 | Vitamin D deficiency              | 23328299           | TP     |
| HP:0000867 | Secondary hyperparathyroidism       | 20387675 | TP     | HP:0001369 | Arthritis                         |                    | FP     |
| HP:0000872 | Hashimoto thyroiditis               |          | FP     | HP:0003881 | Humeral sclerosis                 |                    | FP     |
| HP:0003765 | Psoriasis                           |          | FP     | HP:0100647 | Graves disease                    |                    | FP     |
| HP:0003159 | Hyperoxaluria                       | 835313   | TP     | HP:0003073 | Hypoalbuminemia                   |                    | FP     |
| HP:0002835 | Aspiration                          |          | FP     | HP:0002527 | Falls                             |                    | FP     |
| HP:0100753 | Schizophrenia                       |          | FP     | HP:0000823 | Delayed puberty                   | 8338991            | TP     |
| HP:0005229 | Jejunoleal ulceration               | 16292096 | TP     | HP:0100327 | Cow milk allergy                  |                    | FP     |
| HP:0005505 | Refractory anemia                   | 17704578 | TP     | HP:0002239 | Gastrointestinal hemorrhage       | 8602182            | TP     |
| HP:0005202 | Helicobacter pylori infection       |          | FP     | HP:0004332 | Abnormality of lymphocytes        |                    | FP     |
| HP:0007354 | Amyotrophic lateral sclerosis       |          | FP     | HP:0005681 | Juvenile rheumatoid arthritis     |                    | FP     |
| HP:0004313 | Hypogammaglobulinemia               |          | FP     | HP:0002757 | Recurrent fractures               | 12867795           | TP     |
| HP:0004325 | Decreased body weight               |          | FP     | HP:0000836 | Hyperthyroidism                   |                    | FP     |
| HP:0003198 | Myopathy                            | 15389648 | TP     | HP:0001518 | Small for gestational age         |                    | FP     |
| HP:0000794 | IgA nephropathy                     |          | FP     | HP:0001945 | Fever                             |                    | FP     |

*continued on the next page*

**Table S32. Celiac Disease – continued**

| ID         | Name                               | pmid                 | status | ID         | Name                                 | pmid                            | status |
|------------|------------------------------------|----------------------|--------|------------|--------------------------------------|---------------------------------|--------|
| HP:0002331 | Headache (with pheochromocytoma)   |                      | FP     | HP:0000980 | Pallor                               |                                 | FP     |
| HP:0001047 | Atopic dermatitis                  |                      | FP     | HP:0000975 | Hyperhidrosis                        |                                 | FP     |
| HP:0000853 | Goiter                             |                      | FP     | HP:0004385 | Protracted diarrhea                  | 7714682                         | FN     |
| HP:0005265 | Abnormality of the jejunum         | 6391982              | FN     | HP:0002041 | Intractable diarrhea                 | 24355936                        | FN     |
| HP:0004840 | Hypochromic microcytic anemia      | 8956178              | FN     | HP:0003146 | Hypocholesterolemia                  | 16945614                        | FN     |
| HP:0002750 | Delayed skeletal maturation        | 19201117             | FN     | HP:0007141 | Sensorimotor neuropathy              | 9416814                         | FN     |
| HP:0006297 | Hypoplasia of dental enamel        | 10883318<br>20540401 | FN     | HP:0011892 | Vitamin K deficiency                 | 17768663                        | FN     |
| HP:0002243 | Protein-losing enteropathy         | 619623               | FN     | HP:0000869 | Secondary amenorrhea                 | 11150866                        | FN     |
| HP:0002574 | Episodic abdominal pain            | 4085741              | FN     | HP:0001972 | Macrocytic anemia                    | 20455043                        | FN     |
| HP:0008151 | Prolonged prothrombin time         | 16093880             | FN     | HP:0003075 | Hypoproteinemia                      | 14074696<br>15125378            | FN     |
| HP:0011856 | Pica                               | 2305699              | FN     | HP:0002073 | Progressive cerebellar ataxia        | 19622110                        | FN     |
| HP:0005897 | Severe osteoporosis                | 21611842             | FN     | HP:0003701 | Proximal muscle weakness             | 12439125                        | FN     |
| HP:0002229 | Alopecia areata                    | 12603809             | FN     | HP:0002584 | Intestinal bleeding                  | 12664131                        | FN     |
| HP:0100513 | Vitamin E deficiency               | 16100995             | FN     | HP:0002672 | Gastrointestinal carcinoma           | 19408741                        | FN     |
| HP:0002917 | Hypomagnesemia                     | 16358091             | FN     | HP:0003477 | Peripheral axonal neuropathy         | 16835287                        | FN     |
| HP:0002748 | Rickets                            | 11132463             | FN     | HP:0002580 | Volvulus                             | 9587089                         | FN     |
| HP:0002576 | Intussusception                    | 9464437<br>11003969  | FN     | HP:0004326 | Cachexia                             | 12368936                        | FN     |
| HP:0002900 | Hypokalemia                        | 21525142             | FN     | HP:0003613 | Antiphospholipid antibody positivity | 21839587                        | FN     |
| HP:0002459 | Dysautonomia                       | 16967315             | FN     | HP:0000141 | Amenorrhea                           | 20359791                        | FN     |
| HP:0002901 | Hypocalcemia                       | 7088767<br>22593794  | FN     | HP:0001336 | Myoclonus                            | 3504245<br>16638509<br>22225790 | FN     |
| HP:0003401 | Paresthesia                        | 12771245             | FN     | HP:0011459 | Esophageal carcinoma                 | 8783767                         | FN     |
| HP:0002240 | Hepatomegaly                       | 12685387             | FN     | HP:0002196 | Myelopathy                           | 12151653                        | FN     |
| HP:0003493 | Antinuclear antibody positivity    | 8293004              | FN     | HP:0001271 | Polyneuropathy                       | 15389648                        | FN     |
| HP:0003326 | Myalgia                            | 22138844             | FN     | HP:0002829 | Arthralgia                           | 11907355                        | FN     |
| HP:0001744 | Splenomegaly                       | 23619270<br>16175383 | FN     | HP:0000554 | Uveitis                              | 22408231                        | FN     |
| HP:0000802 | Impotence                          | 20017709             | FN     | HP:0001397 | Hepatic steatosis                    | 23315648                        | FN     |
| HP:0002244 | Abnormality of the small intestine | -                    | FN     | HP:0004349 | Reduced bone mineral density         | -                               | FN     |
| HP:0004386 | Gastrointestinal inflammation      | -                    | FN     | HP:0011458 | Abdominal symptom                    | -                               | FN     |



**Table S33.** Overview of HPO annotations for **Acute Cholecystitis** that were derived by concept recognition in PubMed using BioLark. There were 9 true positives, 4 false positives, and 8 false negatives.

| ID         | Name                          | pmid     | status | ID         | Name                              | pmid     | status |
|------------|-------------------------------|----------|--------|------------|-----------------------------------|----------|--------|
| HP:0001082 | Cholecystitis                 | -        | TP     | HP:0001081 | Cholelithiasis                    | -        | TP     |
| HP:0100758 | Gangrene                      | 23132628 | TP     | HP:0002027 | Abdominal pain                    | 22872303 | TP     |
| HP:0001735 | Acute pancreatitis            |          | FP     | HP:0001945 | Fever                             | 22872303 | TP     |
| HP:0000952 | Jaundice                      | 19691802 | TP     | HP:0002586 | Peritonitis                       | 17252294 | TP     |
| HP:0100806 | Sepsis                        | 17203529 | TP     | HP:0001733 | Pancreatitis                      |          | FP     |
| HP:0001974 | Leukocytosis                  | 23340953 | TP     | HP:0002835 | Aspiration                        |          | FP     |
| HP:0001513 | Obesity                       |          | FP     | HP:0002910 | Elevated hepatic transaminases    | 19275859 | FN     |
| HP:0005609 | Gallbladder dysfunction       | 17252300 | FN     | HP:0005230 | Biliary tract obstruction         | 23271073 | FN     |
| HP:0003155 | Elevated alkaline phosphatase | 21876567 | FN     | HP:0002013 | Vomiting                          | 22153541 | FN     |
| HP:0001396 | Cholestasis                   | 17427067 | FN     | HP:0011227 | Elevated C-reactive protein level | 22872303 | FN     |
| HP:0002018 | Nausea                        | 25239990 | FN     |            |                                   |          |        |

**Table S34.** Overview of HPO annotations for **Duodenogastric Reflux** that were derived by concept recognition in PubMed using BioLark. There were 13 true positives, 8 false positives, and 4 false negatives.

| ID         | Name                       | pmid     | status | ID         | Name                          | pmid     | status |
|------------|----------------------------|----------|--------|------------|-------------------------------|----------|--------|
| HP:0002020 | Gastroesophageal reflux    | 14518219 | TP     | HP:0100633 | Esophagitis                   | 19662586 | TP     |
| HP:0005263 | Gastritis                  | -        | TP     | HP:0002592 | Gastric ulcer                 | 6690637  | TP     |
| HP:0002588 | Duodenal ulcer             | 20458957 | TP     | HP:0100580 | Barrett esophagus             | 19662586 | TP     |
| HP:0002835 | Aspiration                 |          | FP     | HP:0005231 | Chronic gastritis             | 22289498 | TP     |
| HP:0001733 | Pancreatitis               |          | FP     | HP:0004398 | Peptic ulcer                  | 11396533 | TP     |
| HP:0001081 | Cholelithiasis             |          | FP     | HP:0005202 | Helicobacter pylori infection |          | FP     |
| HP:0002582 | Chronic atrophic gastritis | 1397852  | TP     | HP:0002013 | Vomiting                      | 17245178 | TP     |
| HP:0002017 | Nausea and vomiting        | -        | TP     | HP:0011459 | Esophageal carcinoma          | 15102519 | TP     |
| HP:0004791 | Esophageal ulceration      |          | FP     | HP:0001082 | Cholecystitis                 |          | FP     |
| HP:0002860 | Squamous cell carcinoma    |          | FP     | HP:0002027 | Abdominal pain                | 8674397  | TP     |
| HP:0002578 | Gastroparesis              |          | FP     | HP:0006753 | Neoplasm of the stomach       | 12429172 | FN     |
| HP:0003270 | Abdominal distention       | 19099725 | FN     | HP:0100751 | Esophageal neoplasm           | -        | FN     |
| HP:0002018 | Nausea                     | 3863229  | FN     |            |                               |          |        |

**Table S35.** Overview of HPO annotations for **Acute Necrotizing Pancreatitis** that were derived by concept recognition in PubMed using BioLark. There were 19 true positives, 17 false positives, and 21 false negatives.

| ID         | Name                                   | pmid                             | status | ID         | Name                              | pmid                                                     | status |
|------------|----------------------------------------|----------------------------------|--------|------------|-----------------------------------|----------------------------------------------------------|--------|
| HP:0001735 | Acute pancreatitis                     | -                                | TP     | HP:0001733 | Pancreatitis                      |                                                          | FP     |
| HP:0000789 | Infertility                            |                                  | FP     | HP:0005206 | Pancreatic pseudocyst             | 23268585                                                 | TP     |
| HP:0100806 | Sepsis                                 | 12748429                         | TP     | HP:0006280 | Chronic pancreatitis              |                                                          | FP     |
| HP:0002027 | Abdominal pain                         | 11847949                         | TP     | HP:0002586 | Peritonitis                       |                                                          | FP     |
| HP:0001081 | Cholelithiasis                         |                                  | FP     | HP:0100844 | Pancreatic fistula                | 17516324<br>23386143<br>21253397                         | TP     |
| HP:0001541 | Ascites                                | 17516324                         | TP     | HP:0000969 | Edema                             |                                                          | FP     |
| HP:0100027 | Recurrent pancreatitis                 |                                  | FP     | HP:0000718 | Aggressive behavior               |                                                          | FP     |
| HP:0000083 | Renal insufficiency                    | 19262525                         | TP     | HP:0100819 | Intestinal fistula                | 23386143                                                 | TP     |
| HP:0001945 | Fever                                  | 23286256<br>10430383             | TP     | HP:0002098 | Respiratory distress              | 17533079                                                 | TP     |
| HP:0002155 | Hypertriglyceridemia                   |                                  | FP     | HP:0002093 | Respiratory insufficiency         |                                                          | FP     |
| HP:0001919 | Acute renal failure                    | 16282052                         | TP     | HP:0002013 | Vomiting                          | 17219076<br>18716785<br>16106939                         | TP     |
| HP:0002615 | Hypotension                            | 17106218                         | TP     | HP:0002202 | Pleural effusion                  | 17516324                                                 | TP     |
| HP:0000952 | Jaundice                               |                                  | FP     | HP:0001974 | Leukocytosis                      | 18981549                                                 | TP     |
| HP:0002239 | Gastrointestinal hemorrhage            | 16282052                         | TP     | HP:0003270 | Abdominal distention              | 15239271                                                 | TP     |
| HP:0001738 | Exocrine pancreatic insufficiency      |                                  | FP     | HP:0003077 | Hyperlipidemia                    |                                                          | FP     |
| HP:0002090 | Pneumonia                              |                                  | FP     | HP:0004872 | Incisional hernia                 |                                                          | FP     |
| HP:0000819 | Diabetes mellitus                      | -                                | TP     | HP:0001873 | Thrombocytopenia                  |                                                          | FP     |
| HP:0001899 | Increased hematocrit                   | 12123089<br>18596637             | TP     | HP:0002625 | Deep venous thrombosis            |                                                          | FP     |
| HP:0002574 | Episodic abdominal pain                | 19822503                         | FN     | HP:0010444 | Pulmonary insufficiency           | 20461065                                                 | FN     |
| HP:0003073 | Hypoalbuminemia                        | 16282052                         | FN     | HP:0011106 | Hypovolemia                       | 17163376                                                 | FN     |
| HP:0002595 | Ileus                                  | 16768334<br>19822503             | FN     | HP:0002901 | Hypocalcemia                      | 12608652<br>19696761<br>15007192<br>22049070<br>18405600 | FN     |
| HP:0005521 | Disseminated intravascular coagulation | 15998382<br>12001677<br>15782108 | FN     | HP:0002910 | Elevated hepatic transaminases    | 22825263<br>19800984<br>9882816                          | FN     |
| HP:0100598 | Pulmonary edema                        | 1101836                          | FN     | HP:0001399 | Hepatic failure                   | 17444596                                                 | FN     |
| HP:0003074 | Hyperglycemia                          | 15627657                         | FN     | HP:0001298 | Encephalopathy                    | 18334145<br>18405600                                     | FN     |
| HP:0001824 | Weight loss                            | 19696761                         | FN     | HP:0100592 | Peritoneal abscess                | 11036297                                                 | FN     |
| HP:0002570 | Steatorrhea                            | 16895491<br>14707732             | FN     | HP:0003075 | Hypoproteinemia                   | 20517265                                                 | FN     |
| HP:0003418 | Back pain                              | 15911961                         | FN     | HP:0002590 | Paralytic ileus                   | 18759203                                                 | FN     |
| HP:0006846 | Acute encephalopathy                   | 17879709                         | FN     | HP:0011227 | Elevated C-reactive protein level | 16145344                                                 | FN     |
| HP:0100732 | Pancreatic fibrosis                    | 9445116                          | FN     |            |                                   |                                                          |        |

**Table S36.** Overview of HPO annotations for **Epididymitis** that were derived by concept recognition in PubMed using BioLark. There were 9 true positives, 20 false positives, and 2 false negatives.

| ID         | Name                          | pmid              | status | ID         | Name                               | pmid     | status |
|------------|-------------------------------|-------------------|--------|------------|------------------------------------|----------|--------|
| HP:0000031 | Epididymitis                  | 22787516          | TP     | HP:0100796 | Orchitis                           |          | FP     |
| HP:0100813 | Testicular torsion            |                   | FP     | HP:0000024 | Prostatitis                        |          | FP     |
| HP:0000789 | Infertility                   |                   | FP     | HP:0000010 | Recurrent urinary tract infections |          | FP     |
| HP:0001945 | Fever                         | 16294792          | TP     | HP:0000029 | Testicular atrophy                 | 3534264  | TP     |
| HP:0003251 | Male infertility              | 23482360          | TP     | HP:0010788 | Testicular neoplasm                |          | FP     |
| HP:0002835 | Aspiration                    |                   | FP     | HP:0000969 | Edema                              |          | FP     |
| HP:0011962 | Obstructive azoospermia       | 15064321          | TP     | HP:0002633 | Vasculitis                         |          | FP     |
| HP:0100790 | Hernia                        |                   | FP     | HP:0000027 | Azoospermia                        | 2120839  | TP     |
| HP:0000798 | Oligospermia                  | 9542967           | TP     | HP:0000028 | Cryptorchidism                     |          | FP     |
| HP:0002960 | Autoimmunity                  |                   | FP     | HP:0100518 | Dysuria                            | 22787516 | TP     |
| HP:0000979 | Purpura                       |                   | FP     | HP:0010783 | Erythema                           | 3788880  | TP     |
| HP:0002721 | Immunodeficiency              |                   | FP     | HP:0100806 | Sepsis                             |          | FP     |
| HP:0002719 | Recurrent infections          |                   | FP     | HP:0200023 | Priapism                           |          | FP     |
| HP:0008222 | Female infertility            |                   | FP     | HP:0000796 | Urethral obstruction               |          | FP     |
| HP:0000041 | Chordee                       |                   | FP     | HP:0001974 | Leukocytosis                       | 18329081 | FN     |
| HP:0009714 | Abnormality of the epididymis | 618030<br>8520650 | FN     |            |                                    |          |        |

**Table S37.** Overview of HPO annotations for **Spermatic Cord Torsion** that were derived by concept recognition in PubMed using BioLark. There were 5 true positives, 15 false positives, and 8 false negatives.

| ID         | Name                      | pmid     | status | ID         | Name                       | pmid                 | status |
|------------|---------------------------|----------|--------|------------|----------------------------|----------------------|--------|
| HP:0100813 | Testicular torsion        | 4087084  | TP     | HP:0000031 | Epididymitis               |                      | FP     |
| HP:0100796 | Orchitis                  |          | FP     | HP:0000028 | Cryptorchidism             |                      | FP     |
| HP:0000029 | Testicular atrophy        | 4087084  | TP     | HP:0000789 | Infertility                |                      | FP     |
| HP:0000969 | Edema                     |          | FP     | HP:0100790 | Hernia                     |                      | FP     |
| HP:0000023 | Inguinal hernia           |          | FP     | HP:0100758 | Gangrene                   | 5007848              | TP     |
| HP:0003251 | Male infertility          | 3090760  | TP     | HP:0002027 | Abdominal pain             | 11019377<br>21903353 | TP     |
| HP:0010788 | Testicular neoplasm       |          | FP     | HP:0010470 | Supernumerary testes       |                      | FP     |
| HP:0002017 | Nausea and vomiting       |          | FP     | HP:0000979 | Purpura                    |                      | FP     |
| HP:0000035 | Abnormality of the testis |          | FP     | HP:0008733 | Dysplastic testes          |                      | FP     |
| HP:0000053 | Macroorchidism            |          | FP     | HP:0008720 | Primary testicular failure |                      | FP     |
| HP:0000798 | Oligospermia              | 3090760  | FN     | HP:0008669 | Impaired spermatogenesis   | 3090760              | FN     |
| HP:0000802 | Impotence                 | 16138584 | FN     | HP:0010783 | Erythema                   | 10999695             | FN     |
| HP:0002013 | Vomiting                  | 21490540 | FN     | HP:0001945 | Fever                      | 11019377<br>21903353 | FN     |
| HP:0008734 | Decreased testicular size | 6776291  | FN     | HP:0000027 | Azoospermia                | 16138584             | FN     |

**Table S38.** Overview of HPO annotations for **Uterine Inversion** that were derived by concept recognition in PubMed using BioLark. There were 2 true positives, 7 false positives, and 4 false negatives.

| ID         | Name                       | pmid     | status | ID         | Name                   | pmid     | status |
|------------|----------------------------|----------|--------|------------|------------------------|----------|--------|
| HP:0100242 | Sarcoma                    |          | FP     | HP:0100718 | Uterine rupture        |          | FP     |
| HP:0000139 | Uterine prolapse           | 2647797  | TP     | HP:0000016 | Urinary retention      |          | FP     |
| HP:0002027 | Abdominal pain             | 17197359 | TP     | HP:0100519 | Anuria                 |          | FP     |
| HP:0006743 | Embryonal rhabdomyosarcoma |          | FP     | HP:0000718 | Aggressive behavior    |          | FP     |
| HP:0000131 | Uterine leiomyoma          |          | FP     | HP:0011891 | Post-partum hemorrhage | 12464994 | FN     |
| HP:0011106 | Hypovolemia                | 15228824 | FN     | HP:0100608 | Metrorrhagia           | 11848030 | FN     |
| HP:0001892 | Abnormal bleeding          | 17578377 | FN     |            |                        |          |        |

**Table S39.** Overview of HPO annotations for **Nephrogenic Diabetes Insipidus** that were derived by concept recognition in PubMed using BioLark. There were 11 true positives, 12 false positives, and 10 false negatives.

| ID         | Name                           | pmid                 | status | ID         | Name                          | pmid                 | status |
|------------|--------------------------------|----------------------|--------|------------|-------------------------------|----------------------|--------|
| HP:0009806 | Nephrogenic diabetes insipidus | -                    | TP     | HP:0000103 | Polyuria                      | 22503803             | TP     |
| HP:0001959 | Polydipsia                     | 22503803             | TP     | HP:0001944 | Dehydration                   | 9831428              | TP     |
| HP:0003228 | Hypernatremia                  | 18715941             | TP     | HP:0000863 | Central diabetes insipidus    |                      | FP     |
| HP:0007302 | Bipolar affective disorder     |                      | FP     | HP:0000873 | Diabetes insipidus            |                      | FP     |
| HP:0003158 | Hypothenuria                   | 16580609             | TP     | HP:0001508 | Failure to thrive             | 16240160<br>15249704 | TP     |
| HP:0002900 | Hypokalemia                    | 12503936             | TP     | HP:0000126 | Hydronephrosis                | 10332005             | TP     |
| HP:0000083 | Renal insufficiency            |                      | FP     | HP:0002902 | Hyponatremia                  |                      | FP     |
| HP:0001249 | Intellectual disability        | 16580609             | TP     | HP:0001947 | Renal tubular acidosis        |                      | FP     |
| HP:0001510 | Growth delay                   | 18584216             | TP     | HP:0010677 | Enuresis nocturna             |                      | FP     |
| HP:0003072 | Hypercalcemia                  |                      | FP     | HP:0008341 | Distal renal tubular acidosis |                      | FP     |
| HP:0001942 | Metabolic acidosis             |                      | FP     | HP:0001276 | Hypertonia                    |                      | FP     |
| HP:0011037 | Decreased urine output         |                      | FP     | HP:0001263 | Global developmental delay    | 15985744             | FN     |
| HP:0003774 | End stage renal disease        | 18519085             | FN     | HP:0001945 | Fever                         | 10332005             | FN     |
| HP:0001250 | Seizures                       | 10332005             | FN     | HP:0002013 | Vomiting                      | 19703807<br>16240160 | FN     |
| HP:0000072 | Hydroureter                    | 10332005             | FN     | HP:0002514 | Cerebral calcification        | 10332005             | FN     |
| HP:0000017 | Nocturia                       | 15249704<br>12784095 | FN     | HP:0001986 | Hypertonic dehydration        | 10332005             | FN     |
| HP:0011106 | Hypovolemia                    | 18715941             | FN     |            |                               |                      |        |

**Table S40.** Overview of HPO annotations for **Focal Segmental Glomerulosclerosis.tab** that were derived by concept recognition in PubMed using BioLark. There were 13 true positives, 51 false positives, and 4 false negatives.

| ID         | Name                                            | pmid               | status | ID         | Name                                | pmid                          | status |
|------------|-------------------------------------------------|--------------------|--------|------------|-------------------------------------|-------------------------------|--------|
| HP:0000097 | Focal segmental glomerulosclerosis              | -                  | TP     | HP:0000093 | Proteinuria                         | 11863085                      | TP     |
| HP:0000100 | Nephrotic syndrome                              |                    | FP     | HP:0000096 | Glomerulosclerosis                  |                               | FP     |
| HP:0000112 | Nephropathy                                     |                    | FP     | HP:0003774 | End stage renal disease             | 12817066                      | TP     |
| HP:0003881 | Humeral sclerosis                               |                    | FP     | HP:0000099 | Glomerulonephritis                  |                               | FP     |
| HP:0000822 | Hypertension                                    |                    | FP     | HP:0100820 | Glomerulopathy                      | -                             | TP     |
| HP:0000083 | Renal insufficiency                             | 11863085           | TP     | HP:0000794 | IgA nephropathy                     |                               | FP     |
| HP:0000793 | Membranoproliferative glomerulonephritis        |                    | FP     | HP:0000123 | Nephritis                           |                               | FP     |
| HP:0000092 | Tubular atrophy                                 |                    | FP     | HP:0005576 | Tubulointerstitial fibrosis         |                               | FP     |
| HP:0001967 | Diffuse mesangial sclerosis                     |                    | FP     | HP:0000790 | Hematuria                           |                               | FP     |
| HP:0003259 | Increased creatinine                            | 8706354            | TP     | HP:0100699 | Scarring                            |                               | FP     |
| HP:0004737 | global glomerulosclerosis                       | -                  | TP     | HP:0002721 | Immunodeficiency                    |                               | FP     |
| HP:0003077 | Hyperlipidemia                                  |                    | FP     | HP:0009741 | Nephrosclerosis                     |                               | FP     |
| HP:0001513 | Obesity                                         |                    | FP     | HP:0003124 | Hypercholesterolemia                |                               | FP     |
| HP:0002907 | Microhematuria                                  | 11863085           | TP     | HP:0000969 | Edema                               |                               | FP     |
| HP:0003073 | Hypoalbuminemia                                 |                    | FP     | HP:0008653 | Necrotizing glomerulonephritis      |                               | FP     |
| HP:0002667 | Nephroblastoma (Wilms tumor)                    |                    | FP     | HP:0003453 | Antineutrophil antibody positivity  |                               | FP     |
| HP:0004722 | Thickening of the glomerular basement membrane  | 7301001            | TP     | HP:0002725 | Systemic lupus erythematosus        |                               | FP     |
| HP:0002633 | Vasculitis                                      |                    | FP     | HP:0000718 | Aggressive behavior                 |                               | FP     |
| HP:0000819 | Diabetes mellitus                               |                    | FP     | HP:0011034 | Amyloidosis                         |                               | FP     |
| HP:0000859 | Hyperaldosteronism                              |                    | FP     | HP:0002621 | Atherosclerosis                     |                               | FP     |
| HP:0002586 | Peritonitis                                     |                    | FP     | HP:0007354 | Amyotrophic lateral sclerosis       |                               | FP     |
| HP:0002955 | Granulomatosis                                  |                    | FP     | HP:0000979 | Purpura                             |                               | FP     |
| HP:0002157 | Azotemia                                        | -                  | TP     | HP:0002155 | Hypertriglyceridemia                |                               | FP     |
| HP:0000037 | Male pseudohermaphroditism                      |                    | FP     | HP:0007430 | Generalized edema                   | 17044480<br>20199191          | TP     |
| HP:0100608 | Metrorrhagia                                    |                    | FP     | HP:0003128 | Lactic acidosis                     |                               | FP     |
| HP:0003613 | Antiphospholipid antibody positivity            |                    | FP     | HP:0003493 | Antinuclear antibody positivity     |                               | FP     |
| HP:0100778 | Cryoglobulinemia                                |                    | FP     | HP:0001917 | Renal amyloidosis                   |                               | FP     |
| HP:0001945 | Fever                                           |                    | FP     | HP:0003076 | Glycosuria                          |                               | FP     |
| HP:0000855 | Insulin resistance                              |                    | FP     | HP:0000028 | Cryptorchidism                      |                               | FP     |
| HP:0003075 | Hypoproteinemia                                 | 18789122           | TP     | HP:0003126 | Low-molecular-weight proteinuria    |                               | FP     |
| HP:0003138 | Increased blood urea nitrogen (BUN)             | -                  | TP     | HP:0010741 | Edema of the lower limbs            |                               | FP     |
| HP:0008723 | Gonadal dysgenesis with female appearance, male |                    | FP     | HP:0003206 | Decreased activity of NADPH oxidase |                               | FP     |
| HP:0001966 | Mesangial abnormality                           | 9064487            | FN     | HP:0004421 | Elevated systolic blood pressure    | -                             | FN     |
| HP:0100520 | Oliguria                                        | 3987100<br>9532830 | FN     | HP:0010980 | Hyperlipoproteinemia                | 8147062<br>9163848<br>3292816 | FN     |



**Table S41.** Overview of HPO annotations for **Renal Artery Obstruction** that were derived by concept recognition in PubMed using BioLark. There were 13 true positives, 47 false positives, and 9 false negatives.

| ID         | Name                                | pmid                | status | ID         | Name                             | pmid     | status |
|------------|-------------------------------------|---------------------|--------|------------|----------------------------------|----------|--------|
| HP:0001920 | Renal artery stenosis               | -                   | TP     | HP:0100817 | Renovascular hypertension        | -        | TP     |
| HP:0000822 | Hypertension                        | -                   | TP     | HP:0000083 | Renal insufficiency              |          | FP     |
| HP:0002621 | Atherosclerosis                     |                     | FP     | HP:0004420 | Arterial thrombosis              |          | FP     |
| HP:0002617 | Aneurysm                            |                     | FP     | HP:0001919 | Acute renal failure              | 4006581  | TP     |
| HP:0000112 | Nephropathy                         |                     | FP     | HP:0100545 | Arterial stenosis                |          | FP     |
| HP:0003774 | End stage renal disease             | 12823672            | TP     | HP:0003259 | Increased creatinine             | 9527401  | TP     |
| HP:0004953 | Abdominal aortic aneurysm           |                     | FP     | HP:0000859 | Hyperaldosteronism               | 19917331 | TP     |
| HP:0004950 | Peripheral arterial disease         |                     | FP     | HP:0001635 | Congestive heart failure         |          | FP     |
| HP:0005313 | Arterial fibromuscular dysplasia    |                     | FP     | HP:0005294 | Arterial dissection              |          | FP     |
| HP:0100519 | Anuria                              | 1259486             | TP     | HP:0001677 | Coronary artery disease          |          | FP     |
| HP:0000093 | Proteinuria                         | 20665031            | TP     | HP:0004942 | Aortic aneurysm                  |          | FP     |
| HP:0100598 | Pulmonary edema                     |                     | FP     | HP:0002527 | Falls                            |          | FP     |
| HP:0005315 | Occlusive arterial disease          |                     | FP     | HP:0000089 | Renal hypoplasia                 |          | FP     |
| HP:0000848 | Increased circulating renin level   | 951017              | TP     | HP:0001067 | Neurofibromas                    |          | FP     |
| HP:0002157 | Azotemia                            | 19671391<br>8720081 | TP     | HP:0008682 | Acute tubular necrosis           |          | FP     |
| HP:0001658 | Myocardial infarction               |                     | FP     | HP:0001650 | Aortic valve stenosis            |          | FP     |
| HP:0000718 | Aggressive behavior                 |                     | FP     | HP:0001297 | Stroke                           |          | FP     |
| HP:0000819 | Diabetes mellitus                   |                     | FP     | HP:0002615 | Hypotension                      |          | FP     |
| HP:0000110 | Renal dysplasia                     |                     | FP     | HP:0001680 | Coarctation of aorta             |          | FP     |
| HP:0004974 | Coarctation of abdominal aorta      |                     | FP     | HP:0002666 | Pheochromocytoma                 |          | FP     |
| HP:0004713 | Reversible renal failure            | 9527401             | TP     | HP:0004947 | Arteriovenous fistula            |          | FP     |
| HP:0000790 | Hematuria                           |                     | FP     | HP:0009741 | Nephrosclerosis                  | 8720083  | TP     |
| HP:0000099 | Glomerulonephritis                  |                     | FP     | HP:0005145 | Coronary artery stenosis         |          | FP     |
| HP:0002647 | Aortic dissection                   |                     | FP     | HP:0002092 | Pulmonary hypertension           |          | FP     |
| HP:0000969 | Edema                               |                     | FP     | HP:0001907 | Thromboembolism                  |          | FP     |
| HP:0000126 | Hydronephrosis                      |                     | FP     | HP:0006000 | Ureteral obstruction             |          | FP     |
| HP:0000077 | Abnormality of the kidney           |                     | FP     | HP:0009726 | Renal neoplasm                   |          | FP     |
| HP:0004936 | Venous thrombosis                   |                     | FP     | HP:0001681 | Angina pectoris                  |          | FP     |
| HP:0004929 | Coronary atherosclerosis            |                     | FP     | HP:0002641 | Peripheral thrombosis            |          | FP     |
| HP:0100860 | Inferior mesenteric artery aneurysm |                     | FP     | HP:0002204 | Pulmonary embolism               |          | FP     |
| HP:0011741 | Secondary hyperaldosteronism        | 6397520             | FN     | HP:0004421 | Elevated systolic blood pressure | 9507221  | FN     |
| HP:0001095 | Hypertensive retinopathy            | 17051904            | FN     | HP:0100735 | Hypertensive crisis              | 7603800  | FN     |
| HP:0000092 | Tubular atrophy                     | 8684534             | FN     | HP:0100520 | Oliguria                         | 12141408 | FN     |
| HP:0002900 | Hypokalemia                         | 19365633            | FN     | HP:0002902 | Hyponatremia                     | 15503172 | FN     |
| HP:0001578 | Hypercortisolism                    | 3725709             | FN     |            |                                  |          |        |

## References

- [1] Lynn Marie Schriml, Cesar Arze, Suvarna Nadendla, Yu-Wei Wayne Chang, Mark Mazaitis, Victor Felix, Gang Feng, and Warren Alden Kibbe. Disease Ontology: a backbone for disease semantic integration. *Nucleic Acids Res*, 40(Database issue):D940–D946, Jan 2012.
