# Supplementary material for: The Human Phenotype Ontology: Semantic Unification of Common and Rare Disease
Source: PubMed Central journal article supplement (PMC4572507; doi:10.1016/j.ajhg.2015.05.020), 2015-07-02
Supplement: mmc2.pdf [file mmc2.pdf]

# The Human Phenotype Ontology: Semantic Unification of Common and Rare Disease

Tudor Groza,<sup>1,2,25</sup> Sebastian Köhler,<sup>3,25</sup> Dawid Moldenhauer,<sup>3,4</sup> Nicole Vasilevsky,<sup>5</sup> Gareth Baynam,<sup>6,7,8,9,10</sup> Tomasz Zemojtel,<sup>3,11</sup> Lynn Marie Schriml,<sup>12,13</sup> Warren Alden Kibbe,<sup>14</sup> Paul N. Schofield,<sup>15,16</sup> Tim Beck,<sup>17</sup> Drashti Vasant,<sup>18</sup> Anthony J. Brookes,<sup>17</sup> Andreas Zankl,<sup>2,19,20</sup> Nicole L. Washington,<sup>21</sup> Christopher J. Mungall,<sup>21</sup> Suzanna E. Lewis,<sup>21</sup> Melissa A. Haendel,<sup>5</sup> Helen Parkinson,<sup>18</sup> and Peter N. Robinson<sup>3,22,23,24,\*</sup>

The Human Phenotype Ontology (HPO) is widely used in the rare disease community for differential diagnostics, phenotype-driven analysis of next-generation sequence-variation data, and translational research, but a comparable resource has not been available for common disease. Here, we have developed a concept-recognition procedure that analyzes the frequencies of HPO disease annotations as identified in over five million PubMed abstracts by employing an iterative procedure to optimize precision and recall of the identified terms. We derived disease models for 3,145 common human diseases comprising a total of 132,006 HPO annotations. The HPO now comprises over 250,000 phenotypic annotations for over 10,000 rare and common diseases and can be used for examining the phenotypic overlap among common diseases that share risk alleles, as well as between Mendelian diseases and common diseases linked by genomic location. The annotations, as well as the HPO itself, are freely available.

## Introduction

The Human Phenotype Ontology (HPO) provides a structured, comprehensive, and well-defined set of over 11,000 classes (terms) that describe phenotypic abnormalities seen in human disease.<sup>1,2</sup> The HPO has been used for developing algorithms and computational tools for clinical differential diagnostics,<sup>3–5</sup> for the prioritization of candidate disease-associated genes,<sup>6–11</sup> in exome sequencing studies,<sup>6–10</sup> and for diagnostics in clinical exome sequencing.<sup>11</sup> In addition, the HPO has been used for translational research, including inferring novel drug indications,<sup>12</sup> characterizing the proteome of the human postsynaptic density,<sup>13</sup> analyzing Neandertal exomes,<sup>14</sup> and other topics.<sup>15–22</sup>

The HPO project provides not only a standard phenotype terminology but also a collection of disease-phenotype annotations, i.e., computational assertions that a disease is associated with a given phenotypic abnormality.

The HPO currently provides over 116,000 annotations to over 7,000 rare diseases; for instance, the disease Marfan syndrome (MIM: 154700) is annotated with the HPO terms “arachnodactyly” (HP: 0001166), “ectopia lentis” (HP: 0001083), and 46 others. The patterns and specificity of the annotations allow the information content (IC) of each term to be calculated; the IC reflects the clinical specificity of the term and represents a key component of most of the aforementioned algorithms.<sup>23</sup> Additionally, computational logical definitions are provided for HPO terms. For instance, the HPO term “hypoglycemia” is defined on the basis of “decreased concentration” (PATO: 0001163) in “blood” (UBERON: 0000178) with respect to “glucose” (CHEBI: 17234); this definition uses terms from the ontologies PATO<sup>24</sup> for describing qualities, UBERON for describing anatomy,<sup>25,26</sup> and ChEBI for describing small biological molecules.<sup>27</sup> These definitions are useful for a number of applications, including cross-species phenotype comparisons<sup>6,28,29</sup> and computational quality control.<sup>30</sup>

<sup>1</sup>School of Information Technology and Electrical Engineering, University of Queensland, St. Lucia, QLD 4072, Australia; <sup>2</sup>Garvan Institute of Medical Research, Darlinghurst, Sydney, NSW 2010, Australia; <sup>3</sup>Institute for Medical and Human Genetics, Charité-Universitätsmedizin Berlin, Augustenburger Platz 1, 13353 Berlin, Germany; <sup>4</sup>University of Applied Sciences, Wiesenstrasse 14, 35390 Giessen, Germany; <sup>5</sup>Library, Oregon Health & Science University, Portland, OR 97239, USA; <sup>6</sup>School of Paediatrics and Child Health, University of Western Australia, Perth, WA 6840, Australia; <sup>7</sup>Institute for Immunology and Infectious Diseases, Murdoch University, Perth, WA 6150, Australia; <sup>8</sup>Office of Population Health Genomics, Public Health and Clinical Services Division, Department of Health, Perth, WA 6004, Australia; <sup>9</sup>Genetic Services of Western Australia, King Edward Memorial Hospital, Perth, WA 6008, Australia; <sup>10</sup>Telethon Kids Institute, Perth, WA 6008, Australia; <sup>11</sup>Institute of Bioorganic Chemistry, Polish Academy of Sciences, 61-704 Poznań, Poland; <sup>12</sup>Department of Epidemiology and Public Health, School of Medicine, University of Maryland, Baltimore, MD 21201, USA; <sup>13</sup>Institute for Genome Sciences, School of Medicine, University of Maryland, Baltimore, MD 21201, USA; <sup>14</sup>Center for Biomedical Informatics and Information Technology, National Cancer Institute, 9609 Medical Center Drive, Rockville, MD 20850, USA; <sup>15</sup>Department of Physiology, Development and Neuroscience, University of Cambridge, Downing Street, Cambridge CB2 3EG, UK; <sup>16</sup>The Jackson Laboratory, Bar Harbor, ME 04609, USA; <sup>17</sup>Department of Genetics, University of Leicester, Leicester LE1 7RH, UK; <sup>18</sup>European Bioinformatics Institute, European Molecular Biology Laboratory, Wellcome Trust Genome Campus, Hinxton, Cambridge CB10 1SD UK; <sup>19</sup>Academic Department of Medical Genetics, The Children’s Hospital at Westmead, Sydney, NSW 2145, Australia; <sup>20</sup>Discipline of Genetic Medicine, Sydney Medical School, University of Sydney, Sydney, NSW 2145, Australia; <sup>21</sup>Genomics Division, Lawrence Berkeley National Laboratory, 1 Cyclotron Road, Berkeley, CA 94720, USA; <sup>22</sup>Max Planck Institute for Molecular Genetics, Ihnestrasse 63–73, 14195 Berlin, Germany; <sup>23</sup>Berlin Brandenburg Center for Regenerative Therapies, Charité-Universitätsmedizin Berlin, Augustenburger Platz 1, 13353 Berlin, Germany; <sup>24</sup>Institute of Bioinformatics, Department of Mathematics and Computer Science, Freie Universität Berlin, Takustrasse 9, 14195 Berlin, Germany

<sup>25</sup>These authors contributed equally to this work

\*Correspondence: [peter.robinson@charite.de](mailto:peter.robinson@charite.de)

<http://dx.doi.org/10.1016/j.ajhg.2015.05.020>. ©2015 The Authors

This is an open access article under the CC BY license (<http://creativecommons.org/licenses/by/4.0/>).

The focus of the HPO has, to date, been on rare disease, and correspondingly, it has primarily been adopted by groups from various fields in human genetics, including the Sanger Institute's Deciphering Developmental Disorders database<sup>22</sup> and DECIPHER,<sup>31</sup> the European Cytogeneticists Association Register of Unbalanced Chromosome Aberrations,<sup>32</sup> the NIH Undiagnosed Diseases Program and Network, the rare-disease section of the UK's 100,000 Genomes Project, and Genome Canada's CARE for RARE program, but also by databases for genome-wide association studies (GWAS).<sup>33–35</sup> Along with rapid technological advances in the field of next-generation sequencing (NGS), personalized medicine is quickly becoming reality,<sup>36</sup> and initial attempts to use genome sequencing to predict phenotypic abnormalities in common, complex diseases are beginning to show promising results.<sup>37</sup> In this work, we have extended the range of the HPO from rare to common human disease in order to provide a computational foundation for phenotype-driven analysis of genomes and other translational research in the field of genetics of complex human disease. We have generated over 132,000 phenotypic annotations from the HPO for 3,145 common diseases by using a text-mining approach and have made them freely available to the community. Finally, we demonstrate the uses to which this resource can be put and set out a framework for the future development of the HPO as a community-driven resource for phenotypic analysis of rare and common disease.

## Material and Methods

### Extraction of HPO Terms By Automatic Concept Recognition

Concept recognition (CR) extracts ontology terms from text with the aim of leveraging structured knowledge from unstructured data. For example, CR might be able to identify the term “macrocephaly” (HP: 0000256) within an abstract that contains the phrase “large head” because the latter is listed as a synonym in the entry HP: 0000256. Published CR approaches rely on direct dictionary lookup combined with stemming and word-permutation algorithms<sup>38</sup> or use natural-language-processing pipelines with techniques such as sentence splitting, tokenization, and part-of-speech tagging.<sup>39</sup> In our experiments we used a CR tool specifically tailored to address the challenges of extracting phenotype concepts—the Bio-LarK Concept Recognizer.<sup>40</sup> Bio-LarK uses a two-step approach to index and retrieve ontology terms in combination with a series of language techniques to enable term normalization. In addition to providing standard CR, the system is able to decompose and align conjunctive terms (e.g., “short and broad fingers” aligns to “short finger” [HP: 0009381] and “broad finger” [HP: 0001500]), as well as recognize and process non-canonical phenotypes, such as “fingers are short and broad,” which would be aligned to the same terms as in the previous example. Our current CR approach does not attempt to detect negation, which might represent a cause of false-positive results. However, because of the post-processing steps used to generate the final annotations on the basis of threshold values for annotation frequency and IC (see below), our procedure will not, in general, be sensitive to isolated negative assertions.

### PubMed-MEDLINE 2014 Corpus

The CR process was performed on the 2014 release of the PubMed-MEDLINE corpus. The corpus contains 22,376,811 articles, of which 13,262,617 have a valid title and abstract (most of the missing entries represent articles in languages other than English and only their titles are listed). MEDLINE abstracts are associated with a series of medical subject headings (MeSHs); the main headings (descriptors) provide a schematic description of the topic of the article. The descriptors are divided into 16 categories, including category C, “diseases.” Category C contains 4,620 unique entries, and we refer to it here as “MeSH diseases.”

We note that although MeSH category C is described as comprising diseases, many of the terms in the complete tree C (4,620 entries) do not refer to specific diseases. For instance, many of the terms describe general categories, such as “brain diseases” (MeSH: D001927), veterinary diseases (e.g., “brucellosis, bovine” [MeSH: D002007]), and various other entities, such as “cadaver” (MeSH: D002102). Others represent phenotypic features of diseases rather than actual disease entities; one example is “Cheyne-Stokes respiration” (MeSH: D002639), which is an abnormal breathing pattern that can be observed in diseases such as central sleep apnea syndrome. We excluded such MeSH entries by careful manual curation, leaving a total of 3,145 MeSH category C descriptors that we judged to actually represent specific disease entries. Only these entries were used for the analysis described in this manuscript.

We filtered the 13,262,617 abstracts on the basis of the MeSH terms to retain only those abstracts that included at least one of the 3,145 disease entries from the MeSH disease list and then processed them with the Bio-LarK Concept Recognizer. In some cases, a single abstract was annotated with multiple MeSH disease terms, some of which were also featured as major topics for the article under scrutiny. For the purpose of this analysis, we included all abstracts independently of the number of associated MeSH terms or their major topic feature.

### Filtering HPO Annotations

Many abstracts that describe a given disease also mention a certain HPO term. Consequently, that disease is more likely to be characterized by the corresponding phenotypic abnormality. For instance, the PubMed abstract with the PubMed identifier PMID: 23886833 is indexed with the MeSH term “encephalitis, herpes simplex,” and parsing the record with Bio-LarK reveals a number of HPO terms, including “headache” (HP: 0002315). Therefore, one might be tempted to conclude that this type of encephalitis can be characterized by headaches, but from this single observation it cannot be guaranteed that the abstract is indeed making this assertion. The abstract could, for instance, be describing an adverse effect of a medication, a differential diagnosis, or one of a number of other things. We reasoned that if an HPO term were identified in multiple abstracts associated with a given disease from the MeSH disease list, then it would be more likely to represent a genuine phenotypic abnormality associated with the disease.

However, frequency alone is not a strong enough indicator of a correct association between a phenotype and a disease. Ideally, the phenotype should also be specific to (i.e., present only in a limited number of) certain diseases. Given this required balance, we developed a procedure that aims to distinguish the true annotations on the basis of three metrics: (1) the balance between frequency and specificity; (2) the IC of the term—i.e., the overall degree of

**Input:**  $S_{HPO}$  – Initial set of HPO terms associated with a disease (resulting from the concept recognition process)  
**Output:**  $FinalSet$  – ranked and clustered HPO terms  
**Parameters:**  $n, m, e$

- 1 Rank  $t \in S_{HPO}$  using  $TFIDF(t, D)$
- 2  $Seeds_{HPO} \leftarrow \{t \mid TFIDF(t, D) \geq \text{Mean}_{TFIDF} + n \times \text{SD}_{TFIDF}\}$
- 3  $Rest_{HPO} \leftarrow S_{HPO} - Seeds_{HPO}$
- 4 Group terms in according to their associated top-level HPO ancestor  $A$  – i.e., the most generic type of abnormality
- 5 **foreach**  $A \in \text{Toplevel}_{HPO}$  **do**
- 6   find  $O_A = \{t_1, t_2, \dots, t_k\}, O_A \neq \emptyset, t \in Seeds_{HPO}, A \in \text{Ancestor}(t)$ , such that  $O_A$  is the subset that minimizes  $\text{density}(A)$   
      //  $\text{density}(A) = \text{SD} \left[ \text{Path}_{i=1, j=1, i \neq j}^n(t_i, t_j) \right]$
- 7   retain  $\min(\text{density}(A))$
- end**
- 8  $FinalSet = \{O_A, O_A \neq \emptyset \mid A \in \text{Toplevel}_{HPO}\}$
- 9 Rank  $t \in Rest_{HPO}$  using  $TFIDF^{IC}(t, D)$
- 10  $Candidates_{HPO} \leftarrow \{t \mid TFIDF^{IC}(t, D) \geq \text{Mean}_{TFIDF^{IC}} + m \times \text{SD}_{TFIDF^{IC}}\}$
- 11 Group terms in  $Candidates_{HPO}$  according to their associated top-level HPO ancestor  $A$
- 12 **foreach**  $A \in \text{Toplevel}_{HPO}$  **do**
- 13   **foreach**  $t \in Candidates_{HPO}$  such that  $A \in \text{Ancestor}(t)$  **do**
- 14      $O_A^t \leftarrow O_A + \{t\}$
- 15     **if**  $\min(\text{density}(O_A^t)) \leq \min(\text{density}(O_A)) + e$  **then**  
        $FinalSet \leftarrow FinalSet + \{t\}$
- end**
- end**
- end**
- 16 Remove duplicates from  $FinalSet$
- 17 **Return:**  $FinalSet$

specificity of the term in our corpus of diseases; and (3) the disease-category-driven density of a subset of terms, based on the shortest path between them in the HPO. The balance between frequency and specificity is measured with a standard information-retrieval technique: term frequency, inverse document frequency (TFIDF). The TFIDF weighs HPO terms highly if they occur with high frequency among abstracts annotated to a disease but down-weights terms that are common within the entire corpus (see the following section).

Figure 1 summarizes the algorithm we have developed. It takes as input the initial set of HPO terms and, using three tuning parameters, produces a final set of candidates. The three tuning parameters control term cutoffs at different stages: (1)  $n$ , which defines the initial TFIDF threshold used for creating the clustering seeds; (2)  $m$ , which defines a second specificity threshold (over  $TFIDF^{IC}$ ; see following section) used for pruning terms left over from the first threshold; and (3)  $e$ , which defines the density margin that dictates the inclusion or exclusion of a term in a cluster.

The algorithm consists of three steps. First, the initial set of terms is filtered with TFIDF for the creation of clustering seeds (lines 1–3). Second, these clustering seeds are grouped according to their common top-level HPO ancestor—i.e., the top-level HPO abnormality (e.g., blood or skeletal system; line 4). The intuition here is that most diseases affect, in principle, a very limited number of major organs, and hence, most true positives will be grouped according to these major organs (corresponding to the top-level HPO phenotypic abnormality terms). Once the clustering seeds are grouped, we look for the group-based subset of terms that form the single shortest ontological path among them (i.e., the sub-group with the minimum density; lines 5–7). This can be seen as an inverse analogy to the traveling salesman problem, where the shortest path between two terms (i.e., the number of edges required to connect them in the HPO) denotes the cost, and the goal is to minimize the SD of the array of shortest paths. We adapted the Hungarian algorithm to solve this problem. The resulting subset is added to the final list of candidates (line 8).

## Figure 1. Algorithm 1

Summary of the algorithm used to identify a set of HPO term annotated to diseases. See [Material and Methods](#) for explanations.

Finally, the list of terms initially filtered out with TFIDF is pruned with  $TFIDF^{IC}$  (lines 9 and 10), and the terms are grouped according to the top-level HPO abnormalities in the same manner as the clustering seeds (line 11). Incrementally, using the group-based density and set of seeds computed in the previous step, we append each leftover term to the seed subset and compute an aggregated density. If the new density is within the limits established by the density margin error parameter ( $e$ ) with respect to the seed density, then the term is added to the final candidates (lines 12–15).

Given a gold-standard corpus, one of the main advantages of this algorithm is the opportunity for learning diverse values

for the three parameters, subject to a particular goal. For example, the above-mentioned assumption (i.e., diseases affect a very limited set of major organs) can be transformed into a learning task based on disease categories. We experimented with the 41 manually curated diseases, split into 13 categories dictated by the top-level terms (e.g., cardiovascular diseases, integumentary system diseases, etc.) in the Disease Ontology (DO), and aimed to maximize the category-based true-positive rate. This can be realized by learning sets of parameters corresponding to each disease category. The experimental results showed an overall resulting precision of 66.8%, including highlights such as over 70% precision for diseases by infectious agents (73.0%), diseases of the nervous system (77.8%), or immune system diseases (82.8%). Similarly, we experimented with targeting a maximized overall F-score (i.e., the harmonic mean of precision and recall—a balance between coverage and true-positive rate) and achieved a value of 45.1%. This value is equivalent to an average precision of around 60% associated with a recall of around 40%.

## Information Theoretic Measures for HPO Annotations

The algorithm in Figure 1 uses several information theoretic measures, discussed below.

TFIDF is a standard information-retrieval metric for ranking terms on the basis of their co-occurrence and specificity in the context of a given set of documents. In our case, the goal is to rank HPO terms according to their frequency and specificity in the context of a particular disorder. TFIDF is adapted below (to take into account the disorder-specific context), where  $t$  denotes an HPO term,  $D$  denotes the disease under scrutiny, and  $T_D$  represents the total number of disorders (i.e., 3,145).

$$TFIDF(t, D) = TF(t, D) \times IDF(t, D)$$

$TF(t, D)$ , the term frequency of HPO term  $t$  for disease  $D$ , is defined as the number of  $D$ -associated abstracts in which a term  $t$  appears at least once (regardless of the number of mentions in a particular abstract), and the inverse document frequency,

IDF( $t, D$ ), is defined as the logarithm of the quotient of the total number of diseases ( $T_D$ ) divided by the number of diseases for which the HPO term in question is mentioned in at least one abstract.

$$\text{IDF}(t, D) = \log \frac{T_D}{|\{d \in D : t \in d\}|}$$

The IC of an individual HPO term within the MEDLINE corpus can be estimated with its frequency among annotations of the entire corpus. Intuitively, the IC of a term such as “fever” (HP: 0001945) is less than that of a term such as “aortic arch calcification” (HP: 0005303) because fewer diseases are characterized by the latter abnormality, and so knowing that an individual has aortic arch calcification narrows down the differential diagnosis much more than knowing that an individual has fever. For each term  $t$  of the HPO, the IC is quantified as the negative logarithm of its frequency:  $\text{IC}(t) = -\log p(t)$ . If a disease is annotated with any term  $t$  in the HPO, it must also be annotated with all the ancestors of  $t$ . Therefore, the IC of terms is calculated on the basis of annotations with the term or any of its descendants in the HPO.<sup>41</sup> For instance, if seven of 1,000 abstracts are annotated with a certain HPO term  $t'$ , and three more abstracts are annotated with descendants of  $t'$ , then the frequency of the term would be calculated as  $p(t') = 10 / 1,000$ , and the IC of the term would be calculated as  $\text{IC}(t') = -\log p(0.01)$ . The higher (i.e., closer to the root) in the ontology a term is located, the lower its IC. We use this as an additional term to define  $\text{TFIDF}^{\text{IC}}$  for HPO term  $t$  and disease  $D$  as

$$\text{TFIDF}^{\text{IC}}(t, D) = \text{TFIDF}(t, D) \times \text{IC}(t).$$

### Calculation of Phenotypic Overlap with an Extended Jaccard Index

The Jaccard index is a standard measure of similarity between two sample sets,  $A$  and  $B$ , and is defined as the size of the intersection divided by the size of the union of the sample sets:

$$J(A, B) = \frac{|A \cap B|}{|A \cup B|}.$$

The value of the Jaccard index ranges from 0 for complete dissimilarity to 1 for identity. In a typical set-based context, the Jaccard index is computed on the strict intersection and union of the elements. However, in our context these elements represent ontology terms, structured in a logical hierarchy. And, as such, we can rely on the subsumption relation between terms when computing intersection and union. We exploited this aspect in the computation of the Jaccard index. A match between two terms was recorded not only when the two terms matched exactly (i.e., “cranial hyperostosis” is the same as “cranial hyperostosis”) but also when the subsumption relation was present (i.e., “cranial hyperostosis” is a parent of “calvarial hyperostosis” and an ancestor of “mandibular hyperostosis”; [Figure S1](#)).

### Validation of HPO Annotations for Common Disorders

We chose three to five common diseases from each of the 13 DO upper-level categories used in our common-disease network (CDN; see below) for a total of 41 diseases. We used a Perl script to choose diseases at random from among all diseases in the categories. We examined the diseases manually by assessing each HPO term mentioned at least once in any abstract describing the disease in question (thus, we evaluated substantially more HPO terms

than merely the set of terms chosen by our annotation pipeline on the basis of frequency and specificity of the term). Biocuration was performed by N.V., G.B., D.V., A.Z., M.H., and P.N.R., and all annotations were validated by P.N.R., who is both a computer scientist and a medical doctor. This allowed us to assess the true-positive, false-positive, and false-negative rates as shown in [Tables S1–S41](#).

### CDN

In order to validate and visualize the phenotype annotations obtained for common disease, we constructed a CDN by computing the pairwise similarity of a total of 1,678 diseases (i.e., annotated MeSH entries) belonging to 13 DO categories such as “nervous system disease” (DOID: 863) or “respiratory system disease” (DOID: 1579) ([Figure S2](#)). Note that some diseases belong to multiple DO classes ([Figure S3](#)).

For each disease, we obtained all the HPO annotations that our CR algorithm had associated with the disease. The annotation frequency of a term was defined as the proportion of diseases that were annotated by the term or any of its descendent terms. In order to calculate similarity between two terms ( $t_1, t_2$ ), we used the IC of their most informative common ancestor (MICA),<sup>3</sup> denoted as  $\text{MICA}(t_1, t_2)$ .

We used the above-mentioned term-similarity measures to calculate a semantic-similarity score for two diseases ( $D_1, D_2$ ). In our case, for each of the terms of  $D_1$ , the “best match” among the terms annotated  $D_2$  was found, and the average overall query terms was calculated. This was defined as the similarity:

$$\text{sim}(D_1 \rightarrow D_2) = \text{avg} \left[ \sum_{s \in D_1} \max_{t \in D_2} \text{IC}(\text{MICA}(s, t)) \right],$$

where the average was taken over all terms  $s$  to which disease  $D_1$  is annotated. Note that this score is asymmetric, i.e., it is not necessarily the case that  $\text{sim}(D_1 \rightarrow D_2) = \text{sim}(D_2 \rightarrow D_1)$ . Therefore, for the analysis described here, we used a symmetric similarity score:

$$\text{sim}(D_1, D_2) = \frac{1}{2} \text{sim}(D_1 \rightarrow D_2) + \frac{1}{2} \text{sim}(D_2 \rightarrow D_1).$$

The CDN consists of nodes that represent common diseases and edges that indicate that two diseases are phenotypically similar. In order to create the CDN, we calculated the symmetric similarity score for all pairs of diseases. The network was visualized with the force-directed layout algorithm of Cytoscape,<sup>42</sup> whereby an edge between nodes was drawn if the similarity between two corresponding diseases exceeded 2.0 (simulation cutoff [simcut]). The final CDN (CDN-o) consisted of 1,148 diseases and 4,059 edges.

### Statistical Significance of the CDN

In order to test the statistical significance of the distribution of phenotypic similarity among diseases within the same disease category or between different categories, we introduced the concept of the gray-edge fraction (GEF). That is, we visualized edges between nodes (diseases) that do not belong to one of the same 13 general disease categories as gray edges. The GEF was defined as the proportion of gray edges among all edges in the CDN. The lower the GEF, the better the phenotypic clustering of diseases agrees with the classification of the diseases into the 13 categories. The original CDN (CDN-o) comprised 3,547 edges, 998 of which were gray edges, corresponding to a GEF of 0.246 (red arrow in [Figure S4A](#)). We tested two randomization procedures, edge randomization (er) and annotation randomization (ar).

The edge-permutation procedure retains the number of edges and the degree distribution of the network.<sup>43</sup> Two edges, A-B and X-Y, are chosen at random and reshuffled to create the edges A-Y and X-B. Reshuffling is skipped if the edges A-Y and X-B already exist. Reshuffling is performed 10,000 times, resulting in an edge-randomized version of CDN-o, which we call CDN-er and for which we can again compute the GEF. We constructed 1,000 versions of CDN-er and plotted the distribution of the resulting GEF values in [Figure S4A](#). As one can see, the p value of the CDN is less than 0.001 because none of the edge-randomized CDNs achieved the same or a smaller GEF than the original CDN.

We additionally performed a test in which we randomized the HPO terms associated with each disease (ar). For this, we randomly selected 50% of the terms associated with each disease and replaced them with randomly selected HPO terms. We computed the randomized CDN (called CDN-ar) by using the above procedures used to construct the CDN-o. We repeated this procedure 100 times and computed the GEF for each CDN-ar. Note that each CDN-ar might not have the same amount of nodes and edges as the CDN-o. When using the same simcut (2.0) used for constructing the CDN-o, we obtained much smaller networks (fewer than 100 nodes). The distribution of GEF values of CDN-ar with simcut 2.0 is shown in [Figure S4B](#). No CDN-ar achieved a GEF less than or equal to the CDN-o GEF, which corresponds to a p value of less than 0.01. We modified the simcut to 1.4 because it leads to CDN-ar versions with approximately the same amount of nodes as CDN-o. The distribution of the resulting GEF values is shown in [Figure S4C](#). Again, not a single CDN-ar constructed with a simcut of 1.4 achieved a GEF less than or equal to the CDN-o GEF, which corresponds to a p value of less than 0.01.

## GWAS Data

GWAS Central provides a comprehensive collection of summary-level genetic-association data and advanced visualization tools to allow comparison and discovery of datasets from the perspective of genes, genome regions, phenotypes, or traits.<sup>33</sup> The project collates association data and study metadata from many disparate sources, including the National Human Genome Research Institute GWAS Catalog,<sup>35</sup> and receives frequent data submissions from researchers who wish to make their research findings publicly available. All gathered and submitted data are extensively curated by a team of post-doctoral genetics researchers who manually evaluate each study for its range of phenotype content and apply appropriately chosen MeSH terms. As of December 2014, the resource contained 69 million p values for over 1,800 studies.

Data and metadata for up to 1,000 associations can be freely downloaded from the BioMart-based system (GWAS Mart), and larger custom data dumps (up to and including the complete database) are available via contacting the GWAS Central development team and agreeing with a data-sharing statement. Thus, to provide data for the present study, we generated a tab-separated file representing 1,574 studies and 34,252 unique SNPs (annotated to 675 unique MeSH terms) and containing the GWAS Central study identifier, PubMed identifier, dbSNP “rs” identifier, p value, and MeSH identifier for all associations with  $p < 1 \times 10^{-5}$ . We compiled the list of genes considered for our experiments by retrieving the “mapped genes” column from the database SCAN and identifying those genes corresponding to the GWAS Central

SNPs. Where no mapped genes were reported, we used the upstream, as well as downstream, genes listed by SCAN.<sup>44</sup>

## Results

### Generation of Phenotype Annotations for Common Disease by CR

We applied a phenotype-aware CR system (the Bio-LarK Concept Recognizer<sup>40</sup>) to all available abstracts in PubMed in order to extract phenotypic annotations for common diseases. We first retrieved the MeSH terms associated with PubMed abstracts and used them to retain only those abstracts focused on diseases. 5,136,645 of 22,376,811 articles listed in PubMed had an abstract and could be assigned to such a MeSH disease term (see [Material and Methods](#) for a description of our inclusion criteria for MeSH disease entries; a total of 3,145 diseases were included). Second, we applied CR on the resulting set, after which a total of 930,805 HPO annotations were assigned to 3,145 common diseases. Finally, we filtered this initial set of HPO terms, by using a ranking-and-clustering method with the aim of maximizing the F-score computed on a manually curated gold-standard set of 41 common diseases (see [Material and Methods](#)). This approach aims to maximize the text-mining accuracy, defined as the harmonic mean of the precision and recall of the derived annotations. This final set comprised 132,006 HPO annotations covering 4,459 unique HPO terms. The mean number of annotations per disease was 41.97 (range, 1–271; median, 32) and consisted of terms belonging to all of the top-level HPO categories ([Figure S5](#)). [Figure 2](#) provides an overview of the analysis procedures used to generate and validate the common-disease annotations.

As an example, [Table S1](#) lists the annotations produced for “giant cell arteritis” (MeSH: D013700), which includes terms such as “vasculitis” (HP: 0002633), “granulomatosis” (HP: 0002955), and “amaurosis fugax” (HP: 0100576). The annotations are highly accurate, although some nuances are not detected by the CR process. For instance, “facial palsy” (HP: 0010628) and “renal amyloidosis” (HP: 0001917) are classic manifestations of giant cell arteritis. The list of phenotypic manifestations is by no means complete, given that it failed to identify manifestations such as “dysphagia” (HP: 0002015), “trismus” (HP: 0000211), and “encephalopathy” (HP: 0001298). Nonetheless, the CR process was able to capture a largely accurate subset of phenotypic abnormalities for giant cell arteritis, such that 64% of the annotations were true positives.

We estimated the overall quality of the HPO annotations by inspecting the automatically extracted annotations for a set of 41 common diseases randomly chosen from 13 upper-level DO<sup>45</sup> categories that had a MeSH disease identifier and thus could be analyzed analogously to the common MeSH diseases. The process involved manually validating of all HPO annotations extracted by the CR process and comparing them to the results of detailed manual curation

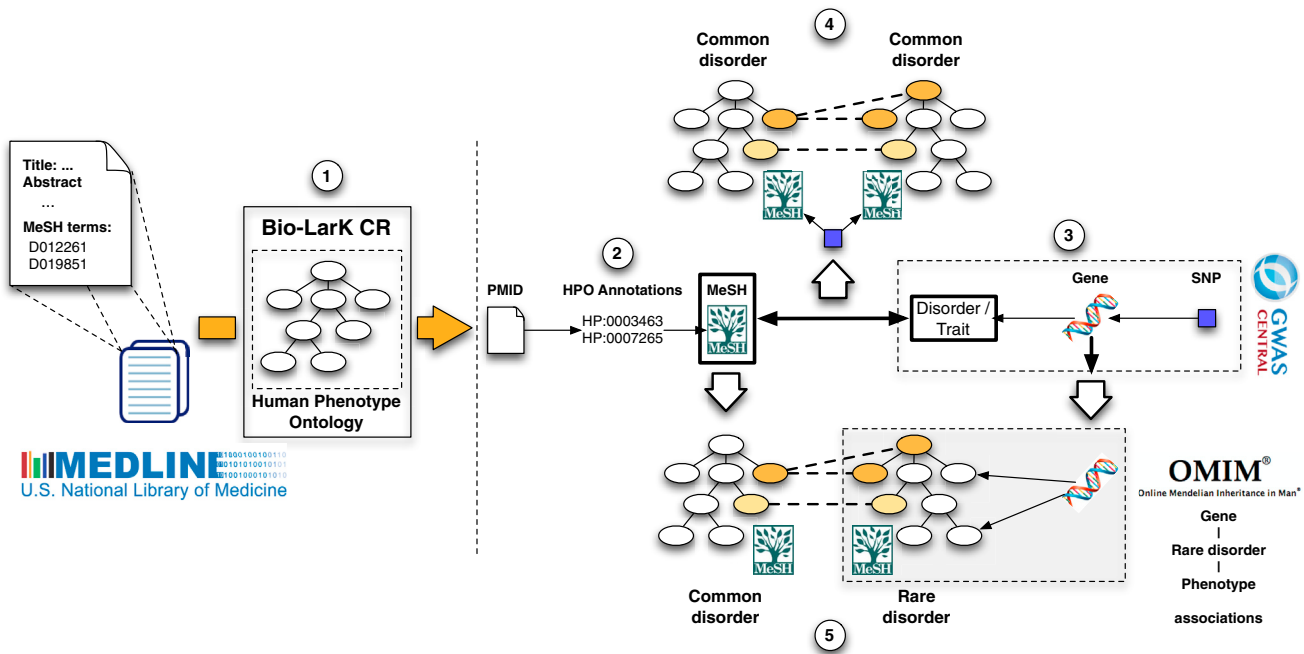

**Figure 2. Overview of CR and Bioinformatic Analysis**

The analysis was performed in several major steps. (1) Bio-LarK was used to analyze the PubMed-MEDLINE 2014 corpus, which resulted in a total of 5,136,645 abstracts annotated with MeSH terms and phenotypic features. (2) For each of 3,145 resulting diseases, the frequency and specificity of HPO terms found in the abstract were used for inferring phenotypic annotations. (3) These annotations were used for producing disease models for each of the diseases. (4) Medical validation of the annotations was performed on the basis of disease, phenotype, and SNP annotations in GWAS Central for phenotype sharing in common disease. (5) Validation with OMIM, Orphanet, and DO was used for assessing phenotype sharing between rare and common diseases linked to the same locus.

for the estimation of the true- and false-positive and the false-negative rates. We note that it is not informative to calculate a true-negative rate across the entire HPO because even if the CR process flags several hundred terms, the great majority of the over 10,000 HPO terms will be true negatives. We found that maximizing the overall F-score (i.e., the harmonic mean of precision and recall) led to a mean F-score of 45.1% (i.e., a mean precision of around 60% accompanied by a mean recall of around 40%). In separate experiments, we found that a CR run with parameters designed to maximize the precision in each of the 13 categories achieved a mean precision of 66.8% (data not shown). However, we chose to use the annotations derived from the F-score procedure for the remainder of the analysis. The complete set of annotations associated with the 41 common diseases, including flags for true positives, false positives, and false negatives, can be found in [Tables S1–S41](#).

### A Common-Disease Phenotypic Network

As a first test of the medical validity of the HPO annotations for common-disease phenotypes, we visualized the network of phenotypic similarity of a subset of 1,678 diseases, such as “nervous system disease” (DOID: 863) or “respiratory system disease” (DOID: 1579), belonging to 13 DO categories. 1,148 of the 1,678 diseases showed at least one connection to another disease (phenotypic similarity score above a threshold of 2.0), and thus the final CDN comprised 1,148 diseases. Phenotypic relationships

between these diseases are shown by the linking of all pairs of diseases exceeding the threshold similarity score ([Figure 3](#)). Although generated independently of the disorder classes, the resulting phenotypic network clearly displays clusters corresponding to the disease categories.

We then constructed randomized phenotypic networks as described in the [Material and Methods](#) and calculated the number of links between diseases from the same disease category. We found that the observed correlation between network connections and disease class is highly significant ([Figure S4](#)). Thus, the phenotypic network of common diseases, as defined by the HPO, is made up of dense clusters of shared phenotypic features that show characteristic patterns of interconnections between selected areas of the phenotypic continuum, just as we had previously observed for Mendelian diseases.<sup>2</sup> The high correlation between the computationally created network clusters and the manually curated disease classifications provides further evidence that the automatically created annotations are clinically meaningful and provide a largely correct description of the disease in question.

### Phenotypic and Genetic Overlap across Complex Diseases

GWASs have been performed for a wide range of common diseases and traits, and over 6,000 strong SNP associations ( $p < 10^{-8}$ ) have been identified.<sup>35</sup> Variation at multiple genetic loci collectively influences the likelihood of

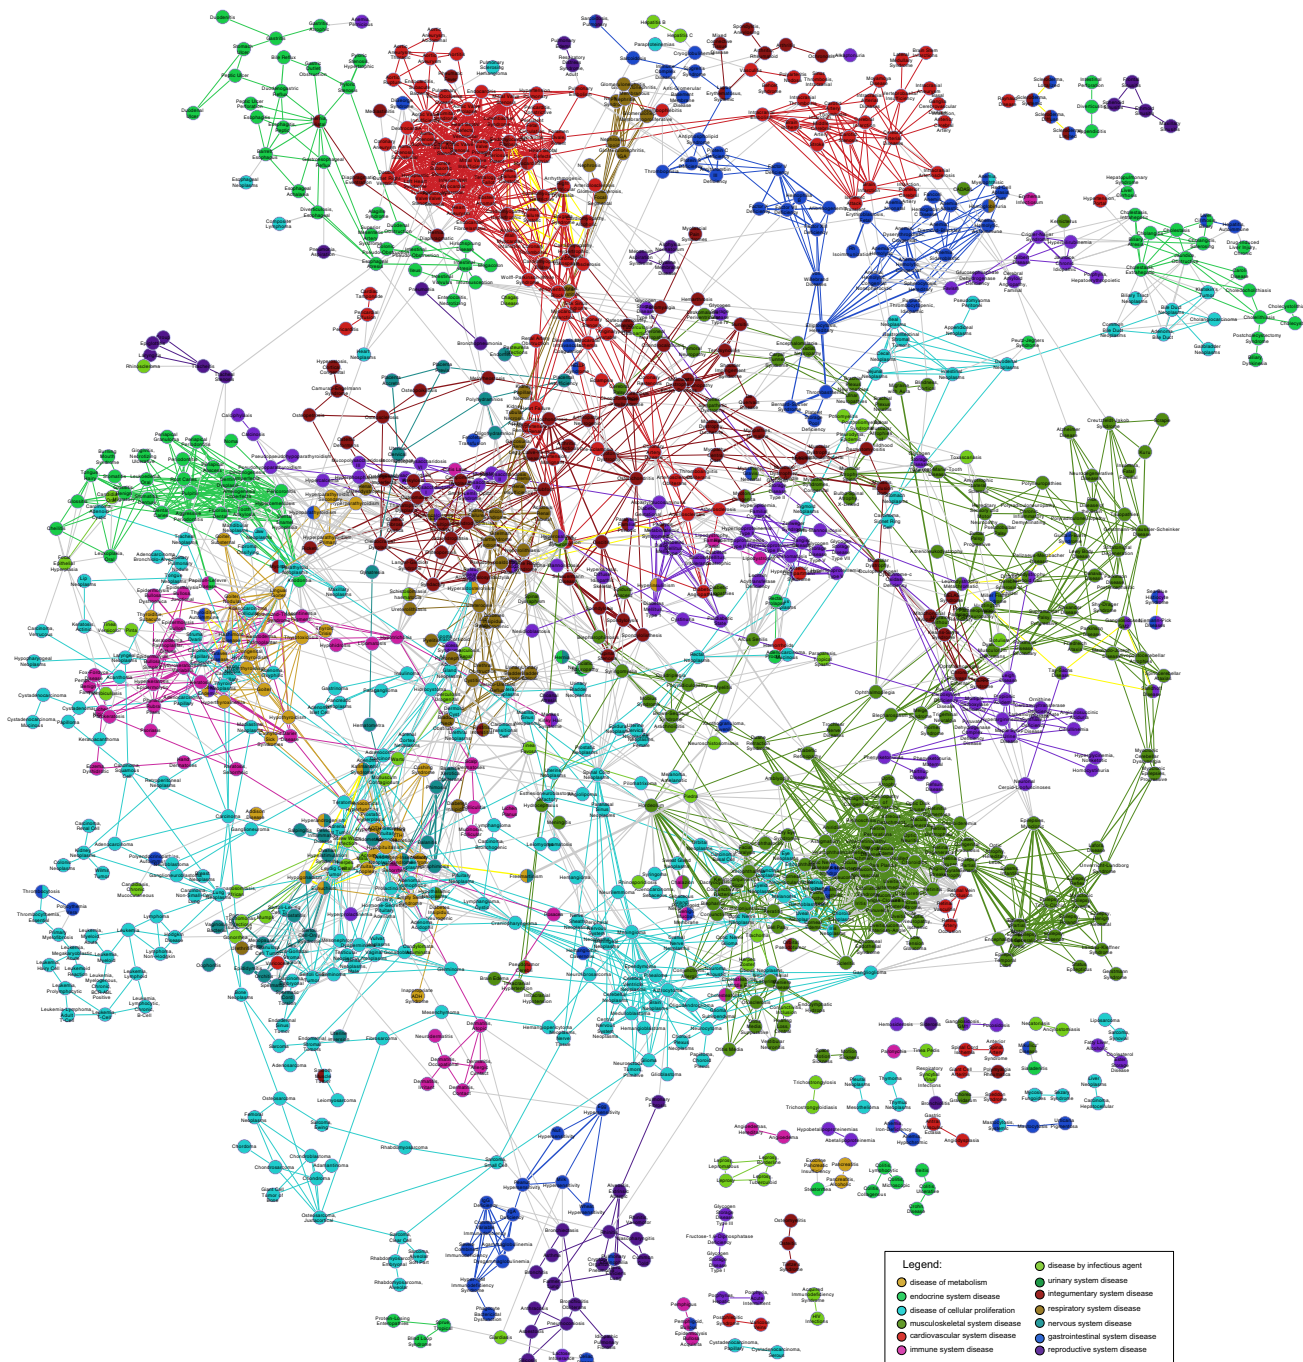

**Figure 3. Phenotypic Network of Common Disease**

A total of 1,678 common diseases could be mapped to at least one of 13 top-level DO categories (Figures S5 and S6). 1,148 of these diseases displayed a connection to another disease with a phenotypic similarity score of at least 2.0. They are shown as a node in the graph and are colored according to membership in the upper-level disease categories. The thickness of the connections between the nodes reflects the degree of phenotypic similarity

developing many common and complex diseases; for instance, it is estimated that that about 8,300 independent and predominantly common SNPs contribute to risk for schizophrenia<sup>46</sup> (MIM: 181500). Although the genetic architecture is likely to differ for different diseases, often the trait architecture consists of a few loci of relatively large effect and many additional loci that have a very small effect on phenotype.<sup>47</sup> To understand the genetics of complex disease, it is

important to consider the phenotypic and genetic overlap among diseases. For instance, susceptibility loci that are common to both multiple ulcerative colitis and Crohn disease have been identified by GWASs, and some of these loci are even shared with several other autoimmune disorders.<sup>48</sup> Similarly, several psychiatric disorders share risk loci.<sup>49</sup> The study of the distribution of overlapping loci within a group of diseases might suggest shared pathways

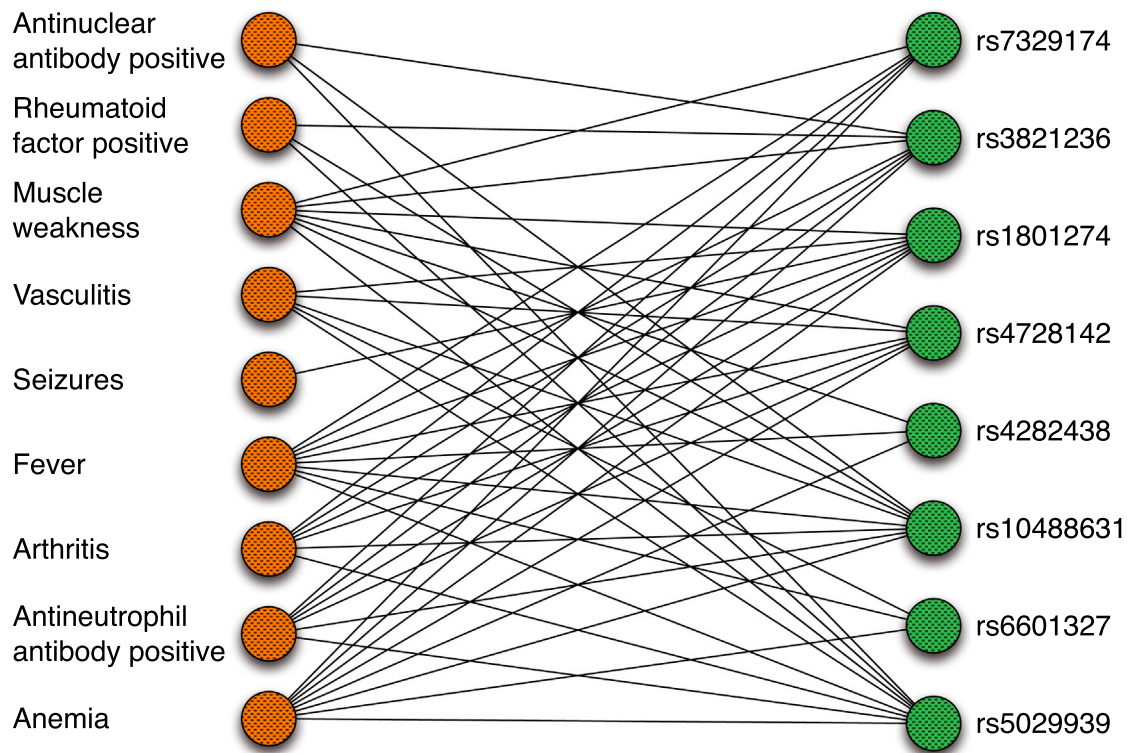

**Figure 4. Phenotype-SNP Network**

For constructing this network, individual HPO terms were connected to SNPs if the SNP was significantly associated with a disease characterized by the HPO term in question. For instance, the SNP rs5029939 is significantly associated with both Sjögren syndrome<sup>51</sup> and systemic lupus erythematosus.<sup>52</sup> The diseases also share a number of phenotypic features, including “antinuclear antibody positivity” (HP: 0003493) and “xerostomia” (HP: 0000217). A small and particularly dense subset of the network was manually chosen. The network is centered on ten HPO terms representing clinical features that are common in autoimmune diseases.

and common pathogenetic features.<sup>23</sup> On the other hand, the lack of overlap of other loci could help to identify pathogenetic mechanisms that are unique to specific diseases and could help to explain phenotypic diversity across the spectrum of diseases in fields such as autoimmunity or psychiatry.<sup>50</sup> The computational resources presented here offer a tool for comprehensively measuring the phenotypic overlap of a wide range of common diseases that share risk loci.

From the total of 16,152 unique SNPs, 863 were associated with more than one disorder, and the total number of unique disorders was 300. 673 SNPs were associated with two disorders, 130 were associated with three, and 60 were associated with more than four (Figure S6). 577 of these SNPs were associated with a total of 79 unique diseases in our corpus and were used for the following analysis.

The mean Jaccard index for the pairwise comparison on the 577 SNPs was  $0.251 \pm 0.132$ . That is, for each pair of SNPs, the phenotypic annotations of the corresponding diseases were compared to each other with the extended Jaccard index (Figure S1). Randomly chosen disease comparisons from the existing pool of MeSH diseases displayed a significantly lower overlap of  $0.130 \pm 0.094$  ( $p = 2.29 \times 10^{-57}$ , paired t test). Our results show a pervasive phenotypic sharing among complex diseases that are also associated with the same SNP. As an example, we show an excerpt of the phenotype-SNP network centered on autoim-

mune phenotypes. Ten phenotypic abnormalities observed in persons with these diseases are shown together with SNPs associated with one or more diseases displaying these features, such as Sjögren syndrome (MIM: 270150) and systemic lupus erythematosus (MIM: 152700). It can be seen that there is a dense interconnected network of phenotypes and SNPs (Figure 4). These results extend recent findings concerning a human disease-symptom network based on 322 individual symptoms extracted from MeSH.<sup>53</sup> We provide a CDN browser that allows users to navigate through the network of common diseases that are interconnected by phenotypic similarity (Figure S7).

#### Phenotypic and Genetic Overlap across Complex and Mendelian Diseases

Numerous, highly penetrant mutations in individual genes have been identified in thousands of Mendelian diseases. Common variants associated with complex diseases are enriched in genes mutated in Mendelian diseases.<sup>54</sup> For instance, certain mutations in presenilin 1 (*PSEN1*) cosegregate with early-onset familial Alzheimer disease<sup>55</sup> (MIM: 607822), whereas variants in the *PSEN1* promoter are associated with increased risk for complex (non-Mendelian) Alzheimer disease.<sup>56</sup> Similarly, common polymorphisms associated with blood lipoprotein concentrations are often located in the genomic vicinity of genes



**Table 1. Phenotypic Overlap between Rare and Complex Disorders**

| Gene: Associated Rare Disease                                                                        | Reference SNP: Complex Disease                     | Common HPO Terms                                                                                                                          |
|------------------------------------------------------------------------------------------------------|----------------------------------------------------|-------------------------------------------------------------------------------------------------------------------------------------------|
| <i>CD247</i> : immunodeficiency due to defect in CD3- $\zeta$ (MIM: 610163)                          | rs840016: rheumatoid arthritis <sup>59</sup>       | edema (HP: 0000969), arthralgia (HP: 0002829), arthritis (HP: 0001369), autoimmunity (HP: 0002960)                                        |
| <i>FSHR</i> : ovarian hyperstimulation syndrome (MIM: 608115) and ovarian dysgenesis 1 (MIM: 233300) | rs2268361: polycystic ovary syndrome <sup>60</sup> | abnormality of the ovary (HP: 0000137), decreased fertility (HP: 0000144), primary amenorrhea (HP: 0000786)                               |
| <i>PPARG</i> : lipodystrophy, familial partial, type 3 (MIM: 604367)                                 | rs13081389: type 2 diabetes mellitus <sup>61</sup> | hyperglycemia (HP: 0003074), hyperinsulinemia (HP: 0000842), hypertension (HP: 0000822)                                                   |
| <i>LPL</i> : type I hyperlipoproteinemia (MIM: 238600)                                               | rs295: metabolic syndrome X <sup>62</sup>          | hypercholesterolemia (HP: 0003124), hyperlipoproteinemia (HP: 0010980), coronary artery disease (HP: 0001677), pancreatitis (HP: 0001733) |
| <i>LRK2</i> : Parkinson disease 8 (MIM: 607060)                                                      | rs34778348: Parkinson disease <sup>63</sup>        | rigidity (HP: 0002063), bradykinesia (HP: 0002067), dementia (HP: 0000726), resting tremor (HP: 0002322)                                  |
| <i>HCN4</i> : sick sinus syndrome 2 (MIM: 163800)                                                    | rs7164883: atrial fibrillation                     | arrhythmia (HP: 0011675), tachycardia (HP: 0001649), sinus brachycardia (HP: 0001688)                                                     |
| <i>HYDIN</i> : ciliary dyskinesia, primary, 5 (MIM: 608647)                                          | rs12149070: COPD <sup>64</sup>                     | respiratory tract infection (HP: 0011947), respiratory insufficiency (HP: 0002093), bronchiectasis (HP: 0011947)                          |

GWAS hits localized in the vicinity of Mendelian-disease-associated genes could be associated with common diseases that have phenotypic overlaps with the corresponding Mendelian diseases. Seven examples in which common and rare diseases linked to neighboring loci and showed substantial phenotypic overlap were manually chosen. The protein-coding gene associated with the rare disease, as well as the accession number of the polymorphism located in non-coding sequence near the gene, is shown. The following abbreviation is used: COPD, chronic obstructive pulmonary disease.

associated with Mendelian disorders of lipoprotein metabolism, such as *ABCG8*, *LCAT*, *APOB*, *LDLR*, *PCSK9*, *CETP*, *LPL*, *LIPC*, and *ABCA1*.<sup>57,58</sup> We therefore reasoned that the phenotypic-genetic overlap might be a general tendency for rare and common diseases located at the same genetic locus. As per the method described above, we examined 485 genes shared between the complex-(GWAS) and rare-disease datasets. GWAS SNPs were previously mapped to genes with SCAN.<sup>44</sup> In a manner similar to that used in the common-disease-phenotype experiment, we then measured the phenotypic overlap between the complex diseases from GWAS Central<sup>33</sup> and rare, Mendelian diseases associated with the genes in question. The overlap measure used in the experiments was the Jaccard index and was computed in the same manner as in the case of the complex-disease overlap. This resulted in a mean value of  $0.027 \pm 0.032$ , which was higher than the corresponding value for randomized pairs of common and rare disease (same procedure as above),  $0.021 \pm 0.023$  ( $p = 1.6 \times 10^{-7}$ , paired t test). Table 1 shows some examples of GWAS hits that are linked to genes in which mutations cause Mendelian diseases with phenotypic overlap.

## Discussion

Translational research in Mendelian diseases has benefited enormously from databases of the phenotypic features

associated with individual diseases, such as OMIM,<sup>65</sup> Orphanet,<sup>66</sup> and more recently the HPO.<sup>1,2</sup> Analysis of such data has led to the idea that diseases that display similar phenotypic features are caused by mutations in functionally related genes. For instance, genetically heterogeneous diseases such as Fanconi anemia, Bardet-Biedl syndrome, or Usher syndrome are related to mutations in genes of a single biological module. Such modules can be a multiprotein complex, a pathway, or a single cellular or subcellular organelle.<sup>67-70</sup> To date, however, it has been difficult to perform analogous research on complex-disease phenotypes because resources to carry out comparable analyses have been lacking.

GWASs emerged in the first decade of the new millennium as a powerful tool for elucidating the genetic architecture of common disease.<sup>33,35</sup> The advent of clinical whole-genome sequencing<sup>71</sup> (WGS) is promising to lead to personalized genomic medicine. It is becoming apparent that precise phenotype analysis can substantially improve the ability to interpret the results of NGS. In rare diseases, for instance, diagnostic NGS yields plausible candidate variants in several genes, and making diagnoses will require that the consequences of these variants be analyzed and integrated with clinical findings.<sup>72</sup> In fact, using the HPO to analyze phenotypic data has been shown by multiple groups to improve the ability of NGS-based methods to identify candidate disease-associated genes and make clinical diagnoses.<sup>5-11,21</sup> These methods have been tested on

exomes and large NGS gene panels. In contrast, WGS provides a nearly comprehensive view on non-coding variations, a class of variation that makes up the majority of known risk factors for common disease.<sup>35</sup> WGS currently cannot be used reliably for the prediction of common disease in a clinical diagnostic setting.<sup>73</sup> However, this is increasingly becoming a topic of bioinformatics research<sup>37,74,75</sup> and is likely to increase in importance as large-scale efforts such as the UK's 100,000 Genomes Project begin to produce and interpret data. We speculate that phenotype analysis will be just as beneficial to WGS-based diagnostics of common disease as it has been shown to be for rare disease.<sup>5–11,76,77</sup> One area of particular interest stems from the observation that genes harboring common variants associated with a common disease might also carry large-effect mutations in a subset of individuals at the extremes of the trait. For instance, the polymorphism rs6817105, which is located about 167,000 nt upstream of *PITX2*, was found to be associated with atrial fibrillation.<sup>78</sup> More recently, a de novo nucleotide substitution in the promoter region of *PITX2* (319 nucleotides upstream of the transcription start site) was identified in an individual with severe atrial fibrillation.<sup>79</sup> Observations such as this and those summarized in [Table 1](#) suggest that rare-disease phenotypes will be extremely useful in evaluating the findings of WGS performed on individuals with common, complex diseases and underline the utility of annotating rare and common diseases with a common phenotype ontology.

To generate the resource, we developed a statistical framework to evaluate the pattern of co-occurrences of HPO terms (phenotypic features) and diseases in PubMed abstracts. Previous efforts in the field of clinical text mining have shown the enormous promise of data extraction from articles or electronic health records (EHRs) for translational research; one of the keys to tapping this resource lies in the ability to reliably extract clinical information from the EHRs by text mining and other methods.<sup>80</sup> For instance, phenome-wide association scans (PheWASs) search EHRs for disease-gene associations by using the International Classification of Disease (ICD9) billing codes, which are available in most EHR systems, and have been shown to be able to replicate findings of traditional GWASs and identify novel associations.<sup>81,82</sup> Other groups have used EHR data to detect adverse medication interactions.<sup>83</sup> The project presented here had different goals, in that we developed a statistical model to infer the spectrum of phenotypic abnormalities that characterize diseases rather than to classify individuals' records according to whether a certain disease was present or not (as has been the case for the majority of the PheWASs and similar studies published to date; we note that many of these studies utilized the word "phenotype" to refer to a disease entity, whereas our study has examined the individual phenotypic features of diseases).

The algorithms we developed to derive disease models from the annotation patterns of PubMed abstracts com-

bined a number of components, including (1) semantic CR (Bio-LarK<sup>40</sup>); (2) an adaptation of the TFIDF method, whereby diseases take the place of documents, and the "document frequency" of individual HPO terms is calculated from the number of abstracts containing the term; (3) an evaluation of the IC of individual HPO terms for calculating the semantic similarity<sup>84,85</sup> between terms; and (4) a heuristic graph clustering method that attempts to extend seed terms with particularly high TFIDF values to create a dense phenotypic network. This allowed us to develop annotations for over 3,000 common, complex diseases, and we demonstrated the potential utility of the resource by an analysis of phenotypic overlap between common and rare disease, as well as between complex diseases that share one or more genetic associations. The platform we have made available, together with the data, is in itself a valuable resource for the community. In addition to providing a way to download the data in a tab-separated form, or to access it programmatically via application programming interfaces, the website also enables a phenotype- and disorder-centric browsing of MEDLINE abstracts and browsing within the CDN ([Figure S7](#)). This resource could be useful for physicians who are caring for persons with a given disease and who present with a particular manifestation or complication of that disease (denoted by an HPO term). The browser will present all PubMed abstracts that were identified in our study and that describe both the disease and the phenotypic manifestation, which might provide information that could be helpful in clinical management.

There are several limitations of the common-disease annotations that we have presented here. First and foremost, the annotations were derived by a computational CR (text-mining) process and contain both false-positive and false-negative annotations. The HPO project, which is being developed as a part of the Monarch Initiative, will be actively revising and expanding the annotations and developing new areas of the ontology itself as needed for the analysis of common disease, much as it has been doing in the field of rare diseases since 2007.<sup>1,2</sup> Several characteristics of particular importance to common diseases, such as the past medical history and the time course of disease, are not currently well captured by the computational data structures and algorithms that have been developed for rare disease and will need to be established in future work. The results of the analysis of phenotypic overlaps are highly statistically significant but do not provide proof of a common pathophysiological basis of the diseases involved. However, we contend that the results we have presented in this manuscript demonstrate that the common-disease HPO annotations can be used for the computational analysis of phenotypic abnormalities across a previously unheard-of range of rare and common diseases, including over 7,000 rare diseases and 3,145 common diseases. To the best of our knowledge, there is no comparable computational resource that provides both an extensive phenotype ontology and annotations to over 10,000

diseases, as well as an algorithmic basis for calculating the similarity between arbitrary sets of phenotypic abnormalities and specific diseases<sup>3</sup> and a foundation for translational research on topics such as cross-species phenotype mapping.<sup>6,23</sup>

The HPO project has been under development since 2007 and has mainly focused on rare and primarily Mendelian diseases.<sup>1,2</sup> The work presented here provides users with over 132,000 phenotypic annotations for 3,145 common diseases derived via text mining. It is hoped that these annotations, as well as the underlying HPO terms, will be useful for both clinicians and researchers. Future work will include biocuration efforts to validate and extend the current set of annotations, to add metadata such as the age of onset, severity, clinical course, and response to treatments, and to extend the HPO to provide an even broader range of terms for the manifestations of complex disease, with the intention of providing a comprehensive resource for translational bioinformatics across the entire spectrum of human disease.

### Supplemental Data

Supplemental Data include 7 figures and 41 tables and can be found with this article online at <http://dx.doi.org/10.1016/j.ajhg.2015.05.020>.

### Acknowledgments

This work was supported by the Bundesministerium für Bildung und Forschung (project 0313911), the European Commission Seventh Framework Programme (FP7; grant 602300; SYBIL project), the Raine Clinician Research Fellowship (20140101), and the National Health and Medical Research Council of Australia (grant APP1055319, which is partnered with FP7 grant 305444). Oregon Health and Science University acknowledges the support of grant 1R24OD011883-01 from the NIH Office of the Director. T.G. was supported by an Australian Research Council Discovery Early Career Researcher Award (DE120100508). D.V. was supported in part by the BioMedBridges project funded by Research Infrastructures of the FP7 (grant 284209). H.P. was supported by European Molecular Biology Laboratory Core Funds. This work was supported by the director, Basic Energy Sciences, Office of Science, US Department of Energy under contract DE-AC02-05CH11231 and NIH contract 1R24OD011883-01. This document was prepared as an account of work sponsored by the US Government. While this document is believed to contain correct information, neither the US Government nor any agency thereof, nor the Regents of the University of California, nor any of their employees makes any warranty, express or implied, or assumes any legal responsibility for the accuracy, completeness, or usefulness of any information, apparatus, product, or process disclosed or represents that its use would not infringe privately owned rights. The views and opinions of authors expressed herein do not necessarily state or reflect those of the US Government or any agency thereof or the Regents of the University of California.

Received: March 20, 2015

Accepted: May 22, 2015

Published: June 25, 2015

### Web Resources

The URLs for data presented herein are as follows:

Bio-LarK, <http://bio-lark.org/>

Common Disease Phenotype Browser, <http://pubmed-browser.human-phenotype-ontology.org/>

GWAS Central, <http://help.gwascentral.org/info/data/data-sharing-statement/>

Human Phenotype Ontology, <http://www.human-phenotype-ontology.org/>

Monarch Initiative, <http://monarchinitiative.org>

OMIM, <http://omim.org/>

### References

1. Köhler, S., Doelken, S.C., Mungall, C.J., Bauer, S., Firth, H.V., Bailleul-Forestier, I., Black, G.C., Brown, D.L., Brudno, M., Campbell, J., et al. (2014). The Human Phenotype Ontology project: linking molecular biology and disease through phenotype data. *Nucleic Acids Res.* 42, D966–D974.
2. Robinson, P.N., Köhler, S., Bauer, S., Seelow, D., Horn, D., and Mundlos, S. (2008). The Human Phenotype Ontology: a tool for annotating and analyzing human hereditary disease. *Am. J. Hum. Genet.* 83, 610–615.
3. Köhler, S., Schulz, M.H., Krawitz, P., Bauer, S., Dölken, S., Ott, C.E., Mundlos, C., Horn, D., Mundlos, S., and Robinson, P.N. (2009). Clinical diagnostics in human genetics with semantic similarity searches in ontologies. *Am. J. Hum. Genet.* 85, 457–464.
4. Bauer, S., Köhler, S., Schulz, M.H., and Robinson, P.N. (2012). Bayesian ontology querying for accurate and noise-tolerant semantic searches. *Bioinformatics* 28, 2502–2508.
5. Soden, S.E., Saunders, C.J., Willig, L.K., Farrow, E.G., Smith, L.D., Petrikin, J.E., LePichon, J.B., Miller, N.A., Thiffault, I., Dinwiddie, D.L., et al. (2014). Effectiveness of exome and genome sequencing guided by acuity of illness for diagnosis of neurodevelopmental disorders. *Sci Transl Med.* 6, 265ra16.
6. Robinson, P.N., Köhler, S., Oellrich, A., Wang, K., Mungall, C.J., Lewis, S.E., Washington, N., Bauer, S., Seelow, D., Krawitz, P., et al.; Sanger Mouse Genetics Project (2014). Improved exome prioritization of disease genes through cross-species phenotype comparison. *Genome Res.* 24, 340–348.
7. Masino, A.J., Dechene, E.T., Dulik, M.C., Wilkens, A., Spinner, N.B., Krantz, I.D., Pennington, J.W., Robinson, P.N., and White, P.S. (2014). Clinical phenotype-based gene prioritization: an initial study using semantic similarity and the human phenotype ontology. *BMC Bioinformatics* 15, 248.
8. Sifrim, A., Popovic, D., Tranchevent, L.C., Ardeshtirdavani, A., Sakai, R., Konings, P., Vermeesch, J.R., Aerts, J., De Moor, B., and Moreau, Y. (2013). eXtasy: variant prioritization by genomic data fusion. *Nat. Methods* 10, 1083–1084.
9. Javed, A., Agrawal, S., and Ng, P.C. (2014). Phen-Gen: combining phenotype and genotype to analyze rare disorders. *Nat. Methods* 11, 935–937.
10. Singleton, M.V., Guthery, S.L., Voelkerding, K.V., Chen, K., Kennedy, B., Margraf, R.L., Durtschi, J., Eilbeck, K., Reese, M.G., Jorde, L.B., et al. (2014). Phevor combines multiple biomedical ontologies for accurate identification of disease-causing alleles in single individuals and small nuclear families. *Am. J. Hum. Genet.* 94, 599–610.
11. Zemojtel, T., Kohler, S., Mackenroth, L., Jager, M., Hecht, J., Krawitz, P., Graul-Neumann, L., Doelken, S., Ehmke, N.,

- Spielmann, M., et al. (2014). Effective diagnosis of genetic disease by computational phenotype analysis of the disease-associated genome. *Sci Transl Med.* 6, 252ra123.
12. Gottlieb, A., Stein, G.Y., Ruppin, E., and Sharan, R. (2011). PREDICT: a method for inferring novel drug indications with application to personalized medicine. *Mol. Syst. Biol.* 7, 496.
  13. Bayés, A., van de Lagemaat, L.N., Collins, M.O., Croning, M.D., Whittle, I.R., Choudhary, J.S., and Grant, S.G. (2011). Characterization of the proteome, diseases and evolution of the human postsynaptic density. *Nat. Neurosci.* 14, 19–21.
  14. Castellano, S., Parra, G., Sánchez-Quinto, F.A., Racimo, F., Kuhlwilm, M., Kircher, M., Sawyer, S., Fu, Q., Heinze, A., Nickel, B., et al. (2014). Patterns of coding variation in the complete exomes of three Neandertals. *Proc. Natl. Acad. Sci. USA* 111, 6666–6671.
  15. Pinto, D., Delaby, E., Merico, D., Barbosa, M., Merikangas, A., Klei, L., Thiruvahindrapuram, B., Xu, X., Ziman, R., Wang, Z., et al. (2014). Convergence of genes and cellular pathways dysregulated in autism spectrum disorders. *Am. J. Hum. Genet.* 94, 677–694.
  16. Liakath-Ali, K., Vancollie, V.E., Heath, E., Smedley, D.P., Estabel, J., Sunter, D., Ditommaso, T., White, J.K., Ramirez-Solis, R., Smyth, I., et al. (2014). Novel skin phenotypes revealed by a genome-wide mouse reverse genetic screen. *Nat. Commun.* 5, 3540.
  17. Renkema, K.Y., Stokman, M.F., Giles, R.H., and Knoers, N.V. (2014). Next-generation sequencing for research and diagnostics in kidney disease. *Nat. Rev. Nephrol.* 10, 433–444.
  18. Sana, M.E., Spitaleri, A., Spiliotopoulos, D., Pezzoli, L., Preda, L., Musco, G., Ferrazzi, P., and Iacone, M. (2014). Identification of a novel de novo deletion in RAF1 associated with biventricular hypertrophy in Noonan syndrome. *Am. J. Med. Genet. A.* 164A, 2069–2073.
  19. Amberger, J.S., Bocchini, C.A., Schiettecatte, F., Scott, A.F., and Hamosh, A. (2015). OMIM.org: Online Mendelian Inheritance in Man (OMIM®), an online catalog of human genes and genetic disorders. *Nucleic Acids Res.* 43, 789–798.
  20. Kibbe, W.A., Arze, C., Felix, V., Mitraka, E., Bolton, E., Fu, G., Mungall, C.J., Binder, J.X., Malone, J., Vasant, D., et al. (2015). Disease Ontology 2015 update: an expanded and updated database of human diseases for linking biomedical knowledge through disease data. *Nucleic Acids Res.* 43, D1071–D1078.
  21. Petrovski, S., and Goldstein, D.B. (2014). Phenomics and the interpretation of personal genomes. *Sci Transl Med.* 6, 254fs35.
  22. Wright, C.F., Fitzgerald, T.W., Jones, W.D., Clayton, S., McRae, J.F., van Kogelenberg, M., King, D.A., Ambridge, K., Barrett, D.M., Bayzina, T., et al.; DDD study (2015). Genetic diagnosis of developmental disorders in the DDD study: a scalable analysis of genome-wide research data. *Lancet* 385, 1305–1314.
  23. Robinson, P.N., and Webber, C. (2014). Phenotype ontologies and cross-species analysis for translational research. *PLoS Genet.* 10, e1004268.
  24. Washington, N.L., Haendel, M.A., Mungall, C.J., Ashburner, M., Westerfield, M., and Lewis, S.E. (2009). Linking human diseases to animal models using ontology-based phenotype annotation. *PLoS Biol.* 7, e1000247.
  25. Mungall, C.J., Gkoutos, G.V., Smith, C.L., Haendel, M.A., Lewis, S.E., and Ashburner, M. (2010). Integrating phenotype ontologies across multiple species. *Genome Biol.* 11, R2.
  26. Haendel, M.A., Balhoff, J.P., Bastian, F.B., Blackburn, D.C., Blake, J.A., Bradford, Y., Comte, A., Dahdul, W.M., Dececchi, T.A., Druzinsky, R.E., et al. (2014). Unification of multi-species vertebrate anatomy ontologies for comparative biology in Uberon. *J Biomed Semantics* 5, 21.
  27. Hastings, J., de Matos, P., Dekker, A., Ennis, M., Harsha, B., Kale, N., Muthukrishnan, V., Owen, G., Turner, S., Williams, M., and Steinbeck, C. (2013). The ChEBI reference database and ontology for biologically relevant chemistry: enhancements for 2013. *Nucleic Acids Res.* 41, D456–D463.
  28. Smedley, D., Oellrich, A., Köhler, S., Ruef, B., Westerfield, M., Robinson, P., Lewis, S., and Mungall, C.; Sanger Mouse Genetics Project (2013). PhenoDigm: analyzing curated annotations to associate animal models with human diseases. *Database (Oxford)* 2013, bat025.
  29. Köhler, S., Doelken, S.C., Ruef, B.J., Bauer, S., Washington, N., Westerfield, M., Gkoutos, G., Schofield, P., Smedley, D., Lewis, S.E., et al. (2013). Construction and accessibility of a cross-species phenotype ontology along with gene annotations for biomedical research. *F1000Res.* 2, 30.
  30. Köhler, S., Bauer, S., Mungall, C.J., Carletti, G., Smith, C.L., Schofield, P., Gkoutos, G.V., and Robinson, P.N. (2011). Improving ontologies by automatic reasoning and evaluation of logical definitions. *BMC Bioinformatics* 12, 418.
  31. Bragin, E., Chatzimichali, E.A., Wright, C.F., Hurles, M.E., Firth, H.V., Bevan, A.P., and Swaminathan, G.J. (2014). DECIPHER: database for the interpretation of phenotype-linked plausibly pathogenic sequence and copy-number variation. *Nucleic Acids Res.* 42, D993–D1000.
  32. Vulto-van Silfhout, A.T., van Ravenswaaij, C.M., Hehir-Kwa, J.Y., Verwiel, E.T., Dirks, R., van Vooren, S., Schinzel, A., de Vries, B.B., and de Leeuw, N. (2013). An update on ECARUCA, the European Cytogeneticists Association Register of Unbalanced Chromosome Aberrations. *Eur. J. Med. Genet.* 56, 471–474.
  33. Beck, T., Hastings, R.K., Gollapudi, S., Free, R.C., and Brookes, A.J. (2014). GWAS Central: a comprehensive resource for the comparison and interrogation of genome-wide association studies. *Eur. J. Hum. Genet.* 22, 949–952.
  34. Li, M.J., Wang, P., Liu, X., Lim, E.L., Wang, Z., Yeager, M., Wong, M.P., Sham, P.C., Chanock, S.J., and Wang, J. (2012). GWASdb: a database for human genetic variants identified by genome-wide association studies. *Nucleic Acids Res.* 40, D1047–D1054.
  35. Welter, D., MacArthur, J., Morales, J., Burdett, T., Hall, P., Junkins, H., Klemm, A., Flicek, P., Manolio, T., Hindorf, L., and Parkinson, H. (2014). The NHGRI GWAS Catalog, a curated resource of SNP-trait associations. *Nucleic Acids Res.* 42, D1001–D1006.
  36. Biesecker, L.G., and Green, R.C. (2014). Diagnostic clinical genome and exome sequencing. *N. Engl. J. Med.* 370, 2418–2425.
  37. Chen, Y.C., Douville, C., Wang, C., Niknafs, N., Yeo, G., Beleva-Guthrie, V., Carter, H., Stenson, P.D., Cooper, D.N., Li, B., et al. (2014). A probabilistic model to predict clinical phenotypic traits from genome sequencing. *PLoS Comput. Biol.* 10, e1003825.
  38. Jonquet, C., Shah, N.H., and Musen, M.A. (2009). The open biomedical annotator. *Summit on Translat Bioinforma 2009*, 56–60.
  39. Campos, D., Matos, S., and Oliveira, J.L. (2013). A modular framework for biomedical concept recognition. *BMC Bioinformatics* 14, 281.

40. Groza, T., Köhler, S., Doelken, S., Collier, N., Oellrich, A., Smedley, D., Couto, F.M., Baynam, G., Zankl, A., and Robinson, P.N. (2015). Automatic concept recognition using the human phenotype ontology reference and test suite corpora. Database (Oxford), 2015.
41. Robinson, P.N., and Bauer, S. (2011). Introduction to Biol-Ontologies (Baton Rouge: CRC Press Inc.).
42. Demchak, B., Hull, T., Reich, M., Liefeld, T., Smoot, M., Ideker, T., and Mesirov, J.P. (2014). Cytoscape: the network visualization tool for GenomeSpace workflows. *F1000Res.* 3, 151.
43. Maslov, S., and Sneppen, K. (2002). Specificity and stability in topology of protein networks. *Science* 296, 910–913.
44. Zhang, W., Gamazon, E.R., Zhang, X., Konkashbaev, A., Liu, C., Szilágyi, K.L., Dolan, M.E., and Cox, N.J. (2015). SCAN database: facilitating integrative analyses of cytosine modification and expression QTL. Database (Oxford), 2015.
45. Schriml, L.M., Arze, C., Nadendla, S., Chang, Y.W., Mazaitis, M., Felix, V., Feng, G., and Kibbe, W.A. (2012). Disease Ontology: a backbone for disease semantic integration. *Nucleic Acids Res.* 40, D940–D946.
46. Ripke, S., O'Dushlaine, C., Chambert, K., Moran, J.L., Kähler, A.K., Akterin, S., Bergen, S.E., Collins, A.L., Crowley, J.J., Fromer, M., et al.; Multicenter Genetic Studies of Schizophrenia Consortium; Psychosis Endophenotypes International Consortium; Wellcome Trust Case Control Consortium 2 (2013). Genome-wide association analysis identifies 13 new risk loci for schizophrenia. *Nat. Genet.* 45, 1150–1159.
47. Stranger, B.E., Stahl, E.A., and Raj, T. (2011). Progress and promise of genome-wide association studies for human complex trait genetics. *Genetics* 187, 367–383.
48. Doecke, J.D., Simms, L.A., Zhao, Z.Z., Huang, N., Hanigan, K., Krishnaprasad, K., Roberts, R.L., Andrews, J.M., Mahy, G., Bampton, P., et al. (2013). Genetic susceptibility in IBD: overlap between ulcerative colitis and Crohn's disease. *Inflamm. Bowel Dis.* 19, 240–245.
49. Cross-Disorder Group of the Psychiatric Genomics Consortium (2013). Identification of risk loci with shared effects on five major psychiatric disorders: a genome-wide analysis. *Lancet* 381, 1371–1379.
50. Richard-Miceli, C., and Criswell, L.A. (2012). Emerging patterns of genetic overlap across autoimmune disorders. *Genome Med.* 4, 6.
51. Li, Y., Zhang, K., Chen, H., Sun, F., Xu, J., Wu, Z., Li, P., Zhang, L., Du, Y., Luan, H., et al. (2013). A genome-wide association study in Han Chinese identifies a susceptibility locus for primary Sjögren's syndrome at 7q11.23. *Nat. Genet.* 45, 1361–1365.
52. Graham, R.R., Cotsapas, C., Davies, L., Hackett, R., Lessard, C.J., Leon, J.M., Burt, N.P., Guiducci, C., Parkin, M., Gates, C., et al. (2008). Genetic variants near TNFAIP3 on 6q23 are associated with systemic lupus erythematosus. *Nat. Genet.* 40, 1059–1061.
53. Zhou, X., Menche, J., Barabási, A.L., and Sharma, A. (2014). Human symptoms-disease network. *Nat. Commun.* 5, 4212.
54. Blair, D.R., Lyttle, C.S., Mortensen, J.M., Bearden, C.F., Jensen, A.B., Khiabani, H., Melamed, R., Rabadan, R., Bernstam, E.V., Brunak, S., et al. (2013). A nondegenerate code of deleterious variants in Mendelian loci contributes to complex disease risk. *Cell* 155, 70–80.
55. Alzheimer's Disease Collaborative Group (1995). The structure of the presenilin 1 (S182) gene and identification of six novel mutations in early onset AD families. *Nat. Genet.* 11, 219–222.
56. Lambert, J.C., Mann, D.M., Harris, J.M., Chartier-Harlin, M.C., Cumming, A., Coates, J., Lemmon, H., StClair, D., Iwatsubo, T., and Lendon, C. (2001). The -48 C/T polymorphism in the presenilin 1 promoter is associated with an increased risk of developing Alzheimer's disease and an increased Abeta load in brain. *J. Med. Genet.* 38, 353–355.
57. Kathiresan, S., Willer, C.J., Peloso, G.M., Demissie, S., Musunuru, K., Schadt, E.E., Kaplan, L., Bennett, D., Li, Y., Tanaka, T., et al. (2009). Common variants at 30 loci contribute to polygenic dyslipidemia. *Nat. Genet.* 41, 56–65.
58. Lusi, A.J., and Pajukanta, P. (2008). A treasure trove for lipo-protein biology. *Nat. Genet.* 40, 129–130.
59. Stahl, E.A., Raychaudhuri, S., Remmers, E.F., Xie, G., Eyre, S., Thomson, B.P., Li, Y., Kurzeeman, F.A., Zernakova, A., Hinks, A., et al.; BIRAC Consortium; YEAR Consortium (2010). Genome-wide association study meta-analysis identifies seven new rheumatoid arthritis risk loci. *Nat. Genet.* 42, 508–514.
60. Shi, Y., Zhao, H., Shi, Y., Cao, Y., Yang, D., Li, Z., Zhang, B., Liang, X., Li, T., Chen, J., et al. (2012). Genome-wide association study identifies eight new risk loci for polycystic ovary syndrome. *Nat. Genet.* 44, 1020–1025.
61. Voight, B.F., Scott, L.J., Steinthorsdottir, V., Morris, A.P., Dina, C., Welch, R.P., Zeggini, E., Huth, C., Aulchenko, Y.S., Thorleifsson, G., et al.; MAGIC investigators; GIANT Consortium (2010). Twelve type 2 diabetes susceptibility loci identified through large-scale association analysis. *Nat. Genet.* 42, 579–589.
62. Kraja, A.T., Vaidya, D., Pankow, J.S., Goodarzi, M.O., Assimes, T.L., Kullo, I.J., Sovio, U., Mathias, R.A., Sun, Y.V., Franceschini, N., et al. (2011). A bivariate genome-wide approach to metabolic syndrome: STAMPEED consortium. *Diabetes* 60, 1329–1339.
63. Lill, C.M., Roehr, J.T., McQueen, M.B., Kavvoura, F.K., Bagade, S., Schjeide, B.M., Schjeide, L.M., Meissner, E., Zauft, U., Allen, N.C., et al.; 23andMe Genetic Epidemiology of Parkinson's Disease Consortium; International Parkinson's Disease Genomics Consortium; Parkinson's Disease GWAS Consortium; Wellcome Trust Case Control Consortium 2 (2012). Comprehensive research synopsis and systematic meta-analyses in Parkinson's disease genetics: The PDGene database. *PLoS Genet.* 8, e1002548.
64. Kim, D.K., Cho, M.H., Hersh, C.P., Lomas, D.A., Miller, B.E., Kong, X., Bakke, P., Gulsvik, A., Agustí, A., Wouters, E., et al.; ECLIPSE, ICGN, and COPDGene Investigators (2012). Genome-wide association analysis of blood biomarkers in chronic obstructive pulmonary disease. *Am. J. Respir. Crit. Care Med.* 186, 1238–1247.
65. Amberger, J., Bocchini, C., and Hamosh, A. (2011). A new face and new challenges for Online Mendelian Inheritance in Man (OMIM®). *Hum. Mutat.* 32, 564–567.
66. Rath, A., Olry, A., Dhombres, F., Brandt, M.M., Urbero, B., and Ayme, S. (2012). Representation of rare diseases in health information systems: the Orphanet approach to serve a wide range of end users. *Hum. Mutat.* 33, 803–808.
67. Oti, M., and Brunner, H.G. (2007). The modular nature of genetic diseases. *Clin. Genet.* 71, 1–11.
68. Barabási, A.L. (2007). Network medicine—from obesity to the “diseasome”. *N. Engl. J. Med.* 357, 404–407.
69. Feldman, I., Rzhetsky, A., and Vitkup, D. (2008). Network properties of genes harboring inherited disease mutations. *Proc. Natl. Acad. Sci. USA* 105, 4323–4328.
70. Vidal, M., Cusick, M.E., and Barabási, A.L. (2011). Interactome networks and human disease. *Cell* 144, 986–998.

71. Dewey, F.E., Grove, M.E., Pan, C., Goldstein, B.A., Bernstein, J.A., Chaib, H., Merker, J.D., Goldfeder, R.L., Enns, G.M., David, S.P., et al. (2014). Clinical interpretation and implications of whole-genome sequencing. *JAMA* *311*, 1035–1045.
72. Hennekam, R.C., and Biesecker, L.G. (2012). Next-generation sequencing demands next-generation phenotyping. *Hum. Mutat.* *33*, 884–886.
73. Esplin, E.D., Oei, L., and Snyder, M.P. (2014). Personalized sequencing and the future of medicine: discovery, diagnosis and defeat of disease. *Pharmacogenomics* *15*, 1771–1790.
74. Voros, S., Maurovich-Horvat, P., Marvasty, I.B., Bansal, A.T., Barnes, M.R., Vazquez, G., Murray, S.S., Voros, V., Merkely, B., Brown, B.O., and Warnick, G.R. (2014). Precision phenotyping, panomics, and system-level bioinformatics to delineate complex biologies of atherosclerosis: rationale and design of the “Genetic Loci and the Burden of Atherosclerotic Lesions” study. *J. Cardiovasc. Comput. Tomogr.* *8*, 442–451.
75. Ball, M.P., Thakuria, J.V., Zaranek, A.W., Clegg, T., Rosenbaum, A.M., Wu, X., Angrist, M., Bhak, J., Bobe, J., Callow, M.J., et al. (2012). A public resource facilitating clinical use of genomes. *Proc. Natl. Acad. Sci. USA* *109*, 11920–11927.
76. Saunders, C.J., Miller, N.A., Soden, S.E., Dinwiddie, D.L., Noll, A., Alnadi, N.A., Andraws, N., Patterson, M.L., Krivohlavek, L.A., Fellis, J., et al. (2012). Rapid whole-genome sequencing for genetic disease diagnosis in neonatal intensive care units. *Sci Transl Med.* *4*, 154ra135.
77. Bell, C.J., Dinwiddie, D.L., Miller, N.A., Hateley, S.L., Ganusova, E.E., Mudge, J., Langley, R.J., Zhang, L., Lee, C.C., Schilkey, F.D., et al. (2011). Carrier testing for severe childhood recessive diseases by next-generation sequencing. *Sci. Transl. Med.* *3*, ra4.
78. Ellinor, P.T., Lunetta, K.L., Albert, C.M., Glazer, N.L., Ritchie, M.D., Smith, A.V., Arking, D.E., Müller-Nurasyid, M., Krijthe, B.P., Lubitz, S.A., et al. (2012). Meta-analysis identifies six new susceptibility loci for atrial fibrillation. *Nat. Genet.* *44*, 670–675.
79. Tsai, C.T., Hsieh, C.S., Chang, S.N., Chuang, E.Y., Juang, J.M., Lin, L.Y., Lai, L.P., Hwang, J.J., Chiang, F.T., and Lin, J.L. (2015). Next-generation sequencing of nine atrial fibrillation candidate genes identified novel de novo mutations in patients with extreme trait of atrial fibrillation. *J. Med. Genet.* *52*, 28–36.
80. Kohane, I.S. (2011). Using electronic health records to drive discovery in disease genomics. *Nat. Rev. Genet.* *12*, 417–428.
81. Denny, J.C., Bastarache, L., Ritchie, M.D., Carroll, R.J., Zink, R., Mosley, J.D., Field, J.R., Pulley, J.M., Ramirez, A.H., Bowton, E., et al. (2013). Systematic comparison of phenome-wide association study of electronic medical record data and genome-wide association study data. *Nat. Biotechnol.* *31*, 1102–1110.
82. Denny, J.C., Ritchie, M.D., Basford, M.A., Pulley, J.M., Bastarache, L., Brown-Gentry, K., Wang, D., Masys, D.R., Roden, D.M., and Crawford, D.C. (2010). PheWAS: demonstrating the feasibility of a phenome-wide scan to discover gene-disease associations. *Bioinformatics* *26*, 1205–1210.
83. Tatonetti, N.P., Denny, J.C., Murphy, S.N., Fernald, G.H., Krishnan, G., Castro, V., Yue, P., Tsao, P.S., Kohane, I., Roden, D.M., and Altman, R.B. (2011). Detecting drug interactions from adverse-event reports: interaction between paroxetine and pravastatin increases blood glucose levels. *Clin. Pharmacol. Ther.* *90*, 133–142.
84. Batet, M., Sánchez, D., and Valls, A. (2011). An ontology-based measure to compute semantic similarity in biomedicine. *J. Biomed. Inform.* *44*, 118–125.
85. Pesquita, C., Faria, D., Falcão, A.O., Lord, P., and Couto, F.M. (2009). Semantic similarity in biomedical ontologies. *PLoS Comput. Biol.* *5*, e1000443.

The American Journal of Human Genetics

Supplemental Data

## **The Human Phenotype Ontology:**

### **Semantic Unification of Common and Rare Disease**

**Tudor Groza, Sebastian Köhler, Dawid Moldenhauer, Nicole Vasilevsky, Gareth Baynam, Tomasz Zemojtel, Lynn Marie Schriml, Warren Alden Kibbe, Paul N. Schofield, Tim Beck, Drashti Vasant, Anthony J. Brookes, Andreas Zankl, Nicole L. Washington, Christopher J. Mungall, Suzanna E. Lewis, Melissa A. Haendel, Helen Parkinson, and Peter N. Robinson**

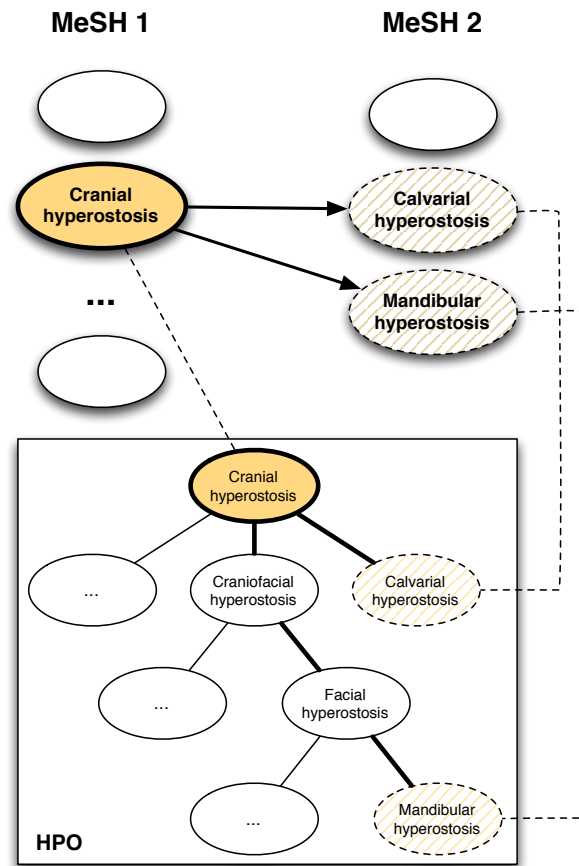

**Figure S1. Adapted Jaccard measure.** Example of using the HPO structure to compute the Jaccard index between the annotations of two different MeSH disorders. The standard Jaccard index is computed based on the assumption that the underlying data is represented as sets of symbolic elements. As a result, the index computes the ratio between the strict intersection and union of these elements. As opposed to symbolic elements, ontological concepts have the advantage of being structured in a logical hierarchy. This enables us to use the existing subsumption relation to quantify the degree of similarity between concepts, for example, by looking the path they share. This intrinsic similarity can also be exploited when computing the Jaccard index. Instead of performing the strict intersection and union of two sets of concepts, we considered a match also when two concepts share lineage – i.e., when one concept is an ancestor of the second. Such an example is presented in this figure, where *Cranial hyperostosis* is a parent of *Calvarial hyperostosis* and an ancestor of *Mandibular hyperostosis*, which leads to *Cranial hyperostosis* being the common ground for intersection between the two phenotype lists associated with MeSH 1 and MeSH 2.



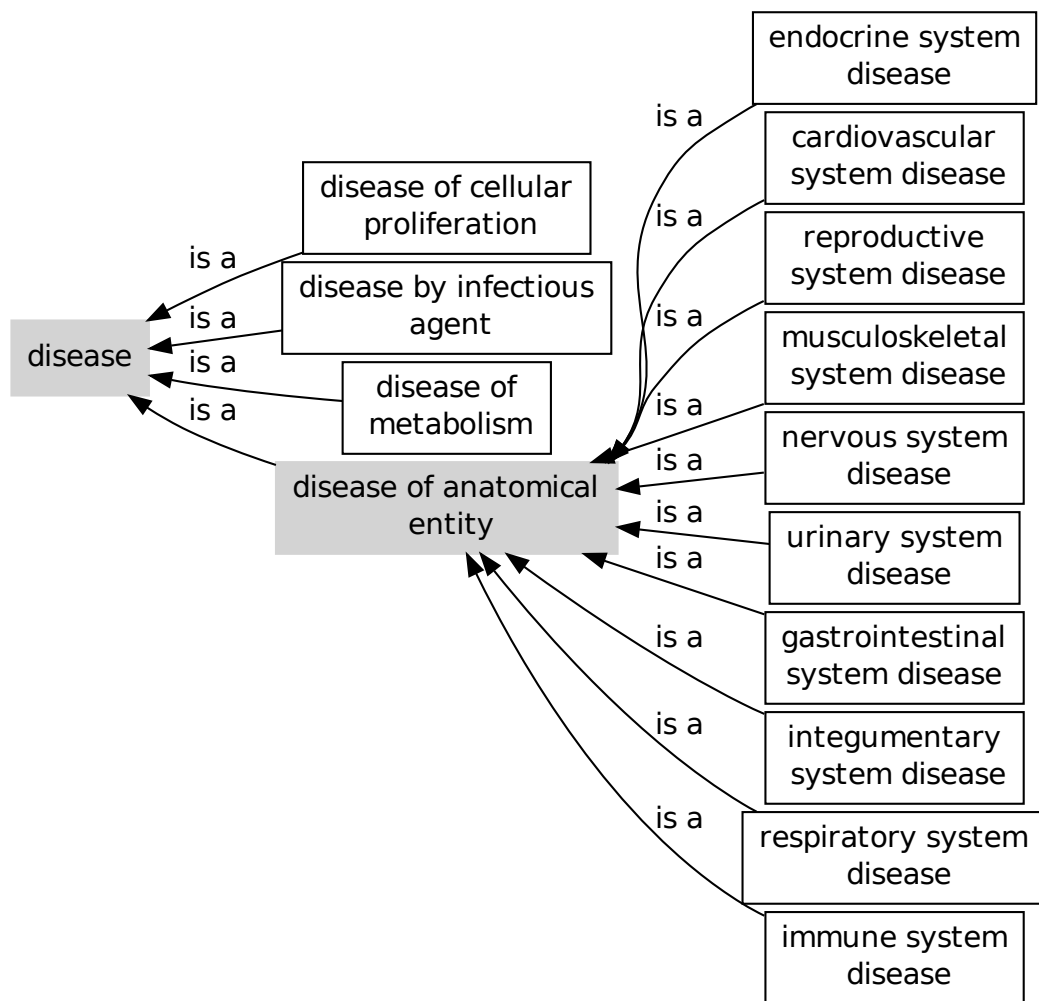

**Figure S2. Disease Ontology Classes used for Clustering Common Disease.** We chose 13 classes from the Disease Ontology [1] that represented standard categories used in internal medicine. Some class were excluded because they contained too few diseases (e.g., *thoracic disease*, n=13 diseases), or because they contained rare diseases (genetic disease or syndrome). The general classes “disease” and “disease of anatomical entity” (shown in light gray) were not included in the analysis.

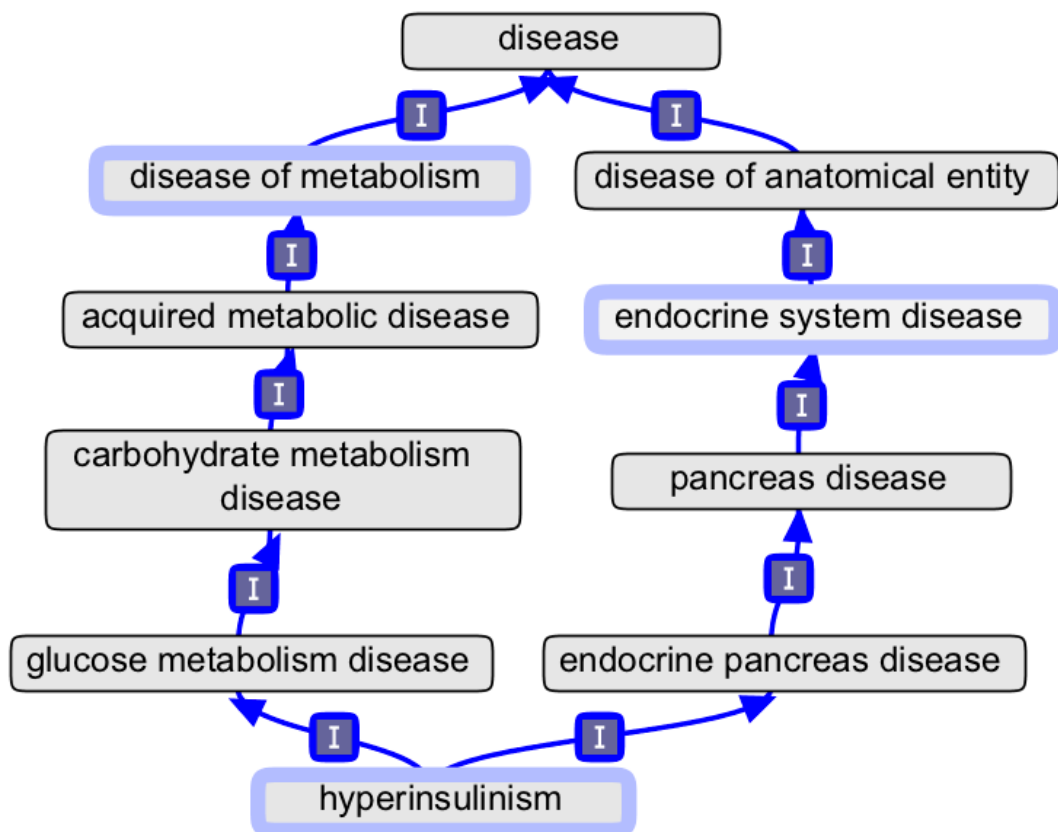

**Figure S3. Diseases belonging to multiple Disease Ontology Classes.** In some cases, individual diseases belong to more than one category. For instance, and as shown here, Hyperinsulinism is categorized as “disease of metabolism” and “endocrine system disease”.

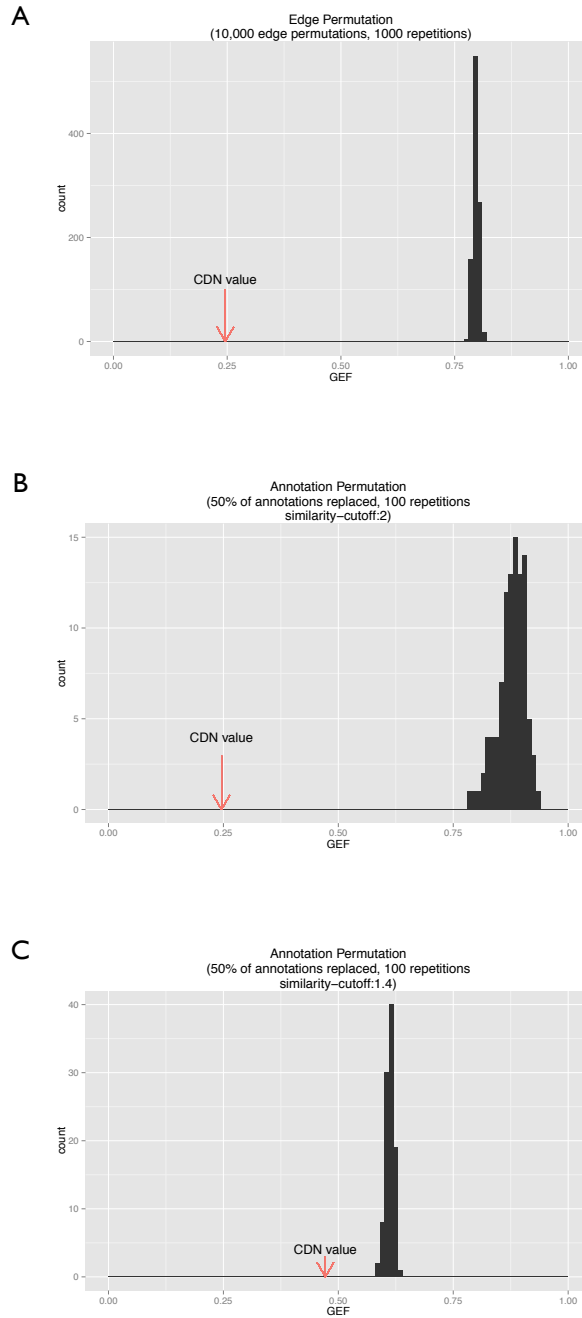

**Figure S4. Grey edge fraction analysis of the CDN.** Histograms of the *grey edge fraction* (GEF) values obtained by randomizations of the CDN. The red arrows show the GEF value of the original CDN. **(A)** Edge-randomized version of the original CDN (CDN-*o*) in which edges between diseases were randomly shuffled 10,000 times (CDN-*er*). Not one of the randomized networks achieved as good a result as the value for CDN-*o* (empirical  $p$  value  $< 10^{-4}$ ). **(B)** Annotation-randomized version of CDN-*o* in which 50% of the annotations were replaced by random annotations (threshold similarity value  $simcut = 2.0$ ). **(C)** Similar to (B) but with threshold similarity value  $simcut = 1.4$ . In both simulations, not a single randomized network performed as well as the observed network, corresponding to an empirical  $p$  value of  $p < 0.01$ .

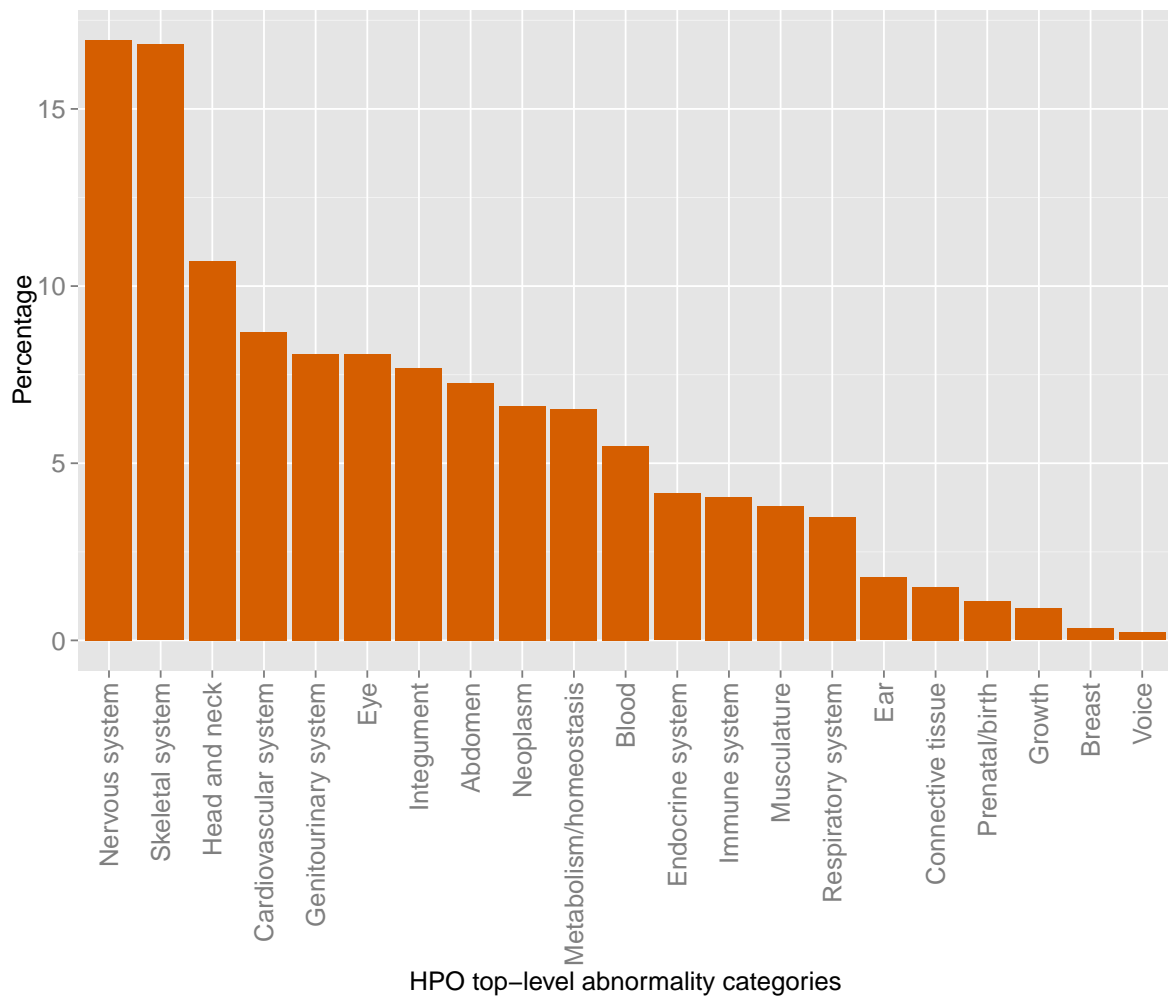

**Figure S5. Distribution of top-level HPO Annotations among common diseases.** The distribution of extracted HPO annotations according to the top level HPO concepts in the list of common MeSH disorders.

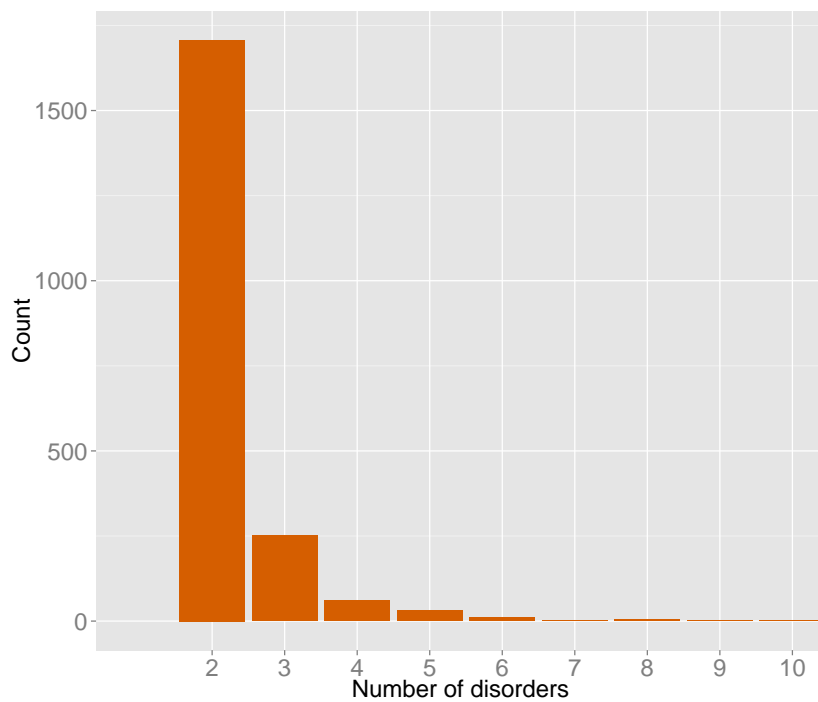

**Figure S6. SNP Sharing.** The figure shows the overall number of SNPs that are associated with multiple common diseases (among all 3145 common diseases examined in this project). Thus, the great majority of SNPs that are associated with multiple diseases are shared by a pair of diseases, but several hundred different SNPs are shared by three diseases, and so on. This analysis was based on a total of 16,152 SNPs listed in the GWAS Central database. Of these, 15,289 were associated with only a single disease. SNPs that were associated with two or more diseases are included in the bar chart shown in this Figure.

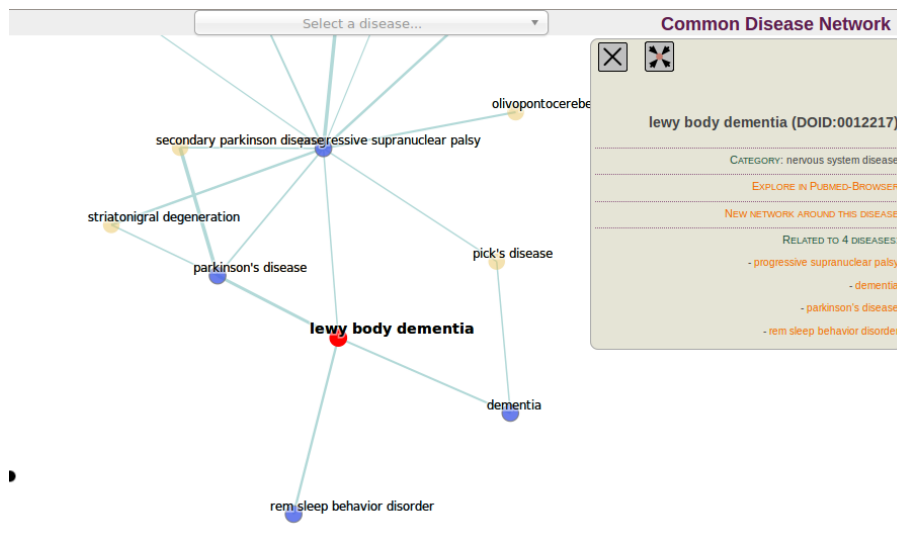

**Figure S7. Common Disease Network (CDN) browser.** Users can navigate throughout the network of common diseases that are interconnected by phenotypic similarity. To get to this page, enter the name of a disease (e.g., “Lewy body disease” into the search field at <http://pubmed-browser.human-phenotype-ontology.org/>, and choose the corresponding MeSH disease entry. The server will return a page entitled “Search Results” with a number of items. The disease page for “Lewy body disease” can now be reached via the link near the top of the Search Results page (the link next to the stethoscope symbol). This page, located at <http://pubmed-browser.human-phenotype-ontology.org/#/mesh/D020961>, contains a link “View Disease Network”, that will open up the view shown in this Figure. Clicking on any of the nodes in the network will open up a window with additional information.

**Table S1.** Overview of HPO annotations for **Giant Cell Arteritis** that were derived by concept recognition in PubMed using BioLark. There were 68 true positives, 38 false positives, and 79 false negatives.

| ID         | Name                                    | pmid                 | status | ID         | Name                             | pmid                | status |
|------------|-----------------------------------------|----------------------|--------|------------|----------------------------------|---------------------|--------|
| HP:0002633 | Vasculitis                              | 3160017              | TP     | HP:0002331 | Headache (with pheochromocytoma) |                     | FP     |
| HP:0000572 | Visual loss                             | 10387327             | TP     | HP:0001138 | Optic neuropathy                 | 10387327            | TP     |
| HP:0003565 | Elevated erythrocyte sedimentation rate | 23795218             | TP     | HP:0001945 | Fever                            | 7242167             | TP     |
| HP:0005310 | Large vessel vasculitis                 | 7081559<br>15604899  | TP     | HP:0001824 | Weight loss                      | 21953306            | TP     |
| HP:0001297 | Stroke                                  | 18640460             | TP     | HP:0002955 | Granulomatosis                   |                     | FP     |
| HP:0001370 | Rheumatoid arthritis                    |                      | FP     | HP:0000651 | Diplopia                         | 22119350            | TP     |
| HP:0001903 | Anemia                                  |                      | FP     | HP:0003326 | Myalgia                          | 6199905             | TP     |
| HP:0100576 | Amaurosis fugax                         | 9433866              | TP     | HP:0002617 | Aneurysm                         | 18634260            | TP     |
| HP:0004942 | Aortic aneurysm                         | 18021519             | TP     | HP:0002315 | Headache                         | 15384038            | TP     |
| HP:0003453 | Antineutrophil antibody positivity      |                      | FP     | HP:0100545 | Arterial stenosis                | 22119350            | TP     |
| HP:0000969 | Edema                                   |                      | FP     | HP:0000822 | Hypertension                     |                     | FP     |
| HP:0002621 | Atherosclerosis                         |                      | FP     | HP:0001369 | Arthritis                        | 2652937<br>2068658  | TP     |
| HP:0002622 | Dissecting aortic aneurysm              | 16766372             | TP     | HP:0009742 | Stiff shoulders                  | 23795218            | TP     |
| HP:0002725 | Systemic lupus erythematosus            |                      | FP     | HP:0002039 | Anorexia                         | 7242167<br>21953306 | TP     |
| HP:0001659 | Aortic regurgitation                    | 16829112             | TP     | HP:0100769 | Synovitis                        | 18640460<br>9448986 | TP     |
| HP:0001324 | Muscle weakness                         | 12861494             | TP     | HP:0000939 | Osteoporosis                     |                     | FP     |
| HP:0002076 | Migraine                                | 955413<br>9747046    | TP     | HP:0011944 | Small vessel vasculitis          | 21953306            | TP     |
| HP:0001894 | Thrombocytosis                          | 16543040<br>9222239  | TP     | HP:0011034 | Amyloidosis                      | 1128873             | TP     |
| HP:0009830 | Peripheral neuropathy                   |                      | FP     | HP:0001658 | Myocardial infarction            | 17546258            | TP     |
| HP:0100758 | Gangrene                                | 16344614             | TP     | HP:0004417 | Intermittent claudication        | 11409140            | TP     |
| HP:0002634 | Arteriosclerosis                        | 1078327              | TP     | HP:0003365 | Arthralgia of the hip            | 9458228             | TP     |
| HP:0001880 | Eosinophilia                            |                      | FP     | HP:0000505 | Visual impairment                | 9747046             | TP     |
| HP:0002647 | Aortic dissection                       | 16845847             | TP     | HP:0001289 | Confusion                        |                     | FP     |
| HP:0100546 | Carotid artery stenosis                 | 10458090             | TP     | HP:0001123 | Visual field defect              | 1243233             | TP     |
| HP:0009831 | Mononeuropathy                          | 2996347              | TP     | HP:0100661 | Trigeminal neuralgia             |                     | FP     |
| HP:0003155 | Elevated alkaline phosphatase           | 1790639              | TP     | HP:0000718 | Aggressive behavior              |                     | FP     |
| HP:0002090 | Pneumonia                               |                      | FP     | HP:0002326 | Transient ischemic attack        | 3347337             | TP     |
| HP:0000622 | Blurred vision                          | 18052956             | TP     | HP:0004420 | Arterial thrombosis              | 17546258            | TP     |
| HP:0000602 | Ophthalmoplegia                         | 1807820              | TP     | HP:0000819 | Diabetes mellitus                |                     | FP     |
| HP:0001287 | Meningitis                              |                      | FP     | HP:0000648 | Optic atrophy                    | 7222706             | TP     |
| HP:0002631 | Ascending aortic aneurysm               | 17310805             | TP     | HP:0003470 | Paralysis                        |                     | FP     |
| HP:0000726 | Dementia                                | 1766283              | TP     | HP:0000501 | Glaucoma                         |                     | FP     |
| HP:0003552 | Muscle stiffness                        | 1807819              | TP     | HP:0100653 | Optic neuritis                   | 8523347             | TP     |
| HP:0007686 | Abnormal pupillary function             | 19733885<br>15590540 | TP     | HP:0000979 | Purpura                          |                     | FP     |
| HP:0011134 | Low-grade fever                         | 17180298             | TP     | HP:0000518 | Cataract                         |                     | FP     |

*continued on the next page*

Table S1. Giant Cell Arteritis – continued

| ID         | Name                              | pmid                 | status | ID         | Name                                 | pmid                 | status |
|------------|-----------------------------------|----------------------|--------|------------|--------------------------------------|----------------------|--------|
| HP:0100324 | Scleroderma                       |                      | FP     | HP:0007354 | Amyotrophic lateral sclerosis        |                      | FP     |
| HP:0005294 | Arterial dissection               |                      | FP     | HP:0000529 | Progressive visual loss              | 17504884             | TP     |
| HP:0003881 | Humeral sclerosis                 |                      | FP     | HP:0000100 | Nephrotic syndrome                   | 9058675              | TP     |
| HP:0011227 | Elevated C-reactive protein level | 23795218             | TP     | HP:0003207 | Arterial calcification               | 9196863              | TP     |
| HP:0004950 | Peripheral arterial disease       | 12835863<br>15710711 | TP     | HP:0000246 | Sinusitis                            |                      | FP     |
| HP:0006824 | Cranial nerve paralysis           | 22802376<br>6297074  | TP     | HP:0100749 | Chest pain                           | 16829112             | TP     |
| HP:0001269 | Hemiparesis                       | 12143952             | TP     | HP:0001271 | Polyneuropathy                       | 1402990              | TP     |
| HP:0100646 | Thyroiditis                       |                      | FP     | HP:0000365 | Hearing impairment                   | 20233486             | TP     |
| HP:0002910 | Elevated hepatic transaminases    | 7263904              | TP     | HP:0008653 | Crescentic glomerulonephritis        | 12200821             | TP     |
| HP:0000820 | Abnormality of the thyroid gland  |                      | FP     | HP:0002829 | Arthralgia                           | 21627866             | TP     |
| HP:0001609 | Hoarse voice                      | 7863116              | TP     | HP:0002140 | Ischemic stroke                      | 20609853             | TP     |
| HP:0002758 | Osteoarthritis                    |                      | FP     | HP:0001997 | Gout                                 |                      | FP     |
| HP:0000821 | Hypothyroidism                    | 1913003<br>8094625   | TP     | HP:0011510 | Drusen                               | 10150824             | TP     |
| HP:0000639 | Nystagmus                         | 2765284              | TP     | HP:0001145 | Chorioretinopathy                    |                      | FP     |
| HP:0000836 | Hyperthyroidism                   |                      | FP     | HP:0005113 | Dilatation of the aortic arch        |                      | FP     |
| HP:0100026 | Arteriovenous malformation        |                      | FP     | HP:0003095 | Septic arthritis                     |                      | FP     |
| HP:0005111 | Dilatation of the ascending aorta | -                    | TP     | HP:0004933 | Ascending aortic dissection          | 19049773<br>21521678 | TP     |
| HP:0005059 | arthralgia/arthritis              |                      | FP     | HP:0000495 | Recurrent corneal erosions           |                      | FP     |
| HP:0005318 | Cerebral vasculitis               | 8033943              | FN     | HP:0002616 | Aortic root dilatation               | 2209142<br>4030882   | FN     |
| HP:0001955 | Unexplained fevers                | 218291               | FN     | HP:0005200 | Retroperitoneal fibrosis             | 24885445             | FN     |
| HP:0002367 | Visual hallucinations             | 11550973             | FN     | HP:0001085 | Papilledema                          | 131544               | FN     |
| HP:0002301 | Hemiplegia                        | 501373               | FN     | HP:0001260 | Dysarthria                           | 9745245              | FN     |
| HP:0002113 | Pulmonary infiltrates             | 8777858<br>2052510   | FN     | HP:0009763 | Limb pain                            | 2655505              | FN     |
| HP:0000520 | Proptosis                         | 18052956             | FN     | HP:0003613 | Antiphospholipid antibody positivity | 11503135             | FN     |
| HP:0001701 | Pericarditis                      | 17335942             | FN     | HP:0001698 | Pericardial effusion                 | 17031245             | FN     |
| HP:0003401 | Paresthesia                       | 20609853             | FN     | HP:0000508 | Ptosis                               | 12143952             | FN     |
| HP:0004953 | Abdominal aortic aneurysm         | 13679546             | FN     | HP:0000554 | Uveitis                              | 17020003             | FN     |
| HP:0004944 | Cerebral aneurysm                 | 17961913             | FN     | HP:0001681 | Angina pectoris                      | 2759121              | FN     |
| HP:0003198 | Myopathy                          | 9739500              | FN     | HP:0001279 | Syncope                              | 6380900              | FN     |
| HP:0002138 | Subarachnoid hemorrhage           | 1990421              | FN     | HP:0002321 | Vertigo                              | 3230240              | FN     |
| HP:0100584 | Endocarditis                      | 16859594             | FN     | HP:0002202 | Pleural effusion                     | 20400261             | FN     |
| HP:0001724 | Aortic dilatation                 | 7361287              | FN     | HP:0001974 | Leukocytosis                         | 16148728             | FN     |
| HP:0001907 | Thromboembolism                   | 19811309             | FN     | HP:0003774 | Stage 5 chronic kidney disease       | 15384038<br>10620555 | FN     |
| HP:0002637 | Cerebral ischemia                 | 20626748             | FN     | HP:0002527 | Falls                                | 16859597             | FN     |
| HP:0001635 | Congestive heart failure          | 955413<br>17269602   | FN     | HP:0000083 | Renal insufficiency                  | 1489011              | FN     |
| HP:0002960 | Autoimmunity                      | 7581345              | FN     | HP:0000618 | Blindness                            | 21953306             | FN     |
| HP:0000716 | Depression                        | 1807819              | FN     | HP:0000543 | Optic disc pallor                    | 17020004             | FN     |

*continued on the next page*



Table S1. Giant Cell Arteritis – continued

| ID         | Name                            | pmid                 | status | ID         | Name                                 | pmid                 | status |
|------------|---------------------------------|----------------------|--------|------------|--------------------------------------|----------------------|--------|
| HP:0200029 | Vasculitis in the skin          | 14528512             | FN     | HP:0100534 | Episcleritis                         | 1012996              | FN     |
| HP:0000597 | Ophthalmoparesis                | 3057903              | FN     | HP:0001342 | Cerebral hemorrhage                  | 9385928              | FN     |
| HP:0006530 | Interstitial pulmonary disease  | 8745756              | FN     | HP:0010783 | Erythema                             | 3675013              | FN     |
| HP:0000093 | Proteinuria                     | 2729757              | FN     | HP:0002027 | Abdominal pain                       | 18204370             | FN     |
| HP:0100543 | Cognitive impairment            | 2330100              | FN     | HP:0100963 | Hyperesthesia                        | 19497602             | FN     |
| HP:0100704 | Cortical visual impairment      | 3057903              | FN     | HP:0100532 | Scleritis                            | 17020003             | FN     |
| HP:0001965 | Abnormality of the scalp        | 21953306<br>17476617 | FN     | HP:0000282 | Facial edema                         | 8689287              | FN     |
| HP:0002907 | Microscopic hematuria           | 11103864             | FN     | HP:0002344 | Progressive neurologic deterioration | 10578411<br>19592058 | FN     |
| HP:0010628 | Facial palsy                    | 10962818<br>9621267  | FN     | HP:0000541 | Retinal detachment                   | 21563451             | FN     |
| HP:0002015 | Dysphagia                       | 17509668             | FN     | HP:0001291 | Abnormality of the cranial nerves    | 9310116              | FN     |
| HP:0005291 | Inflammatory arteriopathy       | 20609853             | FN     | HP:0011353 | Arterial intimal fibrosis            | 1807817<br>11466252  | FN     |
| HP:0000206 | Glossitis                       | 3320647              | FN     | HP:0000603 | Central scotoma                      | 7800356              | FN     |
| HP:0001917 | Renal amyloidosis               | 9058675<br>11758014  | FN     | HP:0010532 | Paroxysmal vertigo                   | 15280720             | FN     |
| HP:0000211 | Trismus                         | 16859591             | FN     | HP:0003281 | Increased serum ferritin             | 16543040             | FN     |
| HP:0007863 | Retinal lesions                 | -                    | FN     | HP:0003324 | Generalized muscle weakness          | 17340046             | FN     |
| HP:0001605 | Vocal cord paralysis            | 16854506             | FN     | HP:0000573 | Retinal hemorrhage                   | 12692357<br>11130757 | FN     |
| HP:0002318 | Cervical myelopathy             | 9367971              | FN     | HP:0002102 | Pleuritis                            | 20400261             | FN     |
| HP:0000615 | Abnormality of the pupil        | 14552190             | FN     | HP:0000790 | Hematuria                            | 2729757              | FN     |
| HP:0002625 | Deep venous thrombosis          | 11503135             | FN     | HP:0001679 | Abnormality of the aorta             | -                    | FN     |
| HP:0005794 | Arterial disease of legs        | -                    | FN     | HP:0011477 | Upbeat nystagmus                     | 6703989              | FN     |
| HP:0003547 | Shoulder girdle muscle weakness | -                    | FN     |            |                                      |                      |        |

**Table S2.** Overview of HPO annotations for **Cholesterol Embolism** that were derived by concept recognition in PubMed using BioLark. There were 18 true positives, 27 false positives, and 34 false negatives.

| ID         | Name                              | pmid                 | status | ID         | Name                                | pmid                            | status |
|------------|-----------------------------------|----------------------|--------|------------|-------------------------------------|---------------------------------|--------|
| HP:0000965 | Cutis marmorata                   | 15240205<br>22588660 | TP     | HP:0001919 | Acute kidney injury                 | 21841332                        | TP     |
| HP:0002621 | Atherosclerosis                   |                      | FP     | HP:0000083 | Renal insufficiency                 | 11358047                        | TP     |
| HP:0001880 | Eosinophilia                      | 17726656             | TP     | HP:0000822 | Hypertension                        | 8541013                         | TP     |
| HP:0001658 | Myocardial infarction             |                      | FP     | HP:0003774 | Stage 5 chronic kidney disease      | 15705188                        | TP     |
| HP:0001297 | Stroke                            |                      | FP     | HP:0002633 | Vasculitis                          | 9217601                         | TP     |
| HP:0003259 | Elevated serum creatinine         | 17634712             | TP     | HP:0001920 | Renal artery stenosis               |                                 | FP     |
| HP:0000961 | Cyanosis                          |                      | FP     | HP:0004953 | Abdominal aortic aneurysm           |                                 | FP     |
| HP:0000093 | Proteinuria                       | 9404775              | TP     | HP:0004950 | Peripheral arterial disease         |                                 | FP     |
| HP:0003326 | Myalgia                           | 16940713             | TP     | HP:0002617 | Aneurysm                            |                                 | FP     |
| HP:0002140 | Ischemic stroke                   |                      | FP     | HP:0100546 | Carotid artery stenosis             |                                 | FP     |
| HP:0000112 | Nephropathy                       |                      | FP     | HP:0000819 | Diabetes mellitus                   |                                 | FP     |
| HP:0002027 | Abdominal pain                    | 12873565             | TP     | HP:0002239 | Gastrointestinal hemorrhage         | 9404775                         | TP     |
| HP:0001677 | Coronary artery disease           |                      | FP     | HP:0004942 | Aortic aneurysm                     |                                 | FP     |
| HP:0001907 | Thromboembolism                   |                      | FP     | HP:0000979 | Purpura                             | 17695780                        | TP     |
| HP:0002586 | Peritonitis                       |                      | FP     | HP:0001635 | Congestive heart failure            |                                 | FP     |
| HP:0003077 | Hyperlipidemia                    |                      | FP     | HP:0009763 | Limb pain                           | 17695780                        | TP     |
| HP:0005110 | Atrial fibrillation               |                      | FP     | HP:0002326 | Transient ischemic attack           | 11419038                        | TP     |
| HP:0009741 | Nephrosclerosis                   |                      | FP     | HP:0004417 | Intermittent claudication           |                                 | FP     |
| HP:0001945 | Fever                             | 15705188             | TP     | HP:0100598 | Pulmonary edema                     | 12238276                        | TP     |
| HP:0003124 | Hypercholesterolemia              |                      | FP     | HP:0002635 | Atheromatosis                       |                                 | FP     |
| HP:0002583 | Colitis                           | 8669792              | TP     | HP:0002634 | Arteriosclerosis                    |                                 | FP     |
| HP:0001888 | Lymphopenia                       |                      | FP     | HP:0004406 | Spontaneous recurrent epistaxis     |                                 | FP     |
| HP:0001899 | Increased hematocrit              |                      | FP     | HP:0100758 | Gangrene                            | 21841332                        | FN     |
| HP:0001082 | Cholecystitis                     | 10429867             | FN     | HP:0002014 | Diarrhea                            | 12873565                        | FN     |
| HP:0001733 | Pancreatitis                      | 9445132              | FN     | HP:0000790 | Hematuria                           | 16430035<br>11171470            | FN     |
| HP:0001735 | Acute pancreatitis                | 11100174             | FN     | HP:0001289 | Confusion                           | 18072326                        | FN     |
| HP:0001824 | Weight loss                       | 21993354             | FN     | HP:0100576 | Amaurosis fugax                     | 21993354                        | FN     |
| HP:0002573 | Hematochezia                      | 17277861<br>15494680 | FN     | HP:0000100 | Nephrotic syndrome                  | 9041208                         | FN     |
| HP:0002157 | Azotemia                          | 20453403             | FN     | HP:0000099 | Glomerulonephritis                  | 18651554<br>12324923<br>9041208 | FN     |
| HP:0001063 | Acrocyanosis                      | 7727880<br>9235104   | FN     | HP:0006846 | Acute encephalopathy                | 17229746                        | FN     |
| HP:0011227 | Elevated C-reactive protein level | 12875753             | FN     | HP:0008682 | Acute tubular necrosis              | 12649545                        | FN     |
| HP:0200042 | Skin ulcer                        | 21946763             | FN     | HP:0100614 | Myositis                            | 11394629                        | FN     |
| HP:0000096 | Glomerulosclerosis                | 16773802             | FN     | HP:0001269 | Hemiparesis                         | 12040986                        | FN     |
| HP:0010550 | Paraplegia                        | 15515703             | FN     | HP:0001324 | Muscle weakness                     | 8121874                         | FN     |
| HP:0004325 | Decreased body weight             | 21993354             | FN     | HP:0003138 | Increased blood urea nitrogen (BUN) | 18840042                        | FN     |
| HP:0004713 | Reversible renal failure          | 12187114             | FN     | HP:0007123 | Subcortical dementia                | 15465102                        | FN     |
| HP:0002913 | Myoglobinuria                     | 18480661             | FN     | HP:0003323 | Progressive muscle weakness         | 19774498                        | FN     |
| HP:0100732 | Pancreatic fibrosis               | 9445132              | FN     | HP:0002907 | Microscopic hematuria               | 22991843                        | FN     |

*continued on the next page*

**Table S2. Cholesterol Embolism – continued**

| <b>ID</b>  | <b>Name</b>                             | <b>pmid</b> | <b>status</b> | <b>ID</b>  | <b>Name</b>   | <b>pmid</b> | <b>status</b> |
|------------|-----------------------------------------|-------------|---------------|------------|---------------|-------------|---------------|
| HP:0003565 | Elevated erythrocyte sedimentation rate | 21993354    | FN            | HP:0100282 | Acute colitis | 7806835     | FN            |
| HP:0001974 | Leukocytosis                            | 21993354    | FN            |            |               |             |               |

**Table S3.** Overview of HPO annotations for **Postphlebitic Syndrome** that were derived by concept recognition in PubMed using BioLark. There were 14 true positives, 3 false positives, and 11 false negatives.

| ID         | Name                             | pmid     | status | ID         | Name                     | pmid               | status |
|------------|----------------------------------|----------|--------|------------|--------------------------|--------------------|--------|
| HP:0002625 | Deep venous thrombosis           | 25246013 | TP     | HP:0005293 | Venous insufficiency     | 25246013           | TP     |
| HP:0002204 | Pulmonary embolism               | 19741190 | TP     | HP:0004936 | Venous thrombosis        | 19741190           | TP     |
| HP:0000969 | Edema                            | 19741190 | TP     | HP:0002619 | Varicose veins           | 10886478           | TP     |
| HP:0004831 | Recurrent thromboembolism        | 16634738 | TP     | HP:0001907 | Thromboembolism          | 19741190           | TP     |
| HP:0200042 | Skin ulcer                       | 3209615  | TP     | HP:0001004 | Lymphedema               |                    | FP     |
| HP:0004325 | Decreased body weight            |          | FP     | HP:0004418 | Thrombophlebitis         | 9377251            | TP     |
| HP:0004419 | Recurrent thrombophlebitis       | 20870815 | TP     | HP:0002624 | Venous abnormality       | 3073400            | TP     |
| HP:0010834 | Trophic changes related to pain  | 10378331 | TP     | HP:0010741 | Edema of the lower limbs | 3275807            | TP     |
| HP:0100695 | Lipedema                         |          | FP     | HP:0003394 | Muscle cramps            | 8059211            | FN     |
| HP:0001000 | Abnormality of skin pigmentation | 19741190 | FN     | HP:0004947 | Arteriovenous fistula    | 1799229<br>1285578 | FN     |
| HP:0004417 | Intermittent claudication        | 1496032  | FN     | HP:0009763 | Limb pain                | 14693168           | FN     |
| HP:0000989 | Pruritus                         | 10886478 | FN     | HP:0001785 | Ankle swelling           | 2662673            | FN     |
| HP:0004850 | Recurrent deep vein thrombosis   | 10886478 | FN     | HP:0003401 | Paresthesia              | 2130425            | FN     |
| HP:0010783 | Erythema                         | 2695441  | FN     | HP:0001977 | Abnormal thrombosis      | -                  | FN     |

**Table S4.** Overview of HPO annotations for **Pernicious Anemia** that were derived by concept recognition in PubMed using BioLark. There were 17 true positives, 40 false positives, and 7 false negatives.

| ID         | Name                             | pmid                            | status | ID         | Name                                | pmid                | status |
|------------|----------------------------------|---------------------------------|--------|------------|-------------------------------------|---------------------|--------|
| HP:0001903 | Anemia                           |                                 | FP     | HP:0005263 | Gastritis                           |                     | FP     |
| HP:0002960 | Autoimmunity                     | 4890425                         | TP     | HP:0002024 | Malabsorption                       |                     | FP     |
| HP:0001889 | Megaloblastic anemia             | 11005035                        | TP     | HP:0100570 | Carcinoid                           |                     | FP     |
| HP:0002582 | Chronic atrophic gastritis       |                                 | FP     | HP:0001980 | Megaloblastic bone marrow           | 3332113             | TP     |
| HP:0001045 | Vitiligo                         |                                 | FP     | HP:0002592 | Gastric ulcer                       |                     | FP     |
| HP:0000820 | Abnormality of the thyroid gland |                                 | FP     | HP:0002588 | Duodenal ulcer                      |                     | FP     |
| HP:0001972 | Macrocytic anemia                | 11005035                        | TP     | HP:0008207 | Primary adrenal insufficiency       |                     | FP     |
| HP:0100646 | Thyroiditis                      |                                 | FP     | HP:0001891 | Iron deficiency anemia              |                     | FP     |
| HP:0009830 | Peripheral neuropathy            | 19689867                        | TP     | HP:0002044 | Zollinger-Ellison syndrome          |                     | FP     |
| HP:0005231 | Chronic gastritis                |                                 | FP     | HP:0005219 | Absence of intrinsic factor         | 3332113             | TP     |
| HP:0000819 | Diabetes mellitus                |                                 | FP     | HP:0000872 | Hashimoto thyroiditis               |                     | FP     |
| HP:0000821 | Hypothyroidism                   |                                 | FP     | HP:0001876 | Pancytopenia                        | 18622120            | TP     |
| HP:0004313 | Hypogammaglobulinemia            | 3544232                         | TP     | HP:0004395 | Malnutrition                        |                     | FP     |
| HP:0001890 | Autoimmune hemolytic anemia      |                                 | FP     | HP:0100651 | Type I diabetes mellitus            |                     | FP     |
| HP:0005202 | Helicobacter pylori infection    |                                 | FP     | HP:0100647 | Graves disease                      |                     | FP     |
| HP:0002725 | Systemic lupus erythematosus     |                                 | FP     | HP:0002196 | Myelopathy                          | 6166087<br>435137   | TP     |
| HP:0002527 | Falls                            |                                 | FP     | HP:0001878 | Hemolytic anemia                    |                     | FP     |
| HP:0002608 | Celiac disease                   |                                 | FP     | HP:0001370 | Rheumatoid arthritis                |                     | FP     |
| HP:0002835 | Aspiration                       |                                 | FP     | HP:0001324 | Muscle weakness                     |                     | FP     |
| HP:0000726 | Dementia                         | 10367704                        | TP     | HP:0000206 | Glossitis                           | 18125798            | TP     |
| HP:0005518 | Erythrocyte macrocytosis         | 3332113                         | TP     | HP:0001973 | Autoimmune thrombocytopenia         |                     | FP     |
| HP:0010972 | Anemia of inadequate production  | 857850                          | TP     | HP:0003881 | Humeral sclerosis                   |                     | FP     |
| HP:0003473 | Fatigable weakness               |                                 | FP     | HP:0006753 | Neoplasm of the stomach             | 23216458            | TP     |
| HP:0001251 | Ataxia                           | 1648656                         | TP     | HP:0000836 | Hyperthyroidism                     |                     | FP     |
| HP:0002721 | Immunodeficiency                 |                                 | FP     | HP:0002863 | Myelodysplasia                      |                     | FP     |
| HP:0001508 | Failure to thrive                | 20404749<br>1432418<br>18454811 | TP     | HP:0001733 | Pancreatitis                        |                     | FP     |
| HP:0001873 | Thrombocytopenia                 |                                 | FP     | HP:0003401 | Paresthesia                         | 18153465            | TP     |
| HP:0011273 | Anisocytosis                     |                                 | FP     | HP:0100751 | Esophageal neoplasm                 |                     | FP     |
| HP:0002571 | Achalasia                        |                                 | FP     | HP:0001138 | Optic neuropathy                    | 15587778            | FN     |
| HP:0001271 | Polyneuropathy                   | 12975298                        | FN     | HP:0000709 | Psychosis                           | 6849439<br>20807971 | FN     |
| HP:0002403 | Positive Romberg sign            | 9658486                         | FN     | HP:0010871 | Sensory ataxia                      | 11275463            | FN     |
| HP:0003487 | Babinski sign                    | 11503492                        | FN     | HP:0004340 | Abnormality of vitamin B metabolism | 265681              | FN     |

**Table S5.** Overview of HPO annotations for **Diabetic Ketoacidosis** that were derived by concept recognition in PubMed using BioLark. There were 29 true positives, 40 false positives, and 62 false negatives.

| ID         | Name                                 | pmid     | status | ID         | Name                                 | pmid     | status |
|------------|--------------------------------------|----------|--------|------------|--------------------------------------|----------|--------|
| HP:0001953 | Diabetic ketoacidosis                | 6281619  | TP     | HP:0001993 | Ketoacidosis                         | -        | TP     |
| HP:0003074 | Hyperglycemia                        | 15460517 | TP     | HP:0001946 | Ketosis                              | -        | TP     |
| HP:0001943 | Hypoglycemia                         |          | FP     | HP:0001941 | Acidosis                             | -        | TP     |
| HP:0005974 | Episodic ketoacidosis                |          | FP     | HP:0100651 | Type I diabetes mellitus             |          | FP     |
| HP:0001942 | Metabolic acidosis                   | -        | TP     | HP:0001259 | Coma                                 | 1788182  | TP     |
| HP:0002181 | Cerebral edema                       | 20420811 | TP     | HP:0002919 | Ketonuria                            | 23357396 | TP     |
| HP:0001944 | Dehydration                          | 17632987 | TP     | HP:0005979 | Metabolic ketoacidosis               | 15095958 | TP     |
| HP:0000819 | Diabetes mellitus                    |          | FP     | HP:0003128 | Lactic acidosis                      |          | FP     |
| HP:0001733 | Pancreatitis                         |          | FP     | HP:0000855 | Insulin resistance                   |          | FP     |
| HP:0002900 | Hypokalemia                          | 16191494 | TP     | HP:0002527 | Falls                                |          | FP     |
| HP:0001513 | Obesity                              |          | FP     | HP:0001959 | Polydipsia                           | 23075084 | TP     |
| HP:0003076 | Glycosuria                           | 6331271  | TP     | HP:0001824 | Weight loss                          |          | FP     |
| HP:0002013 | Vomiting                             | 22267622 | TP     | HP:0002027 | Abdominal pain                       | 22267622 | TP     |
| HP:0002148 | Hypophosphatemia                     |          | FP     | HP:0001735 | Acute pancreatitis                   |          | FP     |
| HP:0000488 | Retinopathy                          |          | FP     | HP:0000718 | Aggressive behavior                  |          | FP     |
| HP:0002960 | Autoimmunity                         |          | FP     | HP:0009830 | Peripheral neuropathy                |          | FP     |
| HP:0005978 | Type II diabetes mellitus            |          | FP     | HP:0000112 | Nephropathy                          |          | FP     |
| HP:0001988 | Recurrent hypoglycemia               |          | FP     | HP:0009800 | Maternal diabetes                    |          | FP     |
| HP:0100806 | Sepsis                               | 9822196  | TP     | HP:0100753 | Schizophrenia                        |          | FP     |
| HP:0002017 | Nausea and vomiting                  | -        | TP     | HP:0002153 | Hyperkalemia                         | 20420664 | TP     |
| HP:0001658 | Myocardial infarction                | 822609   | TP     | HP:0001254 | Lethargy                             | 22267622 | TP     |
| HP:0100598 | Pulmonary edema                      | 6767583  | TP     | HP:0001325 | Hypoglycemic coma                    |          | FP     |
| HP:0001950 | Respiratory alkalosis                |          | FP     | HP:0000083 | Renal insufficiency                  |          | FP     |
| HP:0003201 | Rhabdomyolysis                       | 20397738 | TP     | HP:0002098 | Respiratory distress                 |          | FP     |
| HP:0001250 | Seizures                             | 15960181 | TP     | HP:0001673 | Tachycardia (with pheochromocytoma)  |          | FP     |
| HP:0011106 | Hypovolemia                          | 23283273 | TP     | HP:0002615 | Hypotension                          | 23283273 | TP     |
| HP:0001397 | Hepatic steatosis                    |          | FP     | HP:0002093 | Respiratory insufficiency            |          | FP     |
| HP:0000822 | Hypertension                         | 23283273 | TP     | HP:0001297 | Stroke                               |          | FP     |
| HP:0002344 | Progressive neurologic deterioration |          | FP     | HP:0001289 | Confusion                            | 22267622 | TP     |
| HP:0001324 | Muscle weakness                      |          | FP     | HP:0000246 | Sinusitis                            |          | FP     |
| HP:0004395 | Malnutrition                         |          | FP     | HP:0000831 | Insulin-resistant diabetes mellitus  |          | FP     |
| HP:0002039 | Anorexia                             |          | FP     | HP:0011947 | Respiratory tract infection          |          | FP     |
| HP:0002719 | Recurrent infections                 |          | FP     | HP:0004904 | Maturity-onset diabetes of the young |          | FP     |
| HP:0002018 | Nausea                               | 18520103 | TP     | HP:0006543 | Cardiorespiratory arrest             |          | FP     |
| HP:0002574 | Episodic abdominal pain              |          | FP     | HP:0004918 | hyperchloremic metabolic acidosis    | 10030094 | FN     |
| HP:0001986 | Hypertonic dehydration               | 822694   | FN     | HP:0004900 | Severe lactic acidosis               | 16791396 | FN     |
| HP:0001995 | Hyperchloremic acidosis              | 1826776  | FN     | HP:0002151 | Increased serum lactate              | 7885271  | FN     |
| HP:0008942 | Acute rhabdomyolysis                 | 14655521 | FN     | HP:0006279 | Beta-cell dysfunction                | 17599861 | FN     |
| HP:0003228 | Hypertatremia                        | 8696061  | FN     | HP:0002917 | Hypomagnesemia                       | 10224681 | FN     |
| HP:0002789 | Tachypnea                            | 19106720 | FN     | HP:0005305 | Cerebral venous thrombosis           | 21244475 | FN     |
| HP:0000103 | Polyuria                             | 22104427 | FN     | HP:0002516 | Increased intracranial pressure      | 3150280  | FN     |
| HP:0002329 | Drowsiness                           | 16489969 | FN     | HP:0002072 | Chorea                               | 21632136 | FN     |
| HP:0007185 | Loss of consciousness                | 17185803 | FN     | HP:0100537 | Fasciitis                            | 6418495  | FN     |

*continued on the next page*

**Table S5. Diabetic Ketoacidosis – continued**

| <b>ID</b>  | <b>Name</b>                              | <b>pmid</b> | <b>status</b> | <b>ID</b>  | <b>Name</b>                                 | <b>pmid</b> | <b>status</b> |
|------------|------------------------------------------|-------------|---------------|------------|---------------------------------------------|-------------|---------------|
| HP:0001278 | Orthostatic hypotension                  | 6798666     | FN            | HP:0002902 | Hyponatremia                                | 814023      | FN            |
| HP:0002883 | Hyperventilation                         | 15982426    | FN            | HP:0005521 | Disseminated intravas-<br>cular coagulation | 825399      | FN            |
| HP:0003259 | Elevated serum creati-<br>nine           | 6441297     | FN            | HP:0100724 | Hypercoagulability                          | 17380929    | FN            |
| HP:0002155 | Hypertriglyceridemia                     | 19667310    | FN            | HP:0000975 | Hyperhidrosis                               | 22356444    | FN            |
| HP:0002625 | Deep venous thrombosis                   | 22356837    | FN            | HP:0001919 | Acute kidney injury                         | 12708572    | FN            |
| HP:0001974 | Leukocytosis                             | 821284      | FN            | HP:0003077 | Hyperlipidemia                              | 22233951    | FN            |
| HP:0000093 | Proteinuria                              | 6420364     | FN            | HP:0001695 | Cardiac arrest                              | 12748130    | FN            |
| HP:0001298 | Encephalopathy                           | 20420811    | FN            | HP:0001907 | Thromboembolism                             | 19542020    | FN            |
| HP:0002014 | Diarrhea                                 | 21551959    | FN            | HP:0002637 | Cerebral ischemia                           | 23515102    | FN            |
| HP:0011675 | Arrhythmia                               | 21316179    | FN            | HP:0001939 | Abnormality of<br>metabolism/homeostasis    | -           | FN            |
| HP:0000017 | Nocturia                                 | 21381577    | FN            | HP:0001342 | Cerebral hemorrhage                         | 18039811    | FN            |
| HP:0002157 | Azotemia                                 | 22391852    | FN            | HP:0003256 | Abnormality of the coag-<br>ulation cascade | -           | FN            |
| HP:0002239 | Gastrointestinal hemor-<br>rhage         | 8565740     | FN            | HP:0004936 | Venous thrombosis                           | -           | FN            |
| HP:0003111 | Abnormality of ion<br>homeostasis        | -           | FN            | HP:0011458 | Abdominal symptom                           | -           | FN            |
| HP:0004420 | Arterial thrombosis                      | 16570569    | FN            | HP:0000737 | Irritability                                | 8685764     | FN            |
| HP:0002170 | Intracranial hemorrhage                  | 1698585     | FN            | HP:0004372 | Reduced conscious-<br>ness/confusion        | -           | FN            |
| HP:0006846 | Acute encephalopathy                     | 403389      | FN            | HP:0000217 | Xerostomia                                  | 14575617    | FN            |
| HP:0002315 | Headache                                 | 23772471    | FN            | HP:0008279 | Transient hyperlipi-<br>demia               | 11051350    | FN            |
| HP:0003113 | Hypochloremia                            | 19606251    | FN            | HP:0002641 | Peripheral thrombosis                       | 17315523    | FN            |
| HP:0100812 | Halitosis                                | -           | FN            | HP:0002905 | Hyperphosphatemia                           | 3933341     | FN            |
| HP:0000805 | Enuresis                                 | 22145453    | FN            | HP:0001262 | Somnolence                                  | 8844491     | FN            |
| HP:0000713 | Agitation                                | 16489969    | FN            | HP:0002149 | Hyperuricemia                               | 14483098    | FN            |
| HP:0004360 | Abnormality of acid-<br>base homeostasis | -           | FN            |            |                                             |             |               |

**Table S6.** Overview of HPO annotations for **Hemochromatosis** that were derived by concept recognition in PubMed using BioLark. There were 31 true positives, 68 false positives, and 14 false negatives.

| ID         | Name                                   | pmid                | status | ID         | Name                            | pmid                | status |
|------------|----------------------------------------|---------------------|--------|------------|---------------------------------|---------------------|--------|
| HP:0001394 | Cirrhosis                              | 9867745             | TP     | HP:0003281 | Increased serum ferritin        | 9422115<br>11531973 | TP     |
| HP:0001903 | Anemia                                 |                     | FP     | HP:0003040 | Arthropathy                     | 1788814             | TP     |
| HP:0001402 | Hepatocellular carcinoma               | 6282722<br>12828961 | TP     | HP:0005560 | Imbalanced hemoglobin synthesis |                     | FP     |
| HP:0001395 | Hepatic fibrosis                       | 11832443            | TP     | HP:0000135 | Hypogonadism                    |                     | FP     |
| HP:0000819 | Diabetes mellitus                      |                     | FP     | HP:0001399 | Hepatic failure                 |                     | FP     |
| HP:0001638 | Cardiomyopathy                         | 9867745             | TP     | HP:0001397 | Hepatic steatosis               |                     | FP     |
| HP:0003452 | Increased serum iron                   | 19477142            | TP     | HP:0001635 | Congestive heart failure        |                     | FP     |
| HP:0001000 | Abnormality of skin pigmentation       |                     | FP     | HP:0001369 | Arthritis                       |                     | FP     |
| HP:0002910 | Elevated hepatic transaminases         | 8094554             | TP     | HP:0001891 | Iron deficiency anemia          |                     | FP     |
| HP:0000934 | Chondrocalcinosis                      | 12117686            | TP     | HP:0006562 | Viral hepatitis                 |                     | FP     |
| HP:0009824 | Upper limb undergrowth                 |                     | FP     | HP:0000802 | Impotence                       | 19477142            | TP     |
| HP:0002896 | Neoplasm of the liver                  |                     | FP     | HP:0003365 | Arthralgia of the hip           |                     | FP     |
| HP:0002240 | Hepatomegaly                           | 24343468            | TP     | HP:0000855 | Insulin resistance              |                     | FP     |
| HP:0001410 | Decreased liver function               | 17606206            | TP     | HP:0010972 | Anemia of inadequate production |                     | FP     |
| HP:0001733 | Pancreatitis                           |                     | FP     | HP:0001924 | Sideroblastic anemia            | 4017031             | TP     |
| HP:0007354 | Amyotrophic lateral sclerosis          |                     | FP     | HP:0002613 | Biliary cirrhosis               |                     | FP     |
| HP:0100646 | Thyroiditis                            |                     | FP     | HP:0000044 | Hypogonadotropic hypogonadism   | 9867745             | TP     |
| HP:0001644 | Dilated cardiomyopathy                 | 6418103             | TP     | HP:0002829 | Arthralgia                      | 17471841            | TP     |
| HP:0011675 | Arrhythmia                             |                     | FP     | HP:0002758 | Osteoarthritis                  |                     | FP     |
| HP:0000939 | Osteoporosis                           |                     | FP     | HP:0001878 | Hemolytic anemia                |                     | FP     |
| HP:0006554 | Acute hepatic failure                  |                     | FP     | HP:0000833 | Glucose intolerance             |                     | FP     |
| HP:0002960 | Autoimmunity                           |                     | FP     | HP:0002608 | Celiac disease                  |                     | FP     |
| HP:0001409 | Portal hypertension                    | 7557861             | TP     | HP:0004810 | Congenital hypoplastic anemia   |                     | FP     |
| HP:0001541 | Ascites                                | 8867884             | TP     | HP:0001324 | Muscle weakness                 |                     | FP     |
| HP:0005505 | Refractory anemia                      |                     | FP     | HP:0001513 | Obesity                         |                     | FP     |
| HP:0001915 | Aplastic anemia                        |                     | FP     | HP:0004444 | Spherocytosis                   |                     | FP     |
| HP:0006580 | Portal fibrosis                        | 18160317            | TP     | HP:0000718 | Aggressive behavior             |                     | FP     |
| HP:0002863 | Myelodysplasia                         |                     | FP     | HP:0000952 | Jaundice                        | 19477142            | TP     |
| HP:0000821 | Hypothyroidism                         |                     | FP     | HP:0100806 | Sepsis                          |                     | FP     |
| HP:0002027 | Abdominal pain                         | 6418636             | TP     | HP:0002621 | Atherosclerosis                 |                     | FP     |
| HP:0003256 | Abnormality of the coagulation cascade |                     | FP     | HP:0001370 | Rheumatoid arthritis            |                     | FP     |
| HP:0000953 | Hyperpigmentation of the skin          | 2986052             | TP     | HP:0100544 | Neoplasm of the heart           |                     | FP     |
| HP:0001900 | Increased hemoglobin                   |                     | FP     | HP:0004870 | Chronic hemolytic anemia        |                     | FP     |
| HP:0000083 | Renal insufficiency                    |                     | FP     | HP:0001824 | Weight loss                     |                     | FP     |
| HP:0002527 | Falls                                  |                     | FP     | HP:0003231 | Hypertyrosinemia                |                     | FP     |
| HP:0011031 | Abnormality of iron homeostasis        |                     | FP     | HP:0003881 | Humeral sclerosis               |                     | FP     |
| HP:0011034 | Amyloidosis                            |                     | FP     | HP:0000938 | Osteopenia                      |                     | FP     |
| HP:0002719 | Recurrent infections                   |                     | FP     | HP:0004325 | Decreased body weight           |                     | FP     |
| HP:0000992 | Cutaneous photosensitivity             |                     | FP     | HP:0002480 | Hepatic encephalopathy          | 1936813             | TP     |
| HP:0001723 | Restrictive cardiomyopathy             | 6418103             | TP     | HP:0004377 | Hematological neoplasm          |                     | FP     |
| HP:0001943 | Hypoglycemia                           |                     | FP     | HP:0002619 | Varicose veins                  |                     | FP     |
| HP:0002511 | Alzheimer disease                      |                     | FP     | HP:0001413 | Micronodular cirrhosis          | 3909817             | TP     |
| HP:0001744 | Splenomegaly                           | 24343468            | TP     | HP:0001658 | Myocardial infarction           |                     | FP     |
| HP:0001405 | Periportal fibrosis                    | 474711              | TP     | HP:0001945 | Fever                           |                     | FP     |

*continued on the next page*



**Table S6. Hemochromatosis – continued**

| <b>ID</b>  | <b>Name</b>                   | <b>pmid</b>        | <b>status</b> | <b>ID</b>  | <b>Name</b>                     | <b>pmid</b>         | <b>status</b> |
|------------|-------------------------------|--------------------|---------------|------------|---------------------------------|---------------------|---------------|
| HP:0100523 | Liver abscess                 |                    | FP            | HP:0000740 | Anxiety (with pheochromocytoma) |                     | FP            |
| HP:0000518 | Cataract                      |                    | FP            | HP:0001254 | Lethargy                        | 16315132            | TP            |
| HP:0003073 | Hypoalbuminemia               | 9543801<br>1312985 | TP            | HP:0000829 | Hypoparathyroidism              | 7572161             | TP            |
| HP:0002611 | Cholestatic liver disease     | 9285385            | TP            | HP:0000822 | Hypertension                    |                     | FP            |
| HP:0000842 | Hyperinsulinemia              |                    | FP            | HP:0004787 | Fulminant hepatitis             |                     | FP            |
| HP:0012024 | Hypergalactosemia             |                    | FP            | HP:0000029 | Testicular atrophy              | 21549511            | FN            |
| HP:0001404 | Hepatocellular necrosis       | 20665379           | FN            | HP:0000823 | Delayed puberty                 | 8432779             | FN            |
| HP:0002749 | Osteomalacia                  | 2783312            | FN            | HP:0001433 | Hepatosplenomegaly              | 24343468            | FN            |
| HP:0000141 | Amenorrhea                    | 8867884            | FN            | HP:0000789 | Infertility                     | 7263194<br>14991275 | FN            |
| HP:0009830 | Peripheral neuropathy         | 20358215           | FN            | HP:0000771 | Gynecomastia                    | 1392425             | FN            |
| HP:0000869 | Secondary amenorrhea          | 8867884            | FN            | HP:0001387 | Joint stiffness                 | 6652983<br>19018338 | FN            |
| HP:0003155 | Elevated alkaline phosphatase | 1914539            | FN            | HP:0100769 | Synovitis                       | 19933745            | FN            |
| HP:0010788 | Testicular neoplasm           | 21549511           | FN            |            |                                 |                     |               |

**Table S7.** Overview of HPO annotations for **Anti-Glomerular Basement Membrane Disease** that were derived by concept recognition in PubMed using BioLark. There were 28 true positives, 17 false positives, and 22 false negatives.

| ID         | Name                                   | pmid     | status | ID         | Name                                     | pmid     | status |
|------------|----------------------------------------|----------|--------|------------|------------------------------------------|----------|--------|
| HP:0000099 | Glomerulonephritis                     | 7246141  | TP     | HP:0000093 | Proteinuria                              | 9453010  | TP     |
| HP:0003453 | Antineutrophil antibody positivity     | 19695059 | TP     | HP:0002960 | Autoimmunity                             | 10896942 | TP     |
| HP:0000123 | Nephritis                              | 948570   | TP     | HP:0002633 | Vasculitis                               | 9469509  | TP     |
| HP:0002105 | Hemoptysis                             | 11523135 | TP     | HP:0000083 | Renal insufficiency                      | 7246141  | TP     |
| HP:0002955 | Granulomatosis                         |          | FP     | HP:0008653 | Crescentic glomerulonephritis            | 6211894  | TP     |
| HP:0000790 | Hematuria                              | 8336406  | TP     | HP:0001919 | Acute renal failure                      | 12727586 | TP     |
| HP:0003774 | End stage renal disease                | 4011844  | TP     | HP:0002725 | Systemic lupus erythematosus             |          | FP     |
| HP:0000794 | IgA nephropathy                        |          | FP     | HP:0000112 | Nephropathy                              | 6211894  | TP     |
| HP:0002093 | Respiratory insufficiency              | 22251235 | TP     | HP:0001903 | Anemia                                   | 8431025  | TP     |
| HP:0002113 | Pulmonary infiltrates                  | 4023439  | TP     | HP:0003259 | Increased creatinine                     | 8084449  | TP     |
| HP:0000979 | Purpura                                |          | FP     | HP:0000793 | Membranoproliferative glomerulonephritis |          | FP     |
| HP:0000718 | Aggressive behavior                    |          | FP     | HP:0100520 | Oliguria                                 | 19151145 | TP     |
| HP:0003881 | Humeral sclerosis                      |          | FP     | HP:0100519 | Anuria                                   | 19151145 | TP     |
| HP:0000097 | Focal segmental glomerulosclerosis     |          | FP     | HP:0000100 | Nephrotic syndrome                       | 794860   | TP     |
| HP:0000096 | Glomerulosclerosis                     | 15496153 | TP     | HP:0001970 | Tubulointerstitial nephritis             |          | FP     |
| HP:0002907 | Microhematuria                         | 7246141  | TP     | HP:0100820 | Glomerulopathy                           | 8971896  | TP     |
| HP:0001945 | Fever                                  | 8203372  | TP     | HP:0000822 | Hypertension                             |          | FP     |
| HP:0006530 | Interstitial pulmonary disease         | 8431025  | TP     | HP:0011944 | Small vessel vasculitis                  |          | FP     |
| HP:0002157 | Azotemia                               | 16408434 | TP     | HP:0000969 | Edema                                    |          | FP     |
| HP:0001370 | Rheumatoid arthritis                   |          | FP     | HP:0003493 | Antinuclear antibody positivity          | 16767317 | TP     |
| HP:0002206 | Pulmonary fibrosis                     |          | FP     | HP:0003613 | Antiphospholipid antibody positivity     |          | FP     |
| HP:0100598 | Pulmonary edema                        |          | FP     | HP:0006535 | Recurrent intrapulmonary hemorrhage      | 3917391  | TP     |
| HP:0001973 | Autoimmune thrombocytopenia            |          | FP     | HP:0002098 | Respiratory distress                     | 9361103  | FN     |
| HP:0002094 | Dyspnea                                | 2214405  | FN     | HP:0001891 | Iron deficiency anemia                   | 8532389  | FN     |
| HP:0001250 | Seizures                               | 22251235 | FN     | HP:0005576 | Tubulointerstitial fibrosis              | 17516154 | FN     |
| HP:0002875 | Exertional dyspnea                     | 10496107 | FN     | HP:0001880 | Eosinophilia                             | 12955709 | FN     |
| HP:0001897 | Normocytic anemia                      | 16894954 | FN     | HP:0000622 | Blurred vision                           | 8409194  | FN     |
| HP:0005521 | Disseminated intravascular coagulation | 10087878 | FN     | HP:0003326 | Myalgia                                  | 8203372  | FN     |
| HP:0001342 | Cerebral hemorrhage                    | 9355084  | FN     | HP:0000541 | Retinal detachment                       | 8409194  | FN     |
| HP:0002039 | Anorexia                               | 8820507  | FN     | HP:0000821 | Hypothyroidism                           | 10720217 | FN     |
| HP:0007898 | Exudative retinopathy                  | 8409194  | FN     | HP:0200029 | Vasculitis in the skin                   | 3184080  | FN     |
| HP:0001935 | Microcytic anemia                      | 10502944 | FN     | HP:0003075 | Hypoproteinemia                          | 10502944 | FN     |
| HP:0000121 | Nephrocalcinosis                       | 930188   | FN     | HP:0003324 | Generalized muscle weakness              | 10750432 | FN     |
| HP:0001954 | Episodic fever                         | 23515881 | FN     |            |                                          |          |        |

**Table S8.** Overview of HPO annotations for **Common Variable Immunodeficiency** that were derived by concept recognition in PubMed using BioLark. There were 42 true positives, 27 false positives, and 32 false negatives.

| ID         | Name                                              | pmid     | status | ID         | Name                                         | pmid     | status |
|------------|---------------------------------------------------|----------|--------|------------|----------------------------------------------|----------|--------|
| HP:0002721 | Immunodeficiency                                  | -        | TP     | HP:0004313 | Hypogammaglobulinemia                        | 19671377 | TP     |
| HP:0002960 | Autoimmunity                                      |          | FP     | HP:0002719 | Recurrent infections                         | -        | TP     |
| HP:0004432 | Agammaglobulinemia                                |          | FP     | HP:0002718 | Recurrent bacterial infections               | 11861266 | TP     |
| HP:0002720 | IgA deficiency                                    | 22983507 | TP     | HP:0002110 | Bronchiectasis                               | 20635788 | TP     |
| HP:0004315 | IgG deficiency                                    | 20434118 | TP     | HP:0001744 | Splenomegaly                                 | 9822285  | TP     |
| HP:0002205 | Recurrent respiratory infections                  | 16794375 | TP     | HP:0011947 | Respiratory tract infection                  |          | FP     |
| HP:0002843 | Abnormality of T cells                            | 10993290 | TP     | HP:0002665 | Lymphoma                                     | 20332369 | TP     |
| HP:0002958 | Immune dysregulation                              | 19671377 | TP     | HP:0005425 | Recurrent sinopulmonary infections           | 20402074 | TP     |
| HP:0002090 | Pneumonia                                         | -        | TP     | HP:0002850 | IgM deficiency                               | 23379434 | TP     |
| HP:0001973 | Autoimmune thrombocytopenia                       | 19716342 | TP     | HP:0002028 | Chronic diarrhea                             | 17629033 | TP     |
| HP:0002024 | Malabsorption                                     | 15248108 | TP     | HP:0001890 | Autoimmune hemolytic anemia                  | 19671377 | TP     |
| HP:0006532 | Recurrent pneumonia                               | 12709641 | TP     | HP:0005479 | IgE deficiency                               |          | FP     |
| HP:0005523 | Lymphoproliferative disorder                      | 17601274 | TP     | HP:0001888 | Lymphopenia                                  | 12165093 | TP     |
| HP:0002242 | Abnormality of the intestine                      |          | FP     | HP:0005435 | Impaired T cell function                     | 8050170  | TP     |
| HP:0001903 | Anemia                                            | 16789508 | TP     | HP:0002014 | Diarrhea                                     |          | FP     |
| HP:0004430 | Severe combined immunodeficiency                  |          | FP     | HP:0006530 | Interstitial pulmonary disease               | 22930256 | TP     |
| HP:0002037 | Inflammation of the large intestine               |          | FP     | HP:0002608 | Celiac disease                               |          | FP     |
| HP:0000246 | Sinusitis                                         | 18419489 | TP     | HP:0001873 | Thrombocytopenia                             |          | FP     |
| HP:0010702 | Hypergammaglobulinemia                            |          | FP     | HP:0011473 | Villous atrophy                              | 14550517 | TP     |
| HP:0003095 | Septic arthritis                                  | 8945717  | TP     | HP:0005365 | Severe B lymphocytopenia                     | 8027379  | TP     |
| HP:0002846 | Abnormality of B cells                            | 17521034 | TP     | HP:0002099 | Asthma                                       |          | FP     |
| HP:0004798 | Recurrent infection of the gastrointestinal tract | 18953945 | TP     | HP:0001875 | Neutropenia                                  | 17165275 | TP     |
| HP:0006528 | Chronic lung disease                              | 22180439 | TP     | HP:0001945 | Fever                                        | 17165275 | TP     |
| HP:0001370 | Rheumatoid arthritis                              | 19671377 | TP     | HP:0005357 | Defective B cell differentiation             | 23714403 | TP     |
| HP:0003237 | Increased IgG level                               |          | FP     | HP:0002783 | Recurrent lower respiratory tract infections | 12164371 | TP     |
| HP:0000979 | Purpura                                           | 19671377 | TP     | HP:0011108 | Recurrent sinusitis                          | 15005811 | TP     |
| HP:0001009 | Telangiectasia                                    |          | FP     | HP:0000388 | Otitis media                                 | 19230900 | TP     |
| HP:0001399 | Hepatic failure                                   |          | FP     | HP:0006515 | Interstitial pneumonitis                     |          | FP     |
| HP:0001251 | Ataxia                                            |          | FP     | HP:0100280 | Crohn's disease                              |          | FP     |
| HP:0006527 | Lymphoid interstitial pneumonia                   | 12709641 | TP     | HP:0002583 | Colitis                                      |          | FP     |
| HP:0003139 | Panhypogammaglobulinemia                          |          | FP     | HP:0100827 | Lymphocytosis                                | 17194667 | TP     |
| HP:0005432 | Transient hypogammaglobulinemia of infancy        |          | FP     | HP:0002961 | Dysgammaglobulinemia                         |          | FP     |
| HP:0003496 | Increased IgM level                               |          | FP     | HP:0011950 | Bronchiolitis                                |          | FP     |
| HP:0010701 | Abnormal immunoglobulin level                     |          | FP     | HP:0010977 | Abnormality of phagocytes                    |          | FP     |
| HP:0002209 | Sparse scalp hair                                 |          | FP     | HP:0002729 | Follicular hyperplasia                       | 18054123 | FN     |
| HP:0011109 | Chronic sinusitis                                 | 16252205 | FN     | HP:0001433 | Hepatosplenomegaly                           | 17601274 | FN     |
| HP:0200043 | Verrucae                                          | 17902733 | FN     | HP:0005681 | Juvenile rheumatoid arthritis                | 17671947 | FN     |
| HP:0002955 | Granulomatosis                                    | 16413828 | FN     | HP:0005387 | Combined immunodeficiency                    | 11514920 | FN     |
| HP:0001876 | Pancytopenia                                      | 22413915 | FN     | HP:0001878 | Hemolytic anemia                             | 19716342 | FN     |

*continued on the next page*

**Table S8. Common Variable Immunodeficiency – continued**

| <b>ID</b>  | <b>Name</b>                          | <b>pmid</b>                                              | <b>status</b> | <b>ID</b>  | <b>Name</b>                                  | <b>pmid</b>                      | <b>status</b> |
|------------|--------------------------------------|----------------------------------------------------------|---------------|------------|----------------------------------------------|----------------------------------|---------------|
| HP:0000554 | Uveitis                              | 22506485                                                 | FN            | HP:0002788 | Recurrent upper respiratory tract infections | 18419489                         | FN            |
| HP:0001409 | Portal hypertension                  | 23420139                                                 | FN            | HP:0001581 | Recurrent skin infections                    | 19419461                         | FN            |
| HP:0005263 | Gastritis                            | 8228799                                                  | FN            | HP:0002716 | Lymphadenopathy                              | 17556024                         | FN            |
| HP:0100279 | Ulcerative colitis                   | 16329682                                                 | FN            | HP:0002633 | Vasculitis                                   | 10682991                         | FN            |
| HP:0002725 | Systemic lupus erythematosus         | 19671377                                                 | FN            | HP:0001287 | Meningitis                                   | 15513403                         | FN            |
| HP:0001369 | Arthritis                            | 19326121<br>16909702<br>15875533<br>21776287<br>17671947 | FN            | HP:0005419 | Decreased T cell activation                  | 19671377                         | FN            |
| HP:0005390 | Recurrent opportunistic infections   | -                                                        | FN            | HP:0001904 | Autoimmune neutropenia                       | 16127007                         | FN            |
| HP:0100721 | Mediastinal lymphadenopathy          | 20635788                                                 | FN            | HP:0001045 | Vitiligo                                     | 21139556                         | FN            |
| HP:0000010 | Recurrent urinary tract infections   | -                                                        | FN            | HP:0100646 | Thyroiditis                                  | 19671377                         | FN            |
| HP:0010976 | B lymphocytopenia                    | 8027379                                                  | FN            | HP:0100537 | Fasciitis                                    | 11809601<br>23129076<br>22575775 | FN            |
| HP:0006946 | Recurrent meningitis                 | 15591667                                                 | FN            | HP:0003613 | Antiphospholipid antibody positivity         | 20635793<br>21776287             | FN            |
| HP:0011117 | Abnormality of interleukin secretion | 7586680                                                  | FN            |            |                                              |                                  |               |

**Table S9.** Overview of HPO annotations for **Biliary Liver Cirrhosis** that were derived by concept recognition in PubMed using BioLark. There were 32 true positives, 40 false positives, and 34 false negatives.

| ID         | Name                                      | pmid     | status | ID         | Name                             | pmid     | status |
|------------|-------------------------------------------|----------|--------|------------|----------------------------------|----------|--------|
| HP:0002613 | Biliary cirrhosis                         | 6896227  | TP     | HP:0001394 | Cirrhosis                        | -        | TP     |
| HP:0001396 | Cholestasis                               | 7082202  | TP     | HP:0002611 | Cholestatic liver disease        | 15560038 | TP     |
| HP:0000989 | Pruritus                                  | 22259000 | TP     | HP:0000952 | Jaundice                         | 4743495  | TP     |
| HP:0001409 | Portal hypertension                       | 7091126  | TP     | HP:0001399 | Hepatic failure                  | 15560038 | TP     |
| HP:0003493 | Antinuclear antibody positivity           | 3894432  | TP     | HP:0006562 | Viral hepatitis                  |          | FP     |
| HP:0001541 | Ascites                                   | 20606498 | TP     | HP:0003155 | Elevated alkaline phosphatase    | 17918011 | TP     |
| HP:0002619 | Varicose veins                            |          | FP     | HP:0001402 | Hepatocellular carcinoma         | 15560042 | TP     |
| HP:0001395 | Hepatic fibrosis                          | 22042492 | TP     | HP:0001406 | Intrahepatic cholestasis         |          | FP     |
| HP:0005912 | Biliary atresia                           |          | FP     | HP:0002725 | Systemic lupus erythematosus     |          | FP     |
| HP:0001397 | Hepatic steatosis                         |          | FP     | HP:0002040 | Esophageal varices               | 1085267  | TP     |
| HP:0000939 | Osteoporosis                              | 14594136 | TP     | HP:0001370 | Rheumatoid arthritis             |          | FP     |
| HP:0002910 | Elevated hepatic transaminases            | 15560032 | TP     | HP:0100324 | Scleroderma                      | 17294883 | TP     |
| HP:0003881 | Humeral sclerosis                         |          | FP     | HP:0001410 | Decreased liver function         | -        | TP     |
| HP:0006580 | Portal fibrosis                           |          | FP     | HP:0001081 | Cholelithiasis                   |          | FP     |
| HP:0100279 | Ulcerative colitis                        |          | FP     | HP:0000938 | Osteopenia                       | 7659915  | TP     |
| HP:0001408 | Bile duct proliferation                   | 8778189  | TP     | HP:0002480 | Hepatic encephalopathy           | 21641685 | TP     |
| HP:0002240 | Hepatomegaly                              | 21989789 | TP     | HP:0010702 | Hypergammaglobulinemia           |          | FP     |
| HP:0002749 | Osteomalacia                              |          | FP     | HP:0001324 | Muscle weakness                  |          | FP     |
| HP:0002608 | Celiac disease                            |          | FP     | HP:0001369 | Arthritis                        |          | FP     |
| HP:0100646 | Thyroiditis                               |          | FP     | HP:0002527 | Falls                            |          | FP     |
| HP:0000820 | Abnormality of the thyroid gland          |          | FP     | HP:0000872 | Hashimoto thyroiditis            |          | FP     |
| HP:0002239 | Gastrointestinal hemorrhage               |          | FP     | HP:0011838 | Sclerodactyly                    |          | FP     |
| HP:0000718 | Aggressive behavior                       |          | FP     | HP:0000969 | Edema                            |          | FP     |
| HP:0003124 | Hypercholesterolemia                      | 4030709  | TP     | HP:0003573 | Increased total bilirubin        |          | FP     |
| HP:0000010 | Recurrent urinary tract infections        |          | FP     | HP:0100512 | Vitamin D deficiency             | 73950    | TP     |
| HP:0003453 | Antineutrophil antibody positivity        |          | FP     | HP:0001000 | Abnormality of skin pigmentation |          | FP     |
| HP:0000991 | Xanthomatosis                             | 4346939  | TP     | HP:0001945 | Fever                            |          | FP     |
| HP:0000083 | Renal insufficiency                       |          | FP     | HP:0003365 | Arthralgia of the hip            |          | FP     |
| HP:0001009 | Telangiectasia                            | 12356109 | TP     | HP:0001947 | Renal tubular acidosis           | 5548562  | TP     |
| HP:0100513 | Vitamin E deficiency                      | 2910763  | TP     | HP:0003765 | Psoriasis                        |          | FP     |
| HP:0003077 | Hyperlipidemia                            |          | FP     | HP:0001045 | Vitiligo                         | 16481294 | TP     |
| HP:0004448 | Fulminant hepatic failure                 |          | FP     | HP:0000093 | Proteinuria                      |          | FP     |
| HP:0011892 | Vitamin K deficiency                      | 11569705 | TP     | HP:0000819 | Diabetes mellitus                |          | FP     |
| HP:0000855 | Insulin resistance                        |          | FP     | HP:0003259 | Increased creatinine             |          | FP     |
| HP:0001954 | Episodic fever                            |          | FP     | HP:0003073 | Hypoalbuminemia                  | 16181370 | TP     |
| HP:0000988 | Skin rash                                 | 17060877 | TP     | HP:0003149 | Hyperuricosuria                  |          | FP     |
| HP:0011954 | Nodular regenerative hyperplasia of liver | 2583572  | FN     | HP:0001114 | Xanthelasma                      | 1420396  | FN     |
| HP:0003496 | Increased IgM level                       | 14987744 | FN     | HP:0008341 | Distal renal tubular acidosis    | 15610460 | FN     |
| HP:0001404 | Hepatocellular necrosis                   | 1882800  | FN     | HP:0002570 | Steatorrhea                      | 2411648  | FN     |
| HP:0008151 | Prolonged prothrombin time                | 20856137 | FN     | HP:0004315 | IgG deficiency                   | 21645440 | FN     |
| HP:0011473 | Villous atrophy                           | 9412913  | FN     | HP:0001097 | Keratoconjunctivitis sicca       | 15539725 | FN     |

*continued on the next page*

**Table S9. Biliary Liver Cirrhosis – continued**

| <b>ID</b>  | <b>Name</b>                  | <b>pmid</b>                  | <b>status</b> | <b>ID</b>  | <b>Name</b>                       | <b>pmid</b>          | <b>status</b> |
|------------|------------------------------|------------------------------|---------------|------------|-----------------------------------|----------------------|---------------|
| HP:0003761 | Calcinosis                   | 12356109                     | FN            | HP:0002958 | Immune dysregulation              | 22135136             | FN            |
| HP:0001970 | Tubulointerstitial nephritis | 17294883<br>20466658         | FN            | HP:0001262 | Somnolence                        | 18237872             | FN            |
| HP:0002653 | Bone pain                    | 8878772                      | FN            | HP:0001254 | Lethargy                          | 15456326             | FN            |
| HP:0001433 | Hepatosplenomegaly           | 6324495                      | FN            | HP:0002756 | Pathologic fracture               | 20926953             | FN            |
| HP:0002459 | Dysautonomia                 | 19602135                     | FN            | HP:0100614 | Myositis                          | 15287510<br>23553600 | FN            |
| HP:0001973 | Autoimmune thrombocytopenia  | 4054707<br>8680553           | FN            | HP:0002904 | Hyperbilirubinemia                | 11206871             | FN            |
| HP:0002757 | Recurrent fractures          | 17087953                     | FN            | HP:0006554 | Acute hepatic failure             | 17657817             | FN            |
| HP:0002024 | Malabsorption                | 7429337                      | FN            | HP:0001880 | Eosinophilia                      | 8633501              | FN            |
| HP:0002039 | Anorexia                     | 4030709                      | FN            | HP:0002027 | Abdominal pain                    | 7942679              | FN            |
| HP:0001824 | Weight loss                  | 9820402                      | FN            | HP:0003262 | Smooth muscle antibody positivity | 7549131              | FN            |
| HP:0002630 | Fat malabsorption            | 3335317                      | FN            | HP:0006577 | Macronodular cirrhosis            | 6217390              | FN            |
| HP:0200032 | Kayser-Fleischer ring        | 842986<br>8458236<br>1150026 | FN            | HP:0100759 | Clubbing of fingers               | 7227854              | FN            |

**Table S10.** Overview of HPO annotations for **Dermatomyositis** that were derived by concept recognition in PubMed using BioLark. There were 39 true positives, 80 false positives, and 19 false negatives.

| ID         | Name                                          | pmid     | status | ID         | Name                                  | pmid     | status |
|------------|-----------------------------------------------|----------|--------|------------|---------------------------------------|----------|--------|
| HP:0100614 | Myositis                                      | 4753878  | TP     | HP:0009071 | Inflammatory myopathy                 | 9438396  | TP     |
| HP:0006530 | Interstitial pulmonary disease                | 23117947 | TP     | HP:0002725 | Systemic lupus erythematosus          |          | FP     |
| HP:0001324 | Muscle weakness                               |          | FP     | HP:0003761 | Calcinosis                            | 7017918  | TP     |
| HP:0100324 | Scleroderma                                   |          | FP     | HP:0003701 | Proximal muscle weakness              | 9438396  | TP     |
| HP:0003198 | Myopathy                                      |          | FP     | HP:0003881 | Humeral sclerosis                     |          | FP     |
| HP:0010783 | Erythema                                      | 23117947 | TP     | HP:0002633 | Vasculitis                            | 1845413  | TP     |
| HP:0003493 | Antinuclear antibody positivity               | 6787993  | TP     | HP:0001370 | Rheumatoid arthritis                  |          | FP     |
| HP:0000988 | Skin rash                                     | 1767082  | TP     | HP:0001369 | Arthritis                             | 23117947 | TP     |
| HP:0003326 | Myalgia                                       | 11003943 | TP     | HP:0002015 | Dysphagia                             |          | FP     |
| HP:0002206 | Pulmonary fibrosis                            |          | FP     | HP:0005681 | Juvenile rheumatoid arthritis         |          | FP     |
| HP:0001945 | Fever                                         |          | FP     | HP:0000718 | Aggressive behavior                   |          | FP     |
| HP:0006515 | Interstitial pneumonitis                      | 16328018 | TP     | HP:0002093 | Respiratory insufficiency             |          | FP     |
| HP:0003560 | Muscular dystrophy                            |          | FP     | HP:0003236 | Elevated serum creatine phosphokinase |          | FP     |
| HP:0000969 | Edema                                         |          | FP     | HP:0000964 | Eczema                                |          | FP     |
| HP:0003202 | Amyotrophy                                    |          | FP     | HP:0200042 | Skin ulcer                            | 17572631 | TP     |
| HP:0003473 | Fatigable weakness                            |          | FP     | HP:0001009 | Telangiectasia                        | 1845413  | TP     |
| HP:0003323 | Progressive muscle weakness                   | 11359403 | TP     | HP:0001371 | Flexion contracture                   | 23117947 | TP     |
| HP:0008978 | Necrotizing myopathy                          |          | FP     | HP:0002090 | Pneumonia                             |          | FP     |
| HP:0002665 | Lymphoma                                      |          | FP     | HP:0100539 | Periorbital edema                     | 9557787  | TP     |
| HP:0011945 | Bronchiolitis obliterans organizing pneumonia | 1246203  | TP     | HP:0002094 | Dyspnea                               |          | FP     |
| HP:0003365 | Arthralgia of the hip                         |          | FP     | HP:0002861 | Malignant melanoma                    |          | FP     |
| HP:0000989 | Pruritus                                      | 23112358 | TP     | HP:0100615 | Ovarian neoplasm                      |          | FP     |
| HP:0003765 | Psoriasis                                     |          | FP     | HP:0100633 | Esophagitis                           |          | FP     |
| HP:0000956 | Acanthosis nigricans                          |          | FP     | HP:0003805 | Rimmed vacuoles                       |          | FP     |
| HP:0005059 | arthralgia/arthritis                          | 3977973  | TP     | HP:0000992 | Cutaneous photosensitivity            | 15379871 | TP     |
| HP:0007430 | Generalized edema                             | 18984850 | TP     | HP:0001029 | Poikiloderma                          | 23112358 | TP     |
| HP:0002097 | Emphysema                                     |          | FP     | HP:0002829 | Arthralgia                            | 23117947 | TP     |
| HP:0001888 | Lymphopenia                                   |          | FP     | HP:0000979 | Purpura                               |          | FP     |
| HP:0003002 | Breast carcinoma                              |          | FP     | HP:0011951 | Aspiration pneumonia                  |          | FP     |
| HP:0001041 | Facial erythema                               | 17215624 | TP     | HP:0001973 | Autoimmune thrombocytopenia           |          | FP     |
| HP:0100537 | Fasciitis                                     | 15197005 | TP     | HP:0003457 | EMG abnormality                       | 15693592 | TP     |
| HP:0011123 | Inflammatory abnormality of the skin          |          | FP     | HP:0002955 | Granulomatosis                        |          | FP     |
| HP:0007417 | Discoid lupus erythematosus                   |          | FP     | HP:0007354 | Amyotrophic lateral sclerosis         |          | FP     |
| HP:0002721 | Immunodeficiency                              |          | FP     | HP:0009073 | Progressive proximal muscle weakness  | 16132164 | TP     |
| HP:0009125 | Lipodystrophy                                 | 22044089 | TP     | HP:0001482 | Subcutaneous nodules                  |          | FP     |
| HP:0003324 | Generalized muscle weakness                   | 16866067 | TP     | HP:0003713 | Muscle fiber necrosis                 | 1423335  | TP     |
| HP:0000951 | Abnormality of the skin                       |          | FP     | HP:0200029 | Vasculitis in the skin                | 18981641 | TP     |
| HP:0002092 | Pulmonary hypertension                        |          | FP     | HP:0007618 | Subcutaneous calcification            | 8687325  | TP     |
| HP:0100646 | Thyroiditis                                   |          | FP     | HP:0001596 | Alopecia                              | 23112358 | TP     |
| HP:0002875 | Exertional dyspnea                            |          | FP     | HP:0002835 | Aspiration                            |          | FP     |
| HP:0001289 | Confusion                                     |          | FP     | HP:0003750 | Increased muscle fatiguability        | 17907213 | TP     |
| HP:0003259 | Increased creatinine                          |          | FP     | HP:0002027 | Abdominal pain                        |          | FP     |
| HP:0000998 | Hypertrichosis                                |          | FP     | HP:0011675 | Arrhythmia                            |          | FP     |
| HP:0002613 | Biliary cirrhosis                             |          | FP     | HP:0001271 | Polyneuropathy                        |          | FP     |

*continued on the next page*

**Table S10. Dermatomyositis – continued**

| ID         | Name                                    | pmid                 | status | ID         | Name                                             | pmid     | status |
|------------|-----------------------------------------|----------------------|--------|------------|--------------------------------------------------|----------|--------|
| HP:0003565 | Elevated erythrocyte sedimentation rate | 2334184              | TP     | HP:0002107 | Pneumothorax                                     |          | FP     |
| HP:0000083 | Renal insufficiency                     |                      | FP     | HP:0002747 | Respiratory insufficiency due to muscle weakness | 16386077 | TP     |
| HP:0000093 | Proteinuria                             |                      | FP     | HP:0001824 | Weight loss                                      |          | FP     |
| HP:0001618 | Dysphonia                               | 23042610<br>16467366 | TP     | HP:0001047 | Atopic dermatitis                                |          | FP     |
| HP:0000939 | Osteoporosis                            |                      | FP     | HP:0001903 | Anemia                                           |          | FP     |
| HP:0001880 | Eosinophilia                            |                      | FP     | HP:0005523 | Lymphoproliferative disorder                     |          | FP     |
| HP:0003756 | Skeletal myopathy                       | 15196172             | TP     | HP:0001878 | Hemolytic anemia                                 |          | FP     |
| HP:0010702 | Hypergammaglobulinemia                  |                      | FP     | HP:0007269 | Spinal muscular atrophy                          |          | FP     |
| HP:0006532 | Recurrent pneumonia                     |                      | FP     | HP:0002098 | Respiratory distress                             |          | FP     |
| HP:0003700 | Generalized amyotrophy                  |                      | FP     | HP:0002863 | Myelodysplasia                                   |          | FP     |
| HP:0006775 | Multiple myeloma                        |                      | FP     | HP:0004432 | Agammaglobulinemia                               |          | FP     |
| HP:0004313 | Hypogammaglobulinemia                   |                      | FP     | HP:0003458 | EMG: myopathic abnormalities                     |          | FP     |
| HP:0003715 | Myofibrillar myopathy                   |                      | FP     | HP:0001597 | Abnormality of the nail                          |          | FP     |
| HP:0008942 | Acute rhabdomyolysis                    |                      | FP     | HP:0000158 | Macroglossia                                     |          | FP     |
| HP:0002249 | Melena                                  |                      | FP     | HP:0005781 | Contractures of the large joints                 |          | FP     |
| HP:0007126 | Proximal amyotrophy                     |                      | FP     | HP:0100540 | Palpebral edema                                  | 12325332 | FN     |
| HP:0100295 | Muscle fiber atrophy                    | 23112358             | FN     | HP:0002460 | Distal muscle weakness                           | 18203322 | FN     |
| HP:0002792 | Reduced vital capacity                  | 15692974             | FN     | HP:0100578 | Lipoatrophy                                      | 8436656  | FN     |
| HP:0003546 | Exercise intolerance                    | 21106107             | FN     | HP:0002923 | Rheumatoid factor positive                       | 6965409  | FN     |
| HP:0001685 | Myocardial fibrosis                     | 4081664              | FN     | HP:0002102 | Pleuritis                                        | 3813671  | FN     |
| HP:0000962 | Hyperkeratosis                          | 17215624             | FN     | HP:0003453 | Antineutrophil antibody positivity               | 21812362 | FN     |
| HP:0008064 | Ichthyosiform abnormality of the skin   | 22515579             | FN     | HP:0001701 | Pericarditis                                     | 8444002  | FN     |
| HP:0010766 | Ectopic calcification                   | 18448482             | FN     | HP:0002960 | Autoimmunity                                     | 23117947 | FN     |
| HP:0100249 | Calcification of muscles                | 8814715              | FN     | HP:0200044 | Porokeratosis                                    | 17173828 | FN     |
| HP:0000965 | Cutis marmorata                         | 9731966<br>1845403   | FN     | HP:0001019 | Erythroderma                                     | 8814715  | FN     |



**Table S11.** Overview of HPO annotations for **Osteoporosis** that were derived by concept recognition in PubMed using BioLark. There were 18 true positives, 109 false positives, and 14 false negatives.

| ID         | Name                                  | pmid                                                     | status | ID         | Name                                  | pmid     | status |
|------------|---------------------------------------|----------------------------------------------------------|--------|------------|---------------------------------------|----------|--------|
| HP:0000939 | Osteoporosis                          | 6918601                                                  | TP     | HP:0000938 | Osteopenia                            | 10531790 | TP     |
| HP:0002757 | Recurrent fractures                   | 10100933<br>15560040<br>21394493<br>12810179<br>12815335 | TP     | HP:0005897 | Severe osteoporosis                   | -        | TP     |
| HP:0002953 | Vertebral compression fractures       | 7083689                                                  | TP     | HP:0011001 | Increased bone mineral density        |          | FP     |
| HP:0002527 | Falls                                 |                                                          | FP     | HP:0002797 | Osteolysis                            |          | FP     |
| HP:0002659 | Increased susceptibility to fractures | 11866149                                                 | TP     | HP:0001370 | Rheumatoid arthritis                  |          | FP     |
| HP:0100512 | Vitamin D deficiency                  |                                                          | FP     | HP:0002749 | Osteomalacia                          | -        | TP     |
| HP:0000135 | Hypogonadism                          |                                                          | FP     | HP:0010885 | Aseptic necrosis                      |          | FP     |
| HP:0003418 | Back pain                             | 10197021                                                 | TP     | HP:0002756 | Pathologic fracture                   |          | FP     |
| HP:0002758 | Osteoarthritis                        |                                                          | FP     | HP:0000867 | Secondary hyperparathyroidism         |          | FP     |
| HP:0003002 | Breast carcinoma                      |                                                          | FP     | HP:0003072 | Hypercalcemia                         |          | FP     |
| HP:0001324 | Muscle weakness                       |                                                          | FP     | HP:0002808 | Kyphosis                              | 19640824 | TP     |
| HP:0100787 | Prostate neoplasm                     |                                                          | FP     | HP:0001513 | Obesity                               |          | FP     |
| HP:0002150 | Hypercalciuria                        |                                                          | FP     | HP:0004325 | Decreased body weight                 |          | FP     |
| HP:0008200 | Primary hyperparathyroidism           |                                                          | FP     | HP:0002037 | Inflammation of the large intestine   |          | FP     |
| HP:0000819 | Diabetes mellitus                     |                                                          | FP     | HP:0003978 | Fractured radius                      | 7083689  | TP     |
| HP:0000141 | Amenorrhea                            |                                                          | FP     | HP:0000843 | Hyperparathyroidism                   |          | FP     |
| HP:0002653 | Bone pain                             |                                                          | FP     | HP:0002024 | Malabsorption                         |          | FP     |
| HP:0002039 | Anorexia                              |                                                          | FP     | HP:0004395 | Malnutrition                          |          | FP     |
| HP:0001824 | Weight loss                           |                                                          | FP     | HP:0000822 | Hypertension                          |          | FP     |
| HP:0100646 | Thyroiditis                           |                                                          | FP     | HP:0100280 | Crohn's disease                       |          | FP     |
| HP:0006775 | Multiple myeloma                      |                                                          | FP     | HP:0000836 | Hyperthyroidism                       |          | FP     |
| HP:0007354 | Amyotrophic lateral sclerosis         |                                                          | FP     | HP:0000704 | Periodontitis                         |          | FP     |
| HP:0001297 | Stroke                                |                                                          | FP     | HP:0003419 | Low back pain                         | 22338309 | TP     |
| HP:0001578 | Hypercortisolism                      |                                                          | FP     | HP:0006510 | Chronic obstructive pulmonary disease |          | FP     |
| HP:0002901 | Hypocalcemia                          |                                                          | FP     | HP:0002621 | Atherosclerosis                       |          | FP     |
| HP:0008443 | Spinal deformities                    |                                                          | FP     | HP:0002608 | Celiac disease                        |          | FP     |
| HP:0005625 | Osteoporosis of vertebrae             | -                                                        | TP     | HP:0002099 | Asthma                                |          | FP     |
| HP:0000969 | Edema                                 |                                                          | FP     | HP:0003155 | Elevated alkaline phosphatase         | 7083689  | TP     |
| HP:0002960 | Autoimmunity                          |                                                          | FP     | HP:0002063 | Rigidity                              |          | FP     |
| HP:0000083 | Renal insufficiency                   |                                                          | FP     | HP:0002725 | Systemic lupus erythematosus          |          | FP     |
| HP:0000787 | Nephrolithiasis                       |                                                          | FP     | HP:0003774 | End stage renal disease               |          | FP     |
| HP:0003869 | Cortical thinning (humeral)           | 1281535                                                  | TP     | HP:0100279 | Ulcerative colitis                    |          | FP     |
| HP:0001903 | Anemia                                |                                                          | FP     | HP:0001510 | Growth delay                          |          | FP     |
| HP:0008422 | Vertebral wedging                     | 18395504                                                 | TP     | HP:0004324 | Increased body weight                 |          | FP     |
| HP:0002613 | Biliary cirrhosis                     |                                                          | FP     | HP:0004934 | Vascular calcification                |          | FP     |
| HP:0003077 | Hyperlipidemia                        |                                                          | FP     | HP:0004349 | Reduced bone mineral density          | 16265206 | TP     |
| HP:0001289 | Confusion                             |                                                          | FP     | HP:0001394 | Cirrhosis                             |          | FP     |
| HP:0004789 | Lactose intolerance                   |                                                          | FP     | HP:0000726 | Dementia                              |          | FP     |
| HP:0100495 | Mastocytosis                          |                                                          | FP     | HP:0001250 | Seizures                              |          | FP     |
| HP:0000870 | Prolactin excess                      |                                                          | FP     | HP:0000855 | Insulin resistance                    |          | FP     |
| HP:0000024 | Prostatitis                           |                                                          | FP     | HP:0002511 | Alzheimer disease                     |          | FP     |
| HP:0000718 | Aggressive behavior                   |                                                          | FP     | HP:0001907 | Thromboembolism                       |          | FP     |
| HP:0000829 | Hypoparathyroidism                    |                                                          | FP     | HP:0004322 | Short stature                         |          | FP     |
| HP:0000708 | Behavioural/Psychiatric Abnormality   |                                                          | FP     | HP:0003202 | Amyotrophy                            |          | FP     |
| HP:0000821 | Hypothyroidism                        |                                                          | FP     | HP:0001635 | Congestive heart failure              |          | FP     |
| HP:0000740 | Anxiety (with pheochromocytoma)       |                                                          | FP     | HP:0003470 | Paralysis                             |          | FP     |
| HP:0001300 | Parkinsonism                          |                                                          | FP     | HP:0003259 | Increased creatinine                  |          | FP     |
| HP:0002611 | Cholestatic liver disease             |                                                          | FP     | HP:0100544 | Neoplasm of the heart                 |          | FP     |
| HP:0000737 | Irritability                          |                                                          | FP     | HP:0000823 | Delayed puberty                       |          | FP     |
| HP:0100543 | Cognitive impairment                  |                                                          | FP     | HP:0000026 | Male hypogonadism                     |          | FP     |
| HP:0100753 | Schizophrenia                         |                                                          | FP     | HP:0000824 | Growth hormone deficiency             |          | FP     |

*continued on the next page*

Table S11. Osteoporosis – continued

| ID         | Name                             | pmid               | status | ID         | Name                        | pmid     | status |
|------------|----------------------------------|--------------------|--------|------------|-----------------------------|----------|--------|
| HP:0002204 | Pulmonary embolism               |                    | FP     | HP:0001249 | Intellectual disability     |          | FP     |
| HP:0010550 | Paraplegia                       |                    | FP     | HP:0003003 | Colon cancer                |          | FP     |
| HP:0000820 | Abnormality of the thyroid gland |                    | FP     | HP:0000789 | Infertility                 |          | FP     |
| HP:0001658 | Myocardial infarction            |                    | FP     | HP:0003765 | Psoriasis                   |          | FP     |
| HP:0000786 | Primary amenorrhea               |                    | FP     | HP:0000845 | Growth hormone excess       |          | FP     |
| HP:0100021 | Cerebral palsy                   |                    | FP     | HP:0009830 | Peripheral neuropathy       |          | FP     |
| HP:0006528 | Chronic lung disease             |                    | FP     | HP:0011986 | Ectopic ossification        |          | FP     |
| HP:0002665 | Lymphoma                         |                    | FP     | HP:0001909 | Leukemia                    |          | FP     |
| HP:0002097 | Emphysema                        |                    | FP     | HP:0006536 | Obstructive lung disease    |          | FP     |
| HP:0002206 | Pulmonary fibrosis               |                    | FP     | HP:0002092 | Pulmonary hypertension      |          | FP     |
| HP:0006530 | Interstitial pulmonary disease   |                    | FP     | HP:0004936 | Venous thrombosis           |          | FP     |
| HP:0100036 | Pseudo-fractures                 | 4036121            | TP     | HP:0002863 | Myelodysplasia              |          | FP     |
| HP:0002752 | Sparse bone trabeculae           | 18299223           | TP     | HP:0004586 | Biconcave vertebral bodies  | 3659378  | FN     |
| HP:0003876 | Osteoporotic humerus             | 7083689            | FN     | HP:0003080 | Hydroxyprolinuria           | 1887826  | FN     |
| HP:0008428 | Vertebral clefting               | 16091506           | FN     | HP:0004568 | Beaking of vertebral bodies | 25069705 | FN     |
| HP:0003282 | Low alkaline phosphatase         | 9116389<br>8695849 | FN     | HP:0004591 | Disc-like vertebral bodies  | 9548357  | FN     |
| HP:0003987 | Fractured ulna                   | 7083689            | FN     | HP:0002355 | Difficulty walking          | 9458225  | FN     |
| HP:0003084 | Fractures of the long bones      | 7083689            | FN     | HP:0003302 | Spondylolisthesis           | 11458155 | FN     |
| HP:0006640 | Multiple rib fractures           | 16582522           | FN     | HP:0004699 | Osteoporotic metatarsal     | 20681355 | FN     |
| HP:0003964 | Osteoporotic forearm bones       | 1527750            | FN     |            |                             |          |        |

**Table S12.** Overview of HPO annotations for **Rickets** that were derived by concept recognition in PubMed using BioLark. There were 20 true positives, 46 false positives, and 13 false negatives.

| ID         | Name                                  | pmid     | status | ID         | Name                                           | pmid     | status |
|------------|---------------------------------------|----------|--------|------------|------------------------------------------------|----------|--------|
| HP:0002748 | Rickets                               | 23374621 | TP     | HP:0100512 | Vitamin D deficiency                           |          | FP     |
| HP:0002749 | Osteomalacia                          | 23374621 | TP     | HP:0004912 | Hypophosphatemic rickets                       |          | FP     |
| HP:0002901 | Hypocalcemia                          | 23374621 | TP     | HP:0002148 | Hypophosphatemia                               | 23374621 | TP     |
| HP:0003155 | Elevated alkaline phosphatase         | 23374621 | TP     | HP:0000938 | Osteopenia                                     |          | FP     |
| HP:0001510 | Growth delay                          | 23374621 | TP     | HP:0004395 | Malnutrition                                   |          | FP     |
| HP:0000939 | Osteoporosis                          |          | FP     | HP:0002150 | Hypercalciuria                                 | 23374621 | TP     |
| HP:0001250 | Seizures                              |          | FP     | HP:0000121 | Nephrocalcinosis                               |          | FP     |
| HP:0003072 | Hypercalcemia                         |          | FP     | HP:0001518 | Small for gestational age                      |          | FP     |
| HP:0002979 | Bowing of the legs                    | 23374621 | TP     | HP:0002970 | Genu varum                                     | 23374621 | TP     |
| HP:0002024 | Malabsorption                         |          | FP     | HP:0001596 | Alopecia                                       |          | FP     |
| HP:0004322 | Short stature                         | 20926527 | TP     | HP:0000843 | Hyperparathyroidism                            |          | FP     |
| HP:0002857 | Genu valgum                           | 23374621 | TP     | HP:0002199 | Hypocalcemic seizures                          | 12812706 | TP     |
| HP:0000829 | Hypoparathyroidism                    |          | FP     | HP:0002905 | Hyperphosphatemia                              |          | FP     |
| HP:0001324 | Muscle weakness                       |          | FP     | HP:0000117 | Decreased renal tubular phosphate reabsorption | 1755097  | TP     |
| HP:0011002 | Osteopetrosis                         |          | FP     | HP:0002653 | Bone pain                                      | 23374621 | TP     |
| HP:0001281 | Tetany                                | 23374621 | TP     | HP:0000852 | Pseudohypoparathyroidism                       |          | FP     |
| HP:0001508 | Failure to thrive                     |          | FP     | HP:0003109 | Hyperphosphaturia                              |          | FP     |
| HP:0002756 | Pathologic fracture                   |          | FP     | HP:0000897 | Rachitic rosary                                | 23151726 | TP     |
| HP:0001903 | Anemia                                |          | FP     | HP:0001000 | Abnormality of skin pigmentation               |          | FP     |
| HP:0003021 | Metaphyseal cupping                   | 23151726 | TP     | HP:0001947 | Renal tubular acidosis                         |          | FP     |
| HP:0003472 | Hypocalcemic tetany                   | 12812706 | TP     | HP:0100593 | Calcification of cartilage                     |          | FP     |
| HP:0003020 | Enlargement of the wrists             | 21767417 | TP     | HP:0002757 | Recurrent fractures                            | 23374621 | TP     |
| HP:0002814 | Abnormality of the lower limb         |          | FP     | HP:0011001 | Increased bone mineral density                 |          | FP     |
| HP:0001622 | Premature birth                       |          | FP     | HP:0005912 | Biliary atresia                                |          | FP     |
| HP:0100511 | Abnormality of vitamin D metabolism   |          | FP     | HP:0000787 | Nephrolithiasis                                |          | FP     |
| HP:0003355 | Aminoaciduria                         |          | FP     | HP:0003076 | Glycosuria                                     |          | FP     |
| HP:0003126 | Low-molecular-weight proteinuria      |          | FP     | HP:0003282 | Low alkaline phosphatase                       |          | FP     |
| HP:0006463 | Rickets of the lower limbs            |          | FP     | HP:0001942 | Metabolic acidosis                             |          | FP     |
| HP:0001840 | Metatarsus adductus                   |          | FP     | HP:0001225 | Wrist swelling                                 |          | FP     |
| HP:0001949 | Hypokalemic alkalosis                 |          | FP     | HP:0003987 | Fractured ulna                                 |          | FP     |
| HP:0003236 | Elevated serum creatine phosphokinase |          | FP     | HP:0006409 | Progressive leg bowing                         |          | FP     |
| HP:0000945 | Flared irregular metaphyses           |          | FP     | HP:0003029 | Enlargement of the ankles                      |          | FP     |
| HP:0003215 | Dicarboxylic aciduria                 |          | FP     | HP:0002986 | Radial bowing                                  |          | FP     |
| HP:0002007 | Frontal bossing                       | 19576150 | FN     | HP:0008208 | Parathyroid hyperplasia                        | 23374621 | FN     |
| HP:0003084 | Fractures of the long bones           | 23374621 | FN     | HP:0009763 | Limb pain                                      | 23374621 | FN     |
| HP:0002829 | Arthralgia                            | 20418553 | FN     | HP:0001288 | Gait disturbance                               | 8699350  | FN     |
| HP:0006487 | Bowing of the long bones              | 7419691  | FN     | HP:0000920 | Enlargement of the costochondral junction      | 23220549 | FN     |
| HP:0008732 | Renal hypophosphatemia                | 2983252  | FN     | HP:0003016 | Metaphyseal widening                           | 21795457 | FN     |
| HP:0002355 | Difficulty walking                    | 19576150 | FN     | HP:0005897 | Severe osteoporosis                            | 8250499  | FN     |
| HP:0002659 | Increased susceptibility to fractures | 23374621 | FN     |            |                                                |          |        |

**Table S13.** Overview of HPO annotations for **Lepromatous Leprosy** that were derived by concept recognition in PubMed using BioLark. There were 46 true positives, 33 false positives, and 46 false negatives.

| ID         | Name                                 | pmid                                     | status | ID         | Name                                | pmid                 | status |
|------------|--------------------------------------|------------------------------------------|--------|------------|-------------------------------------|----------------------|--------|
| HP:0010783 | Erythema                             | 18627717                                 | TP     | HP:0009830 | Peripheral neuropathy               | 1802936              | TP     |
| HP:0002633 | Vasculitis                           | 10347568                                 | TP     | HP:0001945 | Fever                               | 9522583              | TP     |
| HP:0200036 | Skin nodule                          | 18313706                                 | TP     | HP:0200042 | Skin ulcer                          | 16638386             | TP     |
| HP:0000656 | Ectropion                            | 12831146                                 | TP     | HP:0002835 | Aspiration                          |                      | FP     |
| HP:0002527 | Falls                                |                                          | FP     | HP:0001324 | Muscle weakness                     |                      | FP     |
| HP:0000969 | Edema                                | 24770495                                 | TP     | HP:0001482 | Subcutaneous nodules                | 2119410              | TP     |
| HP:0002721 | Immunodeficiency                     |                                          | FP     | HP:0001128 | Trichiasis                          | 12831146             | TP     |
| HP:0100699 | Scarring                             | 24770495                                 | TP     | HP:0000246 | Sinusitis                           | 5169808              | TP     |
| HP:0000518 | Cataract                             | 2657299<br>12446359                      | TP     | HP:0002960 | Autoimmunity                        |                      | FP     |
| HP:0002716 | Lymphadenopathy                      | 15881039                                 | TP     | HP:0008066 | Abnormal blistering of the skin     | 9747246              | TP     |
| HP:0003474 | Sensory impairment                   | 10700912                                 | TP     | HP:0002719 | Recurrent infections                |                      | FP     |
| HP:0100608 | Metrorrhagia                         |                                          | FP     | HP:0006775 | Multiple myeloma                    |                      | FP     |
| HP:0003470 | Paralysis                            |                                          | FP     | HP:0001094 | Iridocyclitis                       | 1995040              | TP     |
| HP:0007354 | Amyotrophic lateral sclerosis        |                                          | FP     | HP:0011096 | Peripheral demyelination            | 2852213              | TP     |
| HP:0003613 | Antiphospholipid antibody positivity | 1669564                                  | TP     | HP:0011107 | Recurrent aphthous stomatitis       |                      | FP     |
| HP:0000975 | Hyperhidrosis                        |                                          | FP     | HP:0000988 | Skin rash                           | 17551381             | TP     |
| HP:0001903 | Anemia                               | 1402625                                  | TP     | HP:0007759 | Opacification of the corneal stroma | 2657299              | TP     |
| HP:0002840 | Lymphadenitis                        | 15881039                                 | TP     | HP:0001045 | Vitiligo                            | 11123444             | TP     |
| HP:0001019 | Erythroderma                         |                                          | FP     | HP:0001000 | Abnormality of skin pigmentation    | 16044817             | TP     |
| HP:0001089 | Iris atrophy                         | 12831146                                 | TP     | HP:0000554 | Uveitis                             | 9524032              | TP     |
| HP:0000999 | Pyoderma                             |                                          | FP     | HP:0011859 | Punctate keratitis                  | 12831146             | TP     |
| HP:0001075 | Atrophic scars                       | 15282970                                 | TP     | HP:0000964 | Eczema                              |                      | FP     |
| HP:0000491 | Keratitis                            | 9524032                                  | TP     | HP:0002019 | Constipation                        |                      | FP     |
| HP:0000718 | Aggressive behavior                  |                                          | FP     | HP:0001271 | Polyneuropathy                      | 22270208<br>10432812 | TP     |
| HP:0001101 | Iritis                               | 8862265                                  | TP     | HP:0001369 | Arthritis                           | 17976874             | TP     |
| HP:0100532 | Scleritis                            | 11967738                                 | TP     | HP:0002665 | Lymphoma                            |                      | FP     |
| HP:0002725 | Systemic lupus erythematosus         |                                          | FP     | HP:0001067 | Neurofibromas                       |                      | FP     |
| HP:0003447 | Axonal loss                          | 14506718                                 | TP     | HP:0100726 | Kaposi's sarcoma                    |                      | FP     |
| HP:0002860 | Squamous cell carcinoma              | 1787225<br>8089361<br>3198958<br>3198959 | TP     | HP:0000951 | Abnormality of the skin             |                      | FP     |
| HP:0000099 | Glomerulonephritis                   | 2496359                                  | TP     | HP:0011873 | Abnormal platelet count             | 22607288<br>9782435  | TP     |
| HP:0002459 | Dysautonomia                         | 2358707                                  | TP     | HP:0001171 | Ectrodactyly (hands)                |                      | FP     |
| HP:0011120 | Saddle nose                          | 22170033                                 | TP     | HP:0004326 | Cachexia                            |                      | FP     |
| HP:0002102 | Pleuritis                            | 18567421<br>9147904                      | TP     | HP:0003401 | Paresthesia                         | 19603298             | TP     |
| HP:0003365 | Arthralgia of the hip                |                                          | FP     | HP:0000621 | Entropion                           |                      | FP     |
| HP:0002829 | Arthralgia                           | 16638426                                 | TP     | HP:0001581 | Recurrent skin infections           |                      | FP     |
| HP:0000798 | Oligospermia                         |                                          | FP     | HP:0000027 | Azoospermia                         | 7921941              | TP     |

*continued on the next page*

**Table S13. Lepromatous Leprosy – continued**

| ID         | Name                                    | pmid                             | status | ID         | Name                                 | pmid                 | status |
|------------|-----------------------------------------|----------------------------------|--------|------------|--------------------------------------|----------------------|--------|
| HP:0001917 | Renal amyloidosis                       | 2496359                          | TP     | HP:0001289 | Confusion                            |                      | FP     |
| HP:0001262 | Somnolence                              |                                  | FP     | HP:0000421 | Epistaxis                            | 9133791<br>21938685  | TP     |
| HP:0009829 | Phocomelia                              |                                  | FP     | HP:0001059 | Pterygia                             |                      | FP     |
| HP:0001055 | Erysipelas                              |                                  | FP     | HP:0000509 | Conjunctivitis                       | 3508760              | FN     |
| HP:0002625 | Deep venous thrombosis                  | 22607288                         | FN     | HP:0001824 | Weight loss                          | 2707215              | FN     |
| HP:0100646 | Thyroiditis                             | 17120512                         | FN     | HP:0000135 | Hypogonadism                         | 23235783             | FN     |
| HP:0010628 | Facial palsy                            | 9251588                          | FN     | HP:0001882 | Leukopenia                           | 1947478              | FN     |
| HP:0001596 | Alopecia                                | 15677976<br>15022902<br>23174494 | FN     | HP:0011034 | Amyloidosis                          | 3223746              | FN     |
| HP:0000789 | Infertility                             | 12914132<br>7921941              | FN     | HP:0000221 | Furrowed tongue                      | 1431321<br>8425797   | FN     |
| HP:0009831 | Mononeuropathy                          | 14750581<br>2624076              | FN     | HP:0100495 | Mastocytosis                         | 3880309<br>15022902  | FN     |
| HP:0000771 | Gynecomastia                            | 2262715<br>7921941               | FN     | HP:0000495 | Recurrent corneal erosions           | 2657299<br>10396193  | FN     |
| HP:0000389 | Chronic otitis media                    | 2086677                          | FN     | HP:0003651 | Foam cells                           | 15056385             | FN     |
| HP:0001010 | Hypopigmentation of the skin            | 8532702                          | FN     | HP:0003453 | Antineutrophil antibody positivity   | 10347568             | FN     |
| HP:0003493 | Antinuclear antibody positivity         | 10347568                         | FN     | HP:0001025 | Urticaria                            | 15835607<br>17511942 | FN     |
| HP:0001876 | Pancytopenia                            | 24171241                         | FN     | HP:0000979 | Purpura                              | 3275072              | FN     |
| HP:0000802 | Impotence                               | 2358707<br>18075988              | FN     | HP:0003202 | Amyotrophy                           | 15581032             | FN     |
| HP:0001919 | Acute renal failure                     | 3268517                          | FN     | HP:0001291 | Abnormality of the cranial nerves    | 9251586              | FN     |
| HP:0000501 | Glaucoma                                | 22607288<br>9782435              | FN     | HP:0001873 | Thrombocytopenia                     | 24171241             | FN     |
| HP:0000365 | Hearing impairment                      | 7714350                          | FN     | HP:0011123 | Inflammatory abnormality of the skin | 23133681             | FN     |
| HP:0000199 | Tongue nodules                          | 8425797                          | FN     | HP:0011469 | Nasal regurgitation                  | 8942155              | FN     |
| HP:0001982 | Sea-blue histiocytosis                  | 16961654                         | FN     | HP:0001063 | Acrocyanosis                         | 8745686              | FN     |
| HP:0200034 | Skin papules                            | 16650172                         | FN     | HP:0200035 | skin plaques                         | 16008652             | FN     |
| HP:0000649 | Abnormality of vision evoked potentials | 9251586                          | FN     | HP:0002293 | Alopecia of scalp                    | 9503871              | FN     |
| HP:0007178 | Motor polyneuropathy                    | 18075988                         | FN     | HP:0000029 | Testicular atrophy                   | 7921941              | FN     |
| HP:0100686 | Enthesitis                              | 8782134                          | FN     | HP:0006480 | Premature loss of teeth              | 17072249             | FN     |
| HP:0100778 | Cryoglobulinemia                        | 11309832                         | FN     | HP:0000093 | Proteinuria                          | 2496359              | FN     |
| HP:0011355 | Localized skin lesion                   | 1807258                          | FN     |            |                                      |                      |        |

**Table S14.** Overview of HPO annotations for **Dirofilariasis** that were derived by concept recognition in PubMed using BioLark. There were 11 true positives, 47 false positives, and 17 false negatives.

| ID         | Name                                     | pmid               | status | ID         | Name                                           | pmid               | status |
|------------|------------------------------------------|--------------------|--------|------------|------------------------------------------------|--------------------|--------|
| HP:0001482 | Subcutaneous nodules                     | 23776842           | TP     | HP:0001807 | Ridged nail                                    |                    | FP     |
| HP:0001880 | Eosinophilia                             | 9754010            | TP     | HP:0002092 | Pulmonary hypertension                         |                    | FP     |
| HP:0002580 | Volvulus                                 |                    | FP     | HP:0006532 | Recurrent pneumonia                            |                    | FP     |
| HP:0002204 | Pulmonary embolism                       | 9531965            | TP     | HP:0001324 | Muscle weakness                                |                    | FP     |
| HP:0001907 | Thromboembolism                          |                    | FP     | HP:0002719 | Recurrent infections                           |                    | FP     |
| HP:0002094 | Dyspnea                                  |                    | FP     | HP:0000989 | Pruritus                                       | 477322<br>18322771 | TP     |
| HP:0000969 | Edema                                    | 17176413           | TP     | HP:0001635 | Congestive heart failure                       |                    | FP     |
| HP:0100608 | Metrorrhagia                             |                    | FP     | HP:0000964 | Eczema                                         |                    | FP     |
| HP:0001541 | Ascites                                  |                    | FP     | HP:0002090 | Pneumonia                                      |                    | FP     |
| HP:0000099 | Glomerulonephritis                       |                    | FP     | HP:0004325 | Decreased body weight                          |                    | FP     |
| HP:0002202 | Pleural effusion                         | 1926037            | TP     | HP:0004722 | Thickening of the glomerular basement membrane |                    | FP     |
| HP:0003641 | Hemoglobinuria                           |                    | FP     | HP:0001903 | Anemia                                         |                    | FP     |
| HP:0100526 | Neoplasm of the lungs                    |                    | FP     | HP:0010783 | Erythema                                       |                    | FP     |
| HP:0002586 | Peritonitis                              | 8244870<br>1327358 | TP     | HP:0002527 | Falls                                          |                    | FP     |
| HP:0001596 | Alopecia                                 |                    | FP     | HP:0003712 | Muscle hypertrophy                             |                    | FP     |
| HP:0100760 | Clubbing of toes                         |                    | FP     | HP:0001289 | Confusion                                      |                    | FP     |
| HP:0010310 | Chylothorax                              |                    | FP     | HP:0002108 | Spontaneous pneumothorax                       |                    | FP     |
| HP:0000789 | Infertility                              |                    | FP     | HP:0100845 | Anaphylactic shock                             |                    | FP     |
| HP:0002013 | Vomiting                                 |                    | FP     | HP:0100749 | Chest pain                                     | 12822426           | TP     |
| HP:0000505 | Visual impairment                        |                    | FP     | HP:0008222 | Female infertility                             |                    | FP     |
| HP:0200036 | Skin nodule                              | 19127968           | TP     | HP:0006530 | Interstitial pulmonary disease                 |                    | FP     |
| HP:0100770 | Hyperperistalsis                         |                    | FP     | HP:0002039 | Anorexia                                       |                    | FP     |
| HP:0010444 | Pulmonary insufficiency                  |                    | FP     | HP:0001279 | Syncope                                        |                    | FP     |
| HP:0001945 | Fever                                    | 9022330            | TP     | HP:0001909 | Leukemia                                       |                    | FP     |
| HP:0000793 | Membranoproliferative glomerulonephritis |                    | FP     | HP:0001254 | Lethargy                                       |                    | FP     |
| HP:0100725 | Lichenification                          |                    | FP     | HP:0002113 | Pulmonary infiltrates                          | 12693088           | TP     |
| HP:0001257 | Spasticity                               |                    | FP     | HP:0000093 | Proteinuria                                    |                    | FP     |
| HP:0003256 | Abnormality of the coagulation cascade   |                    | FP     | HP:0004420 | Arterial thrombosis                            |                    | FP     |
| HP:0003573 | Increased total bilirubin                |                    | FP     | HP:0005521 | Disseminated intravascular coagulation         |                    | FP     |
| HP:0002105 | Hemoptysis                               | 2643558            | FN     | HP:0000520 | Proptosis                                      | 10094355           | FN     |
| HP:0002955 | Granulomatosis                           | 3616266            | FN     | HP:0002716 | Lymphadenopathy                                | 22915604           | FN     |
| HP:0100534 | Episcleritis                             | 7739879            | FN     | HP:0002840 | Lymphadenitis                                  | 3626438            | FN     |
| HP:0003095 | Septic arthritis                         | 3435572<br>3626438 | FN     | HP:0100750 | Atelectasis                                    | 12822426           | FN     |
| HP:0000651 | Diplopia                                 | 998706             | FN     | HP:0007734 | Enlarged lacrimal glands                       | 17440285           | FN     |
| HP:0100540 | Palpebral edema                          | 20653124           | FN     | HP:0010605 | Chalazion                                      | 11521439           | FN     |
| HP:0011921 | Exudative pleural effusion               | 12822426           | FN     | HP:0007879 | Allergic conjunctivitis                        | 11055226           | FN     |
| HP:0003212 | Increased IgE level                      | 9022330            | FN     | HP:0002875 | Exertional dyspnea                             | 9022330            | FN     |
| HP:0000508 | Ptosis                                   | 12213168           | FN     |            |                                                |                    |        |

**Table S15.** Overview of HPO annotations for **Opisthorchiasis** that were derived by concept recognition in PubMed using BioLark. There were 19 true positives, 21 false positives, and 14 false negatives.

| ID         | Name                          | pmid                 | status | ID         | Name                              | pmid                | status |
|------------|-------------------------------|----------------------|--------|------------|-----------------------------------|---------------------|--------|
| HP:0002240 | Hepatomegaly                  | 4095605              | TP     | HP:0001082 | Cholecystitis                     | 4095605             | TP     |
| HP:0003765 | Psoriasis                     | 15452616<br>12660845 | TP     | HP:0001081 | Cholelithiasis                    | 16768350            | TP     |
| HP:0001880 | Eosinophilia                  | 21938537             | TP     | HP:0001396 | Cholestasis                       | 21938537            | TP     |
| HP:0000952 | Jaundice                      | 4012543              | TP     | HP:0002719 | Recurrent infections              |                     | FP     |
| HP:0001394 | Cirrhosis                     |                      | FP     | HP:0002896 | Neoplasm of the liver             |                     | FP     |
| HP:0002321 | Vertigo                       |                      | FP     | HP:0003326 | Myalgia                           |                     | FP     |
| HP:0006560 | Biliary hyperplasia           | 2772709              | TP     | HP:0002027 | Abdominal pain                    | 21938537            | TP     |
| HP:0002018 | Nausea                        |                      | FP     | HP:0001733 | Pancreatitis                      | 19329217            | TP     |
| HP:0001945 | Fever                         | 4012543              | TP     | HP:0006562 | Viral hepatitis                   |                     | FP     |
| HP:0001402 | Hepatocellular carcinoma      | 21603286             | TP     | HP:0001324 | Muscle weakness                   |                     | FP     |
| HP:0002039 | Anorexia                      | 6542384              | TP     | HP:0003365 | Arthralgia of the hip             |                     | FP     |
| HP:0100523 | Liver abscess                 | 2558417              | TP     | HP:0002017 | Nausea and vomiting               |                     | FP     |
| HP:0002588 | Duodenal ulcer                | -                    | TP     | HP:0001408 | Bile duct proliferation           | 2772709             | TP     |
| HP:0003573 | Increased total bilirubin     |                      | FP     | HP:0002329 | Drowsiness                        |                     | FP     |
| HP:0002527 | Falls                         |                      | FP     | HP:0000099 | Glomerulonephritis                |                     | FP     |
| HP:0002592 | Gastric ulcer                 |                      | FP     | HP:0005609 | Gallbladder dysfunction           | 6542384             | TP     |
| HP:0000737 | Irritability                  |                      | FP     | HP:0005231 | Chronic gastritis                 | 15484977            | TP     |
| HP:0002024 | Malabsorption                 | 2727922              | TP     | HP:0003075 | Hypoproteinemia                   |                     | FP     |
| HP:0002375 | Hypokinesia                   |                      | FP     | HP:0011227 | Elevated C-reactive protein level |                     | FP     |
| HP:0001406 | Intrahepatic cholestasis      |                      | FP     | HP:0003394 | Muscle cramps                     |                     | FP     |
| HP:0002613 | Biliary cirrhosis             | 19329217             | FN     | HP:0001824 | Weight loss                       | 1544352<br>6542384  | FN     |
| HP:0005230 | Biliary tract obstruction     | 6542384              | FN     | HP:0001407 | Hepatic cysts                     | 1803102<br>18725803 | FN     |
| HP:0003155 | Elevated alkaline phosphatase | 14574844<br>4095605  | FN     | HP:0002605 | Hepatic necrosis                  | 14574844            | FN     |
| HP:0100724 | Hypercoagulability            | 19202620<br>21932543 | FN     | HP:0006559 | Hepatic calcification             | 18725803            | FN     |
| HP:0011900 | Hypofibrinogenemia            | 21932543             | FN     | HP:0006580 | Portal fibrosis                   | 6542384             | FN     |
| HP:0002630 | Fat malabsorption             | 20873180             | FN     | HP:0003073 | Hypoalbuminemia                   | 4095605             | FN     |
| HP:0002904 | Hyperbilirubinemia            | 4095605              | FN     | HP:0002910 | Elevated hepatic transaminases    | 4095605             | FN     |

**Table S16.** Overview of HPO annotations for **Croup** that were derived by concept recognition in PubMed using BioLark. There were 13 true positives, 13 false positives, and 24 false negatives.

| ID         | Name                                         | pmid     | status | ID         | Name                                               | pmid     | status |
|------------|----------------------------------------------|----------|--------|------------|----------------------------------------------------|----------|--------|
| HP:0010307 | Stridor                                      | 9451322  | TP     | HP:0002781 | Upper airway obstruction                           | 9445317  | TP     |
| HP:0011950 | Bronchiolitis                                |          | FP     | HP:0002099 | Asthma                                             |          | FP     |
| HP:0005348 | Inspiratory stridor                          | 18646444 | TP     | HP:0002098 | Respiratory distress                               | 6386967  | TP     |
| HP:0002090 | Pneumonia                                    |          | FP     | HP:0011947 | Respiratory tract infection                        | 21249651 | TP     |
| HP:0002783 | Recurrent lower respiratory tract infections |          | FP     | HP:0002835 | Aspiration                                         |          | FP     |
| HP:0001609 | Hoarse voice                                 | 18646444 | TP     | HP:0001607 | Subglottic stenosis                                | 21493242 | TP     |
| HP:0005945 | Laryngeal obstruction                        | 15523420 | TP     | HP:0001945 | Fever                                              | 10910624 | TP     |
| HP:0000961 | Cyanosis                                     | 6386967  | TP     | HP:0000969 | Edema                                              |          | FP     |
| HP:0001601 | Laryngomalacia                               |          | FP     | HP:0002527 | Falls                                              |          | FP     |
| HP:0002788 | Recurrent upper respiratory tract infections |          | FP     | HP:0011110 | Tonsillitis                                        |          | FP     |
| HP:0002020 | Gastroesophageal reflux                      |          | FP     | HP:0002093 | Respiratory insufficiency                          | 15523420 | TP     |
| HP:0001602 | Laryngeal stenosis                           | 22995201 | TP     | HP:0002094 | Dyspnea                                            | 8628614  | TP     |
| HP:0001613 | Hoarse voice (caused by tumor impingement)   |          | FP     | HP:0001606 | Vocal cord paralysis (caused by tumor impingement) |          | FP     |
| HP:0004894 | Laryngotracheal stenosis                     | 3924864  | FN     | HP:0001618 | Dysphonia                                          | 22433683 | FN     |
| HP:0100750 | Atelectasis                                  | 19859734 | FN     | HP:0011948 | Acute respiratory tract infection                  | 18995152 | FN     |
| HP:0100598 | Pulmonary edema                              | 857236   | FN     | HP:0012027 | Laryngeal edema                                    | 7800389  | FN     |
| HP:0002880 | Respiratory difficulties                     | 529358   | FN     | HP:0011134 | Low-grade fever                                    | 8336098  | FN     |
| HP:0003212 | Increased IgE level                          | 6778038  | FN     | HP:0002777 | Tracheal stenosis                                  | 22995201 | FN     |
| HP:0001944 | Dehydration                                  | 8417425  | FN     | HP:0002013 | Vomiting                                           | 9990833  | FN     |
| HP:0000737 | Irritability                                 | 8114457  | FN     | HP:0100806 | Sepsis                                             | 11510049 | FN     |
| HP:0005951 | Progressive inspiratory stridor              | 6386967  | FN     | HP:0008755 | Laryngotracheomalacia                              | 16363272 | FN     |
| HP:0003237 | Increased IgG level                          | 6778038  | FN     | HP:0002791 | Hypoventilation                                    | 16647977 | FN     |
| HP:0000713 | Agitation                                    | -        | FN     | HP:0004429 | Recurrent viral infections                         | 2117137  | FN     |
| HP:0002870 | Obstructive sleep apnea                      | 6379587  | FN     | HP:0010783 | Erythema                                           | 14723257 | FN     |
| HP:0004890 | Elevated pulmonary artery pressure           | 16647977 | FN     | HP:0002017 | Nausea and vomiting                                | 10065566 | FN     |



**Table S17.** Overview of HPO annotations for **Ethmoid Sinusitis** that were derived by concept recognition in PubMed using BioLark. There were 5 true positives, 13 false positives, and 30 false negatives.

| ID         | Name                                         | pmid     | status | ID         | Name                       | pmid     | status |
|------------|----------------------------------------------|----------|--------|------------|----------------------------|----------|--------|
| HP:0000246 | Sinusitis                                    | 7588871  | TP     | HP:0011109 | Chronic sinusitis          |          | FP     |
| HP:0000255 | Acute sinusitis                              |          | FP     | HP:0100582 | Nasal polyposis            | 16216171 | TP     |
| HP:0100658 | Cellulitis                                   |          | FP     | HP:0011108 | Recurrent sinusitis        |          | FP     |
| HP:0001742 | Nasal obstruction                            | 16496109 | TP     | HP:0000520 | Proptosis                  |          | FP     |
| HP:0002331 | Headache (with pheochromocytoma)             |          | FP     | HP:0000572 | Visual loss                |          | FP     |
| HP:0002099 | Asthma                                       |          | FP     | HP:0001287 | Meningitis                 | 9072242  | TP     |
| HP:0000718 | Aggressive behavior                          |          | FP     | HP:0100699 | Scarring                   |          | FP     |
| HP:0002090 | Pneumonia                                    |          | FP     | HP:0100653 | Optic neuritis             |          | FP     |
| HP:0000245 | Abnormality of the sinuses                   |          | FP     | HP:0000486 | Strabismus                 | 12792325 | TP     |
| HP:0002754 | Osteomyelitis                                | 20069309 | FN     | HP:0001945 | Fever                      | 18431903 | FN     |
| HP:0002719 | Recurrent infections                         | 9230316  | FN     | HP:0000651 | Diplopia                   | 16238043 | FN     |
| HP:0001880 | Eosinophilia                                 | 8335853  | FN     | HP:0000622 | Blurred vision             | 9037991  | FN     |
| HP:0000602 | Ophthalmoplegia                              | 1845269  | FN     | HP:0000421 | Epistaxis                  | 1391808  | FN     |
| HP:0002788 | Recurrent upper respiratory tract infections | 11385344 | FN     | HP:0005305 | Cerebral venous thrombosis | 8750066  | FN     |
| HP:0100806 | Sepsis                                       | 10699248 | FN     | HP:0002315 | Headache                   | 19076651 | FN     |
| HP:0002257 | Chronic rhinitis                             | 19452706 | FN     | HP:0100539 | Periorbital edema          | 8830571  | FN     |
| HP:0004409 | Hyposmia                                     | 17685054 | FN     | HP:0000603 | Central scotoma            | 20727299 | FN     |
| HP:0000579 | Nasolacrimal duct obstruction                | 20639782 | FN     | HP:0000458 | Anosmia                    | 8758625  | FN     |
| HP:0011134 | Low-grade fever                              | 12652233 | FN     | HP:0009926 | Increased lacrimation      | 20639782 | FN     |
| HP:0000575 | Scotoma                                      | 9695165  | FN     | HP:0001085 | Papilledema                | 11713715 | FN     |
| HP:0007686 | Abnormal pupillary function                  | 9037991  | FN     | HP:0001123 | Visual field defect        | 9695165  | FN     |
| HP:0000508 | Ptosis                                       | 19930782 | FN     | HP:0100660 | Dyskinesia                 | 19953662 | FN     |
| HP:0010783 | Erythema                                     | 8944354  | FN     | HP:0002013 | Vomiting                   | 7772962  | FN     |
| HP:0000737 | Irritability                                 | 11902076 | FN     | HP:0002360 | Sleep disturbance          | 8515694  | FN     |

**Table S18.** Overview of HPO annotations for **Laryngeal Tuberculosis** that were derived by concept recognition in PubMed using BioLark. There were 10 true positives, 2 false positives, and 9 false negatives.

| ID         | Name                  | pmid                            | status | ID         | Name                                       | pmid                | status |
|------------|-----------------------|---------------------------------|--------|------------|--------------------------------------------|---------------------|--------|
| HP:0001609 | Hoarse voice          | 19720251                        | TP     | HP:0001618 | Dysphonia                                  | 11715262            | TP     |
| HP:0002015 | Dysphagia             | 9580143                         | TP     | HP:0001613 | Hoarse voice (caused by tumor impingement) |                     | FP     |
| HP:0011110 | Tonsillitis           | 18634293                        | TP     | HP:0010307 | Stridor                                    | 8445701             | TP     |
| HP:0002716 | Lymphadenopathy       | 16360822                        | TP     | HP:0001945 | Fever                                      | 15455624            | TP     |
| HP:0001824 | Weight loss           | 22755382                        | TP     | HP:0002840 | Lymphadenitis                              | 7681653<br>14567053 | TP     |
| HP:0002721 | Immunodeficiency      |                                 | FP     | HP:0002955 | Granulomatosis                             | 18538743            | TP     |
| HP:0011850 | Parotitis             | 19656502<br>16358915<br>9627234 | FN     | HP:0000975 | Hyperhidrosis                              | 22755382            | FN     |
| HP:0002094 | Dyspnea               | 17633676                        | FN     | HP:0011134 | Low-grade fever                            | 19621599            | FN     |
| HP:0002113 | Pulmonary infiltrates | 11347458                        | FN     | HP:0006511 | Laryngeal stridor                          | 7803014             | FN     |
| HP:0012027 | Laryngeal edema       | 19621599                        | FN     | HP:0002781 | Upper airway obstruction                   | 8445701             | FN     |
| HP:0002039 | Anorexia              | 15455624                        | FN     |            |                                            |                     |        |

**Table S19.** Overview of HPO annotations for **Acromegaly** that were derived by concept recognition in PubMed using BioLark. There were 21 true positives, 71 false positives, and 23 false negatives.

| ID         | Name                                  | pmid     | status | ID         | Name                                 | pmid     | status |
|------------|---------------------------------------|----------|--------|------------|--------------------------------------|----------|--------|
| HP:0000845 | Growth hormone excess                 |          | FP     | HP:0002893 | Pituitary adenoma                    |          | FP     |
| HP:0011750 | Neoplasm of the anterior pituitary    |          | FP     | HP:0006767 | Pituitary prolactin cell adenoma     |          | FP     |
| HP:0000870 | Prolactin excess                      |          | FP     | HP:0000822 | Hypertension                         |          | FP     |
| HP:0000819 | Diabetes mellitus                     |          | FP     | HP:0000855 | Insulin resistance                   | 18393170 | TP     |
| HP:0100646 | Thyroiditis                           |          | FP     | HP:0000833 | Glucose intolerance                  | 18578866 | TP     |
| HP:0002331 | Headache (with pheochromocytoma)      |          | FP     | HP:0000824 | Growth hormone deficiency            |          | FP     |
| HP:0002527 | Falls                                 |          | FP     | HP:0001638 | Cardiomyopathy                       |          | FP     |
| HP:0001578 | Hypercortisolism                      |          | FP     | HP:0001733 | Pancreatitis                         |          | FP     |
| HP:0010735 | Polyostotic fibrous dysplasia         |          | FP     | HP:0100570 | Carcinoid                            |          | FP     |
| HP:0001943 | Hypoglycemia                          |          | FP     | HP:0000135 | Hypogonadism                         |          | FP     |
| HP:0010535 | Sleep apnea                           | 18578866 | TP     | HP:0001712 | Left ventricular hypertrophy         |          | FP     |
| HP:0001640 | Cardiomegaly                          | 18578866 | TP     | HP:0100568 | Neoplasm of the endocrine system     |          | FP     |
| HP:0000836 | Hyperthyroidism                       |          | FP     | HP:0000975 | Hyperhidrosis                        |          | FP     |
| HP:0001635 | Congestive heart failure              |          | FP     | HP:0000873 | Diabetes insipidus                   |          | FP     |
| HP:0001123 | Visual field defect                   | 23337021 | TP     | HP:0000821 | Hypothyroidism                       |          | FP     |
| HP:0000141 | Amenorrhea                            | 18578866 | TP     | HP:0001297 | Stroke                               |          | FP     |
| HP:0000303 | Mandibular prognathia                 | 10196815 | TP     | HP:0003040 | Arthropathy                          |          | FP     |
| HP:0001513 | Obesity                               |          | FP     | HP:0000718 | Aggressive behavior                  |          | FP     |
| HP:0007354 | Amyotrophic lateral sclerosis         |          | FP     | HP:0000871 | Panhypopituitarism                   |          | FP     |
| HP:0000853 | Goiter                                | 18578866 | TP     | HP:0000839 | Pituitary dwarfism                   |          | FP     |
| HP:0003074 | Hyperglycemia                         |          | FP     | HP:0002870 | Obstructive sleep apnea              | 18578866 | TP     |
| HP:0011761 | Pituitary null cell adenoma           |          | FP     | HP:0000939 | Osteoporosis                         |          | FP     |
| HP:0003365 | Arthralgia of the hip                 | 18578866 | TP     | HP:0003003 | Colon cancer                         |          | FP     |
| HP:0000842 | Hyperinsulinemia                      | 1806481  | TP     | HP:0002829 | Arthralgia                           |          | FP     |
| HP:0001324 | Muscle weakness                       |          | FP     | HP:0004322 | Short stature                        |          | FP     |
| HP:0000158 | Macroglossia                          | 18578866 | TP     | HP:0100829 | Galactorrhoea                        | 11352287 | TP     |
| HP:0001000 | Abnormality of skin pigmentation      |          | FP     | HP:0002014 | Diarrhea                             |          | FP     |
| HP:0001952 | Abnormal glucose tolerance            |          | FP     | HP:0003510 | Severe short stature                 |          | FP     |
| HP:0000831 | Insulin-resistant diabetes mellitus   | 18578866 | TP     | HP:0001677 | Coronary artery disease              |          | FP     |
| HP:0100774 | Hyperostosis                          | 18578866 | TP     | HP:0003005 | Ganglioneuroma                       |          | FP     |
| HP:0000098 | Tall stature                          | 21158216 | TP     | HP:0011675 | Arrhythmia                           |          | FP     |
| HP:0002666 | Pheochromocytoma                      |          | FP     | HP:0002039 | Anorexia                             |          | FP     |
| HP:0002910 | Elevated hepatic transaminases        |          | FP     | HP:0002858 | Meningioma                           |          | FP     |
| HP:0001644 | Dilated cardiomyopathy                |          | FP     | HP:0001627 | Abnormality of the heart             |          | FP     |
| HP:0002690 | Large sella turcica                   | 9474613  | TP     | HP:0000505 | Visual impairment                    |          | FP     |
| HP:0010541 | Cutis gyrata of scalp                 | 18211488 | TP     | HP:0000956 | Acanthosis nigricans                 | 7951506  | TP     |
| HP:0002781 | Upper airway obstruction              | 18578866 | TP     | HP:0001654 | Abnormality of the heart valves      |          | FP     |
| HP:0002758 | Osteoarthritis                        |          | FP     | HP:0003774 | End stage renal disease              |          | FP     |
| HP:0002119 | Ventriculomegaly                      |          | FP     | HP:0008291 | Pituitary corticotropic cell adenoma |          | FP     |
| HP:0011760 | Pituitary growth hormone cell adenoma |          | FP     | HP:0000147 | Polycystic ovaries                   | 17651451 | TP     |
| HP:0000103 | Polyuria                              |          | FP     | HP:0100651 | Type I diabetes mellitus             |          | FP     |
| HP:0005978 | Type II diabetes mellitus             |          | FP     | HP:0002684 | Thickened calvaria                   |          | FP     |
| HP:0009800 | Maternal diabetes                     |          | FP     | HP:0000140 | Abnormality of the menstrual cycle   |          | FP     |
| HP:0000823 | Delayed puberty                       |          | FP     | HP:0003162 | Fasting hypoglycemia                 |          | FP     |
| HP:0003351 | Decreased circulating renin level     |          | FP     | HP:0011762 | Pituitary thyrotropic cell adenoma   |          | FP     |
| HP:0002737 | Thick skull base                      |          | FP     | HP:0002681 | Deformed sella turcica               |          | FP     |

*continued on the next page*

**Table S19. Acromegaly – continued**

| <b>ID</b>  | <b>Name</b>                    | <b>pmid</b>         | <b>status</b> | <b>ID</b>  | <b>Name</b>                   | <b>pmid</b>        | <b>status</b> |
|------------|--------------------------------|---------------------|---------------|------------|-------------------------------|--------------------|---------------|
| HP:0002007 | Frontal bossing                | 18578866            | FN            | HP:0000280 | Coarse facial features        | 23329711           | FN            |
| HP:0010609 | Skin tags                      | 18578866            | FN            | HP:0001670 | Asymmetric septal hypertrophy | 154293             | FN            |
| HP:0001176 | Large hands                    | 18578866            | FN            | HP:0000858 | Menstrual irregularities      | 17651451           | FN            |
| HP:0004416 | Precocious atherosclerosis     | 9389993             | FN            | HP:0005987 | Multinodular goiter           | 18578866           | FN            |
| HP:0005994 | Nodular goiter                 | 18578866            | FN            | HP:0002150 | Hypercalciuria                | 1668402            | FN            |
| HP:0001685 | Myocardial fibrosis            | 1395769             | FN            | HP:0008843 | Hip osteoarthritis            | 21131647           | FN            |
| HP:0001007 | Hirsutism                      | 10443669            | FN            | HP:0003416 | Spinal canal stenosis         | 6664455<br>7919651 | FN            |
| HP:0000689 | Dental malocclusion            | 10196815            | FN            | HP:0001548 | Overgrowth                    | 6805079            | FN            |
| HP:0001639 | Hypertrophic cardiomyopathy    | 20834198<br>9711886 | FN            | HP:0001653 | Mitral regurgitation          | 16580860           | FN            |
| HP:0001081 | Cholelithiasis                 | 8432484             | FN            | HP:0001714 | Ventricular hypertrophy       | 18578866           | FN            |
| HP:0001072 | Thickened skin                 | 18578866            | FN            | HP:0004308 | Ventricular arrhythmia        | 18578866           | FN            |
| HP:0004438 | Hyperostosis frontalis interna | 3731577             | FN            |            |                               |                    |               |

**Table S20.** Overview of HPO annotations for **Primary Hyperparathyroidism** that were derived by concept recognition in PubMed using BioLark. There were 14 true positives, 22 false positives, and 19 false negatives.

| ID         | Name                                 | pmid     | status | ID         | Name                                                 | pmid                 | status |
|------------|--------------------------------------|----------|--------|------------|------------------------------------------------------|----------------------|--------|
| HP:0008200 | Primary hyperparathyroidism          | 22173046 | TP     | HP:0002897 | Parathyroid adenoma                                  |                      | FP     |
| HP:0003072 | Hypercalcemia                        | 22271812 | TP     | HP:0006780 | Parathyroid carcinoma                                |                      | FP     |
| HP:0000787 | Nephrolithiasis                      | 22173046 | TP     | HP:0100646 | Thyroiditis                                          |                      | FP     |
| HP:0100568 | Neoplasm of the endocrine system     |          | FP     | HP:0000867 | Secondary hyperparathyroidism                        |                      | FP     |
| HP:0002901 | Hypocalcemia                         |          | FP     | HP:0008208 | Parathyroid hyperplasia                              | 19679950             | TP     |
| HP:0000828 | Abnormality of the parathyroid gland |          | FP     | HP:0000843 | Hyperparathyroidism                                  |                      | FP     |
| HP:0011769 | Ectopic parathyroid                  |          | FP     | HP:0000939 | Osteoporosis                                         | 18057667             | TP     |
| HP:0002757 | Recurrent fractures                  | 23098341 | TP     | HP:0011770 | Tertiary hyperparathyroidism                         |                      | FP     |
| HP:0000820 | Abnormality of the thyroid gland     |          | FP     | HP:0000938 | Osteopenia                                           | 19685826<br>18057655 | TP     |
| HP:0000829 | Hypoparathyroidism                   |          | FP     | HP:0003165 | Elevated circulating parathyroid hormone (PTH) level | 23374741             | TP     |
| HP:0002150 | Hypercalciuria                       | 22584631 | TP     | HP:0000121 | Nephrocalcinosis                                     | 23715355             | TP     |
| HP:0002653 | Bone pain                            | 17263969 | TP     | HP:0000822 | Hypertension                                         |                      | FP     |
| HP:0001324 | Muscle weakness                      | 22271812 | TP     | HP:0000853 | Goiter                                               |                      | FP     |
| HP:0002835 | Aspiration                           |          | FP     | HP:0002895 | Papillary thyroid carcinoma                          |                      | FP     |
| HP:0005987 | Multinodular goiter                  |          | FP     | HP:0000103 | Polyuria                                             | 20200146             | TP     |
| HP:0005897 | Severe osteoporosis                  | 23553864 | TP     | HP:0000836 | Hyperthyroidism                                      |                      | FP     |
| HP:0002527 | Falls                                |          | FP     | HP:0003774 | End stage renal disease                              |                      | FP     |
| HP:0001733 | Pancreatitis                         |          | FP     | HP:0003127 | Hypocalciuria                                        |                      | FP     |
| HP:0002148 | Hypophosphatemia                     | 17201799 | FN     | HP:0003155 | Elevated alkaline phosphatase                        | 17370440             | FN     |
| HP:0002756 | Pathologic fracture                  | 19685826 | FN     | HP:0004934 | Vascular calcification                               | 23046088             | FN     |
| HP:0003326 | Myalgia                              | 21153954 | FN     | HP:0002019 | Constipation                                         | 21723154             | FN     |
| HP:0002354 | Memory impairment                    | 17263969 | FN     | HP:0001735 | Acute pancreatitis                                   | 18194938             | FN     |
| HP:0002039 | Anorexia                             | 19999395 | FN     | HP:0002018 | Nausea                                               | 17263969             | FN     |
| HP:0000737 | Irritability                         | 19999395 | FN     | HP:0002027 | Abdominal pain                                       | 17602056             | FN     |
| HP:0004349 | Reduced bone mineral density         | 17602056 | FN     | HP:0001824 | Weight loss                                          | 17263969             | FN     |
| HP:0000716 | Depression                           | 23374740 | FN     | HP:0001254 | Lethargy                                             | 17602056             | FN     |
| HP:0000720 | Mood swings                          | 17263969 | FN     | HP:0002748 | Rickets                                              | 19189688             | FN     |
| HP:0004724 | Calcium nephrolithiasis              | 21183554 | FN     |            |                                                      |                      |        |

**Table S21.** Overview of HPO annotations for **Alcoholic Pancreatitis** that were derived by concept recognition in PubMed using BioLark. There were 18 true positives, 8 false positives, and 17 false negatives.

| ID         | Name                              | pmid                 | status | ID         | Name                            | pmid                | status |
|------------|-----------------------------------|----------------------|--------|------------|---------------------------------|---------------------|--------|
| HP:0006280 | Chronic pancreatitis              |                      | FP     | HP:0001735 | Acute pancreatitis              | 12828958            | TP     |
| HP:0005206 | Pancreatic pseudocyst             | 17967181             | TP     | HP:0001733 | Pancreatitis                    |                     | FP     |
| HP:0100732 | Pancreatic fibrosis               | 12828957             | TP     | HP:0100027 | Recurrent pancreatitis          | 18415757            | TP     |
| HP:0005213 | Pancreatic calcification          | 13509579             | TP     | HP:0002027 | Abdominal pain                  | 12170706            | TP     |
| HP:0001081 | Cholelithiasis                    |                      | FP     | HP:0002894 | Neoplasm of the pancreas        |                     | FP     |
| HP:0001738 | Exocrine pancreatic insufficiency | 12828957             | TP     | HP:0001394 | Cirrhosis                       |                     | FP     |
| HP:0100844 | Pancreatic fistula                | 22560825             | TP     | HP:0002239 | Gastrointestinal hemorrhage     | 9445739             | TP     |
| HP:0000819 | Diabetes mellitus                 | 10430382             | TP     | HP:0002960 | Autoimmunity                    |                     | FP     |
| HP:0002570 | Steatorrhea                       | 18985807             | TP     | HP:0006725 | Pancreatic adenocarcinoma       | 20455050            | TP     |
| HP:0002202 | Pleural effusion                  | 17516324             | TP     | HP:0005236 | Chronic calcifying pancreatitis | 13509579            | TP     |
| HP:0001541 | Ascites                           | 17516324             | TP     | HP:0001396 | Cholestasis                     | 11393404            | TP     |
| HP:0000952 | Jaundice                          | 17198198             | TP     | HP:0004395 | Malnutrition                    |                     | FP     |
| HP:0000488 | Retinopathy                       | 15803177             | TP     | HP:0002617 | Aneurysm                        |                     | FP     |
| HP:0001737 | Pancreatic cysts                  | 20232071             | FN     | HP:0002248 | Hematemesis                     | 12353152            | FN     |
| HP:0002024 | Malabsorption                     | 9139143              | FN     | HP:0001409 | Portal hypertension             | 16001677            | FN     |
| HP:0003077 | Hyperlipidemia                    | 22487474             | FN     | HP:0003418 | Back pain                       | 12170706            | FN     |
| HP:0002014 | Diarrhea                          | 9168660              | FN     | HP:0001824 | Weight loss                     | 15986640            | FN     |
| HP:0002586 | Peritonitis                       | 15500780             | FN     | HP:0001945 | Fever                           | 15273919            | FN     |
| HP:0100867 | Duodenal stenosis                 | 17198198<br>12383218 | FN     | HP:0002574 | Episodic abdominal pain         | 19697839            | FN     |
| HP:0002013 | Vomiting                          | 15841034             | FN     | HP:0002573 | Hematochezia                    | 17148930            | FN     |
| HP:0003270 | Abdominal distention              | 18516005             | FN     | HP:0001698 | Pericardial effusion            | 9231991<br>12439127 | FN     |
| HP:0002249 | Melena                            | 17925742             | FN     |            |                                 |                     |        |

**Table S22.** Overview of HPO annotations for **Angioedema** that were derived by concept recognition in PubMed using BioLark. There were 27 true positives, 24 false positives, and 47 false negatives.

| ID         | Name                             | pmid     | status | ID         | Name                                    | pmid     | status |
|------------|----------------------------------|----------|--------|------------|-----------------------------------------|----------|--------|
| HP:0100665 | Angioedema                       | 7083632  | TP     | HP:0001025 | Urticaria                               | 7083632  | TP     |
| HP:0012027 | Laryngeal edema                  | 18030852 | TP     | HP:0002027 | Abdominal pain                          | 11823949 | TP     |
| HP:0002099 | Asthma                           |          | FP     | HP:0100845 | Anaphylactic shock                      | 17244953 | TP     |
| HP:0004431 | Complement deficiency            |          | FP     | HP:0010783 | Erythema                                | -        | TP     |
| HP:0002781 | Upper airway obstruction         | 8599504  | TP     | HP:0001880 | Eosinophilia                            |          | FP     |
| HP:0000822 | Hypertension                     |          | FP     | HP:0002574 | Episodic abdominal pain                 | 5511819  | TP     |
| HP:0000282 | Facial edema                     | 12139356 | TP     | HP:0002725 | Systemic lupus erythematosus            |          | FP     |
| HP:0000964 | Eczema                           |          | FP     | HP:0002615 | Hypotension                             | 11842287 | TP     |
| HP:0005523 | Lymphoproliferative disorder     |          | FP     | HP:0002013 | Vomiting                                | 17343080 | TP     |
| HP:0001541 | Ascites                          | 17285209 | TP     | HP:0001047 | Atopic dermatitis                       |          | FP     |
| HP:0001635 | Congestive heart failure         |          | FP     | HP:0002014 | Diarrhea                                | 16464219 | TP     |
| HP:0002098 | Respiratory distress             | 12829880 | TP     | HP:0002665 | Lymphoma                                |          | FP     |
| HP:0005945 | Laryngeal obstruction            | 17487816 | TP     | HP:0002094 | Dyspnea                                 | 17694700 | TP     |
| HP:0011458 | Abdominal symptom                | 8438855  | TP     | HP:0100646 | Thyroiditis                             |          | FP     |
| HP:0100495 | Mastocytosis                     |          | FP     | HP:0002017 | Nausea and vomiting                     |          | FP     |
| HP:0011855 | Pharyngeal edema                 | 6649745  | TP     | HP:0005225 | Intestinal edema                        | 1215911  | TP     |
| HP:0003365 | Arthralgia of the hip            |          | FP     | HP:0002015 | Dysphagia                               | 17296538 | TP     |
| HP:0002018 | Nausea                           |          | FP     | HP:0003193 | Allergic rhinitis                       |          | FP     |
| HP:0000099 | Glomerulonephritis               |          | FP     | HP:0010307 | Stridor                                 | 17487816 | TP     |
| HP:0003493 | Antinuclear antibody positivity  |          | FP     | HP:0100539 | Periorbital edema                       | 21570492 | TP     |
| HP:0002527 | Falls                            |          | FP     | HP:0001369 | Arthritis                               |          | FP     |
| HP:0007430 | Generalized edema                | 1611187  | TP     | HP:0005550 | Chronic lymphatic leukemia              |          | FP     |
| HP:0002576 | Intussusception                  | 16464219 | TP     | HP:0001386 | Joint swelling                          | 1249347  | TP     |
| HP:0001279 | Syncope                          |          | FP     | HP:0002037 | Inflammation of the large intestine     | 22408362 | TP     |
| HP:0004791 | Esophageal ulceration            |          | FP     | HP:0006775 | Multiple myeloma                        |          | FP     |
| HP:0010742 | Edema of the upper limbs         | 1650077  | TP     | HP:0010749 | Blepharochalasis                        | 18319025 | FN     |
| HP:0006511 | Laryngeal stridor                | 2700663  | FN     | HP:0000158 | Macroglossia                            | 21495883 | FN     |
| HP:0002307 | Drooling                         | 18036423 | FN     | HP:0001609 | Hoarse voice                            | 3071076  | FN     |
| HP:0000988 | Skin rash                        | 1514010  | FN     | HP:0009763 | Limb pain                               | 9542615  | FN     |
| HP:0003270 | Abdominal distention             | 11823949 | FN     | HP:0002321 | Vertigo                                 | 22791189 | FN     |
| HP:0002202 | Pleural effusion                 | 11524698 | FN     | HP:0100749 | Chest pain                              | 14696809 | FN     |
| HP:0001945 | Fever                            | 20873964 | FN     | HP:0002960 | Autoimmunity                            | 17547847 | FN     |
| HP:0011848 | Abdominal colic                  | 10525217 | FN     | HP:0010808 | Protruding tongue                       | 8599504  | FN     |
| HP:0005339 | Abnormality of complement system | 589782   | FN     | HP:0003565 | Elevated erythrocyte sedimentation rate | 3823366  | FN     |
| HP:0001742 | Nasal obstruction                | 2814292  | FN     | HP:0005521 | Disseminated intravascular coagulation  | 341410   | FN     |
| HP:0004796 | Gastrointestinal obstruction     | 23137231 | FN     | HP:0003496 | Increased IgM level                     | 9873168  | FN     |
| HP:0005348 | Inspiratory stridor              | -        | FN     | HP:0002880 | Respiratory difficulties                | 10887769 | FN     |
| HP:0002789 | Tachypnea                        | 16230465 | FN     | HP:0011106 | Hypovolemia                             | 16271103 | FN     |
| HP:0000508 | Ptosis                           | 19298902 | FN     | HP:0100724 | Hypercoagulability                      | 9652897  | FN     |
| HP:0100598 | Pulmonary edema                  | 269002   | FN     | HP:0000967 | Petechiae                               | 6627625  | FN     |
| HP:0001618 | Dysphonia                        | 16267649 | FN     | HP:0001260 | Dysarthria                              | 8358121  | FN     |

*continued on the next page*

**Table S22. Angioedema – continued**

| <b>ID</b>  | <b>Name</b>                 | <b>pmid</b> | <b>status</b> | <b>ID</b>  | <b>Name</b>                  | <b>pmid</b> | <b>status</b> |
|------------|-----------------------------|-------------|---------------|------------|------------------------------|-------------|---------------|
| HP:0002113 | Pulmonary infiltrates       | 3264480     | FN            | HP:0000520 | Proptosis                    | 1911519     | FN            |
| HP:0002093 | Respiratory insufficiency   | 1963718     | FN            | HP:0100326 | Immunologic hypersensitivity | 8959545     | FN            |
| HP:0000232 | Everted lower lip vermilion | 267704      | FN            | HP:0001225 | Wrist swelling               | 11315937    | FN            |
| HP:0001041 | Facial erythema             | 17505688    | FN            | HP:0100540 | Palpebral edema              | 17694700    | FN            |
| HP:0001741 | Phimosis                    | 22560272    | FN            | HP:0010741 | Edema of the lower limbs     | 15924048    | FN            |
| HP:0000157 | Abnormality of the tongue   | 10619346    | FN            | HP:0004313 | Hypogammaglobulinemia        | 3405564     | FN            |
| HP:0005214 | Intestinal obstruction      | 17395288    | FN            | HP:0005268 | Spontaneous abortion         | -           | FN            |
| HP:0002890 | Thyroid carcinoma           | 7170879     | FN            | HP:0001928 | Abnormality of coagulation   | -           | FN            |



**Table S23.** Overview of HPO annotations for **Phototoxic Dermatitis** that were derived by concept recognition in PubMed using BioLark. There were 7 true positives, 10 false positives, and 1 false negatives.

| ID         | Name                          | pmid     | status | ID         | Name                             | pmid     | status |
|------------|-------------------------------|----------|--------|------------|----------------------------------|----------|--------|
| HP:0000992 | Cutaneous photosensitivity    |          | FP     | HP:0010783 | Erythema                         |          | FP     |
| HP:0000737 | Irritability                  |          | FP     | HP:0000964 | Eczema                           | 10438232 | TP     |
| HP:0007354 | Amyotrophic lateral sclerosis |          | FP     | HP:0001000 | Abnormality of skin pigmentation | -        | TP     |
| HP:0000969 | Edema                         | 17223870 | TP     | HP:0001324 | Muscle weakness                  |          | FP     |
| HP:0007537 | Severe photosensitivity       | 11868977 | TP     | HP:0008066 | Abnormal blistering of the skin  | 17459294 | TP     |
| HP:0003765 | Psoriasis                     |          | FP     | HP:0000613 | Photophobia                      |          | FP     |
| HP:0001025 | Urticaria                     |          | FP     | HP:0002860 | Squamous cell carcinoma          |          | FP     |
| HP:0002861 | Malignant melanoma            |          | FP     | HP:0000989 | Pruritus                         | 19138025 | TP     |
| HP:0000953 | Hyperpigmentation of the skin | 19687425 | TP     | HP:0001806 | Onycholysis                      | 17688387 | FN     |

**Table S24.** Overview of HPO annotations for **Dyshidrotic Eczema** that were derived by concept recognition in PubMed using BioLark. There were 5 true positives, 2 false positives, and 5 false negatives.

| ID         | Name                       | pmid     | status | ID         | Name                   | pmid     | status |
|------------|----------------------------|----------|--------|------------|------------------------|----------|--------|
| HP:0000964 | Eczema                     | 11011918 | TP     | HP:0000975 | Hyperhidrosis          | 1293189  | TP     |
| HP:0001047 | Atopic dermatitis          |          | FP     | HP:0000989 | Pruritus               | 22545332 | TP     |
| HP:0007410 | Palmoplantar hyperhidrosis | 8982415  | TP     | HP:0010783 | Erythema               | 22691103 | TP     |
| HP:0003765 | Psoriasis                  |          | FP     | HP:0008391 | Dystrophic fingernails | 19076887 | FN     |
| HP:0007446 | Palmoplantar blistering    | 8113043  | FN     | HP:0001065 | Striae distensae       | 11395652 | FN     |
| HP:0003212 | Increased IgE level        | 14616819 | FN     | HP:0000988 | Skin rash              | 22738245 | FN     |

**Table S25.** Overview of HPO annotations for **Viral Encephalitis** that were derived by concept recognition in PubMed using BioLark. There were 17 true positives, 32 false positives, and 32 false negatives.

| ID         | Name                             | pmid                             | status | ID         | Name                                                         | pmid                             | status |
|------------|----------------------------------|----------------------------------|--------|------------|--------------------------------------------------------------|----------------------------------|--------|
| HP:0002383 | Encephalitis                     | -                                | TP     | HP:0001298 | Encephalopathy                                               |                                  | FP     |
| HP:0001287 | Meningitis                       |                                  | FP     | HP:0001250 | Seizures                                                     |                                  | FP     |
| HP:0001945 | Fever                            | 10349352<br>11858542<br>17326940 | TP     | HP:0002721 | Immunodeficiency                                             |                                  | FP     |
| HP:0006846 | Acute encephalopathy             | 11857527                         | TP     | HP:0011096 | Peripheral demyelination                                     |                                  | FP     |
| HP:0001259 | Coma                             | 11022140                         | TP     | HP:0002373 | Febrile seizures                                             |                                  | FP     |
| HP:0002181 | Cerebral edema                   | 15461026                         | TP     | HP:0001974 | Leukocytosis                                                 |                                  | FP     |
| HP:0002331 | Headache (with pheochromocytoma) |                                  | FP     | HP:0003470 | Paralysis                                                    |                                  | FP     |
| HP:0011450 | CNS infection                    |                                  | FP     | HP:0001289 | Confusion                                                    | 23307455                         | TP     |
| HP:0000726 | Dementia                         |                                  | FP     | HP:0001251 | Ataxia                                                       | 9471108                          | TP     |
| HP:0003881 | Humeral sclerosis                |                                  | FP     | HP:0001025 | Urticaria                                                    |                                  | FP     |
| HP:0002133 | Status epilepticus               | 11022140                         | TP     | HP:0002354 | Memory impairment                                            |                                  | FP     |
| HP:0002171 | Gliosis                          | 7472530<br>12126146              | TP     | HP:0002960 | Autoimmunity                                                 |                                  | FP     |
| HP:0001336 | Myoclonus                        |                                  | FP     | HP:0002719 | Recurrent infections                                         |                                  | FP     |
| HP:0006980 | Leukoencephalopathy, progressive | 19001657                         | TP     | HP:0010280 | Stomatitis                                                   |                                  | FP     |
| HP:0002665 | Lymphoma                         |                                  | FP     | HP:0002329 | Drowsiness                                                   | 11858542                         | TP     |
| HP:0100598 | Pulmonary edema                  |                                  | FP     | HP:0006965 | Acute necrotizing encephalopathy                             | 12116748<br>21801621             | TP     |
| HP:0001324 | Muscle weakness                  |                                  | FP     | HP:0002013 | Vomiting                                                     | 9471108                          | TP     |
| HP:0002633 | Vasculitis                       |                                  | FP     | HP:0011947 | Respiratory tract infection                                  |                                  | FP     |
| HP:0002093 | Respiratory insufficiency        |                                  | FP     | HP:0001269 | Hemiparesis                                                  | 18045307<br>12353193             | TP     |
| HP:0003006 | Neuroblastoma                    |                                  | FP     | HP:0000639 | Nystagmus                                                    | 11857527<br>20544248             | TP     |
| HP:0001297 | Stroke                           |                                  | FP     | HP:0002045 | Hypothermia                                                  |                                  | FP     |
| HP:0002084 | Encephalocele                    |                                  | FP     | HP:0010543 | Opsoclonus                                                   | 9103875                          | TP     |
| HP:0002301 | Hemiplegia                       | 16638508                         | TP     | HP:0006530 | Interstitial pulmonary disease                               |                                  | FP     |
| HP:0002179 | Opisthotonus                     |                                  | FP     | HP:0001285 | Spastic tetraparesis                                         |                                  | FP     |
| HP:0006957 | Loss of ability to walk          |                                  | FP     | HP:0007307 | Rapid neurologic deterioration                               | 23107158                         | FN     |
| HP:0002922 | Increased CSF protein            | 11809148                         | FN     | HP:0005318 | Cerebral vasculitis                                          | 11118800                         | FN     |
| HP:0002448 | Progressive encephalopathy       | 8666375<br>14749962              | FN     | HP:0002446 | Astrocytosis                                                 | 22797933                         | FN     |
| HP:0002300 | Mutism                           | 16847369<br>16776434             | FN     | HP:0002367 | Visual hallucinations                                        | 12134688<br>12690279             | FN     |
| HP:0000741 | Apathy                           | 22790284                         | FN     | HP:0002384 | Focal seizures with impairment of consciousness or awareness | 11022140                         | FN     |
| HP:0000751 | Personality changes              | 23307455                         | FN     | HP:0001262 | Somnolence                                                   | 18021926                         | FN     |
| HP:0002516 | Increased intracranial pressure  | 17074607                         | FN     | HP:0002072 | Chorea                                                       | 23307455                         | FN     |
| HP:0007185 | Loss of consciousness            | 10191896                         | FN     | HP:0001254 | Lethargy                                                     | 23607233                         | FN     |
| HP:0002059 | Cerebral atrophy                 | 15626538                         | FN     | HP:0002902 | Hyponatremia                                                 | 23173742                         | FN     |
| HP:0002353 | EEG abnormality                  | 16047296                         | FN     | HP:0000713 | Agitation                                                    | 15730900<br>16283448<br>20549967 | FN     |
| HP:0002381 | Aphasia                          | 16909792                         | FN     | HP:0010628 | Facial palsy                                                 | 11890853                         | FN     |

*continued on the next page*

**Table S25. Viral Encephalitis – continued**

| <b>ID</b>  | <b>Name</b>                       | <b>pmid</b>                                 | <b>status</b> | <b>ID</b>  | <b>Name</b>                            | <b>pmid</b> | <b>status</b> |
|------------|-----------------------------------|---------------------------------------------|---------------|------------|----------------------------------------|-------------|---------------|
| HP:0100785 | Insomnia                          | 22971937<br>11706967<br>7555630<br>14679780 | FN            | HP:0006824 | Cranial nerve paralysis                | 17116698    | FN            |
| HP:0002197 | Generalized seizures              | 11022140                                    | FN            | HP:0001337 | Tremor                                 | 15077022    | FN            |
| HP:0004305 | Involuntary movements             | 7702698                                     | FN            | HP:0002921 | Abnormality of the cerebrospinal fluid | -           | FN            |
| HP:0000737 | Irritability                      | 22357720                                    | FN            | HP:0001266 | Choreoathetosis                        | 10513697    | FN            |
| HP:0002069 | Generalized tonic-clonic seizures | -                                           | FN            | HP:0002315 | Headache                               | 12757229    | FN            |
| HP:0008765 | Auditory hallucinations           | 16047296                                    | FN            |            |                                        |             |               |

**Table S26.** Overview of HPO annotations for **Isaacs Syndrome** that were derived by concept recognition in PubMed using BioLark. There were 17 true positives, 9 false positives, and 15 false negatives.

| ID         | Name                          | pmid     | status | ID         | Name                           | pmid     | status |
|------------|-------------------------------|----------|--------|------------|--------------------------------|----------|--------|
| HP:0002411 | Myokymia                      | 15257376 | TP     | HP:0003473 | Fatigable weakness             |          | FP     |
| HP:0003394 | Muscle cramps                 | 15257376 | TP     | HP:0003552 | Muscle stiffness               | 16770779 | TP     |
| HP:0100522 | Thymoma                       | 20420181 | TP     | HP:0002960 | Autoimmunity                   | 18801496 | TP     |
| HP:0002380 | Fasciculations                | 16770779 | TP     | HP:0000651 | Diplopia                       | 17633107 | TP     |
| HP:0000975 | Hyperhidrosis                 | 15257376 | TP     | HP:0002131 | Episodic ataxia                |          | FP     |
| HP:0002383 | Encephalitis                  |          | FP     | HP:0001250 | Seizures                       |          | FP     |
| HP:0009830 | Peripheral neuropathy         | 17114847 | TP     | HP:0002486 | Myotonia                       | 12691809 | TP     |
| HP:0003401 | Paresthesia                   | 18801496 | TP     | HP:0001251 | Ataxia                         |          | FP     |
| HP:0100785 | Insomnia                      | 17114847 | TP     | HP:0002459 | Dysautonomia                   |          | FP     |
| HP:0000577 | Exotropia                     | 18607604 | TP     | HP:0003712 | Muscle hypertrophy             | 20382536 | TP     |
| HP:0000486 | Strabismus                    | 18377936 | TP     | HP:0001260 | Dysarthria                     | 11360270 | TP     |
| HP:0003470 | Paralysis                     |          | FP     | HP:0001289 | Confusion                      |          | FP     |
| HP:0008978 | Necrotizing myopathy          |          | FP     | HP:0001371 | Flexion contracture            | 17048446 | TP     |
| HP:0002063 | Rigidity                      | 21576838 | FN     | HP:0001324 | Muscle weakness                | 10768605 | FN     |
| HP:0002355 | Difficulty walking            | 17048446 | FN     | HP:0000508 | Ptosis                         | 23337349 | FN     |
| HP:0002019 | Constipation                  | 15753614 | FN     | HP:0000317 | Facial myokymia                | 12766989 | FN     |
| HP:0008981 | Calf muscle hypertrophy       | 16607862 | FN     | HP:0010546 | Muscle fibrillation            | 19679588 | FN     |
| HP:0009473 | Joint contracture of the hand | 17048446 | FN     | HP:0000565 | Esotropia                      | 17204915 | FN     |
| HP:0009763 | Limb pain                     | 16934467 | FN     | HP:0001311 | Neurophysiological abnormality | 16570308 | FN     |
| HP:0010628 | Facial palsy                  | 17114847 | FN     | HP:0002015 | Dysphagia                      | 17486731 | FN     |
| HP:0000737 | Irritability                  | 17114847 | FN     |            |                                |          |        |

**Table S27.** Overview of HPO annotations for **Tibial Neuropathy** that were derived by concept recognition in PubMed using BioLark. There were 5 true positives, 3 false positives, and 5 false negatives.

| ID         | Name                                | pmid     | status | ID         | Name               | pmid     | status |
|------------|-------------------------------------|----------|--------|------------|--------------------|----------|--------|
| HP:0003450 | Axonal regeneration                 | 18078754 | TP     | HP:0000763 | Sensory neuropathy | -        | TP     |
| HP:0003202 | Amyotrophy                          | 20483119 | TP     | HP:0001324 | Muscle weakness    | -        | TP     |
| HP:0011096 | Peripheral demyelination            |          | FP     | HP:0009831 | Mononeuropathy     | -        | TP     |
| HP:0002617 | Aneurysm                            |          | FP     | HP:0100537 | Fasciitis          |          | FP     |
| HP:0003470 | Paralysis                           | 21284369 | FN     | HP:0100963 | Hyperesthesia      | 7794070  | FN     |
| HP:0000762 | Decreased nerve conduction velocity | 21284369 | FN     | HP:0003401 | Paresthesia        | 21600444 | FN     |
| HP:0001288 | Gait disturbance                    | 3970662  | FN     |            |                    |          |        |

**Table S28.** Overview of HPO annotations for **Adult T-Cell Leukemia Lymphoma** that were derived by concept recognition in PubMed using BioLark. There were 13 true positives, 46 false positives, and 23 false negatives.

| ID         | Name                                          | pmid                            | status | ID         | Name                                          | pmid                 | status |
|------------|-----------------------------------------------|---------------------------------|--------|------------|-----------------------------------------------|----------------------|--------|
| HP:0005517 | T-cell lymphoma/leukemia                      | 10397475                        | TP     | HP:0001909 | Leukemia                                      |                      | FP     |
| HP:0006721 | Acute lymphatic leukemia                      |                                 | FP     | HP:0002665 | Lymphoma                                      |                      | FP     |
| HP:0002196 | Myelopathy                                    |                                 | FP     | HP:0002488 | Acute leukemia                                |                      | FP     |
| HP:0000718 | Aggressive behavior                           |                                 | FP     | HP:0003072 | Hypercalcemia                                 | 18042693             | TP     |
| HP:0005526 | Lymphoid leukemia                             |                                 | FP     | HP:0004808 | Acute myeloid leukemia                        |                      | FP     |
| HP:0002716 | Lymphadenopathy                               | 11798657                        | TP     | HP:0004332 | Abnormality of lymphocytes                    |                      | FP     |
| HP:0002721 | Immunodeficiency                              |                                 | FP     | HP:0005523 | Lymphoproliferative disorder                  |                      | FP     |
| HP:0004430 | Severe combined immunodeficiency              |                                 | FP     | HP:0001433 | Hepatosplenomegaly                            | 19684985             | TP     |
| HP:0005550 | Chronic lymphatic leukemia                    |                                 | FP     | HP:0004377 | Hematological neoplasm                        |                      | FP     |
| HP:0002843 | Abnormality of T cells                        |                                 | FP     | HP:0001945 | Fever                                         | 11798657             | TP     |
| HP:0001744 | Splenomegaly                                  | 10996836                        | TP     | HP:0001974 | Leukocytosis                                  | 1920841              | TP     |
| HP:0000554 | Uveitis                                       |                                 | FP     | HP:0001875 | Neutropenia                                   |                      | FP     |
| HP:0001324 | Muscle weakness                               |                                 | FP     | HP:0007354 | Amyotrophic lateral sclerosis                 |                      | FP     |
| HP:0005558 | Chronic leukemia                              |                                 | FP     | HP:0001873 | Thrombocytopenia                              |                      | FP     |
| HP:0100827 | Lymphocytosis                                 | 15353320                        | TP     | HP:0002090 | Pneumonia                                     |                      | FP     |
| HP:0008940 | Generalized lymphadenopathy                   | 15353320                        | TP     | HP:0002240 | Hepatomegaly                                  | 10495418             | TP     |
| HP:0001903 | Anemia                                        |                                 | FP     | HP:0002960 | Autoimmunity                                  |                      | FP     |
| HP:0002202 | Pleural effusion                              |                                 | FP     | HP:0009919 | Retinoblastoma                                |                      | FP     |
| HP:0004836 | Acute promyelocytic leukemia                  |                                 | FP     | HP:0009824 | Hypoplasia involving bones of the upper limbs |                      | FP     |
| HP:0002863 | Myelodysplasia                                |                                 | FP     | HP:0001251 | Ataxia                                        |                      | FP     |
| HP:0001009 | Telangiectasia                                |                                 | FP     | HP:0002719 | Recurrent infections                          |                      | FP     |
| HP:0000964 | Eczema                                        |                                 | FP     | HP:0002835 | Aspiration                                    |                      | FP     |
| HP:0006775 | Multiple myeloma                              |                                 | FP     | HP:0008069 | Neoplasm of the skin                          |                      | FP     |
| HP:0005531 | Biphenotypic acute leukaemia                  |                                 | FP     | HP:0004845 | Acute monocytic leukemia                      |                      | FP     |
| HP:0002094 | Dyspnea                                       |                                 | FP     | HP:0005506 | Chronic myelogenous leukemia                  |                      | FP     |
| HP:0010783 | Erythema                                      | 1942589                         | TP     | HP:0004820 | Acute myelomonocytic leukemia                 |                      | FP     |
| HP:0000952 | Jaundice                                      | 11798657                        | TP     | HP:0001000 | Abnormality of skin pigmentation              |                      | FP     |
| HP:0005547 | Myeloproliferative disorder                   |                                 | FP     | HP:0001882 | Leukopenia                                    | 2975453              | TP     |
| HP:0011945 | Bronchiolitis obliterans organizing pneumonia |                                 | FP     | HP:0011946 | Bronchiolitis obliterans                      |                      | FP     |
| HP:0001888 | Lymphopenia                                   |                                 | FP     | HP:0001019 | Erythroderma                                  | 17938020             | FN     |
| HP:0001482 | Subcutaneous nodules                          | 9010100                         | FN     | HP:0000988 | Skin rash                                     | 18516870             | FN     |
| HP:0002113 | Pulmonary infiltrates                         | 1321303                         | FN     | HP:0001698 | Pericardial effusion                          | 1658079              | FN     |
| HP:0003401 | Paresthesia                                   | 18035189<br>1662570<br>12350404 | FN     | HP:0002797 | Osteolysis                                    | 16093798             | FN     |
| HP:0001876 | Pancytopenia                                  | 11798657                        | FN     | HP:0001880 | Eosinophilia                                  | 11798657             | FN     |
| HP:0006530 | Interstitial pulmonary disease                | 8331846<br>22578413             | FN     | HP:0002039 | Anorexia                                      | 3204683              | FN     |
| HP:0002014 | Diarrhea                                      | 3204683                         | FN     | HP:0100806 | Sepsis                                        | 16093798             | FN     |
| HP:0001824 | Weight loss                                   | 15148763<br>11257818            | FN     | HP:0010702 | Hypergammaglobulinemia                        | 3067902              | FN     |
| HP:0010628 | Facial palsy                                  | 19684985                        | FN     | HP:0002653 | Bone pain                                     | 9643532              | FN     |
| HP:0002756 | Pathologic fracture                           | 12432996                        | FN     | HP:0200023 | Priapism                                      | 15537405<br>10220081 | FN     |
| HP:0002249 | Melena                                        | 3204683                         | FN     | HP:0011974 | Myelofibrosis                                 | 14715100             | FN     |

*continued on the next page*

**Table S28. Adult T-Cell Leukemia Lymphoma – continued**

| <b>ID</b>  | <b>Name</b> | <b>pmid</b>          | <b>status</b> | <b>ID</b>  | <b>Name</b>               | <b>pmid</b> | <b>status</b> |
|------------|-------------|----------------------|---------------|------------|---------------------------|-------------|---------------|
| HP:0000979 | Purpura     | 17973821<br>23224072 | FN            | HP:0100828 | Increase in T cell number | -           | FN            |



**Table S29.** Overview of HPO annotations for **Plasma Cell Leukemia** that were derived by concept recognition in PubMed using BioLark. There were 14 true positives, 15 false positives, and 10 false negatives.

| ID         | Name                          | pmid                                      | status | ID         | Name                                          | pmid                 | status |
|------------|-------------------------------|-------------------------------------------|--------|------------|-----------------------------------------------|----------------------|--------|
| HP:0006775 | Multiple myeloma              |                                           | FP     | HP:0001909 | Leukemia                                      |                      | FP     |
| HP:0011857 | Plasmacytoma                  | 21229400<br>9750458                       | TP     | HP:0000718 | Aggressive behavior                           |                      | FP     |
| HP:0002665 | Lymphoma                      |                                           | FP     | HP:0001903 | Anemia                                        | 7571482              | TP     |
| HP:0001873 | Thrombocytopenia              | 20391976                                  | TP     | HP:0000083 | Renal insufficiency                           | 11166824             | TP     |
| HP:0002488 | Acute leukemia                |                                           | FP     | HP:0003072 | Hypercalcemia                                 | 11166824             | TP     |
| HP:0002835 | Aspiration                    |                                           | FP     | HP:0005550 | Chronic lymphatic leukemia                    |                      | FP     |
| HP:0002653 | Bone pain                     | 20391976                                  | TP     | HP:0000093 | Proteinuria                                   | 1770327              | TP     |
| HP:0001433 | Hepatosplenomegaly            | 3116673                                   | TP     | HP:0005526 | Lymphoid leukemia                             |                      | FP     |
| HP:0001635 | Congestive heart failure      |                                           | FP     | HP:0006721 | Acute lymphatic leukemia                      |                      | FP     |
| HP:0005508 | Waldenstrom macroglobulinemia |                                           | FP     | HP:0005523 | Lymphoproliferative disorder                  |                      | FP     |
| HP:0010702 | Hypergammaglobulinemia        | 8086511<br>1578643<br>16454587<br>9796403 | TP     | HP:0001974 | Leukocytosis                                  | 1942529              | TP     |
| HP:0011034 | Amyloidosis                   |                                           | FP     | HP:0001324 | Muscle weakness                               |                      | FP     |
| HP:0002202 | Pleural effusion              | 15078773<br>823757                        | TP     | HP:0009824 | Hypoplasia involving bones of the upper limbs |                      | FP     |
| HP:0001744 | Splenomegaly                  | 11166824                                  | TP     | HP:0002716 | Lymphadenopathy                               | 3116673              | TP     |
| HP:0002240 | Hepatomegaly                  | 3116673                                   | TP     | HP:0100806 | Sepsis                                        | 3920242              | FN     |
| HP:0001824 | Weight loss                   | 12185504<br>18854288                      | FN     | HP:0002090 | Pneumonia                                     | 2652343              | FN     |
| HP:0001945 | Fever                         | 16304856                                  | FN     | HP:0100827 | Lymphocytosis                                 | 15938728<br>10774246 | FN     |
| HP:0011974 | Myelofibrosis                 | 403845                                    | FN     | HP:0001919 | Acute renal failure                           | 16844565             | FN     |
| HP:0002797 | Osteolysis                    | 17453381                                  | FN     | HP:0001875 | Neutropenia                                   | 17675269             | FN     |
| HP:0001876 | Pancytopenia                  | 687831                                    | FN     |            |                                               |                      |        |

**Table S30.** Overview of HPO annotations for **Meningioma** that were derived by concept recognition in PubMed using BioLark. There were 17 true positives, 73 false positives, and 47 false negatives.

| ID         | Name                                          | pmid                 | status | ID         | Name                               | pmid               | status |
|------------|-----------------------------------------------|----------------------|--------|------------|------------------------------------|--------------------|--------|
| HP:0002858 | Meningioma                                    | 7079409              | TP     | HP:0100009 | Intracranial meningioma            | 6805281            | TP     |
| HP:0009733 | Glioma                                        |                      | FP     | HP:0100008 | Schwannoma                         |                    | FP     |
| HP:0001287 | Meningitis                                    |                      | FP     | HP:0009588 | Vestibular Schwannoma              |                    | FP     |
| HP:0001067 | Neurofibromas                                 |                      | FP     | HP:0100843 | Glioblastoma                       |                    | FP     |
| HP:0100010 | Spinal meningioma                             | 18485685             | TP     | HP:0000718 | Aggressive behavior                |                    | FP     |
| HP:0002331 | Headache (with pheochromocytoma)              |                      | FP     | HP:0009592 | Astrocytoma                        |                    | FP     |
| HP:0000969 | Edema                                         |                      | FP     | HP:0002893 | Pituitary adenoma                  |                    | FP     |
| HP:0002181 | Cerebral edema                                | 7242894              | TP     | HP:0001250 | Seizures                           |                    | FP     |
| HP:0002888 | Ependymoma                                    |                      | FP     | HP:0010302 | Spinal cord tumor                  |                    | FP     |
| HP:0002885 | Medulloblastoma                               |                      | FP     | HP:0000520 | Proptosis                          |                    | FP     |
| HP:0000246 | Sinusitis                                     |                      | FP     | HP:0001269 | Hemiparesis                        | 12826353           | TP     |
| HP:0100006 | Neoplasm of the central nervous system        |                      | FP     | HP:0010762 | Chordoma                           |                    | FP     |
| HP:0010797 | Hemangioblastoma                              |                      | FP     | HP:0100774 | Hyperostosis                       |                    | FP     |
| HP:0000572 | Visual loss                                   |                      | FP     | HP:0000365 | Hearing impairment                 |                    | FP     |
| HP:0001324 | Muscle weakness                               |                      | FP     | HP:0003002 | Breast carcinoma                   |                    | FP     |
| HP:0000651 | Diplopia                                      | 12826353             | TP     | HP:0010628 | Facial palsy                       | 22236763           | TP     |
| HP:0000505 | Visual impairment                             |                      | FP     | HP:0000529 | Progressive visual loss            | 12812948           | TP     |
| HP:0100661 | Trigeminal neuralgia                          |                      | FP     | HP:0001123 | Visual field defect                |                    | FP     |
| HP:0009734 | Optic glioma                                  |                      | FP     | HP:0100026 | Arteriovenous malformation         |                    | FP     |
| HP:0000648 | Optic atrophy                                 |                      | FP     | HP:0004944 | Cerebral aneurysm                  |                    | FP     |
| HP:0002617 | Aneurysm                                      |                      | FP     | HP:0002321 | Vertigo                            | 12826353           | TP     |
| HP:0002835 | Aspiration                                    |                      | FP     | HP:0010799 | Pinealoma                          |                    | FP     |
| HP:0001085 | Papilledema                                   | 11018836             | TP     | HP:0002668 | Paraganglioma                      |                    | FP     |
| HP:0007807 | Optic nerve compression                       | 17019421             | TP     | HP:0011750 | Neoplasm of the anterior pituitary |                    | FP     |
| HP:0001138 | Optic neuropathy                              |                      | FP     | HP:0001048 | Cavernous hemangioma               |                    | FP     |
| HP:0000360 | Tinnitus                                      | 12836076             | TP     | HP:0001362 | Skull defect                       |                    | FP     |
| HP:0009792 | Teratoma                                      |                      | FP     | HP:0002138 | Subarachnoid hemorrhage            | 1664596<br>1085038 | TP     |
| HP:0001028 | Hemangioma                                    |                      | FP     | HP:0009589 | Bilateral vestibular Schwannoma    |                    | FP     |
| HP:0000822 | Hypertension                                  |                      | FP     | HP:0200022 | Choroid plexus papilloma           |                    | FP     |
| HP:0006765 | Chondrosarcoma                                |                      | FP     | HP:0009830 | Peripheral neuropathy              |                    | FP     |
| HP:0005584 | Renal cell carcinoma                          |                      | FP     | HP:0001297 | Stroke                             |                    | FP     |
| HP:0003881 | Humeral sclerosis                             |                      | FP     | HP:0000458 | Anosmia                            | 21840726           | TP     |
| HP:0002170 | Intracranial hemorrhage                       |                      | FP     | HP:0004947 | Arteriovenous fistula              |                    | FP     |
| HP:0001342 | Cerebral hemorrhage                           |                      | FP     | HP:0000508 | Ptosis                             | 20148271           | TP     |
| HP:0010828 | Hemifacial spasm                              | 11346028             | TP     | HP:0100646 | Thyroiditis                        |                    | FP     |
| HP:0002013 | Vomiting                                      |                      | FP     | HP:0100608 | Metrorrhagia                       |                    | FP     |
| HP:0009797 | Cholesteatoma                                 |                      | FP     | HP:0100309 | Subdural hemorrhage                | 1327621            | TP     |
| HP:0009824 | Hypoplasia involving bones of the upper limbs |                      | FP     | HP:0000265 | Mastoiditis                        |                    | FP     |
| HP:0100699 | Scarring                                      |                      | FP     | HP:0000602 | Ophthalmoplegia                    |                    | FP     |
| HP:0100246 | Osteoma                                       |                      | FP     | HP:0000024 | Prostatitis                        |                    | FP     |
| HP:0003001 | Glomus jugular tumor                          |                      | FP     | HP:0000873 | Diabetes insipidus                 |                    | FP     |
| HP:0100310 | Epidural hemorrhage                           |                      | FP     | HP:0006880 | Cerebellar hemangioblastoma        |                    | FP     |
| HP:0001291 | Abnormality of the cranial nerves             |                      | FP     | HP:0011695 | Cerebellar hemorrhage              |                    | FP     |
| HP:0009718 | Subependymal giant-cell astrocytoma           |                      | FP     | HP:0100634 | Neuroendocrine neoplasm            |                    | FP     |
| HP:0100570 | Carcinoid                                     |                      | FP     | HP:0009590 | Unilateral vestibular Schwannoma   |                    | FP     |
| HP:0005758 | Foramen magnum lesion                         | 2711319              | FN     | HP:0002423 | Long-tract signs                   | 22430127           | FN     |
| HP:0000543 | Optic disc pallor                             | 17548990<br>18421411 | FN     | HP:0002512 | Brain stem compression             | 20148271           | FN     |

*continued on the next page*

**Table S30. Meningioma – continued**

| <b>ID</b>  | <b>Name</b>                   | <b>pmid</b>          | <b>status</b> | <b>ID</b>  | <b>Name</b>                    | <b>pmid</b>                  | <b>status</b> |
|------------|-------------------------------|----------------------|---------------|------------|--------------------------------|------------------------------|---------------|
| HP:0004840 | Hypochromic microcytic anemia | 9452243<br>18987835  | FN            | HP:0001285 | Spastic tetraparesis           | 3885068                      | FN            |
| HP:0002078 | Truncal ataxia                | 11561352             | FN            | HP:0009916 | Anisocoria                     | 16331147                     | FN            |
| HP:0001133 | Constricted visual fields     | 7474790              | FN            | HP:0010534 | Transient global amnesia       | 3990976<br>21629022          | FN            |
| HP:0011349 | Abducens palsy                | 8677007<br>835387    | FN            | HP:0004409 | Hyposmia                       | 6449061                      | FN            |
| HP:0010523 | Alexia                        | 12826353             | FN            | HP:0000603 | Central scotoma                | 16793428<br>7132192          | FN            |
| HP:0001293 | Cranial nerve compression     | 16331147<br>16455530 | FN            | HP:0003487 | Babinski sign                  | 8677007                      | FN            |
| HP:0002312 | Clumsiness                    | 3885068<br>12233093  | FN            | HP:0000871 | Panhypopituitarism             | 8986165                      | FN            |
| HP:0002317 | Unsteady gait                 | 7520545              | FN            | HP:0007340 | Lower limb muscle weakness     | 16850962                     | FN            |
| HP:0002357 | Dysphasia                     | 7335302              | FN            | HP:0001334 | Communicating hydrocephalus    | 16776435<br>8205731          | FN            |
| HP:0010532 | Paroxysmal vertigo            | 9560091              | FN            | HP:0002355 | Difficulty walking             | 18548187                     | FN            |
| HP:0002073 | Progressive cerebellar ataxia | 3704430              | FN            | HP:0001730 | Progressive hearing impairment | 16792549                     | FN            |
| HP:0010524 | Agnosia                       | 7566392              | FN            | HP:0002066 | Gait ataxia                    | 12826353                     | FN            |
| HP:0002273 | Tetraparesis                  | 16917615             | FN            | HP:0002367 | Visual hallucinations          | 8729606                      | FN            |
| HP:0002427 | Motor aphasia                 | 2325489              | FN            | HP:0002277 | Horner syndrome                | 23230622                     | FN            |
| HP:0002313 | Spastic paraparesis           | 3249615              | FN            | HP:0002318 | Cervical myelopathy            | 2253423                      | FN            |
| HP:0001347 | Hyperreflexia                 | 18080720             | FN            | HP:0000751 | Personality changes            | 11386827                     | FN            |
| HP:0002301 | Hemiplegia                    | 17021731             | FN            | HP:0001260 | Dysarthria                     | 9736091                      | FN            |
| HP:0002176 | Spinal cord compression       | 12820045             | FN            | HP:0002353 | EEG abnormality                | 3990976<br>426936<br>1189455 | FN            |
| HP:0002797 | Osteolysis                    | 22836795             | FN            | HP:0002381 | Aphasia                        | 12826353                     | FN            |
| HP:0000639 | Nystagmus                     | 3871599              | FN            | HP:0007359 | Focal seizures                 | -                            | FN            |
| HP:0000975 | Hyperhidrosis                 | 6453259<br>12691806  | FN            | HP:0002197 | Generalized seizures           | 16910461                     | FN            |
| HP:0002354 | Memory impairment             | 23359077             | FN            |            |                                |                              |               |

**Table S31.** Overview of HPO annotations for **Budd-Chiari Syndrome** that were derived by concept recognition in PubMed using BioLark. There were 21 true positives, 32 false positives, and 7 false negatives.

| ID         | Name                                   | pmid                | status | ID         | Name                                  | pmid                             | status |
|------------|----------------------------------------|---------------------|--------|------------|---------------------------------------|----------------------------------|--------|
| HP:0002639 | Budd-Chiari syndrome                   | -                   | TP     | HP:0001541 | Ascites                               | 4058415                          | TP     |
| HP:0001409 | Portal hypertension                    | 18618075            | TP     | HP:0001394 | Cirrhosis                             |                                  | FP     |
| HP:0002240 | Hepatomegaly                           | 9462648             | TP     | HP:0100724 | Hypercoagulability                    |                                  | FP     |
| HP:0004936 | Venous thrombosis                      |                     | FP     | HP:0005547 | Myeloproliferative disorder           |                                  | FP     |
| HP:0001399 | Hepatic failure                        |                     | FP     | HP:0002619 | Varicose veins                        |                                  | FP     |
| HP:0001901 | Polycythemia                           |                     | FP     | HP:0002027 | Abdominal pain                        | 15695963                         | TP     |
| HP:0001402 | Hepatocellular carcinoma               | 9828703             | TP     | HP:0004818 | Paroxysmal nocturnal hemoglobinuria   |                                  | FP     |
| HP:0002040 | Esophageal varices                     | 12107787            | TP     | HP:0006554 | Acute hepatic failure                 | 2069474                          | TP     |
| HP:0002204 | Pulmonary embolism                     |                     | FP     | HP:0001894 | Thrombocytosis                        |                                  | FP     |
| HP:0000969 | Edema                                  | 4012606             | TP     | HP:0001744 | Splenomegaly                          | 12848215                         | TP     |
| HP:0001410 | Decreased liver function               | -                   | TP     | HP:0005543 | Reduced protein C activity            |                                  | FP     |
| HP:0003270 | Abdominal distention                   | 16295731            | TP     | HP:0002308 | Arnold-Chiari malformation            |                                  | FP     |
| HP:0002239 | Gastrointestinal hemorrhage            |                     | FP     | HP:0001433 | Hepatosplenomegaly                    | 1797212                          | TP     |
| HP:0000952 | Jaundice                               | 20387679            | TP     | HP:0001298 | Encephalopathy                        |                                  | FP     |
| HP:0003396 | Syringomyelia                          |                     | FP     | HP:0002910 | Elevated hepatic transaminases        | 19560555                         | TP     |
| HP:0003613 | Antiphospholipid antibody positivity   |                     | FP     | HP:0004420 | Arterial thrombosis                   |                                  | FP     |
| HP:0002605 | Hepatic necrosis                       |                     | FP     | HP:0100243 | Leiomyosarcoma                        |                                  | FP     |
| HP:0004855 | Reduced protein S activity             |                     | FP     | HP:0004419 | Recurrent thrombophlebitis            | 23373054                         | TP     |
| HP:0001976 | Reduced antithrombin III activity      |                     | FP     | HP:0002625 | Deep venous thrombosis                |                                  | FP     |
| HP:0001907 | Thromboembolism                        |                     | FP     | HP:0010741 | Edema of the lower limbs              | 4058415                          | TP     |
| HP:0006580 | Portal fibrosis                        | 16534866            | TP     | HP:0100523 | Liver abscess                         |                                  | FP     |
| HP:0003256 | Abnormality of the coagulation cascade |                     | FP     | HP:0100806 | Sepsis                                |                                  | FP     |
| HP:0001395 | Hepatic fibrosis                       | 8900915             | TP     | HP:0004448 | Fulminant hepatic failure             | 9399778                          | TP     |
| HP:0011874 | Heparin-induced thrombocytopenia       |                     | FP     | HP:0002633 | Vasculitis                            |                                  | FP     |
| HP:0001873 | Thrombocytopenia                       |                     | FP     | HP:0002202 | Pleural effusion                      |                                  | FP     |
| HP:0002248 | Hematemesis                            | 15185028            | TP     | HP:0000718 | Aggressive behavior                   |                                  | FP     |
| HP:0005521 | Disseminated intravascular coagulation |                     | FP     | HP:0003645 | Prolonged partial thromboplastin time | 12696825                         | FN     |
| HP:0001971 | Hypersplenism                          | 16534866            | FN     | HP:0002480 | Hepatic encephalopathy                | 15095845                         | FN     |
| HP:0003073 | Hypoalbuminemia                        | 9519690<br>3197587  | FN     | HP:0006846 | Acute encephalopathy                  | 16318042<br>1008048<br>2162656   | FN     |
| HP:0003155 | Elevated alkaline phosphatase          | 23143028<br>7724132 | FN     | HP:0002904 | Hyperbilirubinemia                    | 20112074<br>21074693<br>17763380 | FN     |

**Table S32.** Overview of HPO annotations for **Celiac Disease** that were derived by concept recognition in PubMed using BioLark. There were 30 true positives, 63 false positives, and 51 false negatives.

| ID         | Name                                | pmid     | status | ID         | Name                              | pmid               | status |
|------------|-------------------------------------|----------|--------|------------|-----------------------------------|--------------------|--------|
| HP:0002608 | Celiac disease                      | -        | TP     | HP:0011473 | Villous atrophy                   | 21901262           | TP     |
| HP:0002024 | Malabsorption                       | -        | TP     | HP:0002960 | Autoimmunity                      | -                  | TP     |
| HP:0002242 | Abnormality of the intestine        | -        | TP     | HP:0002570 | Steatorrhea                       | 6523389            | TP     |
| HP:0000964 | Eczema                              |          | FP     | HP:0002014 | Diarrhea                          | -                  | TP     |
| HP:0002720 | IgA deficiency                      |          | FP     | HP:0001903 | Anemia                            |                    | FP     |
| HP:0002665 | Lymphoma                            |          | FP     | HP:0100280 | Crohn's disease                   |                    | FP     |
| HP:0001824 | Weight loss                         |          | FP     | HP:0001738 | Exocrine pancreatic insufficiency |                    | FP     |
| HP:0002037 | Inflammation of the large intestine |          | FP     | HP:0002028 | Chronic diarrhea                  | -                  | TP     |
| HP:0002027 | Abdominal pain                      | -        | TP     | HP:0004395 | Malnutrition                      |                    | FP     |
| HP:0001733 | Pancreatitis                        |          | FP     | HP:0100279 | Ulcerative colitis                |                    | FP     |
| HP:0000939 | Osteoporosis                        | -        | TP     | HP:0000820 | Abnormality of the thyroid gland  |                    | FP     |
| HP:0100651 | Type I diabetes mellitus            |          | FP     | HP:0004322 | Short stature                     |                    | FP     |
| HP:0001891 | Iron deficiency anemia              | 17325959 | TP     | HP:0000819 | Diabetes mellitus                 |                    | FP     |
| HP:0000737 | Irritability                        |          | FP     | HP:0006280 | Chronic pancreatitis              |                    | FP     |
| HP:0100646 | Thyroiditis                         |          | FP     | HP:0000938 | Osteopenia                        | 11560797           | TP     |
| HP:0001508 | Failure to thrive                   | -        | TP     | HP:0001984 | Intolerance to protein            |                    | FP     |
| HP:0002583 | Colitis                             |          | FP     | HP:0001510 | Growth delay                      |                    | FP     |
| HP:0001251 | Ataxia                              |          | FP     | HP:0001250 | Seizures                          |                    | FP     |
| HP:0003270 | Abdominal distention                | 18060282 | TP     | HP:0003261 | Increased IgA level               |                    | FP     |
| HP:0002613 | Biliary cirrhosis                   |          | FP     | HP:0001548 | Overgrowth                        |                    | FP     |
| HP:0100827 | Lymphocytosis                       |          | FP     | HP:0002019 | Constipation                      |                    | FP     |
| HP:0002749 | Osteomalacia                        | 22593794 | TP     | HP:0001324 | Muscle weakness                   |                    | FP     |
| HP:0009830 | Peripheral neuropathy               | -        | TP     | HP:0004789 | Lactose intolerance               | 25072743           | TP     |
| HP:0000821 | Hypothyroidism                      |          | FP     | HP:0002514 | Cerebral calcification            | 7558773<br>9822844 | TP     |
| HP:0001370 | Rheumatoid arthritis                |          | FP     | HP:0000789 | Infertility                       | -                  | TP     |
| HP:0004315 | IgG deficiency                      |          | FP     | HP:0002630 | Fat malabsorption                 | 21447770           | TP     |
| HP:0008207 | Primary adrenal insufficiency       |          | FP     | HP:0011107 | Recurrent aphthous stomatitis     | 17919276           | TP     |
| HP:0002725 | Systemic lupus erythematosus        |          | FP     | HP:0002721 | Immunodeficiency                  |                    | FP     |
| HP:0000740 | Anxiety (with pheochromocytoma)     |          | FP     | HP:0005268 | Spontaneous abortion              |                    | FP     |
| HP:0001513 | Obesity                             |          | FP     | HP:0100512 | Vitamin D deficiency              | 23328299           | TP     |
| HP:0000867 | Secondary hyperparathyroidism       | 20387675 | TP     | HP:0001369 | Arthritis                         |                    | FP     |
| HP:0000872 | Hashimoto thyroiditis               |          | FP     | HP:0003881 | Humeral sclerosis                 |                    | FP     |
| HP:0003765 | Psoriasis                           |          | FP     | HP:0100647 | Graves disease                    |                    | FP     |
| HP:0003159 | Hyperoxaluria                       | 835313   | TP     | HP:0003073 | Hypoalbuminemia                   |                    | FP     |
| HP:0002835 | Aspiration                          |          | FP     | HP:0002527 | Falls                             |                    | FP     |
| HP:0100753 | Schizophrenia                       |          | FP     | HP:0000823 | Delayed puberty                   | 8338991            | TP     |
| HP:0005229 | Jejunoleal ulceration               | 16292096 | TP     | HP:0100327 | Cow milk allergy                  |                    | FP     |
| HP:0005505 | Refractory anemia                   | 17704578 | TP     | HP:0002239 | Gastrointestinal hemorrhage       | 8602182            | TP     |
| HP:0005202 | Helicobacter pylori infection       |          | FP     | HP:0004332 | Abnormality of lymphocytes        |                    | FP     |
| HP:0007354 | Amyotrophic lateral sclerosis       |          | FP     | HP:0005681 | Juvenile rheumatoid arthritis     |                    | FP     |
| HP:0004313 | Hypogammaglobulinemia               |          | FP     | HP:0002757 | Recurrent fractures               | 12867795           | TP     |
| HP:0004325 | Decreased body weight               |          | FP     | HP:0000836 | Hyperthyroidism                   |                    | FP     |
| HP:0003198 | Myopathy                            | 15389648 | TP     | HP:0001518 | Small for gestational age         |                    | FP     |
| HP:0000794 | IgA nephropathy                     |          | FP     | HP:0001945 | Fever                             |                    | FP     |

*continued on the next page*

**Table S32. Celiac Disease – continued**

| ID         | Name                               | pmid                 | status | ID         | Name                                 | pmid                            | status |
|------------|------------------------------------|----------------------|--------|------------|--------------------------------------|---------------------------------|--------|
| HP:0002331 | Headache (with pheochromocytoma)   |                      | FP     | HP:0000980 | Pallor                               |                                 | FP     |
| HP:0001047 | Atopic dermatitis                  |                      | FP     | HP:0000975 | Hyperhidrosis                        |                                 | FP     |
| HP:0000853 | Goiter                             |                      | FP     | HP:0004385 | Protracted diarrhea                  | 7714682                         | FN     |
| HP:0005265 | Abnormality of the jejunum         | 6391982              | FN     | HP:0002041 | Intractable diarrhea                 | 24355936                        | FN     |
| HP:0004840 | Hypochromic microcytic anemia      | 8956178              | FN     | HP:0003146 | Hypocholesterolemia                  | 16945614                        | FN     |
| HP:0002750 | Delayed skeletal maturation        | 19201117             | FN     | HP:0007141 | Sensorimotor neuropathy              | 9416814                         | FN     |
| HP:0006297 | Hypoplasia of dental enamel        | 10883318<br>20540401 | FN     | HP:0011892 | Vitamin K deficiency                 | 17768663                        | FN     |
| HP:0002243 | Protein-losing enteropathy         | 619623               | FN     | HP:0000869 | Secondary amenorrhea                 | 11150866                        | FN     |
| HP:0002574 | Episodic abdominal pain            | 4085741              | FN     | HP:0001972 | Macrocytic anemia                    | 20455043                        | FN     |
| HP:0008151 | Prolonged prothrombin time         | 16093880             | FN     | HP:0003075 | Hypoproteinemia                      | 14074696<br>15125378            | FN     |
| HP:0011856 | Pica                               | 2305699              | FN     | HP:0002073 | Progressive cerebellar ataxia        | 19622110                        | FN     |
| HP:0005897 | Severe osteoporosis                | 21611842             | FN     | HP:0003701 | Proximal muscle weakness             | 12439125                        | FN     |
| HP:0002229 | Alopecia areata                    | 12603809             | FN     | HP:0002584 | Intestinal bleeding                  | 12664131                        | FN     |
| HP:0100513 | Vitamin E deficiency               | 16100995             | FN     | HP:0002672 | Gastrointestinal carcinoma           | 19408741                        | FN     |
| HP:0002917 | Hypomagnesemia                     | 16358091             | FN     | HP:0003477 | Peripheral axonal neuropathy         | 16835287                        | FN     |
| HP:0002748 | Rickets                            | 11132463             | FN     | HP:0002580 | Volvulus                             | 9587089                         | FN     |
| HP:0002576 | Intussusception                    | 9464437<br>11003969  | FN     | HP:0004326 | Cachexia                             | 12368936                        | FN     |
| HP:0002900 | Hypokalemia                        | 21525142             | FN     | HP:0003613 | Antiphospholipid antibody positivity | 21839587                        | FN     |
| HP:0002459 | Dysautonomia                       | 16967315             | FN     | HP:0000141 | Amenorrhea                           | 20359791                        | FN     |
| HP:0002901 | Hypocalcemia                       | 7088767<br>22593794  | FN     | HP:0001336 | Myoclonus                            | 3504245<br>16638509<br>22225790 | FN     |
| HP:0003401 | Paresthesia                        | 12771245             | FN     | HP:0011459 | Esophageal carcinoma                 | 8783767                         | FN     |
| HP:0002240 | Hepatomegaly                       | 12685387             | FN     | HP:0002196 | Myelopathy                           | 12151653                        | FN     |
| HP:0003493 | Antinuclear antibody positivity    | 8293004              | FN     | HP:0001271 | Polyneuropathy                       | 15389648                        | FN     |
| HP:0003326 | Myalgia                            | 22138844             | FN     | HP:0002829 | Arthralgia                           | 11907355                        | FN     |
| HP:0001744 | Splenomegaly                       | 23619270<br>16175383 | FN     | HP:0000554 | Uveitis                              | 22408231                        | FN     |
| HP:0000802 | Impotence                          | 20017709             | FN     | HP:0001397 | Hepatic steatosis                    | 23315648                        | FN     |
| HP:0002244 | Abnormality of the small intestine | -                    | FN     | HP:0004349 | Reduced bone mineral density         | -                               | FN     |
| HP:0004386 | Gastrointestinal inflammation      | -                    | FN     | HP:0011458 | Abdominal symptom                    | -                               | FN     |

**Table S33.** Overview of HPO annotations for **Acute Cholecystitis** that were derived by concept recognition in PubMed using BioLark. There were 9 true positives, 4 false positives, and 8 false negatives.

| ID         | Name                          | pmid     | status | ID         | Name                              | pmid     | status |
|------------|-------------------------------|----------|--------|------------|-----------------------------------|----------|--------|
| HP:0001082 | Cholecystitis                 | -        | TP     | HP:0001081 | Cholelithiasis                    | -        | TP     |
| HP:0100758 | Gangrene                      | 23132628 | TP     | HP:0002027 | Abdominal pain                    | 22872303 | TP     |
| HP:0001735 | Acute pancreatitis            |          | FP     | HP:0001945 | Fever                             | 22872303 | TP     |
| HP:0000952 | Jaundice                      | 19691802 | TP     | HP:0002586 | Peritonitis                       | 17252294 | TP     |
| HP:0100806 | Sepsis                        | 17203529 | TP     | HP:0001733 | Pancreatitis                      |          | FP     |
| HP:0001974 | Leukocytosis                  | 23340953 | TP     | HP:0002835 | Aspiration                        |          | FP     |
| HP:0001513 | Obesity                       |          | FP     | HP:0002910 | Elevated hepatic transaminases    | 19275859 | FN     |
| HP:0005609 | Gallbladder dysfunction       | 17252300 | FN     | HP:0005230 | Biliary tract obstruction         | 23271073 | FN     |
| HP:0003155 | Elevated alkaline phosphatase | 21876567 | FN     | HP:0002013 | Vomiting                          | 22153541 | FN     |
| HP:0001396 | Cholestasis                   | 17427067 | FN     | HP:0011227 | Elevated C-reactive protein level | 22872303 | FN     |
| HP:0002018 | Nausea                        | 25239990 | FN     |            |                                   |          |        |

**Table S34.** Overview of HPO annotations for **Duodenogastric Reflux** that were derived by concept recognition in PubMed using BioLark. There were 13 true positives, 8 false positives, and 4 false negatives.

| ID         | Name                       | pmid     | status | ID         | Name                          | pmid     | status |
|------------|----------------------------|----------|--------|------------|-------------------------------|----------|--------|
| HP:0002020 | Gastroesophageal reflux    | 14518219 | TP     | HP:0100633 | Esophagitis                   | 19662586 | TP     |
| HP:0005263 | Gastritis                  | -        | TP     | HP:0002592 | Gastric ulcer                 | 6690637  | TP     |
| HP:0002588 | Duodenal ulcer             | 20458957 | TP     | HP:0100580 | Barrett esophagus             | 19662586 | TP     |
| HP:0002835 | Aspiration                 |          | FP     | HP:0005231 | Chronic gastritis             | 22289498 | TP     |
| HP:0001733 | Pancreatitis               |          | FP     | HP:0004398 | Peptic ulcer                  | 11396533 | TP     |
| HP:0001081 | Cholelithiasis             |          | FP     | HP:0005202 | Helicobacter pylori infection |          | FP     |
| HP:0002582 | Chronic atrophic gastritis | 1397852  | TP     | HP:0002013 | Vomiting                      | 17245178 | TP     |
| HP:0002017 | Nausea and vomiting        | -        | TP     | HP:0011459 | Esophageal carcinoma          | 15102519 | TP     |
| HP:0004791 | Esophageal ulceration      |          | FP     | HP:0001082 | Cholecystitis                 |          | FP     |
| HP:0002860 | Squamous cell carcinoma    |          | FP     | HP:0002027 | Abdominal pain                | 8674397  | TP     |
| HP:0002578 | Gastroparesis              |          | FP     | HP:0006753 | Neoplasm of the stomach       | 12429172 | FN     |
| HP:0003270 | Abdominal distention       | 19099725 | FN     | HP:0100751 | Esophageal neoplasm           | -        | FN     |
| HP:0002018 | Nausea                     | 3863229  | FN     |            |                               |          |        |



**Table S35.** Overview of HPO annotations for **Acute Necrotizing Pancreatitis** that were derived by concept recognition in PubMed using BioLark. There were 19 true positives, 17 false positives, and 21 false negatives.

| ID         | Name                                   | pmid                             | status | ID         | Name                              | pmid                                                     | status |
|------------|----------------------------------------|----------------------------------|--------|------------|-----------------------------------|----------------------------------------------------------|--------|
| HP:0001735 | Acute pancreatitis                     | -                                | TP     | HP:0001733 | Pancreatitis                      |                                                          | FP     |
| HP:0000789 | Infertility                            |                                  | FP     | HP:0005206 | Pancreatic pseudocyst             | 23268585                                                 | TP     |
| HP:0100806 | Sepsis                                 | 12748429                         | TP     | HP:0006280 | Chronic pancreatitis              |                                                          | FP     |
| HP:0002027 | Abdominal pain                         | 11847949                         | TP     | HP:0002586 | Peritonitis                       |                                                          | FP     |
| HP:0001081 | Cholelithiasis                         |                                  | FP     | HP:0100844 | Pancreatic fistula                | 17516324<br>23386143<br>21253397                         | TP     |
| HP:0001541 | Ascites                                | 17516324                         | TP     | HP:0000969 | Edema                             |                                                          | FP     |
| HP:0100027 | Recurrent pancreatitis                 |                                  | FP     | HP:0000718 | Aggressive behavior               |                                                          | FP     |
| HP:0000083 | Renal insufficiency                    | 19262525                         | TP     | HP:0100819 | Intestinal fistula                | 23386143                                                 | TP     |
| HP:0001945 | Fever                                  | 23286256<br>10430383             | TP     | HP:0002098 | Respiratory distress              | 17533079                                                 | TP     |
| HP:0002155 | Hypertriglyceridemia                   |                                  | FP     | HP:0002093 | Respiratory insufficiency         |                                                          | FP     |
| HP:0001919 | Acute renal failure                    | 16282052                         | TP     | HP:0002013 | Vomiting                          | 17219076<br>18716785<br>16106939                         | TP     |
| HP:0002615 | Hypotension                            | 17106218                         | TP     | HP:0002202 | Pleural effusion                  | 17516324                                                 | TP     |
| HP:0000952 | Jaundice                               |                                  | FP     | HP:0001974 | Leukocytosis                      | 18981549                                                 | TP     |
| HP:0002239 | Gastrointestinal hemorrhage            | 16282052                         | TP     | HP:0003270 | Abdominal distention              | 15239271                                                 | TP     |
| HP:0001738 | Exocrine pancreatic insufficiency      |                                  | FP     | HP:0003077 | Hyperlipidemia                    |                                                          | FP     |
| HP:0002090 | Pneumonia                              |                                  | FP     | HP:0004872 | Incisional hernia                 |                                                          | FP     |
| HP:0000819 | Diabetes mellitus                      | -                                | TP     | HP:0001873 | Thrombocytopenia                  |                                                          | FP     |
| HP:0001899 | Increased hematocrit                   | 12123089<br>18596637             | TP     | HP:0002625 | Deep venous thrombosis            |                                                          | FP     |
| HP:0002574 | Episodic abdominal pain                | 19822503                         | FN     | HP:0010444 | Pulmonary insufficiency           | 20461065                                                 | FN     |
| HP:0003073 | Hypoalbuminemia                        | 16282052                         | FN     | HP:0011106 | Hypovolemia                       | 17163376                                                 | FN     |
| HP:0002595 | Ileus                                  | 16768334<br>19822503             | FN     | HP:0002901 | Hypocalcemia                      | 12608652<br>19696761<br>15007192<br>22049070<br>18405600 | FN     |
| HP:0005521 | Disseminated intravascular coagulation | 15998382<br>12001677<br>15782108 | FN     | HP:0002910 | Elevated hepatic transaminases    | 22825263<br>19800984<br>9882816                          | FN     |
| HP:0100598 | Pulmonary edema                        | 1101836                          | FN     | HP:0001399 | Hepatic failure                   | 17444596                                                 | FN     |
| HP:0003074 | Hyperglycemia                          | 15627657                         | FN     | HP:0001298 | Encephalopathy                    | 18334145<br>18405600                                     | FN     |
| HP:0001824 | Weight loss                            | 19696761                         | FN     | HP:0100592 | Peritoneal abscess                | 11036297                                                 | FN     |
| HP:0002570 | Steatorrhea                            | 16895491<br>14707732             | FN     | HP:0003075 | Hypoproteinemia                   | 20517265                                                 | FN     |
| HP:0003418 | Back pain                              | 15911961                         | FN     | HP:0002590 | Paralytic ileus                   | 18759203                                                 | FN     |
| HP:0006846 | Acute encephalopathy                   | 17879709                         | FN     | HP:0011227 | Elevated C-reactive protein level | 16145344                                                 | FN     |
| HP:0100732 | Pancreatic fibrosis                    | 9445116                          | FN     |            |                                   |                                                          |        |

**Table S36.** Overview of HPO annotations for **Epididymitis** that were derived by concept recognition in PubMed using BioLark. There were 9 true positives, 20 false positives, and 2 false negatives.

| ID         | Name                          | pmid              | status | ID         | Name                               | pmid     | status |
|------------|-------------------------------|-------------------|--------|------------|------------------------------------|----------|--------|
| HP:0000031 | Epididymitis                  | 22787516          | TP     | HP:0100796 | Orchitis                           |          | FP     |
| HP:0100813 | Testicular torsion            |                   | FP     | HP:0000024 | Prostatitis                        |          | FP     |
| HP:0000789 | Infertility                   |                   | FP     | HP:0000010 | Recurrent urinary tract infections |          | FP     |
| HP:0001945 | Fever                         | 16294792          | TP     | HP:0000029 | Testicular atrophy                 | 3534264  | TP     |
| HP:0003251 | Male infertility              | 23482360          | TP     | HP:0010788 | Testicular neoplasm                |          | FP     |
| HP:0002835 | Aspiration                    |                   | FP     | HP:0000969 | Edema                              |          | FP     |
| HP:0011962 | Obstructive azoospermia       | 15064321          | TP     | HP:0002633 | Vasculitis                         |          | FP     |
| HP:0100790 | Hernia                        |                   | FP     | HP:0000027 | Azoospermia                        | 2120839  | TP     |
| HP:0000798 | Oligospermia                  | 9542967           | TP     | HP:0000028 | Cryptorchidism                     |          | FP     |
| HP:0002960 | Autoimmunity                  |                   | FP     | HP:0100518 | Dysuria                            | 22787516 | TP     |
| HP:0000979 | Purpura                       |                   | FP     | HP:0010783 | Erythema                           | 3788880  | TP     |
| HP:0002721 | Immunodeficiency              |                   | FP     | HP:0100806 | Sepsis                             |          | FP     |
| HP:0002719 | Recurrent infections          |                   | FP     | HP:0200023 | Priapism                           |          | FP     |
| HP:0008222 | Female infertility            |                   | FP     | HP:0000796 | Urethral obstruction               |          | FP     |
| HP:0000041 | Chordee                       |                   | FP     | HP:0001974 | Leukocytosis                       | 18329081 | FN     |
| HP:0009714 | Abnormality of the epididymis | 618030<br>8520650 | FN     |            |                                    |          |        |

**Table S37.** Overview of HPO annotations for **Spermatic Cord Torsion** that were derived by concept recognition in PubMed using BioLark. There were 5 true positives, 15 false positives, and 8 false negatives.

| ID         | Name                      | pmid     | status | ID         | Name                       | pmid                 | status |
|------------|---------------------------|----------|--------|------------|----------------------------|----------------------|--------|
| HP:0100813 | Testicular torsion        | 4087084  | TP     | HP:0000031 | Epididymitis               |                      | FP     |
| HP:0100796 | Orchitis                  |          | FP     | HP:0000028 | Cryptorchidism             |                      | FP     |
| HP:0000029 | Testicular atrophy        | 4087084  | TP     | HP:0000789 | Infertility                |                      | FP     |
| HP:0000969 | Edema                     |          | FP     | HP:0100790 | Hernia                     |                      | FP     |
| HP:0000023 | Inguinal hernia           |          | FP     | HP:0100758 | Gangrene                   | 5007848              | TP     |
| HP:0003251 | Male infertility          | 3090760  | TP     | HP:0002027 | Abdominal pain             | 11019377<br>21903353 | TP     |
| HP:0010788 | Testicular neoplasm       |          | FP     | HP:0010470 | Supernumerary testes       |                      | FP     |
| HP:0002017 | Nausea and vomiting       |          | FP     | HP:0000979 | Purpura                    |                      | FP     |
| HP:0000035 | Abnormality of the testis |          | FP     | HP:0008733 | Dysplastic testes          |                      | FP     |
| HP:0000053 | Macroorchidism            |          | FP     | HP:0008720 | Primary testicular failure |                      | FP     |
| HP:0000798 | Oligospermia              | 3090760  | FN     | HP:0008669 | Impaired spermatogenesis   | 3090760              | FN     |
| HP:0000802 | Impotence                 | 16138584 | FN     | HP:0010783 | Erythema                   | 10999695             | FN     |
| HP:0002013 | Vomiting                  | 21490540 | FN     | HP:0001945 | Fever                      | 11019377<br>21903353 | FN     |
| HP:0008734 | Decreased testicular size | 6776291  | FN     | HP:0000027 | Azoospermia                | 16138584             | FN     |

**Table S38.** Overview of HPO annotations for **Uterine Inversion** that were derived by concept recognition in PubMed using BioLark. There were 2 true positives, 7 false positives, and 4 false negatives.

| ID         | Name                       | pmid     | status | ID         | Name                   | pmid     | status |
|------------|----------------------------|----------|--------|------------|------------------------|----------|--------|
| HP:0100242 | Sarcoma                    |          | FP     | HP:0100718 | Uterine rupture        |          | FP     |
| HP:0000139 | Uterine prolapse           | 2647797  | TP     | HP:0000016 | Urinary retention      |          | FP     |
| HP:0002027 | Abdominal pain             | 17197359 | TP     | HP:0100519 | Anuria                 |          | FP     |
| HP:0006743 | Embryonal rhabdomyosarcoma |          | FP     | HP:0000718 | Aggressive behavior    |          | FP     |
| HP:0000131 | Uterine leiomyoma          |          | FP     | HP:0011891 | Post-partum hemorrhage | 12464994 | FN     |
| HP:0011106 | Hypovolemia                | 15228824 | FN     | HP:0100608 | Metrorrhagia           | 11848030 | FN     |
| HP:0001892 | Abnormal bleeding          | 17578377 | FN     |            |                        |          |        |

**Table S39.** Overview of HPO annotations for **Nephrogenic Diabetes Insipidus** that were derived by concept recognition in PubMed using BioLark. There were 11 true positives, 12 false positives, and 10 false negatives.

| ID         | Name                           | pmid                 | status | ID         | Name                          | pmid                 | status |
|------------|--------------------------------|----------------------|--------|------------|-------------------------------|----------------------|--------|
| HP:0009806 | Nephrogenic diabetes insipidus | -                    | TP     | HP:0000103 | Polyuria                      | 22503803             | TP     |
| HP:0001959 | Polydipsia                     | 22503803             | TP     | HP:0001944 | Dehydration                   | 9831428              | TP     |
| HP:0003228 | Hypernatremia                  | 18715941             | TP     | HP:0000863 | Central diabetes insipidus    |                      | FP     |
| HP:0007302 | Bipolar affective disorder     |                      | FP     | HP:0000873 | Diabetes insipidus            |                      | FP     |
| HP:0003158 | Hypothenuria                   | 16580609             | TP     | HP:0001508 | Failure to thrive             | 16240160<br>15249704 | TP     |
| HP:0002900 | Hypokalemia                    | 12503936             | TP     | HP:0000126 | Hydronephrosis                | 10332005             | TP     |
| HP:0000083 | Renal insufficiency            |                      | FP     | HP:0002902 | Hyponatremia                  |                      | FP     |
| HP:0001249 | Intellectual disability        | 16580609             | TP     | HP:0001947 | Renal tubular acidosis        |                      | FP     |
| HP:0001510 | Growth delay                   | 18584216             | TP     | HP:0010677 | Enuresis nocturna             |                      | FP     |
| HP:0003072 | Hypercalcemia                  |                      | FP     | HP:0008341 | Distal renal tubular acidosis |                      | FP     |
| HP:0001942 | Metabolic acidosis             |                      | FP     | HP:0001276 | Hypertonia                    |                      | FP     |
| HP:0011037 | Decreased urine output         |                      | FP     | HP:0001263 | Global developmental delay    | 15985744             | FN     |
| HP:0003774 | End stage renal disease        | 18519085             | FN     | HP:0001945 | Fever                         | 10332005             | FN     |
| HP:0001250 | Seizures                       | 10332005             | FN     | HP:0002013 | Vomiting                      | 19703807<br>16240160 | FN     |
| HP:0000072 | Hydroureter                    | 10332005             | FN     | HP:0002514 | Cerebral calcification        | 10332005             | FN     |
| HP:0000017 | Nocturia                       | 15249704<br>12784095 | FN     | HP:0001986 | Hypertonic dehydration        | 10332005             | FN     |
| HP:0011106 | Hypovolemia                    | 18715941             | FN     |            |                               |                      |        |

**Table S40.** Overview of HPO annotations for **Focal Segmental Glomerulosclerosis.tab** that were derived by concept recognition in PubMed using BioLark. There were 13 true positives, 51 false positives, and 4 false negatives.

| ID         | Name                                            | pmid               | status | ID         | Name                                | pmid                          | status |
|------------|-------------------------------------------------|--------------------|--------|------------|-------------------------------------|-------------------------------|--------|
| HP:0000097 | Focal segmental glomerulosclerosis              | -                  | TP     | HP:0000093 | Proteinuria                         | 11863085                      | TP     |
| HP:0000100 | Nephrotic syndrome                              |                    | FP     | HP:0000096 | Glomerulosclerosis                  |                               | FP     |
| HP:0000112 | Nephropathy                                     |                    | FP     | HP:0003774 | End stage renal disease             | 12817066                      | TP     |
| HP:0003881 | Humeral sclerosis                               |                    | FP     | HP:0000099 | Glomerulonephritis                  |                               | FP     |
| HP:0000822 | Hypertension                                    |                    | FP     | HP:0100820 | Glomerulopathy                      | -                             | TP     |
| HP:0000083 | Renal insufficiency                             | 11863085           | TP     | HP:0000794 | IgA nephropathy                     |                               | FP     |
| HP:0000793 | Membranoproliferative glomerulonephritis        |                    | FP     | HP:0000123 | Nephritis                           |                               | FP     |
| HP:0000092 | Tubular atrophy                                 |                    | FP     | HP:0005576 | Tubulointerstitial fibrosis         |                               | FP     |
| HP:0001967 | Diffuse mesangial sclerosis                     |                    | FP     | HP:0000790 | Hematuria                           |                               | FP     |
| HP:0003259 | Increased creatinine                            | 8706354            | TP     | HP:0100699 | Scarring                            |                               | FP     |
| HP:0004737 | global glomerulosclerosis                       | -                  | TP     | HP:0002721 | Immunodeficiency                    |                               | FP     |
| HP:0003077 | Hyperlipidemia                                  |                    | FP     | HP:0009741 | Nephrosclerosis                     |                               | FP     |
| HP:0001513 | Obesity                                         |                    | FP     | HP:0003124 | Hypercholesterolemia                |                               | FP     |
| HP:0002907 | Microhematuria                                  | 11863085           | TP     | HP:0000969 | Edema                               |                               | FP     |
| HP:0003073 | Hypoalbuminemia                                 |                    | FP     | HP:0008653 | Necrotizing glomerulonephritis      |                               | FP     |
| HP:0002667 | Nephroblastoma (Wilms tumor)                    |                    | FP     | HP:0003453 | Antineutrophil antibody positivity  |                               | FP     |
| HP:0004722 | Thickening of the glomerular basement membrane  | 7301001            | TP     | HP:0002725 | Systemic lupus erythematosus        |                               | FP     |
| HP:0002633 | Vasculitis                                      |                    | FP     | HP:0000718 | Aggressive behavior                 |                               | FP     |
| HP:0000819 | Diabetes mellitus                               |                    | FP     | HP:0011034 | Amyloidosis                         |                               | FP     |
| HP:0000859 | Hyperaldosteronism                              |                    | FP     | HP:0002621 | Atherosclerosis                     |                               | FP     |
| HP:0002586 | Peritonitis                                     |                    | FP     | HP:0007354 | Amyotrophic lateral sclerosis       |                               | FP     |
| HP:0002955 | Granulomatosis                                  |                    | FP     | HP:0000979 | Purpura                             |                               | FP     |
| HP:0002157 | Azotemia                                        | -                  | TP     | HP:0002155 | Hypertriglyceridemia                |                               | FP     |
| HP:0000037 | Male pseudohermaphroditism                      |                    | FP     | HP:0007430 | Generalized edema                   | 17044480<br>20199191          | TP     |
| HP:0100608 | Metrorrhagia                                    |                    | FP     | HP:0003128 | Lactic acidosis                     |                               | FP     |
| HP:0003613 | Antiphospholipid antibody positivity            |                    | FP     | HP:0003493 | Antinuclear antibody positivity     |                               | FP     |
| HP:0100778 | Cryoglobulinemia                                |                    | FP     | HP:0001917 | Renal amyloidosis                   |                               | FP     |
| HP:0001945 | Fever                                           |                    | FP     | HP:0003076 | Glycosuria                          |                               | FP     |
| HP:0000855 | Insulin resistance                              |                    | FP     | HP:0000028 | Cryptorchidism                      |                               | FP     |
| HP:0003075 | Hypoproteinemia                                 | 18789122           | TP     | HP:0003126 | Low-molecular-weight proteinuria    |                               | FP     |
| HP:0003138 | Increased blood urea nitrogen (BUN)             | -                  | TP     | HP:0010741 | Edema of the lower limbs            |                               | FP     |
| HP:0008723 | Gonadal dysgenesis with female appearance, male |                    | FP     | HP:0003206 | Decreased activity of NADPH oxidase |                               | FP     |
| HP:0001966 | Mesangial abnormality                           | 9064487            | FN     | HP:0004421 | Elevated systolic blood pressure    | -                             | FN     |
| HP:0100520 | Oliguria                                        | 3987100<br>9532830 | FN     | HP:0010980 | Hyperlipoproteinemia                | 8147062<br>9163848<br>3292816 | FN     |

**Table S41.** Overview of HPO annotations for **Renal Artery Obstruction** that were derived by concept recognition in PubMed using BioLark. There were 13 true positives, 47 false positives, and 9 false negatives.

| ID         | Name                                | pmid                | status | ID         | Name                             | pmid     | status |
|------------|-------------------------------------|---------------------|--------|------------|----------------------------------|----------|--------|
| HP:0001920 | Renal artery stenosis               | -                   | TP     | HP:0100817 | Renovascular hypertension        | -        | TP     |
| HP:0000822 | Hypertension                        | -                   | TP     | HP:0000083 | Renal insufficiency              |          | FP     |
| HP:0002621 | Atherosclerosis                     |                     | FP     | HP:0004420 | Arterial thrombosis              |          | FP     |
| HP:0002617 | Aneurysm                            |                     | FP     | HP:0001919 | Acute renal failure              | 4006581  | TP     |
| HP:0000112 | Nephropathy                         |                     | FP     | HP:0100545 | Arterial stenosis                |          | FP     |
| HP:0003774 | End stage renal disease             | 12823672            | TP     | HP:0003259 | Increased creatinine             | 9527401  | TP     |
| HP:0004953 | Abdominal aortic aneurysm           |                     | FP     | HP:0000859 | Hyperaldosteronism               | 19917331 | TP     |
| HP:0004950 | Peripheral arterial disease         |                     | FP     | HP:0001635 | Congestive heart failure         |          | FP     |
| HP:0005313 | Arterial fibromuscular dysplasia    |                     | FP     | HP:0005294 | Arterial dissection              |          | FP     |
| HP:0100519 | Anuria                              | 1259486             | TP     | HP:0001677 | Coronary artery disease          |          | FP     |
| HP:0000093 | Proteinuria                         | 20665031            | TP     | HP:0004942 | Aortic aneurysm                  |          | FP     |
| HP:0100598 | Pulmonary edema                     |                     | FP     | HP:0002527 | Falls                            |          | FP     |
| HP:0005315 | Occlusive arterial disease          |                     | FP     | HP:0000089 | Renal hypoplasia                 |          | FP     |
| HP:0000848 | Increased circulating renin level   | 951017              | TP     | HP:0001067 | Neurofibromas                    |          | FP     |
| HP:0002157 | Azotemia                            | 19671391<br>8720081 | TP     | HP:0008682 | Acute tubular necrosis           |          | FP     |
| HP:0001658 | Myocardial infarction               |                     | FP     | HP:0001650 | Aortic valve stenosis            |          | FP     |
| HP:0000718 | Aggressive behavior                 |                     | FP     | HP:0001297 | Stroke                           |          | FP     |
| HP:0000819 | Diabetes mellitus                   |                     | FP     | HP:0002615 | Hypotension                      |          | FP     |
| HP:0000110 | Renal dysplasia                     |                     | FP     | HP:0001680 | Coarctation of aorta             |          | FP     |
| HP:0004974 | Coarctation of abdominal aorta      |                     | FP     | HP:0002666 | Pheochromocytoma                 |          | FP     |
| HP:0004713 | Reversible renal failure            | 9527401             | TP     | HP:0004947 | Arteriovenous fistula            |          | FP     |
| HP:0000790 | Hematuria                           |                     | FP     | HP:0009741 | Nephrosclerosis                  | 8720083  | TP     |
| HP:0000099 | Glomerulonephritis                  |                     | FP     | HP:0005145 | Coronary artery stenosis         |          | FP     |
| HP:0002647 | Aortic dissection                   |                     | FP     | HP:0002092 | Pulmonary hypertension           |          | FP     |
| HP:0000969 | Edema                               |                     | FP     | HP:0001907 | Thromboembolism                  |          | FP     |
| HP:0000126 | Hydronephrosis                      |                     | FP     | HP:0006000 | Ureteral obstruction             |          | FP     |
| HP:0000077 | Abnormality of the kidney           |                     | FP     | HP:0009726 | Renal neoplasm                   |          | FP     |
| HP:0004936 | Venous thrombosis                   |                     | FP     | HP:0001681 | Angina pectoris                  |          | FP     |
| HP:0004929 | Coronary atherosclerosis            |                     | FP     | HP:0002641 | Peripheral thrombosis            |          | FP     |
| HP:0100860 | Inferior mesenteric artery aneurysm |                     | FP     | HP:0002204 | Pulmonary embolism               |          | FP     |
| HP:0011741 | Secondary hyperaldosteronism        | 6397520             | FN     | HP:0004421 | Elevated systolic blood pressure | 9507221  | FN     |
| HP:0001095 | Hypertensive retinopathy            | 17051904            | FN     | HP:0100735 | Hypertensive crisis              | 7603800  | FN     |
| HP:0000092 | Tubular atrophy                     | 8684534             | FN     | HP:0100520 | Oliguria                         | 12141408 | FN     |
| HP:0002900 | Hypokalemia                         | 19365633            | FN     | HP:0002902 | Hyponatremia                     | 15503172 | FN     |
| HP:0001578 | Hypercortisolism                    | 3725709             | FN     |            |                                  |          |        |

## References

- [1] Lynn Marie Schriml, Cesar Arze, Suvarna Nadendla, Yu-Wei Wayne Chang, Mark Mazaitis, Victor Felix, Gang Feng, and Warren Alden Kibbe. Disease Ontology: a backbone for disease semantic integration. *Nucleic Acids Res*, 40(Database issue):D940–D946, Jan 2012.
